# Supplementary material for: Serum exosomal long noncoding RNAs lnc-FAM72D-3 and lnc-EPC1-4 as diagnostic biomarkers for hepatocellular carcinoma
Source: Aging (Albany NY). 2020 Jun 18;12(12):11843–63. doi: 10.18632/aging.103355 (PMC7343450; doi:10.18632/aging.103355)
Supplement: Supplementary Table 2 [file aging-12-103355-s005..xls]

## Sheet: aging-12-103355-s003
Supplemental table 2. The differentially expressed lncRNA in Normal group vs. Hepatitis group.
geneID	geneLength	N-Expression	H-Expression	N-RPKM	H-RPKM	log2 Ratio(H/N)	Up-Down-Regulation(H/N)	P-value	FDR
lnc-ZNF716-7	334	0	76	0.001	212.362	17.6962	Up	2.21e-20	1.73e-18
lnc-SOX21-8	409	0	88	0.001	200.802	17.6154	Up	1.72e-23	1.92e-21
lnc-MEX3B-5	396	0	79	0.001	186.183	17.5064	Up	3.7e-21	3.22e-19
lnc-RLF-2	319	0	61	0.001	178.463	17.4453	Up	1.71e-16	8.58e-15
lnc-RCOR2-6	284	0	47	0.001	154.45	17.2368	Up	7.26e-13	2.1e-11
lnc-AMPH-5	353	0	58	0.001	153.342	17.2264	Up	1.02e-15	4.64e-14
lnc-GPR137B-1	528	0	82	0.001	144.94	17.1451	Up	6.17e-22	5.91e-20
lnc-NUMBL-1	283	0	41	0.001	135.209	17.0448	Up	2.61e-11	5.82e-10
lnc-ZNF583-3	465	0	60	0.001	120.422	16.8777	Up	3.1e-16	1.5e-14
lnc-CREB3L4-2	880	0	111	0.001	117.72	16.845	Up	1.88e-29	3.17e-27
lnc-LRP12-5	416	0	52	0.001	116.659	16.8319	Up	3.68e-14	1.31e-12
lnc-GYPC-4	208	0	25	0.001	112.172	16.7754	Up	3.65e-07	3.66e-06
lnc-TACR2-3	400	0	48	0.001	111.993	16.773	Up	4e-13	1.21e-11
lnc-MIXL1-4	269	0	30	0.001	104.083	16.6674	Up	1.85e-08	2.42e-07
lnc-BLCAP-6	226	0	25	0.001	103.238	16.6556	Up	3.65e-07	3.67e-06
lnc-TMEM174-1	941	0	101	0.001	100.171	16.6121	Up	7.35e-27	1.08e-24
lnc-SCARF1-2	297	0	31	0.001	97.4124	16.5718	Up	1.02e-08	1.41e-07
lnc-DHX38-13	451	0	45	0.001	93.1204	16.5068	Up	2.4e-12	6.38e-11
lnc-PLD3-2	347	0	34	0.001	91.4447	16.4806	Up	1.7e-09	2.76e-08
lnc-FAM27B-24	584	0	57	0.001	91.0901	16.475	Up	1.86e-15	8.17e-14
lnc-HACL1-3	281	0	27	0.001	89.674	16.4524	Up	1.11e-07	1.24e-06
lnc-NTN1-2	481	0	46	0.001	89.2528	16.4456	Up	1.32e-12	3.63e-11
lnc-PSME2-2	460	0	43	0.001	87.2408	16.4127	Up	7.9e-12	1.95e-10
lnc-TAX1BP1-3	292	0	27	0.001	86.2959	16.397	Up	1.11e-07	1.24e-06
lnc-FUT4-1	357	0	33	0.001	86.269	16.3966	Up	3.09e-09	4.76e-08
lnc-JDP2-1	229	0	21	0.001	85.5841	16.3851	Up	3.98e-06	3.15e-05
lnc-GPR113-1	363	0	33	0.001	84.8431	16.3725	Up	3.09e-09	4.75e-08
lnc-AP000350.4.1-2	531	0	48	0.001	84.3637	16.3643	Up	4e-13	1.21e-11
lnc-SGCG-8	391	0	35	0.001	83.5411	16.3502	Up	9.36e-10	1.6e-08
lnc-HMX3-2	304	0	27	0.001	82.8894	16.3389	Up	1.11e-07	1.25e-06
lnc-DMRTA2-9	214	0	19	0.001	82.8608	16.3384	Up	1.31e-05	8.94e-05
lnc-MYBPC2-1	859	0	76	0.001	82.5714	16.3334	Up	2.21e-20	1.73e-18
lnc-SLC46A1-1	510	0	45	0.001	82.3477	16.3294	Up	2.4e-12	6.39e-11
lnc-GOLGA6L6-7	295	0	26	0.001	82.2546	16.3278	Up	2.01e-07	2.15e-06
lnc-HMGB2-6	285	0	25	0.001	81.8661	16.321	Up	3.65e-07	3.66e-06
lnc-AC021066.1-1	562	0	49	0.001	81.3708	16.3122	Up	2.2e-13	7.01e-12
lnc-USP42-3	736	0	64	0.001	81.1542	16.3084	Up	2.85e-17	1.59e-15
lnc-GPR26-3	647	0	56	0.001	80.7779	16.3017	Up	3.38e-15	1.43e-13
lnc-BOLA2B-2	569	0	49	0.001	80.3698	16.2944	Up	2.2e-13	6.97e-12
lnc-SALL1-3	511	0	44	0.001	80.3602	16.2942	Up	4.35e-12	1.11e-10
lnc-REV1-1	236	0	20	0.001	79.091	16.2712	Up	7.22e-06	5.34e-05
lnc-AC108938.5.1-3	321	0	27	0.001	78.4997	16.2604	Up	1.11e-07	1.25e-06
lnc-CRYAA-4	430	0	36	0.001	78.1345	16.2537	Up	5.15e-10	9.3e-09
lnc-VPREB1-19	360	0	30	0.001	77.7728	16.247	Up	1.85e-08	2.43e-07
lnc-C10orf68-16	411	0	34	0.001	77.2051	16.2364	Up	1.7e-09	2.77e-08
lnc-IMP4-1	411	0	34	0.001	77.2051	16.2364	Up	1.7e-09	2.76e-08
lnc-C2-3	266	0	22	0.001	77.1881	16.2361	Up	2.19e-06	1.85e-05
lnc-ODF3L1-1	646	0	53	0.001	76.5689	16.2245	Up	2.02e-14	7.58e-13
lnc-TTC3-6	305	0	25	0.001	76.4978	16.2231	Up	3.65e-07	3.66e-06
lnc-DHCR7-4	320	0	26	0.001	75.8285	16.2105	Up	2.01e-07	2.14e-06
lnc-SREK1-9	310	0	25	0.001	75.264	16.1997	Up	3.65e-07	3.67e-06
lnc-NPIPP1-2	273	0	22	0.001	75.2089	16.1986	Up	2.19e-06	1.82e-05
lnc-RNF187-1	565	0	45	0.001	74.3315	16.1817	Up	2.4e-12	6.36e-11
lnc-RCOR2-3	277	0	22	0.001	74.1228	16.1776	Up	2.19e-06	1.85e-05
lnc-DLK1-16	215	0	17	0.001	73.7937	16.1712	Up	4.33e-05	0.000261916
lnc-CDH8-7	367	0	29	0.001	73.7464	16.1703	Up	3.36e-08	4.21e-07
lnc-FGF21-2	585	0	46	0.001	73.3856	16.1632	Up	1.32e-12	3.64e-11
lnc-TNFSF10-3	271	0	21	0.001	72.3201	16.1421	Up	3.98e-06	3.14e-05
lnc-NFIA-1	349	0	27	0.001	72.2017	16.1397	Up	1.11e-07	1.24e-06
lnc-SAT2-2	803	0	61	0.001	70.8963	16.1134	Up	1.71e-16	8.59e-15
lnc-SOD3-7	567	0	43	0.001	70.7774	16.111	Up	7.9e-12	1.94e-10
lnc-TRAPPC12-6	343	0	26	0.001	70.7438	16.1103	Up	2.01e-07	2.14e-06
lnc-TK2-2	555	0	42	0.001	70.6261	16.1079	Up	1.44e-11	3.38e-10
lnc-GABPA-10	728	0	55	0.001	70.5083	16.1055	Up	6.13e-15	2.49e-13
lnc-DUXA-1	318	0	24	0.001	70.4358	16.104	Up	6.64e-07	6.32e-06
lnc-FZD9-1	464	0	35	0.001	70.3978	16.1032	Up	9.36e-10	1.6e-08
lnc-FCGR1B-1	664	0	50	0.001	70.2766	16.1008	Up	1.21e-13	4.05e-12
lnc-CHIC2-4	640	0	48	0.001	69.9955	16.095	Up	4e-13	1.22e-11
lnc-FAM102B-4	776	0	58	0.001	69.755	16.09	Up	1.02e-15	4.65e-14
lnc-ITPK1-2	565	0	42	0.001	69.3761	16.0822	Up	1.44e-11	3.37e-10
lnc-FOXD4L5-3	256	0	19	0.001	69.2664	16.0799	Up	1.31e-05	9.06e-05
lnc-AC233282.2-4	313	0	23	0.001	68.5792	16.0655	Up	1.21e-06	1.07e-05
lnc-AKAP3-4	602	0	44	0.001	68.2127	16.0578	Up	4.35e-12	1.11e-10
lnc-P2RX5-4	591	0	43	0.001	67.9032	16.0512	Up	7.9e-12	1.95e-10
lnc-CCDC66-2	304	0	22	0.001	67.5395	16.0434	Up	2.19e-06	1.83e-05
lnc-TRAPPC8-4	388	0	28	0.001	67.3497	16.0394	Up	6.1e-08	7.26e-07
lnc-CCT5-12	305	0	22	0.001	67.3181	16.0387	Up	2.19e-06	1.84e-05
lnc-CAPS-3	209	0	15	0.001	66.9814	16.0315	Up	0.00014269	0.000741838
lnc-SERTM1-1	823	0	59	0.001	66.9054	16.0298	Up	5.64e-16	2.65e-14
lnc-APOLD1-1	461	0	33	0.001	66.807	16.0277	Up	3.09e-09	4.75e-08
lnc-BTN3A2-2	700	0	50	0.001	66.6624	16.0246	Up	1.21e-13	4.05e-12
lnc-ZCCHC10-6	392	0	28	0.001	66.6624	16.0246	Up	6.1e-08	7.23e-07
lnc-NDUFB6-1	268	0	19	0.001	66.1649	16.0138	Up	1.31e-05	9.03e-05
lnc-IL17RB-2	495	0	35	0.001	65.9891	16.0099	Up	9.36e-10	1.61e-08
lnc-IDS-12	242	0	17	0.001	65.5606	16.0005	Up	4.33e-05	0.000259608
lnc-PNPLA4-1	670	0	47	0.001	65.4685	15.9985	Up	7.26e-13	2.1e-11
lnc-VKORC1L1-3	385	0	27	0.001	65.4504	15.9981	Up	1.11e-07	1.25e-06
lnc-UTP11L-6	214	0	15	0.001	65.4164	15.9974	Up	0.00014269	0.000748647
lnc-MRM1-5	415	0	29	0.001	65.2167	15.993	Up	3.36e-08	4.19e-07
lnc-ARAP1-2	458	0	32	0.001	65.2069	15.9927	Up	5.61e-09	8.16e-08
lnc-FAM150B-1	707	0	49	0.001	64.6823	15.9811	Up	2.2e-13	7e-12
lnc-SMUG1-9	796	0	55	0.001	64.485	15.9767	Up	6.13e-15	2.49e-13
lnc-METTL22-2	1028	0	71	0.001	64.4576	15.9761	Up	4.38e-19	2.96e-17
lnc-RP11-90J19.1.1-3	391	0	27	0.001	64.446	15.9758	Up	1.11e-07	1.25e-06
lnc-CCDC125-12	276	0	19	0.001	64.2471	15.9713	Up	1.31e-05	9.07e-05
lnc-ACAD10-2	756	0	52	0.001	64.1934	15.9701	Up	3.68e-14	1.31e-12
lnc-ITIH2-1	799	0	54	0.001	63.0748	15.9448	Up	1.11e-14	4.36e-13
lnc-ZNF649-2	269	0	18	0.001	62.4495	15.9304	Up	2.38e-05	0.000152984
lnc-AMELY-12	299	0	20	0.001	62.4263	15.9299	Up	7.22e-06	5.38e-05
lnc-CEACAM4-3	255	0	17	0.001	62.2182	15.9251	Up	4.33e-05	0.00026052
lnc-BFSP1-1	481	0	32	0.001	62.0889	15.922	Up	5.61e-09	8.15e-08
lnc-AC079135.1.1-4	663	0	44	0.001	61.9367	15.9185	Up	4.35e-12	1.11e-10
lnc-TPGS2-8	586	0	38	0.001	60.5195	15.8851	Up	1.56e-10	3.05e-09
lnc-NRN1L-1	405	0	26	0.001	59.9139	15.8706	Up	2.01e-07	2.13e-06
lnc-IQSEC1-3	453	0	29	0.001	59.746	15.8666	Up	3.36e-08	4.2e-07
lnc-SAMD12-5	578	0	37	0.001	59.7424	15.8665	Up	2.84e-10	5.32e-09
lnc-LIPI-3	204	0	13	0.001	59.4733	15.86	Up	0.000470676	0.00213206
lnc-UGT8-8	237	0	15	0.001	59.068	15.8501	Up	0.00014269	0.000745658
lnc-RP11-419C23.1.1-5	416	0	26	0.001	58.3296	15.8319	Up	2.01e-07	2.15e-06
lnc-FAM210A-9	480	0	30	0.001	58.3296	15.8319	Up	1.85e-08	2.43e-07
lnc-ODF1-1	740	0	46	0.001	58.0143	15.8241	Up	1.32e-12	3.65e-11
lnc-IL17RA-9	586	0	36	0.001	57.3342	15.8071	Up	5.15e-10	9.27e-09
DUSP23	685	0	42	0.001	57.2226	15.8043	Up	1.44e-11	3.36e-10
lnc-NBPF9-3	506	0	31	0.001	57.1768	15.8031	Up	1.02e-08	1.41e-07
lnc-AL901608.1-73	295	0	18	0.001	56.9455	15.7973	Up	2.38e-05	0.000152531
lnc-TMEM154-1	459	0	28	0.001	56.9317	15.7969	Up	6.1e-08	7.23e-07
lnc-CDH1-5	576	0	35	0.001	56.7093	15.7913	Up	9.36e-10	1.6e-08
lnc-MANSC4-6	314	0	19	0.001	56.472	15.7852	Up	1.31e-05	9.05e-05
lnc-ESRRG-3	811	0	49	0.001	56.3877	15.7831	Up	2.2e-13	6.97e-12
lnc-SOX6-6	431	0	26	0.001	56.2996	15.7808	Up	2.01e-07	2.14e-06
lnc-FAM151B-3	531	0	32	0.001	56.2425	15.7794	Up	5.61e-09	8.2e-08
lnc-TIPIN-3	266	0	16	0.001	56.1368	15.7767	Up	7.86e-05	0.000437499
lnc-SYT6-1	449	0	27	0.001	56.1211	15.7763	Up	1.11e-07	1.24e-06
lnc-TAF10-1	433	0	26	0.001	56.0395	15.7742	Up	2.01e-07	2.13e-06
lnc-NCOA3-18	884	0	53	0.001	55.9542	15.772	Up	2.02e-14	7.64e-13
lnc-SLC24A5-8	568	0	34	0.001	55.865	15.7697	Up	1.7e-09	2.75e-08
lnc-FAM18A-5	552	0	33	0.001	55.7935	15.7678	Up	3.09e-09	4.76e-08
lnc-WDR11-7	285	0	17	0.001	55.669	15.7646	Up	4.33e-05	0.000259577
lnc-DDR2-5	505	0	30	0.001	55.442	15.7587	Up	1.85e-08	2.42e-07
lnc-ZNF705D-3	440	0	26	0.001	55.148	15.751	Up	2.01e-07	2.15e-06
lnc-UGP2-5	634	0	37	0.001	54.4655	15.7331	Up	2.84e-10	5.33e-09
lnc-SV2C-4	327	0	19	0.001	54.2269	15.7267	Up	1.31e-05	9.02e-05
lnc-NPHS2-5	863	0	50	0.001	54.0715	15.7226	Up	1.21e-13	4.06e-12
lnc-GTF2F2-3	383	0	22	0.001	53.6084	15.7102	Up	2.19e-06	1.82e-05
lnc-PPP1R32-3	298	0	17	0.001	53.2404	15.7002	Up	4.33e-05	0.000260394
lnc-SEC22A-1	579	0	33	0.001	53.1918	15.6989	Up	3.09e-09	4.78e-08
lnc-PAPPA2-4	580	0	33	0.001	53.1001	15.6964	Up	3.09e-09	4.74e-08
lnc-TUBGCP6-4	478	0	27	0.001	52.7163	15.686	Up	1.11e-07	1.26e-06
lnc-LMX1A-5	320	0	18	0.001	52.4966	15.6799	Up	2.38e-05	0.000153023
lnc-BIRC7-4	338	0	19	0.001	52.4621	15.679	Up	1.31e-05	8.93e-05
lnc-LMAN2L-3	555	0	31	0.001	52.1288	15.6698	Up	1.02e-08	1.41e-07
lnc-C1orf186-1	681	0	38	0.001	52.0769	15.6684	Up	1.56e-10	3.03e-09
lnc-C10orf136-3	251	0	14	0.001	52.0551	15.6678	Up	0.000259154	0.0012678
lnc-AC005323.1.1-3	523	0	29	0.001	51.7494	15.6593	Up	3.36e-08	4.22e-07
lnc-CD36-2	289	0	16	0.001	51.6691	15.657	Up	7.86e-05	0.000435354
lnc-IRGM-2	434	0	24	0.001	51.6096	15.6554	Up	6.64e-07	6.31e-06
lnc-EPSTI1-1	1809	0	100	0.001	51.5906	15.6548	Up	1.33e-26	1.91e-24
lnc-FAM207A-6	671	0	37	0.001	51.4622	15.6512	Up	2.84e-10	5.31e-09
lnc-RBCK1-2	363	0	20	0.001	51.42	15.65	Up	7.22e-06	5.32e-05
lnc-EMP1-5	345	0	19	0.001	51.3977	15.6494	Up	1.31e-05	9.02e-05
lnc-INTS4-3	474	0	26	0.001	51.1922	15.6436	Up	2.01e-07	2.14e-06
lnc-LCNL1-1	1631	0	89	0.001	50.9266	15.6361	Up	9.47e-24	1.08e-21
lnc-HSPA6-3	587	0	32	0.001	50.8769	15.6347	Up	5.61e-09	8.22e-08
lnc-OTX1-4	367	0	20	0.001	50.8596	15.6342	Up	7.22e-06	5.3e-05
lnc-NSRP1-3	514	0	28	0.001	50.8398	15.6337	Up	6.1e-08	7.24e-07
lnc-SRPR-4	443	0	24	0.001	50.5611	15.6257	Up	6.64e-07	6.33e-06
lnc-VWA5B1-1	480	0	26	0.001	50.5523	15.6255	Up	2.01e-07	2.14e-06
lnc-ARHGAP28-8	296	0	16	0.001	50.4472	15.6225	Up	7.86e-05	0.00043799
lnc-HNRNPU-10	259	0	14	0.001	50.4472	15.6225	Up	0.000259154	0.00125411
lnc-FERMT1-2	1203	0	65	0.001	50.4263	15.6219	Up	1.57e-17	9.06e-16
lnc-LGALS7B-2	371	0	20	0.001	50.3113	15.6186	Up	7.22e-06	5.31e-05
lnc-C13orf30-2	576	0	31	0.001	50.2283	15.6162	Up	1.02e-08	1.41e-07
lnc-STX17-3	279	0	15	0.001	50.176	15.6147	Up	0.00014269	0.00074841
lnc-RABEP2-3	467	0	25	0.001	49.9611	15.6085	Up	3.65e-07	3.65e-06
lnc-GUSB-6	1257	0	67	0.001	49.7449	15.6023	Up	4.76e-18	2.91e-16
lnc-SLC16A3-7	432	0	23	0.001	49.6882	15.6006	Up	1.21e-06	1.08e-05
lnc-IL1R2-1	432	0	23	0.001	49.6882	15.6006	Up	1.21e-06	1.08e-05
lnc-FSTL1-1	357	0	19	0.001	49.67	15.6001	Up	1.31e-05	8.98e-05
lnc-C3orf30-21	395	0	21	0.001	49.6171	15.5985	Up	3.98e-06	3.14e-05
lnc-TMEM135-9	301	0	16	0.001	49.6092	15.5983	Up	7.86e-05	0.000435694
lnc-ZNF705A-1	678	0	36	0.001	49.5544	15.5967	Up	5.15e-10	9.28e-09
lnc-CPPED1-2	698	0	37	0.001	49.4715	15.5943	Up	2.84e-10	5.31e-09
lnc-SGSH-3	906	0	48	0.001	49.445	15.5935	Up	4e-13	1.21e-11
lnc-PPME1-2	208	0	11	0.001	49.3558	15.5909	Up	0.00155257	0.00600641
lnc-KDR-7	227	0	12	0.001	49.3361	15.5904	Up	0.000854844	0.00360007
lnc-METTL15-10	228	0	12	0.001	49.1197	15.584	Up	0.000854844	0.00358762
lnc-C10orf122-3	247	0	13	0.001	49.1197	15.584	Up	0.000470676	0.0021224
lnc-MCTP2-2	648	0	34	0.001	48.9681	15.5796	Up	1.7e-09	2.76e-08
lnc-RHCE-2	629	0	33	0.001	48.9635	15.5794	Up	3.09e-09	4.77e-08
lnc-PEX14-3	267	0	14	0.001	48.9357	15.5786	Up	0.000259154	0.00126135
lnc-CEP120-4	649	0	34	0.001	48.8926	15.5773	Up	1.7e-09	2.77e-08
lnc-CHPT1-6	573	0	30	0.001	48.8625	15.5764	Up	1.85e-08	2.45e-07
lnc-SLMO2-1	593	0	31	0.001	48.7883	15.5742	Up	1.02e-08	1.41e-07
lnc-TM7SF4-1	574	0	30	0.001	48.7774	15.5739	Up	1.85e-08	2.43e-07
lnc-ALKBH4-7	230	0	12	0.001	48.6925	15.5714	Up	0.000854844	0.00358701
PTTG2	576	0	30	0.001	48.608	15.5689	Up	1.85e-08	2.44e-07
lnc-BUD31-1	250	0	13	0.001	48.5302	15.5666	Up	0.000470676	0.00211798
lnc-IL15-1	309	0	16	0.001	48.3249	15.5605	Up	7.86e-05	0.000439122
lnc-KIF16B-3	833	0	43	0.001	48.1762	15.556	Up	7.9e-12	1.94e-10
lnc-ATP11B-5	330	0	17	0.001	48.0777	15.5531	Up	4.33e-05	0.000260236
lnc-SPINT2-8	351	0	18	0.001	47.8602	15.5465	Up	2.38e-05	0.000154581
lnc-THSD7B-1	215	0	11	0.001	47.7489	15.5432	Up	0.00155257	0.00597434
CRP	2015	0	103	0.001	47.7058	15.5419	Up	2.23e-27	3.37e-25
lnc-CALML4-5	235	0	12	0.001	47.6565	15.5404	Up	0.000854844	0.00358369
lnc-ATP6V1C2-3	373	0	19	0.001	47.5394	15.5368	Up	1.31e-05	8.97e-05
lnc-BLID-12	432	0	22	0.001	47.5278	15.5365	Up	2.19e-06	1.84e-05
lnc-C12orf70-3	511	0	26	0.001	47.4856	15.5352	Up	2.01e-07	2.15e-06
lnc-ANKRD33B-3	374	0	19	0.001	47.4123	15.533	Up	1.31e-05	9e-05
lnc-AURKA-1	453	0	23	0.001	47.3848	15.5321	Up	1.21e-06	1.08e-05
lnc-ZSCAN5A-3	1103	0	56	0.001	47.3829	15.5321	Up	3.38e-15	1.43e-13
lnc-TAOK1-1	414	0	21	0.001	47.34	15.5308	Up	3.98e-06	3.16e-05
lnc-LAMA1-3	533	0	27	0.001	47.2765	15.5288	Up	1.11e-07	1.25e-06
lnc-TRPS1-3	277	0	14	0.001	47.1691	15.5256	Up	0.000259154	0.00127887
lnc-SLC25A1-4	297	0	15	0.001	47.135	15.5245	Up	0.00014269	0.000750548
lnc-FAM169B-3	436	0	22	0.001	47.0918	15.5232	Up	2.19e-06	1.85e-05
lnc-HPS4-2	357	0	18	0.001	47.0558	15.5221	Up	2.38e-05	0.000154642
lnc-STAMBP-3	258	0	13	0.001	47.0254	15.5212	Up	0.000470676	0.00210087
lnc-CBX5-2	451	0	30	0.001	46.8198	15.5148	Up	1.85e-08	2.45e-07
lnc-C7orf30-4	359	0	18	0.001	46.7937	15.514	Up	2.38e-05	0.000154986
lnc-PARVA-1	419	0	21	0.001	46.7751	15.5135	Up	3.98e-06	3.16e-05
lnc-GUCY1A3-4	519	0	26	0.001	46.7536	15.5128	Up	2.01e-07	2.15e-06
lnc-FBXO9-4	340	0	17	0.001	46.6637	15.51	Up	4.33e-05	0.000262715
lnc-MUT-1	340	0	17	0.001	46.6637	15.51	Up	4.33e-05	0.000262619
lnc-JOSD1-1	1080	0	54	0.001	46.6637	15.51	Up	1.11e-14	4.36e-13
lnc-TFEB-5	441	0	22	0.001	46.5579	15.5067	Up	2.19e-06	1.83e-05
lnc-NDE1-4	782	0	39	0.001	46.5443	15.5063	Up	8.6e-11	1.74e-09
lnc-ZEB1-8	342	0	17	0.001	46.3908	15.5016	Up	4.33e-05	0.000262011
lnc-PTPRT-3	343	0	17	0.001	46.2555	15.4973	Up	4.33e-05	0.000262844
lnc-CADM2-9	343	0	17	0.001	46.2555	15.4973	Up	4.33e-05	0.000259796
lnc-RECQL5-2	566	0	28	0.001	46.169	15.4946	Up	6.1e-08	7.27e-07
lnc-EFHB-1	286	0	14	0.001	45.6847	15.4794	Up	0.000259154	0.00125925
lnc-RIN3-1	368	0	18	0.001	45.6493	15.4783	Up	2.38e-05	0.000152472
lnc-FGF9-6	307	0	15	0.001	45.5997	15.4767	Up	0.00014269	0.000740908
lnc-STK17A-1	1969	0	96	0.001	45.5024	15.4737	Up	1.45e-25	1.89e-23
lnc-STXBP3-2	783	0	38	0.001	45.293	15.467	Up	1.56e-10	3.06e-09
lnc-STK35-3	268	0	13	0.001	45.2707	15.4663	Up	0.000470676	0.00212741
lnc-TUBB2B-5	290	0	14	0.001	45.0546	15.4594	Up	0.000259154	0.00124755
lnc-DYNC1H1-5	228	0	11	0.001	45.0264	15.4585	Up	0.00155257	0.00599708
lnc-WAPAL-3	249	0	12	0.001	44.977	15.4569	Up	0.000854844	0.00360465
lnc-ERAL1-4	436	0	21	0.001	44.9513	15.4561	Up	3.98e-06	3.13e-05
lnc-UTP11L-5	790	0	38	0.001	44.8916	15.4542	Up	1.56e-10	3.04e-09
lnc-AL136218.1-1	731	0	35	0.001	44.6848	15.4475	Up	9.36e-10	1.6e-08
lnc-ZNF730-8	544	0	26	0.001	44.605	15.4449	Up	2.01e-07	2.14e-06
lnc-GLOD4-4	545	0	26	0.001	44.5232	15.4423	Up	2.01e-07	2.15e-06
lnc-GOLGA8F-3	336	0	16	0.001	44.4416	15.4396	Up	7.86e-05	0.000443056
lnc-TOP1-6	630	0	30	0.001	44.4416	15.4396	Up	1.85e-08	2.44e-07
lnc-COX7A1-2	379	0	18	0.001	44.3243	15.4358	Up	2.38e-05	0.000153281
lnc-SETD6-10	295	0	14	0.001	44.291	15.4347	Up	0.000259154	0.00125325
lnc-NMUR1-3	527	0	25	0.001	44.2729	15.4341	Up	3.65e-07	3.68e-06
lnc-THBS2-13	654	0	31	0.001	44.2377	15.433	Up	1.02e-08	1.4e-07
lnc-PLXDC2-8	380	0	18	0.001	44.2077	15.432	Up	2.38e-05	0.000152727
lnc-SYNPO-5	486	0	23	0.001	44.1673	15.4307	Up	1.21e-06	1.08e-05
lnc-RP11-467M13.1.1-9	296	0	14	0.001	44.1413	15.4298	Up	0.000259154	0.00126234
lnc-MYLK4-3	593	0	28	0.001	44.0669	15.4274	Up	6.1e-08	7.25e-07
lnc-NEO1-2	530	0	25	0.001	44.0223	15.4259	Up	3.65e-07	3.68e-06
lnc-C2CD4B-1	850	0	40	0.001	43.9188	15.4225	Up	4.73e-11	1.01e-09
lnc-EN2-1	468	0	22	0.001	43.8718	15.421	Up	2.19e-06	1.84e-05
lnc-PSMG4-17	1064	0	50	0.001	43.8568	15.4205	Up	1.21e-13	4.06e-12
SPRR4	745	0	35	0.001	43.8451	15.4201	Up	9.36e-10	1.6e-08
lnc-EXD2-5	362	0	17	0.001	43.8278	15.4196	Up	4.33e-05	0.000259327
lnc-ZNF467-4	1364	0	64	0.001	43.79	15.4183	Up	2.85e-17	1.59e-15
lnc-LYZL1-4	1583	0	74	0.001	43.6275	15.4129	Up	7.31e-20	5.42e-18
lnc-NR1H4-1	343	0	16	0.001	43.5346	15.4099	Up	7.86e-05	0.000441205
lnc-MME-6	322	0	15	0.001	43.4755	15.4079	Up	0.00014269	0.00074425
lnc-RAB11A-3	494	0	23	0.001	43.452	15.4071	Up	1.21e-06	1.08e-05
lnc-PZP-9	215	0	10	0.001	43.4081	15.4057	Up	0.0028198	0.0100138
lnc-CLIP4-1	512	0	24	0.001	43.4081	15.4057	Up	6.64e-07	6.28e-06
lnc-C16orf72-2	409	0	19	0.001	43.355	15.4039	Up	1.31e-05	9.07e-05
lnc-SCPEP1-1	669	0	31	0.001	43.2459	15.4003	Up	1.02e-08	1.4e-07
PRPS1L1	1087	0	50	0.001	42.9289	15.3897	Up	1.21e-13	4.04e-12
lnc-ATM-4	435	0	20	0.001	42.9091	15.389	Up	7.22e-06	5.37e-05
lnc-RPS24-10	1175	0	54	0.001	42.8909	15.3884	Up	1.11e-14	4.35e-13
lnc-ERGIC3-1	981	0	45	0.001	42.8107	15.3857	Up	2.4e-12	6.4e-11
lnc-RDH8-3	916	0	42	0.001	42.792	15.3851	Up	1.44e-11	3.38e-10
lnc-SMEK1-6	918	0	42	0.001	42.6988	15.3819	Up	1.44e-11	3.38e-10
lnc-ANGPTL1-11	306	0	14	0.001	42.6988	15.3819	Up	0.000259154	0.00125557
lnc-PLXNC1-4	285	0	13	0.001	42.5704	15.3776	Up	0.000470676	0.0021278
lnc-MPHOSPH6-5	286	0	13	0.001	42.4215	15.3725	Up	0.000470676	0.00213849
lnc-TCF7L2-6	308	0	14	0.001	42.4215	15.3725	Up	0.000259154	0.00126086
lnc-DIAPH2-6	286	0	13	0.001	42.4215	15.3725	Up	0.000470676	0.00210654
lnc-SDK2-4	419	0	19	0.001	42.3203	15.3691	Up	1.31e-05	8.99e-05
lnc-DOPEY2-1	596	0	27	0.001	42.2792	15.3677	Up	1.11e-07	1.25e-06
lnc-ASPH-6	287	0	13	0.001	42.2737	15.3675	Up	0.000470676	0.00215146
lnc-ZFP57-13	243	0	11	0.001	42.247	15.3666	Up	0.00155257	0.00588284
lnc-KLF10-3	553	0	25	0.001	42.1914	15.3647	Up	3.65e-07	3.66e-06
lnc-CCR6-2	731	0	33	0.001	42.1314	15.3626	Up	3.09e-09	4.75e-08
lnc-DISP1-6	1177	0	53	0.001	42.0251	15.359	Up	2.02e-14	7.59e-13
lnc-CLNK-1	400	0	18	0.001	41.9973	15.358	Up	2.38e-05	0.000154925
lnc-CKS1B-4	690	0	31	0.001	41.9297	15.3557	Up	1.02e-08	1.42e-07
lnc-FAM78B-4	535	0	24	0.001	41.8665	15.3535	Up	6.64e-07	6.28e-06
lnc-COL4A3-4	559	0	25	0.001	41.7385	15.3491	Up	3.65e-07	3.65e-06
lnc-ETS2-5	336	0	15	0.001	41.664	15.3465	Up	0.00014269	0.000742614
lnc-MEX3B-1	829	0	37	0.001	41.654	15.3462	Up	2.84e-10	5.33e-09
lnc-TPST1-2	426	0	19	0.001	41.6249	15.3452	Up	1.31e-05	8.94e-05
lnc-C7orf41-6	247	0	11	0.001	41.5628	15.343	Up	0.00155257	0.00605303
lnc-CPLX1-8	719	0	32	0.001	41.5365	15.3421	Up	5.61e-09	8.18e-08
lnc-EIF4A2-1	540	0	24	0.001	41.4788	15.3401	Up	6.64e-07	6.31e-06
lnc-SRI-1	450	0	20	0.001	41.4788	15.3401	Up	7.22e-06	5.35e-05
lnc-RP11-404P21.6.1-4	225	0	10	0.001	41.4788	15.3401	Up	0.0028198	0.0100124
lnc-FOXP4-2	743	0	33	0.001	41.4509	15.3391	Up	3.09e-09	4.77e-08
lnc-PBX3-3	316	0	14	0.001	41.3476	15.3355	Up	0.000259154	0.00126805
lnc-DNM1L-5	316	0	14	0.001	41.3476	15.3355	Up	0.000259154	0.00126494
lnc-WWC1-1	474	0	21	0.001	41.3476	15.3355	Up	3.98e-06	3.13e-05
lnc-POLE-1	1423	0	63	0.001	41.3185	15.3345	Up	5.18e-17	2.79e-15
lnc-ZNF791-8	226	0	10	0.001	41.2953	15.3337	Up	0.0028198	0.00981129
lnc-NEUROG3-2	476	0	21	0.001	41.1738	15.3294	Up	3.98e-06	3.15e-05
lnc-DLGAP1-9	523	0	23	0.001	41.0426	15.3248	Up	1.21e-06	1.07e-05
lnc-HOOK1-4	683	0	30	0.001	40.993	15.3231	Up	1.85e-08	2.43e-07
lnc-RP11-1220K2.2.1-6	342	0	15	0.001	40.9331	15.321	Up	0.00014269	0.000743236
lnc-UBE3A-8	252	0	11	0.001	40.7381	15.3141	Up	0.00155257	0.00606635
lnc-LRTM2-5	688	0	30	0.001	40.6951	15.3126	Up	1.85e-08	2.44e-07
lnc-ARNTL-1	368	0	16	0.001	40.5771	15.3084	Up	7.86e-05	0.00043858
lnc-CYS1-7	783	0	34	0.001	40.5253	15.3065	Up	1.7e-09	2.76e-08
CLDN9	2050	0	89	0.001	40.5177	15.3063	Up	9.47e-24	1.08e-21
lnc-GNRH2-1	415	0	18	0.001	40.4793	15.3049	Up	2.38e-05	0.000153798
lnc-INSL4-6	670	0	29	0.001	40.3954	15.3019	Up	3.36e-08	4.21e-07
lnc-CLCNKB-4	439	0	19	0.001	40.3923	15.3018	Up	1.31e-05	8.92e-05
lnc-COX10-6	647	0	28	0.001	40.389	15.3017	Up	6.1e-08	7.21e-07
lnc-DEFB116-1	460	0	31	0.001	40.2385	15.2963	Up	1.02e-08	1.42e-07
lnc-C9orf146-6	696	0	30	0.001	40.2273	15.2959	Up	1.85e-08	2.45e-07
lnc-OPRD1-3	395	0	17	0.001	40.1662	15.2937	Up	4.33e-05	0.000261343
lnc-REXO1-1	372	0	16	0.001	40.1408	15.2928	Up	7.86e-05	0.000438728
lnc-DDX52-1	279	0	12	0.001	40.1408	15.2928	Up	0.000854844	0.00352193
lnc-RTDR1-4	814	0	35	0.001	40.1285	15.2923	Up	9.36e-10	1.6e-08
lnc-ARHGEF2-1	1350	0	58	0.001	40.0962	15.2912	Up	1.02e-15	4.64e-14
lnc-RAD54L2-4	233	0	10	0.001	40.0547	15.2897	Up	0.0028198	0.00984712
lnc-SLC25A28-1	303	0	13	0.001	40.0414	15.2892	Up	0.000470676	0.00212935
OR4D1	933	0	40	0.001	40.0117	15.2881	Up	4.73e-11	1.01e-09
lnc-GRIN3A-2	490	0	21	0.001	39.9974	15.2876	Up	3.98e-06	3.13e-05
PRSS1	817	0	35	0.001	39.9811	15.287	Up	9.36e-10	1.59e-08
lnc-PLCG2-6	2055	0	88	0.001	39.965	15.2864	Up	1.72e-23	1.92e-21
lnc-TREM1-3	514	0	22	0.001	39.9456	15.2857	Up	2.19e-06	1.84e-05
lnc-PPIAL4A-5	561	0	24	0.001	39.9261	15.285	Up	6.64e-07	6.33e-06
lnc-AC090616.2.1-1	234	0	10	0.001	39.8835	15.2835	Up	0.0028198	0.00989507
lnc-SMC5-5	445	0	19	0.001	39.8476	15.2822	Up	1.31e-05	9.05e-05
lnc-PRRC2C-4	422	0	18	0.001	39.8079	15.2808	Up	2.38e-05	0.000153838
lnc-SOX30-3	211	0	9	0.001	39.8079	15.2808	Up	0.00512132	0.0164146
lnc-ZRANB1-2	530	0	20	0.001	39.7985	15.2804	Up	7.22e-06	5.38e-05
lnc-KDM4B-3	821	0	35	0.001	39.7863	15.28	Up	9.36e-10	1.6e-08
lnc-IL1A-1	447	0	19	0.001	39.6694	15.2757	Up	1.31e-05	8.96e-05
lnc-IBTK-8	518	0	22	0.001	39.6371	15.2746	Up	2.19e-06	1.83e-05
lnc-AKT1-1	1225	0	52	0.001	39.6165	15.2738	Up	3.68e-14	1.32e-12
lnc-SCN11A-1	472	0	20	0.001	39.5455	15.2712	Up	7.22e-06	5.36e-05
lnc-RFX8-3	425	0	18	0.001	39.5269	15.2705	Up	2.38e-05	0.000153579
lnc-SCAF1-2	497	0	21	0.001	39.4341	15.2672	Up	3.98e-06	3.15e-05
lnc-SNX7-7	284	0	12	0.001	39.4341	15.2672	Up	0.000854844	0.00351785
TAS2R40	972	0	41	0.001	39.3665	15.2647	Up	2.61e-11	5.82e-10
lnc-ZNF519-2	830	0	35	0.001	39.3549	15.2643	Up	9.36e-10	1.6e-08
lnc-NEU4-1	451	0	19	0.001	39.3175	15.2629	Up	1.31e-05	9.03e-05
lnc-BEST4-2	546	0	23	0.001	39.3137	15.2627	Up	1.21e-06	1.08e-05
lnc-C1orf31-10	570	0	24	0.001	39.2957	15.2621	Up	6.64e-07	6.32e-06
lnc-CDK5RAP2-1	475	0	20	0.001	39.2957	15.2621	Up	7.22e-06	5.35e-05
lnc-CERS4-4	737	0	31	0.001	39.2557	15.2606	Up	1.02e-08	1.41e-07
lnc-GPR110-2	761	0	32	0.001	39.2441	15.2602	Up	5.61e-09	8.17e-08
lnc-RHOD-2	999	0	42	0.001	39.2367	15.2599	Up	1.44e-11	3.39e-10
lnc-TRIM24-4	238	0	10	0.001	39.2132	15.2591	Up	0.0028198	0.00986513
lnc-PDCD11-2	524	0	22	0.001	39.1832	15.2579	Up	2.19e-06	1.83e-05
lnc-CYP1B1-2	859	0	36	0.001	39.1128	15.2554	Up	5.15e-10	9.29e-09
lnc-DCAF17-1	239	0	10	0.001	39.0491	15.253	Up	0.0028198	0.0100038
lnc-AKR1D1-6	1056	0	44	0.001	38.8864	15.247	Up	4.35e-12	1.11e-10
lnc-IGSF9B-1	1130	0	47	0.001	38.8176	15.2444	Up	7.26e-13	2.1e-11
lnc-AC015987.1-3	457	0	19	0.001	38.8013	15.2438	Up	1.31e-05	9.01e-05
lnc-TUBB2B-9	290	0	12	0.001	38.6182	15.237	Up	0.000854844	0.00358308
lnc-CPB2-2	290	0	12	0.001	38.6182	15.237	Up	0.000854844	0.00358187
lnc-CHD9-2	532	0	22	0.001	38.594	15.2361	Up	2.19e-06	1.84e-05
lnc-OSBPL1A-4	774	0	32	0.001	38.585	15.2358	Up	5.61e-09	8.21e-08
lnc-PCSK5-2	339	0	14	0.001	38.5423	15.2342	Up	0.000259154	0.00127043
lnc-COX4NB-3	315	0	13	0.001	38.5161	15.2332	Up	0.000470676	0.0021489
lnc-SERPINA12-1	994	0	41	0.001	38.4952	15.2324	Up	2.61e-11	5.83e-10
lnc-KCNV2-10	291	0	12	0.001	38.4855	15.232	Up	0.000854844	0.00358067
lnc-AL137145.1-1	1290	0	53	0.001	38.3438	15.2267	Up	2.02e-14	7.61e-13
lnc-KIF18A-6	391	0	16	0.001	38.1902	15.2209	Up	7.86e-05	0.000436815
lnc-CIB3-4	367	0	15	0.001	38.1447	15.2192	Up	0.00014269	0.000739287
lnc-FOXD4L3-1	416	0	17	0.001	38.1386	15.219	Up	4.33e-05	0.000261597
OR2A12	933	0	38	0.001	38.0111	15.2141	Up	1.56e-10	3.05e-09
lnc-GDF6-3	835	0	34	0.001	38.0016	15.2138	Up	1.7e-09	2.77e-08
lnc-ZFYVE26-5	295	0	12	0.001	37.9637	15.2123	Up	0.000854844	0.00356984
lnc-DAP-3	320	0	13	0.001	37.9142	15.2105	Up	0.000470676	0.00214771
lnc-SSX3-2	271	0	11	0.001	37.882	15.2092	Up	0.00155257	0.00589857
lnc-CRYGN-3	557	0	31	0.001	37.8684	15.2087	Up	1.02e-08	1.41e-07
lnc-RBM45-6	222	0	9	0.001	37.8354	15.2074	Up	0.00512132	0.0163262
lnc-A2M-3	593	0	24	0.001	37.7716	15.205	Up	6.64e-07	6.33e-06
lnc-POTED-12	346	0	14	0.001	37.7625	15.2047	Up	0.000259154	0.00127281
lnc-AC233263.1-4	717	0	29	0.001	37.7475	15.2041	Up	3.36e-08	4.21e-07
lnc-OR1F1-2	1015	0	41	0.001	37.6987	15.2022	Up	2.61e-11	5.83e-10
OR10Z1	942	0	38	0.001	37.648	15.2003	Up	1.56e-10	3.03e-09
lnc-HIST2H3PS2-8	248	0	10	0.001	37.632	15.1997	Up	0.0028198	0.0100439
lnc-KATNAL2-6	273	0	11	0.001	37.6044	15.1986	Up	0.00155257	0.00598314
lnc-MYOT-2	298	0	12	0.001	37.5815	15.1977	Up	0.000854844	0.00358944
lnc-ZNF672-3	249	0	10	0.001	37.4809	15.1939	Up	0.0028198	0.0100131
lnc-ERBB4-1	249	0	10	0.001	37.4809	15.1939	Up	0.0028198	0.00982849
lnc-C10orf136-4	498	0	20	0.001	37.4809	15.1939	Up	7.22e-06	5.3e-05
lnc-IGFN1-6	748	0	30	0.001	37.4308	15.1919	Up	1.85e-08	2.42e-07
lnc-CCL5-3	474	0	19	0.001	37.4097	15.1911	Up	1.31e-05	9.03e-05
lnc-GATSL1-7	825	0	33	0.001	37.3309	15.1881	Up	3.09e-09	4.76e-08
lnc-HAPLN3-2	500	0	20	0.001	37.3309	15.1881	Up	7.22e-06	5.34e-05
lnc-PAM16-3	475	0	19	0.001	37.3309	15.1881	Up	1.31e-05	8.93e-05
lnc-HAX1-2	301	0	12	0.001	37.2069	15.1833	Up	0.000854844	0.00356924
lnc-TMEM178-2	853	0	34	0.001	37.1997	15.183	Up	1.7e-09	2.75e-08
lnc-COL6A3-4	2158	0	86	0.001	37.1926	15.1827	Up	5.67e-23	5.9e-21
lnc-ANTXR2-4	226	0	9	0.001	37.1658	15.1817	Up	0.00512132	0.0163682
lnc-MARCH7-2	1333	0	53	0.001	37.1069	15.1794	Up	2.02e-14	7.62e-13
lnc-RARS-4	1489	0	59	0.001	36.98	15.1745	Up	5.64e-16	2.64e-14
lnc-CUL7-1	303	0	12	0.001	36.9613	15.1737	Up	0.000854844	0.00352982
lnc-COMMD5-2	1239	0	49	0.001	36.9091	15.1717	Up	2.2e-13	6.99e-12
OR52J3	936	0	37	0.001	36.8922	15.171	Up	2.84e-10	5.3e-09
lnc-HES1-4	1771	0	70	0.001	36.8883	15.1709	Up	7.95e-19	5.28e-17
lnc-AC068473.1-1	760	0	30	0.001	36.8398	15.169	Up	1.85e-08	2.45e-07
lnc-CCR4-1	355	0	14	0.001	36.8052	15.1676	Up	0.000259154	0.00125374
lnc-ALKBH4-3	279	0	11	0.001	36.7957	15.1673	Up	0.00155257	0.00602845
lnc-KCNH3-4	279	0	11	0.001	36.7957	15.1673	Up	0.00155257	0.00589272
lnc-CEP120-3	203	0	8	0.001	36.7793	15.1666	Up	0.00930136	0.0268247
lnc-SPRR4-1	432	0	17	0.001	36.726	15.1645	Up	4.33e-05	0.000260709
lnc-DEPTOR-2	280	0	11	0.001	36.6643	15.1621	Up	0.00155257	0.00590444
lnc-SLC25A32-2	969	0	38	0.001	36.599	15.1595	Up	1.56e-10	3.05e-09
lnc-C14orf79-1	204	0	8	0.001	36.599	15.1595	Up	0.00930136	0.0271283
lnc-CGA-1	306	0	12	0.001	36.599	15.1595	Up	0.000854844	0.00355819
lnc-EMB-7	408	0	16	0.001	36.599	15.1595	Up	7.86e-05	0.000437402
lnc-SENP5-1	562	0	22	0.001	36.5338	15.1569	Up	2.19e-06	1.83e-05
lnc-FN3KRP-2	1381	0	54	0.001	36.493	15.1553	Up	1.11e-14	4.34e-13
A3GALT2	1023	0	40	0.001	36.4916	15.1553	Up	4.73e-11	1.01e-09
lnc-GSDMC-11	461	0	18	0.001	36.4402	15.1532	Up	2.38e-05	0.0001544
lnc-HMGN2-4	590	0	23	0.001	36.3819	15.1509	Up	1.21e-06	1.09e-05
lnc-NPC1L1-1	308	0	12	0.001	36.3613	15.1501	Up	0.000854844	0.00353041
KRTAP2-1	773	0	30	0.001	36.2202	15.1445	Up	1.85e-08	2.45e-07
lnc-SPZ1-1	1572	0	61	0.001	36.2148	15.1443	Up	1.71e-16	8.57e-15
lnc-LMO2-4	696	0	27	0.001	36.2046	15.1439	Up	1.11e-07	1.25e-06
lnc-MTHFS-2	232	0	9	0.001	36.2046	15.1439	Up	0.00512132	0.016343
lnc-C19orf6-3	722	0	28	0.001	36.1934	15.1434	Up	6.1e-08	7.26e-07
lnc-SOBP-2	258	0	10	0.001	36.1734	15.1426	Up	0.0028198	0.00989647
lnc-RP11-680F20.4.1-1	698	0	27	0.001	36.1008	15.1397	Up	1.11e-07	1.24e-06
lnc-PPP1R3B-5	388	0	15	0.001	36.0802	15.1389	Up	0.00014269	0.00074176
lnc-IRGC-2	518	0	20	0.001	36.0337	15.1371	Up	7.22e-06	5.33e-05
lnc-DKK3-2	519	0	20	0.001	35.9643	15.1343	Up	7.22e-06	5.31e-05
lnc-NFKBIA-1	624	0	24	0.001	35.8951	15.1315	Up	6.64e-07	6.28e-06
lnc-RSPH10B-2	546	0	21	0.001	35.8951	15.1315	Up	3.98e-06	3.13e-05
lnc-RP11-998D10.1.1-1	469	0	18	0.001	35.8186	15.1284	Up	2.38e-05	0.000152492
lnc-GRP-2	417	0	16	0.001	35.8091	15.128	Up	7.86e-05	0.000434918
TAS2R39	1017	0	39	0.001	35.7893	15.1272	Up	8.6e-11	1.75e-09
lnc-ZFAT-7	209	0	8	0.001	35.7234	15.1246	Up	0.00930136	0.0265826
lnc-RPL19-4	366	0	14	0.001	35.699	15.1236	Up	0.000259154	0.00126184
lnc-ELAVL4-1	314	0	12	0.001	35.6665	15.1223	Up	0.000854844	0.00359612
lnc-C4orf39-1	551	0	21	0.001	35.5694	15.1183	Up	3.98e-06	3.15e-05
lnc-VTI1A-7	656	0	25	0.001	35.5668	15.1182	Up	3.65e-07	3.68e-06
lnc-TCP11L1-3	394	0	15	0.001	35.5307	15.1168	Up	0.00014269	0.000740367
lnc-ASB13-1	657	0	25	0.001	35.5127	15.116	Up	3.65e-07	3.65e-06
lnc-CHMP2A-1	447	0	17	0.001	35.4936	15.1153	Up	4.33e-05	0.000261565
lnc-RHOB-8	263	0	10	0.001	35.4857	15.1149	Up	0.0028198	0.0100916
lnc-P2RX5-1	316	0	12	0.001	35.4408	15.1131	Up	0.000854844	0.00354159
lnc-SNX14-2	606	0	23	0.001	35.4213	15.1123	Up	1.21e-06	1.08e-05
lnc-GINS3-1	580	0	22	0.001	35.4	15.1115	Up	2.19e-06	1.84e-05
lnc-TMEM133-2	317	0	12	0.001	35.329	15.1086	Up	0.000854844	0.00357464
lnc-GC-3	978	0	37	0.001	35.3079	15.1077	Up	2.84e-10	5.31e-09
lnc-AC233282.2-2	345	0	13	0.001	35.1668	15.1019	Up	0.000470676	0.00214555
lnc-EEA1-5	1593	0	60	0.001	35.1516	15.1013	Up	3.1e-16	1.51e-14
lnc-GPR97-1	558	0	21	0.001	35.1232	15.1001	Up	3.98e-06	3.14e-05
lnc-NCOA3-16	213	0	8	0.001	35.0525	15.0972	Up	0.00930136	0.0272948
lnc-CD180-9	959	0	36	0.001	35.0343	15.0965	Up	5.15e-10	9.26e-09
lnc-GIMAP5-3	560	0	21	0.001	34.9978	15.095	Up	3.98e-06	3.15e-05
lnc-DEAF1-1	294	0	11	0.001	34.9184	15.0917	Up	0.00155257	0.00594078
lnc-STON1-GTF2A1L-2	294	0	11	0.001	34.9184	15.0917	Up	0.00155257	0.00589902
lnc-DHX38-19	1417	0	53	0.001	34.9072	15.0912	Up	2.02e-14	7.59e-13
lnc-GDAP2-8	214	0	8	0.001	34.8887	15.0905	Up	0.00930136	0.0270633
lnc-EDAR-1	455	0	17	0.001	34.8696	15.0897	Up	4.33e-05	0.000262171
lnc-POC5-3	910	0	34	0.001	34.8696	15.0897	Up	1.7e-09	2.76e-08
lnc-BBS5-5	241	0	9	0.001	34.8525	15.089	Up	0.00512132	0.0162741
lnc-SYT8-4	482	0	18	0.001	34.8525	15.089	Up	2.38e-05	0.000152767
lnc-OCA2-8	780	0	29	0.001	34.6986	15.0826	Up	3.36e-08	4.19e-07
lnc-BAGE4-2	269	0	10	0.001	34.6942	15.0824	Up	0.0028198	0.00989577
lnc-SORBS1-1	405	0	15	0.001	34.5657	15.0771	Up	0.00014269	0.000746756
lnc-ZFPM2-3	216	0	8	0.001	34.5657	15.0771	Up	0.00930136	0.0272386
lnc-PTDSS1-4	243	0	9	0.001	34.5657	15.0771	Up	0.00512132	0.016519
lnc-SPAG1-3	648	0	24	0.001	34.5657	15.0771	Up	6.64e-07	6.29e-06
lnc-THBS4-5	243	0	9	0.001	34.5657	15.0771	Up	0.00512132	0.0164901
lnc-RGS9-4	432	0	16	0.001	34.5657	15.0771	Up	7.86e-05	0.000434725
lnc-MYO7B-1	649	0	24	0.001	34.5124	15.0748	Up	6.64e-07	6.3e-06
lnc-EIF3A-5	622	0	23	0.001	34.5101	15.0747	Up	1.21e-06	1.07e-05
lnc-SFI1-4	677	0	25	0.001	34.4636	15.0728	Up	3.65e-07	3.66e-06
lnc-USP14-1	813	0	30	0.001	34.4381	15.0717	Up	1.85e-08	2.44e-07
LINC00260	1275	0	47	0.001	34.403	15.0702	Up	7.26e-13	2.11e-11
lnc-ZNF502-1	543	0	20	0.001	34.3747	15.0691	Up	7.22e-06	5.37e-05
ANG	1222	0	45	0.001	34.3677	15.0688	Up	2.4e-12	6.37e-11
lnc-PCBP1-7	788	0	29	0.001	34.3464	15.0679	Up	3.36e-08	4.21e-07
lnc-KLHL31-9	299	0	11	0.001	34.3345	15.0674	Up	0.00155257	0.00594261
lnc-RHOB-5	598	0	22	0.001	34.3345	15.0674	Up	2.19e-06	1.83e-05
lnc-SRRM3-5	435	0	16	0.001	34.3273	15.0671	Up	7.86e-05	0.000442655
lnc-C2CD4A-4	925	0	34	0.001	34.3041	15.0661	Up	1.7e-09	2.75e-08
lnc-TNKS-2	517	0	19	0.001	34.2983	15.0658	Up	1.31e-05	9e-05
lnc-PTH-4	409	0	15	0.001	34.2276	15.0629	Up	0.00014269	0.000747937
lnc-TCF7-4	1418	0	52	0.001	34.2244	15.0627	Up	3.68e-14	1.32e-12
lnc-LCE1C-2	273	0	10	0.001	34.1859	15.0611	Up	0.0028198	0.00987208
lnc-CYB5R2-5	437	0	16	0.001	34.1702	15.0605	Up	7.86e-05	0.000435451
lnc-TUBGCP4-2	519	0	19	0.001	34.1661	15.0603	Up	1.31e-05	8.98e-05
lnc-C10orf90-5	1284	0	47	0.001	34.1619	15.0601	Up	7.26e-13	2.11e-11
ANP32AP1	738	0	27	0.001	34.1442	15.0594	Up	1.11e-07	1.25e-06
lnc-SLC6A9-7	520	0	19	0.001	34.1004	15.0575	Up	1.31e-05	9.02e-05
lnc-CYorf17-6	219	0	8	0.001	34.0922	15.0572	Up	0.00930136	0.0273029
lnc-ID1-1	356	0	13	0.001	34.0802	15.0566	Up	0.000470676	0.00212838
lnc-TAOK3-7	658	0	24	0.001	34.0404	15.055	Up	6.64e-07	6.25e-06
lnc-SCAF4-3	384	0	14	0.001	34.0256	15.0543	Up	0.000259154	0.00127558
lnc-NEIL2-1	384	0	14	0.001	34.0256	15.0543	Up	0.000259154	0.00126718
lnc-C21orf62-1	384	0	14	0.001	34.0256	15.0543	Up	0.000259154	0.00125741
lnc-TMEM167A-6	302	0	11	0.001	33.9934	15.053	Up	0.00155257	0.00606873
lnc-SLC38A8-4	906	0	33	0.001	33.9934	15.053	Up	3.09e-09	4.76e-08
lnc-LMBRD1-2	357	0	13	0.001	33.9848	15.0526	Up	0.000470676	0.00210578
COLEC10	1703	0	62	0.001	33.9771	15.0523	Up	9.41e-17	4.89e-15
lnc-TRIM26-3	634	0	23	0.001	33.8569	15.0472	Up	1.21e-06	1.09e-05
lnc-SLC27A4-2	1213	0	44	0.001	33.8533	15.047	Up	4.35e-12	1.11e-10
lnc-DRG1-1	662	0	24	0.001	33.8347	15.0462	Up	6.64e-07	6.3e-06
lnc-RIT2-1	414	0	15	0.001	33.8143	15.0453	Up	0.00014269	0.000737673
lnc-CHD1L-4	221	0	8	0.001	33.7837	15.044	Up	0.00930136	0.0273545
lnc-TMEM47-1	553	0	20	0.001	33.7531	15.0427	Up	7.22e-06	5.29e-05
lnc-TFEB-3	610	0	22	0.001	33.6591	15.0387	Up	2.19e-06	1.84e-05
lnc-HPS5-1	222	0	8	0.001	33.6315	15.0375	Up	0.00930136	0.0272787
lnc-THBS2-7	472	0	17	0.001	33.6137	15.0368	Up	4.33e-05	0.000261502
lnc-TXLNB-2	361	0	13	0.001	33.6082	15.0365	Up	0.000470676	0.0021197
lnc-MRTO4-2	306	0	11	0.001	33.5491	15.034	Up	0.00155257	0.00597342
lnc-CCDC90A-5	474	0	17	0.001	33.4718	15.0307	Up	4.33e-05	0.000261406
lnc-NOC4L-2	391	0	14	0.001	33.4165	15.0283	Up	0.000259154	0.00127571
lnc-FAM213B-2	433	0	19	0.001	33.2687	15.0219	Up	1.31e-05	9.06e-05
lnc-PZP-6	533	0	19	0.001	33.2687	15.0219	Up	1.31e-05	8.93e-05
lnc-COMMD8-1	505	0	18	0.001	33.2652	15.0217	Up	2.38e-05	0.000154179
lnc-AMFR-6	449	0	16	0.001	33.257	15.0214	Up	7.86e-05	0.000439024
lnc-GPER-6	534	0	19	0.001	33.2064	15.0192	Up	1.31e-05	8.95e-05
lnc-RCAN2-2	506	0	18	0.001	33.1995	15.0189	Up	2.38e-05	0.000153918
lnc-PGA3-2	366	0	13	0.001	33.1491	15.0167	Up	0.000470676	0.00214397
lnc-CCL1-1	536	0	19	0.001	33.0825	15.0138	Up	1.31e-05	9e-05
lnc-CD38-3	790	0	28	0.001	33.0781	15.0136	Up	6.1e-08	7.25e-07
lnc-NBPF9-5	565	0	20	0.001	33.0362	15.0118	Up	7.22e-06	5.33e-05
lnc-NPC1-4	226	0	8	0.001	33.0362	15.0118	Up	0.00930136	0.0268045
lnc-SRBD1-6	368	0	13	0.001	32.9689	15.0088	Up	0.000470676	0.00214969
lnc-SIRPG-2	425	0	15	0.001	32.9391	15.0075	Up	0.00014269	0.000749913
lnc-RPL27-2	595	0	21	0.001	32.9391	15.0075	Up	3.98e-06	3.14e-05
lnc-SRPX2-1	652	0	23	0.001	32.9222	15.0068	Up	1.21e-06	1.08e-05
lnc-TCF7L2-1	1418	0	50	0.001	32.9081	15.0062	Up	1.21e-13	4.05e-12
lnc-NBPF15-3	227	0	8	0.001	32.8907	15.0054	Up	0.00930136	0.0275533
lnc-C6orf99-7	1284	0	59	0.001	32.8735	15.0046	Up	5.64e-16	2.65e-14
lnc-C15orf58-5	540	0	19	0.001	32.8374	15.0031	Up	1.31e-05	8.99e-05
lnc-ABCC9-1	313	0	11	0.001	32.7988	15.0014	Up	0.00155257	0.00597249
lnc-SEMA5A-2	427	0	15	0.001	32.7848	15.0007	Up	0.00014269	0.000749596
lnc-SLCO1A2-5	1510	0	53	0.001	32.7573	14.9995	Up	2.02e-14	7.61e-13
lnc-ZBTB10-4	285	0	10	0.001	32.7464	14.9991	Up	0.0028198	0.0099449
AP1B1P1	827	0	29	0.001	32.7266	14.9982	Up	3.36e-08	4.19e-07
lnc-C7orf30-5	257	0	9	0.001	32.6827	14.9962	Up	0.00512132	0.0165222
lnc-RP11-934B9.3.1-1	657	0	23	0.001	32.6717	14.9958	Up	1.21e-06	1.07e-05
lnc-PRSS21-2	543	0	19	0.001	32.656	14.9951	Up	1.31e-05	9.05e-05
LOC100996349	486	0	17	0.001	32.6454	14.9946	Up	4.33e-05	0.000263069
lnc-SPDEF-1	286	0	10	0.001	32.6319	14.994	Up	0.0028198	0.00989018
lnc-BTD-1	830	0	29	0.001	32.6084	14.993	Up	3.36e-08	4.18e-07
lnc-TRIM73-2	573	0	20	0.001	32.575	14.9915	Up	7.22e-06	5.35e-05
lnc-FOXA2-9	659	0	23	0.001	32.5725	14.9914	Up	1.21e-06	1.08e-05
lnc-AC006946.15.1-8	373	0	13	0.001	32.527	14.9893	Up	0.000470676	0.00212664
lnc-GADL1-1	419	0	18	0.001	32.4931	14.9878	Up	2.38e-05	0.000153519
lnc-RFPL4A-1	316	0	11	0.001	32.4874	14.9876	Up	0.00155257	0.00591076
lnc-USP35-14	546	0	19	0.001	32.4766	14.9871	Up	1.31e-05	8.91e-05
lnc-GTPBP3-2	661	0	23	0.001	32.474	14.987	Up	1.21e-06	1.09e-05
lnc-BDKRB1-1	460	0	16	0.001	32.4617	14.9865	Up	7.86e-05	0.00044361
lnc-RASAL1-1	575	0	20	0.001	32.4617	14.9865	Up	7.22e-06	5.35e-05
lnc-DTX1-2	374	0	13	0.001	32.44	14.9855	Up	0.000470676	0.00210844
lnc-ZNF853-2	1410	0	49	0.001	32.4329	14.9852	Up	2.2e-13	6.97e-12
lnc-FAM47E-1	634	0	22	0.001	32.3849	14.983	Up	2.19e-06	1.85e-05
lnc-CDR2-3	375	0	13	0.001	32.3535	14.9816	Up	0.000470676	0.0021111
lnc-KAAG1-1	779	0	27	0.001	32.3471	14.9813	Up	1.11e-07	1.25e-06
lnc-ADCY1-2	404	0	14	0.001	32.3412	14.9811	Up	0.000259154	0.00126868
lnc-SHC1-1	433	0	15	0.001	32.3305	14.9806	Up	0.00014269	0.000742303
lnc-AGTPBP1-4	231	0	8	0.001	32.3212	14.9802	Up	0.00930136	0.0275107
lnc-CYB5A-1	1184	0	41	0.001	32.3178	14.98	Up	2.61e-11	5.83e-10
lnc-C1orf198-2	405	0	14	0.001	32.2613	14.9775	Up	0.000259154	0.00127382
lnc-C9orf84-2	319	0	11	0.001	32.1819	14.974	Up	0.00155257	0.00602093
lnc-SOCS7-2	261	0	9	0.001	32.1819	14.974	Up	0.00512132	0.0164922
lnc-TM4SF1-2	377	0	13	0.001	32.1819	14.974	Up	0.000470676	0.00212973
lnc-LIPC-2	1102	0	38	0.001	32.1819	14.974	Up	1.56e-10	3.03e-09
lnc-TUBAL3-1	435	0	15	0.001	32.1819	14.974	Up	0.00014269	0.000739904
lnc-ABI3-1	465	0	16	0.001	32.1126	14.9709	Up	7.86e-05	0.000436229
lnc-NAT9-1	976	0	55	0.001	32.1013	14.9703	Up	6.13e-15	2.49e-13
lnc-AHR-8	551	0	19	0.001	32.0655	14.9687	Up	1.31e-05	8.94e-05
lnc-SLC48A1-6	262	0	9	0.001	32.059	14.9684	Up	0.00512132	0.0166867
lnc-HIVEP1-6	554	0	19	0.001	32.0076	14.9661	Up	1.31e-05	8.97e-05
lnc-CCNL2-2	292	0	10	0.001	31.9614	14.964	Up	0.0028198	0.0100518
lnc-RLBP1-2	292	0	10	0.001	31.9614	14.964	Up	0.0028198	0.00978937
lnc-PRDX6-2	585	0	20	0.001	31.9068	14.9616	Up	7.22e-06	5.36e-05
lnc-RPRD1A-3	644	0	22	0.001	31.882	14.9605	Up	2.19e-06	1.84e-05
lnc-SAP30-17	205	0	7	0.001	31.8679	14.9598	Up	0.0168932	0.0446463
lnc-OR10H5-2	908	0	31	0.001	31.8629	14.9596	Up	1.02e-08	1.41e-07
lnc-TRNP1-5	498	0	17	0.001	31.8587	14.9594	Up	4.33e-05	0.000262235
lnc-AL135998.1-1	498	0	17	0.001	31.8587	14.9594	Up	4.33e-05	0.000259108
lnc-ZFPL1-1	879	0	30	0.001	31.8523	14.9591	Up	1.85e-08	2.42e-07
lnc-EXOC2-18	293	0	10	0.001	31.8523	14.9591	Up	0.0028198	0.00979416
lnc-RP11-382B18.2.1-3	499	0	17	0.001	31.7949	14.9565	Up	4.33e-05	0.000261693
lnc-G0S2-3	1204	0	41	0.001	31.7809	14.9559	Up	2.61e-11	5.84e-10
lnc-G3BP2-1	999	0	36	0.001	31.726	14.9534	Up	5.15e-10	9.28e-09
lnc-CENPV-4	589	0	20	0.001	31.6901	14.9517	Up	7.22e-06	5.36e-05
lnc-HERC1-3	324	0	11	0.001	31.6852	14.9515	Up	0.00155257	0.00605873
lnc-JMJD1C-1	383	0	13	0.001	31.6777	14.9512	Up	0.000470676	0.00213459
lnc-DPY19L4-2	383	0	13	0.001	31.6777	14.9512	Up	0.000470676	0.00211015
lnc-RP1-286D6.2.1-1	295	0	10	0.001	31.6364	14.9493	Up	0.0028198	0.0100504
OR5I1	945	0	32	0.001	31.6029	14.9478	Up	5.61e-09	8.19e-08
lnc-C17orf51-10	325	0	11	0.001	31.5877	14.9471	Up	0.00155257	0.00606111
lnc-CNTFR-1	473	0	16	0.001	31.5695	14.9462	Up	7.86e-05	0.0004355
lnc-ATP6AP1L-7	296	0	10	0.001	31.5295	14.9444	Up	0.0028198	0.0100202
lnc-PHF20L1-4	296	0	10	0.001	31.5295	14.9444	Up	0.0028198	0.00991396
lnc-KIAA1614-1	1480	0	50	0.001	31.5295	14.9444	Up	1.21e-13	4.02e-12
lnc-MTOR-3	237	0	8	0.001	31.5029	14.9432	Up	0.00930136	0.026967
lnc-NXN-6	563	0	19	0.001	31.4959	14.9429	Up	1.31e-05	8.95e-05
lnc-CPLX1-10	563	0	19	0.001	31.4959	14.9429	Up	1.31e-05	8.93e-05
lnc-CCDC37-1	682	0	23	0.001	31.474	14.9419	Up	1.21e-06	1.08e-05
OVOL3	623	0	21	0.001	31.4587	14.9412	Up	3.98e-06	3.13e-05
lnc-LASP1-4	564	0	19	0.001	31.4401	14.9403	Up	1.31e-05	8.98e-05
lnc-ATP8A2-1	772	0	26	0.001	31.4315	14.9399	Up	2.01e-07	2.13e-06
lnc-HNRNPM-2	297	0	10	0.001	31.4234	14.9395	Up	0.0028198	0.00992589
lnc-DGKH-3	208	0	7	0.001	31.4083	14.9389	Up	0.0168932	0.0435786
lnc-RPL22-1	743	0	25	0.001	31.4022	14.9386	Up	3.65e-07	3.67e-06
lnc-DFNB31-1	535	0	18	0.001	31.3999	14.9385	Up	2.38e-05	0.000152806
lnc-ATAD5-4	862	0	29	0.001	31.3978	14.9384	Up	3.36e-08	4.2e-07
lnc-FGL2-4	595	0	20	0.001	31.3705	14.9371	Up	7.22e-06	5.36e-05
lnc-C17orf79-2	476	0	16	0.001	31.3705	14.9371	Up	7.86e-05	0.000440409
lnc-GALNT1-2	2084	0	70	0.001	31.348	14.9361	Up	7.95e-19	5.28e-17
lnc-HAAO-2	1013	0	34	0.001	31.3241	14.935	Up	1.7e-09	2.77e-08
lnc-OBSL1-4	298	0	10	0.001	31.3179	14.9347	Up	0.0028198	0.009981
lnc-AC092031.1-4	775	0	26	0.001	31.3098	14.9343	Up	2.01e-07	2.14e-06
HLA-DPB2	805	0	27	0.001	31.3023	14.934	Up	1.11e-07	1.25e-06
lnc-RNF14-3	686	0	23	0.001	31.2905	14.9334	Up	1.21e-06	1.07e-05
lnc-C3orf65-9	299	0	10	0.001	31.2132	14.9299	Up	0.0028198	0.00977232
lnc-SGCD-2	1017	0	34	0.001	31.2009	14.9293	Up	1.7e-09	2.77e-08
lnc-RALGPS2-1	719	0	24	0.001	31.1524	14.9271	Up	6.64e-07	6.28e-06
lnc-BCAN-2	719	0	24	0.001	31.1524	14.9271	Up	6.64e-07	6.26e-06
lnc-GOLGB1-3	571	0	19	0.001	31.0546	14.9225	Up	1.31e-05	9.05e-05
lnc-ARHGAP23-1	571	0	19	0.001	31.0546	14.9225	Up	1.31e-05	9.04e-05
lnc-ARMC9-1	481	0	16	0.001	31.0444	14.922	Up	7.86e-05	0.000436424
lnc-FAM20C-10	932	0	31	0.001	31.0424	14.922	Up	1.02e-08	1.41e-07
lnc-C5orf22-6	451	0	15	0.001	31.0401	14.9218	Up	0.00014269	0.000750389
lnc-NOC3L-5	421	0	14	0.001	31.0352	14.9216	Up	0.000259154	0.00126036
lnc-LEFTY1-2	722	0	24	0.001	31.0229	14.921	Up	6.64e-07	6.27e-06
lnc-UBE2U-2	1867	0	62	0.001	30.9925	14.9196	Up	9.41e-17	4.88e-15
lnc-TMEM116-6	603	0	20	0.001	30.9544	14.9179	Up	7.22e-06	5.37e-05
lnc-C5orf22-1	543	0	18	0.001	30.9373	14.9171	Up	2.38e-05	0.000155026
lnc-MBOAT1-16	332	0	11	0.001	30.9217	14.9163	Up	0.00155257	0.00605588
lnc-FBXO11-5	332	0	11	0.001	30.9217	14.9163	Up	0.00155257	0.00599056
lnc-IRX1-1	574	0	19	0.001	30.8923	14.915	Up	1.31e-05	8.91e-05
lnc-F11-3	605	0	20	0.001	30.852	14.9131	Up	7.22e-06	5.34e-05
NFKBIL1	1483	0	49	0.001	30.8364	14.9123	Up	2.2e-13	7e-12
lnc-TAF15-1	787	0	26	0.001	30.8324	14.9122	Up	2.01e-07	2.13e-06
lnc-PCP4L1-1	364	0	12	0.001	30.7673	14.9091	Up	0.000854844	0.00360771
lnc-AC074389.6.1-4	637	0	21	0.001	30.7673	14.9091	Up	3.98e-06	3.12e-05
lnc-RALGPS2-2	577	0	19	0.001	30.7317	14.9074	Up	1.31e-05	9.09e-05
lnc-KIDINS220-6	2342	0	77	0.001	30.6841	14.9052	Up	1.22e-20	9.93e-19
lnc-SLC25A14-1	213	0	7	0.001	30.671	14.9046	Up	0.0168932	0.0434209
lnc-NR2F2-11	274	0	9	0.001	30.655	14.9038	Up	0.00512132	0.0166518
lnc-MFSD2A-2	670	0	22	0.001	30.6448	14.9034	Up	2.19e-06	1.83e-05
lnc-ULK2-1	366	0	12	0.001	30.5991	14.9012	Up	0.000854844	0.00351872
lnc-KLHL32-8	1984	0	65	0.001	30.576	14.9001	Up	1.57e-17	9.07e-16
lnc-FASN-1	580	0	19	0.001	30.5728	14.9	Up	1.31e-05	9.09e-05
lnc-SERPINA11-1	580	0	19	0.001	30.5728	14.9	Up	1.31e-05	9.06e-05
lnc-PID1-4	214	0	7	0.001	30.5276	14.8978	Up	0.0168932	0.0444714
lnc-AL138831.1-2	520	0	17	0.001	30.5109	14.897	Up	4.33e-05	0.000261184
lnc-NPBWR1-1	826	0	27	0.001	30.5065	14.8968	Up	1.11e-07	1.26e-06
lnc-TMPRSS15-23	612	0	20	0.001	30.4991	14.8965	Up	7.22e-06	5.32e-05
lnc-GSG1L-7	2481	0	81	0.001	30.4696	14.8951	Up	1.12e-21	1.04e-19
lnc-MMP23B-2	2821	0	92	0.001	30.4364	14.8935	Up	1.58e-24	1.9e-22
lnc-IL17RC-2	553	0	18	0.001	30.3778	14.8907	Up	2.38e-05	0.000155108
lnc-THSD7B-2	553	0	18	0.001	30.3778	14.8907	Up	2.38e-05	0.000154058
lnc-PTK2-4	1415	0	46	0.001	30.3396	14.8889	Up	1.32e-12	3.64e-11
lnc-CTC-236F12.4.1-4	536	0	23	0.001	30.3182	14.8879	Up	1.21e-06	1.07e-05
lnc-PRELID2-4	493	0	16	0.001	30.2888	14.8865	Up	7.86e-05	0.000441404
lnc-MDH1B-5	339	0	11	0.001	30.2832	14.8862	Up	0.00155257	0.0059836
lnc-C10orf126-2	709	0	23	0.001	30.2755	14.8859	Up	1.21e-06	1.07e-05
lnc-RBM27-4	555	0	18	0.001	30.2683	14.8855	Up	2.38e-05	0.000154319
lnc-PKLR-5	555	0	18	0.001	30.2683	14.8855	Up	2.38e-05	0.000154159
IMP4	1049	0	34	0.001	30.2491	14.8846	Up	1.7e-09	2.77e-08
lnc-NFE2L2-6	278	0	9	0.001	30.2139	14.8829	Up	0.00512132	0.0162078
lnc-FAM208B-1	805	0	26	0.001	30.143	14.8795	Up	2.01e-07	2.15e-06
lnc-NTHL1-1	929	0	30	0.001	30.138	14.8793	Up	1.85e-08	2.44e-07
lnc-SUSD2-1	558	0	18	0.001	30.1056	14.8777	Up	2.38e-05	0.000155067
lnc-LAMP5-1	465	0	15	0.001	30.1056	14.8777	Up	0.00014269	0.000747307
lnc-IL5RA-10	279	0	9	0.001	30.1056	14.8777	Up	0.00512132	0.0164912
lnc-POLR2B-12	527	0	17	0.001	30.1056	14.8777	Up	4.33e-05	0.000260646
lnc-ZFP62-3	745	0	24	0.001	30.0652	14.8758	Up	6.64e-07	6.26e-06
lnc-AC016251.1-10	715	0	23	0.001	30.0214	14.8737	Up	1.21e-06	1.08e-05
lnc-VPREB1-4	342	0	11	0.001	30.0176	14.8735	Up	0.00155257	0.00603552
lnc-SPAG16-4	684	0	22	0.001	30.0176	14.8735	Up	2.19e-06	1.83e-05
lnc-VCP-2	592	0	19	0.001	29.953	14.8704	Up	1.31e-05	8.94e-05
lnc-EHD3-2	561	0	18	0.001	29.9446	14.87	Up	2.38e-05	0.00015442
lnc-AJUBA-1	936	0	30	0.001	29.9126	14.8685	Up	1.85e-08	2.44e-07
lnc-FAIM3-1	1030	0	33	0.001	29.901	14.8679	Up	3.09e-09	4.74e-08
lnc-SRCIN1-2	281	0	9	0.001	29.8913	14.8674	Up	0.00512132	0.0162222
lnc-DLD-1	625	0	20	0.001	29.8648	14.8662	Up	7.22e-06	5.35e-05
lnc-CHAC1-2	500	0	16	0.001	29.8648	14.8662	Up	7.86e-05	0.000436619
lnc-CCDC125-3	438	0	14	0.001	29.8307	14.8645	Up	0.000259154	0.00127432
lnc-TRAF3-1	908	0	29	0.001	29.8072	14.8634	Up	3.36e-08	4.19e-07
lnc-DCBLD2-1	877	0	28	0.001	29.7967	14.8629	Up	6.1e-08	7.25e-07
LINC00969	940	0	30	0.001	29.7853	14.8623	Up	1.85e-08	2.43e-07
lnc-RPS19BP1-4	1505	0	48	0.001	29.7655	14.8614	Up	4e-13	1.21e-11
lnc-EMX2-9	816	0	26	0.001	29.7367	14.86	Up	2.01e-07	2.14e-06
lnc-SLC25A6-3	314	0	10	0.001	29.7221	14.8592	Up	0.0028198	0.0099287
lnc-CPPED1-7	314	0	10	0.001	29.7221	14.8592	Up	0.0028198	0.00992518
lnc-SPINK7-1	1225	0	39	0.001	29.7124	14.8588	Up	8.6e-11	1.75e-09
lnc-KLF4-5	597	0	19	0.001	29.7022	14.8583	Up	1.31e-05	9.03e-05
lnc-DNAJC7-2	503	0	16	0.001	29.6866	14.8575	Up	7.86e-05	0.000441654
lnc-ANXA6-4	566	0	18	0.001	29.6801	14.8572	Up	2.38e-05	0.000153758
lnc-TSPYL2-5	283	0	9	0.001	29.6801	14.8572	Up	0.00512132	0.0163724
lnc-NSFL1C-2	441	0	14	0.001	29.6277	14.8547	Up	0.000259154	0.00127685
lnc-RIBC1-3	252	0	8	0.001	29.6277	14.8547	Up	0.00930136	0.0269749
lnc-LRRIQ3-1	252	0	8	0.001	29.6277	14.8547	Up	0.00930136	0.0269387
lnc-CNGB1-3	473	0	15	0.001	29.5964	14.8531	Up	0.00014269	0.000747071
lnc-CPEB2-15	1577	0	50	0.001	29.5902	14.8528	Up	1.21e-13	4.06e-12
lnc-MTRR-13	347	0	11	0.001	29.585	14.8526	Up	0.00155257	0.00604355
lnc-ZEB2-19	1546	0	49	0.001	29.5798	14.8523	Up	2.2e-13	6.98e-12
lnc-TOMM20L-3	316	0	10	0.001	29.534	14.8501	Up	0.0028198	0.00999238
lnc-CAST-6	474	0	15	0.001	29.534	14.8501	Up	0.00014269	0.000746442
lnc-VRK1-6	253	0	8	0.001	29.5106	14.8489	Up	0.00930136	0.0266286
lnc-CPPED1-4	443	0	14	0.001	29.494	14.8481	Up	0.000259154	0.00126012
lnc-CA8-1	380	0	12	0.001	29.4718	14.847	Up	0.000854844	0.00356625
lnc-LINC00207-3	1045	0	33	0.001	29.4718	14.847	Up	3.09e-09	4.74e-08
lnc-USP31-3	381	0	12	0.001	29.3944	14.8433	Up	0.000854844	0.00360925
lnc-ARPC4-1	762	0	24	0.001	29.3944	14.8433	Up	6.64e-07	6.32e-06
lnc-ELP4-4	635	0	20	0.001	29.3944	14.8433	Up	7.22e-06	5.29e-05
lnc-SWT1-5	858	0	27	0.001	29.3688	14.842	Up	1.11e-07	1.24e-06
lnc-TUBB2B-4	445	0	14	0.001	29.3614	14.8416	Up	0.000259154	0.00127837
lnc-CCT5-7	318	0	10	0.001	29.3482	14.841	Up	0.0028198	0.0100396
lnc-APAF1-6	318	0	10	0.001	29.3482	14.841	Up	0.0028198	0.00997035
lnc-ZSCAN2-9	223	0	7	0.001	29.2956	14.8384	Up	0.0168932	0.0440886
lnc-RALB-4	288	0	9	0.001	29.1648	14.8319	Up	0.00512132	0.0164858
lnc-RP11-148O21.2.1-2	544	0	17	0.001	29.1648	14.8319	Up	4.33e-05	0.000260583
lnc-CSMD1-17	448	0	14	0.001	29.1648	14.8319	Up	0.000259154	0.00125815
lnc-SLC4A3-12	416	0	13	0.001	29.1648	14.8319	Up	0.000470676	0.00212066
lnc-SMC1B-2	256	0	8	0.001	29.1648	14.8319	Up	0.00930136	0.0266332
lnc-RHD-4	1344	0	42	0.001	29.1648	14.8319	Up	1.44e-11	3.36e-10
lnc-GRAMD4-4	3205	0	100	0.001	29.1193	14.8297	Up	1.33e-26	1.91e-24
KRTAP29-1	1026	0	32	0.001	29.108	14.8291	Up	5.61e-09	8.22e-08
lnc-TP53-1	513	0	16	0.001	29.108	14.8291	Up	7.86e-05	0.000441504
lnc-MBOAT1-15	385	0	12	0.001	29.0891	14.8282	Up	0.000854844	0.00356595
lnc-SLC22A23-3	1126	0	35	0.001	29.0094	14.8242	Up	9.36e-10	1.6e-08
lnc-UBR2-2	354	0	11	0.001	29	14.8238	Up	0.00155257	0.00597665
lnc-HAO2-1	869	0	27	0.001	28.997	14.8236	Up	1.11e-07	1.26e-06
lnc-ADAMTS14-2	1481	0	46	0.001	28.9876	14.8231	Up	1.32e-12	3.65e-11
lnc-ADRA2C-1	322	0	10	0.001	28.9837	14.823	Up	0.0028198	0.0100475
lnc-PDE7A-4	322	0	10	0.001	28.9837	14.823	Up	0.0028198	0.0100389
lnc-RAC3-1	709	0	22	0.001	28.9591	14.8217	Up	2.19e-06	1.85e-05
lnc-ALAD-1	516	0	16	0.001	28.9387	14.8207	Up	7.86e-05	0.000441554
lnc-FANCF-4	516	0	16	0.001	28.9387	14.8207	Up	7.86e-05	0.00043458
lnc-ACP1-13	549	0	17	0.001	28.8992	14.8187	Up	4.33e-05	0.000259953
POU5F1P5	937	0	29	0.001	28.8847	14.818	Up	3.36e-08	4.22e-07
lnc-ALOX12B-2	517	0	16	0.001	28.8827	14.8179	Up	7.86e-05	0.000441754
lnc-RPS24-7	711	0	22	0.001	28.8777	14.8177	Up	2.19e-06	1.85e-05
lnc-PANK3-1	550	0	17	0.001	28.8466	14.8161	Up	4.33e-05	0.000262395
lnc-C11orf73-4	550	0	17	0.001	28.8466	14.8161	Up	4.33e-05	0.000260868
lnc-FEV-4	453	0	14	0.001	28.8429	14.8159	Up	0.000259154	0.00125913
lnc-GSG1L-1	1069	0	33	0.001	28.8101	14.8143	Up	3.09e-09	4.74e-08
lnc-GCSH-3	227	0	7	0.001	28.7794	14.8127	Up	0.0168932	0.0442535
lnc-FAM65C-4	292	0	9	0.001	28.7653	14.812	Up	0.00512132	0.0164976
lnc-C7orf44-2	325	0	10	0.001	28.7161	14.8096	Up	0.0028198	0.0100612
LILRA5	1365	0	42	0.001	28.7161	14.8096	Up	1.44e-11	3.37e-10
lnc-SERAC1-11	780	0	24	0.001	28.7161	14.8096	Up	6.64e-07	6.24e-06
ASCL3	650	0	20	0.001	28.7161	14.8096	Up	7.22e-06	5.29e-05
lnc-CFTR-1	423	0	13	0.001	28.6822	14.8079	Up	0.000470676	0.00212317
lnc-AC136604.1-5	586	0	18	0.001	28.6671	14.8071	Up	2.38e-05	0.00015344
lnc-ZNF449-6	228	0	7	0.001	28.6531	14.8064	Up	0.0168932	0.0435244
lnc-TXNDC5-4	391	0	12	0.001	28.6427	14.8059	Up	0.000854844	0.00360404
lnc-DDX23-2	424	0	13	0.001	28.6145	14.8045	Up	0.000470676	0.00215364
lnc-NFKBIZ-2	522	0	16	0.001	28.6061	14.804	Up	7.86e-05	0.000438285
lnc-SNRNP48-1	457	0	14	0.001	28.5904	14.8032	Up	0.000259154	0.00127634
lnc-C20orf94-1	1047	0	32	0.001	28.5241	14.7999	Up	5.61e-09	8.17e-08
TNFAIP8L2	1178	0	36	0.001	28.5211	14.7997	Up	5.15e-10	9.31e-09
lnc-SECISBP2L-1	360	0	11	0.001	28.5167	14.7995	Up	0.00155257	0.00591484
lnc-ETFA-3	262	0	8	0.001	28.4969	14.7985	Up	0.00930136	0.0274977
lnc-SEPW1-1	1148	0	35	0.001	28.4535	14.7963	Up	9.36e-10	1.6e-08
lnc-DEPDC4-3	361	0	11	0.001	28.4377	14.7955	Up	0.00155257	0.00590353
lnc-TTC21A-6	394	0	12	0.001	28.4246	14.7949	Up	0.000854844	0.00356535
lnc-CD9-3	394	0	12	0.001	28.4246	14.7949	Up	0.000854844	0.00352836
lnc-BBIP1-8	427	0	13	0.001	28.4135	14.7943	Up	0.000470676	0.00211167
lnc-STAT3-1	855	0	26	0.001	28.3803	14.7926	Up	2.01e-07	2.14e-06
lnc-FARP1-7	296	0	9	0.001	28.3766	14.7924	Up	0.00512132	0.0166073
lnc-DZANK1-6	296	0	9	0.001	28.3766	14.7924	Up	0.00512132	0.0164762
lnc-RYBP-7	362	0	11	0.001	28.3591	14.7915	Up	0.00155257	0.00604261
lnc-FCRL1-1	560	0	17	0.001	28.3315	14.7901	Up	4.33e-05	0.000259295
lnc-C1D-7	725	0	22	0.001	28.32	14.7895	Up	2.19e-06	1.85e-05
lnc-ALPK3-1	429	0	13	0.001	28.281	14.7875	Up	0.000470676	0.00215642
lnc-TLX3-1	231	0	7	0.001	28.281	14.7875	Up	0.0168932	0.0449472
lnc-SRRM3-2	363	0	11	0.001	28.281	14.7875	Up	0.00155257	0.00606254
lnc-VEZT-8	330	0	10	0.001	28.281	14.7875	Up	0.0028198	0.00998313
lnc-KBTBD2-1	264	0	8	0.001	28.281	14.7875	Up	0.00930136	0.0272546
lnc-BUB1B-5	1089	0	33	0.001	28.281	14.7875	Up	3.09e-09	4.74e-08
lnc-RGS6-1	397	0	12	0.001	28.2098	14.7839	Up	0.000854844	0.00355076
lnc-RAP1GDS1-2	364	0	11	0.001	28.2033	14.7836	Up	0.00155257	0.00604545
CD79A	1258	0	38	0.001	28.1911	14.783	Up	1.56e-10	3.05e-09
lnc-VTN-3	596	0	18	0.001	28.1861	14.7827	Up	2.38e-05	0.00015342
lnc-SSTR4-11	265	0	8	0.001	28.1743	14.7821	Up	0.00930136	0.0266454
lnc-CAMTA2-1	431	0	13	0.001	28.1498	14.7808	Up	0.000470676	0.00215483
lnc-MUC20-9	564	0	17	0.001	28.1306	14.7799	Up	4.33e-05	0.000260016
lnc-INO80-3	299	0	9	0.001	28.0919	14.7779	Up	0.00512132	0.0162068
lnc-KTN1-AS1-1	514	0	25	0.001	28.0768	14.7771	Up	3.65e-07	3.66e-06
lnc-RPS6KA1-1	266	0	8	0.001	28.0684	14.7767	Up	0.00930136	0.0269654
lnc-AP2S1-4	532	0	16	0.001	28.0684	14.7767	Up	7.86e-05	0.000435791
lnc-BLM-4	765	0	23	0.001	28.0592	14.7762	Up	1.21e-06	1.07e-05
lnc-C14orf80-1	366	0	11	0.001	28.0492	14.7757	Up	0.00155257	0.00600688
lnc-RAB30-1	433	0	13	0.001	28.0198	14.7742	Up	0.000470676	0.00215344
lnc-RP11-867G23.8.1-6	433	0	13	0.001	28.0198	14.7742	Up	0.000470676	0.0021342
lnc-MAPK1-1	300	0	9	0.001	27.9982	14.773	Up	0.00512132	0.0166453
lnc-NCEH1-2	567	0	17	0.001	27.9818	14.7722	Up	4.33e-05	0.000260205
lnc-ATPBD4-2	652	0	21	0.001	27.9583	14.771	Up	3.98e-06	3.16e-05
lnc-CELSR1-1	434	0	13	0.001	27.9552	14.7708	Up	0.000470676	0.00210749
lnc-RNF113A-1	468	0	14	0.001	27.9184	14.7689	Up	0.000259154	0.00126705
DEFA6	468	0	14	0.001	27.9184	14.7689	Up	0.000259154	0.00125987
lnc-RBMS3-3	1204	0	36	0.001	27.9052	14.7682	Up	5.15e-10	9.31e-09
lnc-PRKCA-1	368	0	11	0.001	27.8968	14.7678	Up	0.00155257	0.00606492
lnc-CTTNBP2-2	435	0	13	0.001	27.8909	14.7675	Up	0.000470676	0.00215008
lnc-C12orf65-2	335	0	10	0.001	27.8589	14.7659	Up	0.0028198	0.0100317
lnc-PTH1R-2	268	0	8	0.001	27.8589	14.7659	Up	0.00930136	0.0272514
lnc-CHCHD7-8	201	0	6	0.001	27.8589	14.7659	Up	0.0306814	0.0725879
lnc-RGS18-10	201	0	6	0.001	27.8589	14.7659	Up	0.0306814	0.0723778
lnc-ZNF827-11	201	0	6	0.001	27.8589	14.7659	Up	0.0306814	0.0721724
lnc-PHGDH-1	537	0	16	0.001	27.807	14.7632	Up	7.86e-05	0.000442204
lnc-AC233264.1-2	235	0	7	0.001	27.7996	14.7628	Up	0.0168932	0.0436646
lnc-RPTOR-1	403	0	12	0.001	27.7898	14.7623	Up	0.000854844	0.00355581
lnc-RGS9-7	1142	0	34	0.001	27.7857	14.7621	Up	1.7e-09	2.75e-08
lnc-AF131215.6.1-2	807	0	24	0.001	27.7554	14.7605	Up	6.64e-07	6.28e-06
lnc-STAU1-4	370	0	11	0.001	27.746	14.76	Up	0.00155257	0.00595499
lnc-DDR1-2	303	0	9	0.001	27.721	14.7587	Up	0.00512132	0.0162616
lnc-AC074389.6.1-3	337	0	10	0.001	27.6936	14.7573	Up	0.0028198	0.00998029
lnc-CHP2.1-2	371	0	11	0.001	27.6712	14.7561	Up	0.00155257	0.00597711
lnc-DNAJB9-5	709	0	20	0.001	27.6526	14.7551	Up	7.22e-06	5.32e-05
lnc-BOD1L-4	405	0	12	0.001	27.6526	14.7551	Up	0.000854844	0.00352339
lnc-GLRB-7	507	0	15	0.001	27.6116	14.753	Up	0.00014269	0.000738902
lnc-IFI27L2-1	676	0	20	0.001	27.6116	14.753	Up	7.22e-06	5.29e-05
lnc-NUMA1-2	541	0	16	0.001	27.6014	14.7525	Up	7.86e-05	0.000436571
lnc-DYNLRB2-8	203	0	6	0.001	27.5844	14.7516	Up	0.0306814	0.0735856
lnc-PRR14-5	203	0	6	0.001	27.5844	14.7516	Up	0.0306814	0.0733839
lnc-ZNF83-2	644	0	19	0.001	27.5345	14.749	Up	1.31e-05	8.97e-05
lnc-SERTAD1-1	475	0	14	0.001	27.507	14.7475	Up	0.000259154	0.0012568
PCBD2	2378	0	70	0.001	27.4723	14.7457	Up	7.95e-19	5.27e-17
lnc-MAS1L-1	238	0	7	0.001	27.4492	14.7445	Up	0.0168932	0.043964
lnc-ANKRD36C-7	238	0	7	0.001	27.4492	14.7445	Up	0.0168932	0.0436715
lnc-GNL3-2	238	0	7	0.001	27.4492	14.7445	Up	0.0168932	0.0436216
lnc-RP11-603J24.9.1-3	306	0	9	0.001	27.4492	14.7445	Up	0.00512132	0.0162585
lnc-KIAA1267-3	1190	0	35	0.001	27.4492	14.7445	Up	9.36e-10	1.6e-08
lnc-MSRB3-1	443	0	13	0.001	27.3873	14.7412	Up	0.000470676	0.00215443
lnc-PLCXD3-1	1671	0	49	0.001	27.3671	14.7402	Up	2.2e-13	7.01e-12
lnc-KANK4-2	307	0	9	0.001	27.3598	14.7398	Up	0.00512132	0.0163756
lnc-STX8-5	581	0	17	0.001	27.3075	14.737	Up	4.33e-05	0.00026294
MTRNR2L4	1231	0	36	0.001	27.2931	14.7363	Up	5.15e-10	9.27e-09
lnc-RP11-45H22.3.1-3	479	0	14	0.001	27.2773	14.7354	Up	0.000259154	0.00126843
lnc-TLR2-2	308	0	9	0.001	27.271	14.7351	Up	0.00512132	0.0164454
lnc-ZNF487P-3	1028	0	30	0.001	27.2356	14.7332	Up	1.85e-08	2.45e-07
lnc-TARBP1-9	377	0	11	0.001	27.2308	14.733	Up	0.00155257	0.00601436
lnc-TSHZ1-5	343	0	10	0.001	27.2091	14.7318	Up	0.0028198	0.009834
RGR	1475	0	43	0.001	27.2073	14.7317	Up	7.9e-12	1.95e-10
lnc-SETD7-4	309	0	9	0.001	27.1827	14.7304	Up	0.00512132	0.0166584
lnc-CRB2-1	722	0	21	0.001	27.1451	14.7284	Up	3.98e-06	3.12e-05
lnc-TOB1-3	516	0	15	0.001	27.1301	14.7276	Up	0.00014269	0.000750072
lnc-KLF5-4	448	0	13	0.001	27.0816	14.725	Up	0.000470676	0.00213751
lnc-EPB42-3	448	0	13	0.001	27.0816	14.725	Up	0.000470676	0.0021073
lnc-IL1RN-3	586	0	17	0.001	27.0745	14.7246	Up	4.33e-05	0.000260331
CYB5A	862	0	25	0.001	27.0671	14.7243	Up	3.65e-07	3.65e-06
lnc-NCOA3-13	276	0	8	0.001	27.0514	14.7234	Up	0.00930136	0.0268761
lnc-OLFM3-4	1829	0	53	0.001	27.044	14.723	Up	2.02e-14	7.62e-13
lnc-KATNAL2-2	1935	0	56	0.001	27.0095	14.7212	Up	3.38e-15	1.42e-13
lnc-SMTNL1-1	242	0	7	0.001	26.9955	14.7204	Up	0.0168932	0.0436556
lnc-SF3B1-2	865	0	25	0.001	26.9732	14.7192	Up	3.65e-07	3.69e-06
lnc-RPP40-5	450	0	13	0.001	26.9612	14.7186	Up	0.000470676	0.00213439
lnc-GOLGB1-1	450	0	13	0.001	26.9612	14.7186	Up	0.000470676	0.00212722
lnc-TNFSF9-3	727	0	21	0.001	26.9584	14.7184	Up	3.98e-06	3.16e-05
lnc-ORMDL3-2	277	0	8	0.001	26.9538	14.7182	Up	0.00930136	0.027532
lnc-FASTKD3-5	208	0	6	0.001	26.9214	14.7165	Up	0.0306814	0.0737101
lnc-CCT5-23	208	0	6	0.001	26.9214	14.7165	Up	0.0306814	0.0722408
lnc-FGF21-3	312	0	9	0.001	26.9214	14.7165	Up	0.00512132	0.016342
lnc-FAM173B-3	243	0	7	0.001	26.8844	14.7145	Up	0.0168932	0.0436284
lnc-INSIG2-3	243	0	7	0.001	26.8844	14.7145	Up	0.0168932	0.0435221
lnc-GSTM5-2	2535	0	73	0.001	26.8753	14.714	Up	1.33e-19	9.56e-18
PSENEN	834	0	24	0.001	26.8568	14.713	Up	6.64e-07	6.25e-06
lnc-EMP1-1	313	0	9	0.001	26.8353	14.7118	Up	0.00512132	0.0166355
OR6X1	939	0	27	0.001	26.8353	14.7118	Up	1.11e-07	1.24e-06
lnc-GUSB-9	1393	0	40	0.001	26.799	14.7099	Up	4.73e-11	1.01e-09
VN1R4	906	0	26	0.001	26.7827	14.709	Up	2.01e-07	2.14e-06
lnc-DNAJC6-3	349	0	10	0.001	26.7414	14.7068	Up	0.0028198	0.0100331
lnc-MCTP2-17	384	0	11	0.001	26.7344	14.7064	Up	0.00155257	0.00598128
lnc-FLCN-1	384	0	11	0.001	26.7344	14.7064	Up	0.00155257	0.0059385
lnc-IKZF1-8	1187	0	34	0.001	26.7324	14.7063	Up	1.7e-09	2.76e-08
lnc-C8orf34-2	454	0	13	0.001	26.7237	14.7058	Up	0.000470676	0.00214752
lnc-AC008132.13.1-3	524	0	15	0.001	26.7159	14.7054	Up	0.00014269	0.000738979
lnc-ANKRD46-4	210	0	6	0.001	26.665	14.7027	Up	0.0306814	0.0729105
lnc-ZNF507-8	560	0	16	0.001	26.665	14.7027	Up	7.86e-05	0.000436083
lnc-MRPL38-1	385	0	11	0.001	26.665	14.7027	Up	0.00155257	0.00589047
lnc-SECISBP2-2	456	0	13	0.001	26.6065	14.6995	Up	0.000470676	0.0021426
lnc-C14orf49-2	456	0	13	0.001	26.6065	14.6995	Up	0.000470676	0.00210389
lnc-TP53RK-2	351	0	10	0.001	26.589	14.6985	Up	0.0028198	0.0100778
lnc-CHST10-1	562	0	16	0.001	26.5701	14.6975	Up	7.86e-05	0.000441904
lnc-LYSMD4-4	562	0	16	0.001	26.5701	14.6975	Up	7.86e-05	0.000441305
lnc-CNTNAP5-1	527	0	15	0.001	26.5638	14.6972	Up	0.00014269	0.000750865
lnc-C15orf24-3	246	0	7	0.001	26.5566	14.6968	Up	0.0168932	0.0444055
lnc-HERPUD2-1	1091	0	31	0.001	26.5183	14.6947	Up	1.02e-08	1.41e-07
lnc-SNX11-4	704	0	20	0.001	26.5135	14.6944	Up	7.22e-06	5.37e-05
lnc-OR4C13-7	620	0	23	0.001	26.5004	14.6937	Up	1.21e-06	1.07e-05
lnc-ZNF536-6	529	0	15	0.001	26.4633	14.6917	Up	0.00014269	0.000747858
lnc-SLC38A8-1	388	0	11	0.001	26.4588	14.6915	Up	0.00155257	0.00599243
lnc-FGF23-1	495	0	14	0.001	26.3956	14.688	Up	0.000259154	0.00124924
lnc-PEX26-5	672	0	19	0.001	26.3872	14.6876	Up	1.31e-05	9.04e-05
lnc-SETD4-9	354	0	10	0.001	26.3637	14.6863	Up	0.0028198	0.0100873
lnc-BTNL3-2	885	0	25	0.001	26.3637	14.6863	Up	3.65e-07	3.65e-06
lnc-MRPS5-9	354	0	10	0.001	26.3637	14.6863	Up	0.0028198	0.00986305
lnc-PSMD7-2	567	0	16	0.001	26.3358	14.6847	Up	7.86e-05	0.000442755
lnc-RLTPR-1	638	0	18	0.001	26.3306	14.6845	Up	2.38e-05	0.000152846
lnc-C9orf68-4	390	0	11	0.001	26.3231	14.684	Up	0.00155257	0.0060535
lnc-TBL1XR1-6	1243	0	35	0.001	26.2788	14.6816	Up	9.36e-10	1.59e-08
lnc-SLC25A47-3	533	0	15	0.001	26.2647	14.6808	Up	0.00014269	0.000743081
lnc-RET-2	462	0	13	0.001	26.2609	14.6806	Up	0.000470676	0.00215166
lnc-SLC47A1-5	1031	0	29	0.001	26.2512	14.6801	Up	3.36e-08	4.22e-07
lnc-KLF13-2	785	0	25	0.001	26.245	14.6798	Up	3.65e-07	3.64e-06
SELK	818	0	23	0.001	26.2412	14.6795	Up	1.21e-06	1.08e-05
lnc-AC079341.1-7	427	0	12	0.001	26.2278	14.6788	Up	0.000854844	0.00359368
lnc-LSM6-1	605	0	17	0.001	26.2242	14.6786	Up	4.33e-05	0.00025889
lnc-DCTD-8	285	0	8	0.001	26.1972	14.6771	Up	0.00930136	0.0275665
lnc-CHST3-2	285	0	8	0.001	26.1972	14.6771	Up	0.00930136	0.0266148
lnc-PHTF2-5	499	0	14	0.001	26.184	14.6764	Up	0.000259154	0.00127672
lnc-ROCK2-1	1248	0	35	0.001	26.1735	14.6758	Up	9.36e-10	1.6e-08
lnc-MCM4-1	214	0	6	0.001	26.1666	14.6754	Up	0.0306814	0.0717313
lnc-CDYL-13	1142	0	32	0.001	26.1513	14.6746	Up	5.61e-09	8.21e-08
lnc-PPP6R3-2	464	0	13	0.001	26.1478	14.6744	Up	0.000470676	0.00210465
lnc-IL17RA-3	500	0	14	0.001	26.1317	14.6735	Up	0.000259154	0.00126061
lnc-ATP5I-5	1037	0	29	0.001	26.0993	14.6717	Up	3.36e-08	4.19e-07
EDDM3B	896	0	25	0.001	26.04	14.6684	Up	3.65e-07	3.69e-06
lnc-HEATR6-1	466	0	13	0.001	26.0355	14.6682	Up	0.000470676	0.00210313
BACE1-AS	825	0	23	0.001	26.0185	14.6673	Up	1.21e-06	1.07e-05
lnc-FUNDC1-1	287	0	8	0.001	26.0146	14.667	Up	0.00930136	0.0271921
lnc-KAT7-4	575	0	16	0.001	25.9694	14.6645	Up	7.86e-05	0.000435937
lnc-FBXW7-4	755	0	21	0.001	25.9586	14.6639	Up	3.98e-06	3.15e-05
lnc-FJX1-1	791	0	22	0.001	25.957	14.6638	Up	2.19e-06	1.83e-05
lnc-ZFP90-2	899	0	25	0.001	25.9531	14.6636	Up	3.65e-07	3.67e-06
lnc-NR2E1-2	432	0	12	0.001	25.9243	14.662	Up	0.000854844	0.00358278
lnc-NYAP1-3	216	0	6	0.001	25.9243	14.662	Up	0.0306814	0.0721963
lnc-GBE1-10	288	0	8	0.001	25.9243	14.662	Up	0.00930136	0.0269419
lnc-KDM4C-14	756	0	21	0.001	25.9243	14.662	Up	3.98e-06	3.14e-05
lnc-RPS9-2	253	0	7	0.001	25.8218	14.6563	Up	0.0168932	0.0434097
lnc-PHYHD1-3	470	0	13	0.001	25.814	14.6559	Up	0.000470676	0.00212278
lnc-C17orf56-2	1627	0	45	0.001	25.8127	14.6558	Up	2.4e-12	6.38e-11
lnc-TMEM194B-2	217	0	6	0.001	25.8048	14.6554	Up	0.0306814	0.0721485
lnc-TACR2-1	434	0	12	0.001	25.8048	14.6554	Up	0.000854844	0.00354218
lnc-ATP6V1E1-2	832	0	23	0.001	25.7996	14.6551	Up	1.21e-06	1.08e-05
lnc-OSBPL1A-2	507	0	14	0.001	25.7709	14.6535	Up	0.000259154	0.00126221
OR6Y1	978	0	27	0.001	25.7652	14.6531	Up	1.11e-07	1.24e-06
lnc-RP11-503N18.3.1-7	616	0	17	0.001	25.7559	14.6526	Up	4.33e-05	0.000262908
lnc-PML-2	725	0	20	0.001	25.7455	14.652	Up	7.22e-06	5.38e-05
lnc-LRRTM1-11	580	0	16	0.001	25.7455	14.652	Up	7.86e-05	0.000438925
lnc-TRIM74-4	290	0	8	0.001	25.7455	14.652	Up	0.00930136	0.0269859
lnc-TNFRSF17-3	435	0	12	0.001	25.7455	14.652	Up	0.000854844	0.00353746
lnc-EBF3-11	472	0	13	0.001	25.7046	14.6497	Up	0.000470676	0.00213869
lnc-NAP1L3-9	1162	0	32	0.001	25.7012	14.6495	Up	5.61e-09	8.2e-08
lnc-MPP7-1	327	0	9	0.001	25.6864	14.6487	Up	0.00512132	0.0164326
lnc-AC079341.1-9	436	0	12	0.001	25.6864	14.6487	Up	0.000854844	0.00351901
lnc-KIF12-1	400	0	11	0.001	25.665	14.6475	Up	0.00155257	0.00606349
lnc-IVNS1ABP-1	400	0	11	0.001	25.665	14.6475	Up	0.00155257	0.00596419
lnc-LARS-1	582	0	16	0.001	25.657	14.6471	Up	7.86e-05	0.000441454
lnc-PPM1D-3	291	0	8	0.001	25.657	14.6471	Up	0.00930136	0.0268605
ATP6V0CP3	619	0	17	0.001	25.6311	14.6456	Up	4.33e-05	0.000261058
HIST1H2BI	437	0	12	0.001	25.6277	14.6454	Up	0.000854844	0.00357495
lnc-FBXO8-5	1824	0	50	0.001	25.5832	14.6429	Up	1.21e-13	4.04e-12
RAB42	1133	0	31	0.001	25.5353	14.6402	Up	1.02e-08	1.42e-07
lnc-KCNAB2-2	951	0	26	0.001	25.5154	14.6391	Up	2.01e-07	2.14e-06
lnc-PCDH18-9	439	0	12	0.001	25.5109	14.6388	Up	0.000854844	0.00354336
lnc-NEUROD2-1	988	0	27	0.001	25.5044	14.6385	Up	1.11e-07	1.25e-06
lnc-GGA2-3	293	0	8	0.001	25.4819	14.6372	Up	0.00930136	0.027157
lnc-SYF2-4	989	0	27	0.001	25.4787	14.637	Up	1.11e-07	1.26e-06
lnc-XYLT1-3	220	0	6	0.001	25.4529	14.6355	Up	0.0306814	0.0735147
lnc-WDTC1-3	220	0	6	0.001	25.4529	14.6355	Up	0.0306814	0.0730326
lnc-HNRNPH3-4	330	0	9	0.001	25.4529	14.6355	Up	0.00512132	0.016489
lnc-CBY3-2	1100	0	30	0.001	25.4529	14.6355	Up	1.85e-08	2.44e-07
lnc-LPP-1	698	0	19	0.001	25.4043	14.6328	Up	1.31e-05	8.94e-05
lnc-E2F7-1	368	0	10	0.001	25.3607	14.6303	Up	0.0028198	0.0100641
lnc-NRP1-4	552	0	15	0.001	25.3607	14.6303	Up	0.00014269	0.000739981
lnc-CD83-5	1141	0	31	0.001	25.3563	14.6301	Up	1.02e-08	1.41e-07
lnc-FMNL3-1	405	0	11	0.001	25.3482	14.6296	Up	0.00155257	0.00593302
lnc-CYP3A43-5	442	0	12	0.001	25.3377	14.629	Up	0.000854844	0.00360526
lnc-C1orf145-4	442	0	12	0.001	25.3377	14.629	Up	0.000854844	0.00354425
lnc-PGGT1B-5	295	0	8	0.001	25.3091	14.6274	Up	0.00930136	0.0275747
lnc-LHCGR-3	332	0	9	0.001	25.2996	14.6268	Up	0.00512132	0.0164189
lnc-CD44-2	518	0	14	0.001	25.2236	14.6225	Up	0.000259154	0.00127407
lnc-MOGAT2-2	296	0	8	0.001	25.2236	14.6225	Up	0.00930136	0.0273497
lnc-TBL1X-4	222	0	6	0.001	25.2236	14.6225	Up	0.0306814	0.0732078
lnc-MINA-10	296	0	8	0.001	25.2236	14.6225	Up	0.00930136	0.0272145
lnc-GAPT-4	222	0	6	0.001	25.2236	14.6225	Up	0.0306814	0.0723847
lnc-LIN28A-2	297	0	8	0.001	25.1387	14.6176	Up	0.00930136	0.027173
lnc-GSDMC-4	520	0	14	0.001	25.1266	14.6169	Up	0.000259154	0.00125643
lnc-PIK3C3-6	743	0	20	0.001	25.1218	14.6167	Up	7.22e-06	5.32e-05
lnc-C4orf52-1	483	0	13	0.001	25.1192	14.6165	Up	0.000470676	0.00213771
lnc-FSHB-9	1673	0	45	0.001	25.103	14.6156	Up	2.4e-12	6.4e-11
lnc-C2CD2-1	447	0	12	0.001	25.0543	14.6128	Up	0.000854844	0.0035567
lnc-RP1-27O5.3.1-1	298	0	8	0.001	25.0543	14.6128	Up	0.00930136	0.0269152
lnc-SPRYD7-4	559	0	15	0.001	25.0431	14.6121	Up	0.00014269	0.000745266
lnc-FZR1-4	522	0	14	0.001	25.0303	14.6114	Up	0.000259154	0.00126818
lnc-RNF13-2	557	0	14	0.001	25.0303	14.6114	Up	0.000259154	0.00126172
lnc-CLMP-7	373	0	10	0.001	25.0207	14.6108	Up	0.0028198	0.00999522
lnc-VAX2-5	373	0	10	0.001	25.0207	14.6108	Up	0.0028198	0.00987903
lnc-AC008686.1-6	373	0	10	0.001	25.0207	14.6108	Up	0.0028198	0.00983814
lnc-CXCL16-2	597	0	16	0.001	25.0124	14.6104	Up	7.86e-05	0.000439419
lnc-CTD-2144E22.5.1-12	224	0	6	0.001	24.9984	14.6095	Up	0.0306814	0.0731552
lnc-SSTR2-6	224	0	6	0.001	24.9984	14.6095	Up	0.0306814	0.0723538
lnc-WRNIP1-30	1719	0	46	0.001	24.9742	14.6081	Up	1.32e-12	3.63e-11
lnc-AC105020.1-2	299	0	8	0.001	24.9705	14.6079	Up	0.00930136	0.0273513
lnc-ZFP90-1	374	0	10	0.001	24.9538	14.607	Up	0.0028198	0.00989437
LRRC52	1122	0	30	0.001	24.9538	14.607	Up	1.85e-08	2.43e-07
lnc-MAPK6-6	823	0	22	0.001	24.9478	14.6066	Up	2.19e-06	1.84e-05
lnc-POLD3-8	449	0	12	0.001	24.9427	14.6063	Up	0.000854844	0.00360832
lnc-RP11-19E11.1.1-3	449	0	12	0.001	24.9427	14.6063	Up	0.000854844	0.00351436
lnc-TLE1-2	524	0	14	0.001	24.9348	14.6059	Up	0.000259154	0.00126668
YAE1D1	899	0	24	0.001	24.915	14.6047	Up	6.64e-07	6.28e-06
lnc-LGI2-4	487	0	13	0.001	24.9129	14.6046	Up	0.000470676	0.00213226
lnc-POLR1A-4	225	0	6	0.001	24.8873	14.6031	Up	0.0306814	0.0713689
lnc-DLL1-4	375	0	10	0.001	24.8873	14.6031	Up	0.0028198	0.00977913
lnc-TNFRSF21-1	338	0	9	0.001	24.8505	14.601	Up	0.00512132	0.0165512
OR51A7	939	0	25	0.001	24.8475	14.6008	Up	3.65e-07	3.66e-06
lnc-MMP10-1	1127	0	30	0.001	24.8431	14.6006	Up	1.85e-08	2.43e-07
lnc-COMMD2-1	451	0	12	0.001	24.8321	14.5999	Up	0.000854844	0.00358127
lnc-CLDN12-2	639	0	17	0.001	24.8289	14.5997	Up	4.33e-05	0.000259514
lnc-VRTN-1	376	0	10	0.001	24.8211	14.5993	Up	0.0028198	0.00980718
lnc-AC079135.1.1-1	489	0	13	0.001	24.811	14.5987	Up	0.000470676	0.00211053
lnc-CTTNBP2NL-3	301	0	8	0.001	24.8046	14.5983	Up	0.00930136	0.0270158
lnc-SIGLEC9-4	527	0	14	0.001	24.7929	14.5976	Up	0.000259154	0.00125545
lnc-MAP1LC3B-3	452	0	12	0.001	24.7772	14.5967	Up	0.000854844	0.0036019
lnc-AL137798.1-1	339	0	9	0.001	24.7772	14.5967	Up	0.00512132	0.016403
lnc-ATP6V0E2-4	678	0	18	0.001	24.7772	14.5967	Up	2.38e-05	0.00015259
lnc-KCTD1-2	603	0	16	0.001	24.7635	14.5959	Up	7.86e-05	0.000443257
lnc-DNAJB4-2	264	0	7	0.001	24.7459	14.5949	Up	0.0168932	0.044739
lnc-FBXL14-2	2037	0	54	0.001	24.7407	14.5946	Up	1.11e-14	4.35e-13
lnc-ADSS-1	642	0	17	0.001	24.7129	14.593	Up	4.33e-05	0.000260994
lnc-SUMF2-11	340	0	9	0.001	24.7043	14.5925	Up	0.00512132	0.0166846
lnc-LRRN1-2	1550	0	41	0.001	24.6866	14.5914	Up	2.61e-11	5.82e-10
lnc-RP11-82I10.1.1-11	454	0	12	0.001	24.668	14.5904	Up	0.000854844	0.00359672
lnc-ZNF337-1	530	0	14	0.001	24.6525	14.5894	Up	0.000259154	0.00127824
lnc-TLR5-1	568	0	15	0.001	24.6463	14.5891	Up	0.00014269	0.000744094
lnc-CREBZF-1	417	0	11	0.001	24.6187	14.5875	Up	0.00155257	0.00590128
lnc-SHC3-3	455	0	12	0.001	24.6138	14.5872	Up	0.000854844	0.00358218
SEPHS2	2351	0	62	0.001	24.6121	14.5871	Up	9.41e-17	4.89e-15
lnc-FANCM-4	645	0	17	0.001	24.5979	14.5862	Up	4.33e-05	0.000262587
lnc-RLBP1-4	949	0	25	0.001	24.5857	14.5855	Up	3.65e-07	3.68e-06
lnc-RP11-77K12.1.1-1	380	0	10	0.001	24.5598	14.584	Up	0.0028198	0.0098582
lnc-EFR3B-5	1141	0	30	0.001	24.5383	14.5827	Up	1.85e-08	2.42e-07
lnc-CDH9-1	685	0	18	0.001	24.524	14.5819	Up	2.38e-05	0.000153938
lnc-FPGS-2	1105	0	29	0.001	24.4932	14.5801	Up	3.36e-08	4.19e-07
lnc-ARL4C-9	343	0	9	0.001	24.4882	14.5798	Up	0.00512132	0.016364
lnc-NOVA1-11	267	0	7	0.001	24.4679	14.5786	Up	0.0168932	0.0446819
lnc-SLC4A3-1	496	0	13	0.001	24.4608	14.5782	Up	0.000470676	0.00212702
lnc-CEP89-2	497	0	13	0.001	24.4116	14.5753	Up	0.000470676	0.00214515
lnc-AC145676.2.1-1	574	0	15	0.001	24.3887	14.5739	Up	0.00014269	0.000747779
lnc-REG3A-4	1225	0	32	0.001	24.3794	14.5734	Up	5.61e-09	8.21e-08
lnc-DHRS3-1	345	0	9	0.001	24.3463	14.5714	Up	0.00512132	0.01652
lnc-PAM-7	307	0	8	0.001	24.3198	14.5698	Up	0.00930136	0.0269168
lnc-CSNK1A1L-2	307	0	8	0.001	24.3198	14.5698	Up	0.00930136	0.0268014
lnc-MBOAT1-11	307	0	8	0.001	24.3198	14.5698	Up	0.00930136	0.026707
lnc-ZNF813-3	578	0	12	0.001	24.2935	14.5683	Up	0.000854844	0.00355879
lnc-SEPW1-5	500	0	13	0.001	24.2651	14.5666	Up	0.000470676	0.00214143
lnc-NCALD-3	539	0	14	0.001	24.2409	14.5652	Up	0.000259154	0.00125191
lnc-ATP8B3-3	655	0	17	0.001	24.2224	14.5641	Up	4.33e-05	0.000261279
lnc-FHL2-2	424	0	11	0.001	24.2123	14.5635	Up	0.00155257	0.00606444
lnc-DSCR3-3	347	0	9	0.001	24.2059	14.5631	Up	0.00512132	0.0163231
lnc-ARHGAP19-2	270	0	7	0.001	24.196	14.5625	Up	0.0168932	0.0443212
lnc-SOX21-4	463	0	12	0.001	24.1885	14.562	Up	0.000854844	0.0035354
lnc-B4GALNT3-5	502	0	13	0.001	24.1684	14.5608	Up	0.000470676	0.00215087
lnc-CPLX1-11	2047	0	53	0.001	24.1639	14.5606	Up	2.02e-14	7.58e-13
lnc-CMAHP-4	927	0	24	0.001	24.1624	14.5605	Up	6.64e-07	6.31e-06
lnc-RNF146-1	619	0	16	0.001	24.1234	14.5581	Up	7.86e-05	0.000441604
lnc-M6PR-5	658	0	17	0.001	24.1119	14.5575	Up	4.33e-05	0.000258361
lnc-STK17A-4	310	0	8	0.001	24.0845	14.5558	Up	0.00930136	0.0266439
lnc-DNAH8-6	1436	0	37	0.001	24.0467	14.5536	Up	2.84e-10	5.33e-09
lnc-TUBB2B-8	1126	0	29	0.001	24.0364	14.5529	Up	3.36e-08	4.2e-07
CARD17	466	0	12	0.001	24.0328	14.5527	Up	0.000854844	0.0035161
lnc-MITF-7	272	0	7	0.001	24.0181	14.5518	Up	0.0168932	0.0434703
lnc-TSR2-7	739	0	19	0.001	23.9949	14.5504	Up	1.31e-05	8.97e-05
UPK2	934	0	24	0.001	23.9813	14.5496	Up	6.64e-07	6.29e-06
lnc-RMI2-4	934	0	24	0.001	23.9813	14.5496	Up	6.64e-07	6.27e-06
CCKBR	2183	0	56	0.001	23.9411	14.5472	Up	3.38e-15	1.42e-13
lnc-PRDM12-1	585	0	15	0.001	23.9301	14.5465	Up	0.00014269	0.000744797
lnc-MERTK-1	820	0	21	0.001	23.9009	14.5448	Up	3.98e-06	3.15e-05
lnc-RHOU-5	547	0	14	0.001	23.8863	14.5439	Up	0.000259154	0.001279
lnc-KIAA1429-3	430	0	11	0.001	23.8744	14.5432	Up	0.00155257	0.00592528
lnc-BPHL-2	821	0	21	0.001	23.8718	14.543	Up	3.98e-06	3.15e-05
lnc-ERGIC2-1	274	0	7	0.001	23.8428	14.5413	Up	0.0168932	0.044708
lnc-DHX15-4	548	0	14	0.001	23.8428	14.5413	Up	0.000259154	0.00125435
lnc-ENOSF1-3	1605	0	41	0.001	23.8406	14.5411	Up	2.61e-11	5.8e-10
lnc-RP11-366K18.3.1-1	2114	0	54	0.001	23.8395	14.5411	Up	1.11e-14	4.34e-13
lnc-MCPH1-7	1253	0	32	0.001	23.8346	14.5408	Up	5.61e-09	8.18e-08
lnc-VSX2-2	235	0	6	0.001	23.8283	14.5404	Up	0.0306814	0.0724053
lnc-DYRK1A-3	235	0	6	0.001	23.8283	14.5404	Up	0.0306814	0.0714893
lnc-GRAMD1B-1	666	0	17	0.001	23.8223	14.54	Up	4.33e-05	0.000262812
lnc-RPS4Y1-7	588	0	15	0.001	23.808	14.5392	Up	0.00014269	0.000749438
NDUFB5	1059	0	27	0.001	23.7945	14.5383	Up	1.11e-07	1.25e-06
lnc-ATP6V1G1-1	471	0	12	0.001	23.7777	14.5373	Up	0.000854844	0.00360588
TRHR	1414	0	36	0.001	23.7609	14.5363	Up	5.15e-10	9.23e-09
lnc-ANKRD57-2	393	0	10	0.001	23.7474	14.5355	Up	0.0028198	0.00978733
lnc-PHF14-8	669	0	17	0.001	23.7155	14.5335	Up	4.33e-05	0.000258796
lnc-PREX1-6	551	0	14	0.001	23.7129	14.5334	Up	0.000259154	0.00124647
lnc-C3orf43-1	945	0	24	0.001	23.7022	14.5327	Up	6.64e-07	6.32e-06
lnc-SLC2A3-3	315	0	8	0.001	23.7022	14.5327	Up	0.00930136	0.0268029
lnc-ZNF680-12	315	0	8	0.001	23.7022	14.5327	Up	0.00930136	0.026624
lnc-C22orf32-4	512	0	13	0.001	23.6964	14.5324	Up	0.000470676	0.00215562
lnc-CRYBA4-5	473	0	12	0.001	23.6771	14.5312	Up	0.000854844	0.00357795
lnc-C16orf95-4	276	0	7	0.001	23.67	14.5308	Up	0.0168932	0.0440701
lnc-NAALADL2-2	276	0	7	0.001	23.67	14.5308	Up	0.0168932	0.0440424
lnc-POU3F4-3	237	0	6	0.001	23.6272	14.5282	Up	0.0306814	0.0721076
lnc-TRIM29-6	553	0	14	0.001	23.6272	14.5282	Up	0.000259154	0.00125228
lnc-TGFBR3-1	2055	0	52	0.001	23.6157	14.5275	Up	3.68e-14	1.31e-12
lnc-BPI-1	277	0	7	0.001	23.5845	14.5256	Up	0.0168932	0.0446012
lnc-C6orf58-4	554	0	14	0.001	23.5845	14.5256	Up	0.000259154	0.0012713
lnc-NFATC1-1	554	0	14	0.001	23.5845	14.5256	Up	0.000259154	0.0012557
lnc-SSPN-1	475	0	12	0.001	23.5774	14.5251	Up	0.000854844	0.00356266
lnc-CDK5RAP1-2	396	0	10	0.001	23.5675	14.5245	Up	0.0028198	0.00979143
lnc-TGFBR2-2	436	0	11	0.001	23.5459	14.5232	Up	0.00155257	0.00597804
lnc-SLC24A5-3	555	0	14	0.001	23.542	14.523	Up	0.000259154	0.0012642
MRPL45	1705	0	43	0.001	23.5371	14.5226	Up	7.9e-12	1.95e-10
lnc-METTL9-1	238	0	6	0.001	23.5279	14.5221	Up	0.0306814	0.0732324
lnc-RGPD3-5	1547	0	39	0.001	23.5279	14.5221	Up	8.6e-11	1.75e-09
C20orf195	1111	0	28	0.001	23.5209	14.5217	Up	6.1e-08	7.22e-07
ATP13A5-AS1	635	0	16	0.001	23.5156	14.5213	Up	7.86e-05	0.000438974
lnc-COLEC12-3	397	0	10	0.001	23.5082	14.5209	Up	0.0028198	0.00993785
lnc-RBPMS-2	318	0	8	0.001	23.4786	14.5191	Up	0.00930136	0.0274162
lnc-OR6C65-1	358	0	9	0.001	23.4622	14.518	Up	0.00512132	0.0164752
lnc-MNS1-10	358	0	9	0.001	23.4622	14.518	Up	0.00512132	0.0162949
lnc-NMT1-2	557	0	14	0.001	23.4575	14.5178	Up	0.000259154	0.0012632
lnc-PILRB-1	557	0	14	0.001	23.4575	14.5178	Up	0.000259154	0.00124683
lnc-SHCBP1L-1	2069	0	52	0.001	23.4559	14.5177	Up	3.68e-14	1.32e-12
lnc-SLC9A5-2	796	0	20	0.001	23.4491	14.5172	Up	7.22e-06	5.34e-05
lnc-XBP1-1	677	0	17	0.001	23.4352	14.5164	Up	4.33e-05	0.000260931
lnc-LRRTM4-2	478	0	12	0.001	23.4295	14.516	Up	0.000854844	0.00351465
lnc-TGFB1-3	279	0	7	0.001	23.4155	14.5152	Up	0.0168932	0.0439043
lnc-LILRA1-2	319	0	8	0.001	23.405	14.5145	Up	0.00930136	0.0270997
lnc-ADI1-2	718	0	18	0.001	23.3968	14.514	Up	2.38e-05	0.000155047
lnc-MAP1LC3B2-7	359	0	9	0.001	23.3968	14.514	Up	0.00512132	0.0165976
lnc-HERC1-2	758	0	19	0.001	23.3934	14.5138	Up	1.31e-05	9.05e-05
lnc-TBC1D30-4	399	0	10	0.001	23.3903	14.5136	Up	0.0028198	0.00998455
lnc-CERS4-5	399	0	10	0.001	23.3903	14.5136	Up	0.0028198	0.00978323
lnc-ERAL1-5	599	0	15	0.001	23.3708	14.5124	Up	0.00014269	0.000738748
lnc-MAPK8-3	719	0	18	0.001	23.3643	14.512	Up	2.38e-05	0.000154299
lnc-SGCA-2	839	0	21	0.001	23.3597	14.5117	Up	3.98e-06	3.13e-05
lnc-C6orf203-4	240	0	6	0.001	23.3318	14.51	Up	0.0306814	0.072914
lnc-GADD45A-4	280	0	7	0.001	23.3318	14.51	Up	0.0168932	0.04328
lnc-TPRA1-5	1001	0	25	0.001	23.3085	14.5086	Up	3.65e-07	3.69e-06
lnc-TMEM178-6	521	0	13	0.001	23.2871	14.5072	Up	0.000470676	0.00214162
lnc-KCNMB2-13	521	0	13	0.001	23.2871	14.5072	Up	0.000470676	0.00210692
lnc-SLITRK1-1	321	0	8	0.001	23.2592	14.5055	Up	0.00930136	0.0266654
TSR3	1204	0	30	0.001	23.2543	14.5052	Up	1.85e-08	2.44e-07
lnc-STAG1-2	562	0	14	0.001	23.2488	14.5049	Up	0.000259154	0.00126693
lnc-AP001496.1-2	1205	0	30	0.001	23.235	14.504	Up	1.85e-08	2.43e-07
CEACAM18	1125	0	28	0.001	23.2281	14.5036	Up	6.1e-08	7.24e-07
lnc-ACVR2A-6	884	0	22	0.001	23.2263	14.5035	Up	2.19e-06	1.85e-05
lnc-CTNNA1-3	201	0	5	0.001	23.2158	14.5028	Up	0.0557238	0.117977
lnc-VPS33A-1	201	0	5	0.001	23.2158	14.5028	Up	0.0557238	0.116108
lnc-SUV420H1-2	603	0	15	0.001	23.2158	14.5028	Up	0.00014269	0.000740599
lnc-C1orf133-3	201	0	5	0.001	23.2158	14.5028	Up	0.0557238	0.114776
lnc-ZNF730-13	764	0	19	0.001	23.2097	14.5024	Up	1.31e-05	8.91e-05
lnc-FDXACB1-1	684	0	17	0.001	23.1954	14.5016	Up	4.33e-05	0.000262139
lnc-GOLGA4-1	282	0	7	0.001	23.1664	14.4997	Up	0.0168932	0.0439364
lnc-NDUFS5-2	726	0	18	0.001	23.139	14.498	Up	2.38e-05	0.000155006
lnc-WNT4-1	323	0	8	0.001	23.1151	14.4966	Up	0.00930136	0.0267085
lnc-MAFB-2	1455	0	36	0.001	23.0913	14.4951	Up	5.15e-10	9.23e-09
lnc-C22orf24-2	283	0	7	0.001	23.0845	14.4946	Up	0.0168932	0.0445776
lnc-C17orf48-6	2426	0	60	0.001	23.0818	14.4945	Up	3.1e-16	1.5e-14
lnc-VGLL3-3	809	0	20	0.001	23.0723	14.4939	Up	7.22e-06	5.35e-05
lnc-DERL1-3	324	0	8	0.001	23.0438	14.4921	Up	0.00930136	0.0275468
lnc-FBXO21-1	324	0	8	0.001	23.0438	14.4921	Up	0.00930136	0.0275042
lnc-KDELR3-2	243	0	6	0.001	23.0438	14.4921	Up	0.0306814	0.0727818
lnc-CFL1-1	932	0	23	0.001	23.0314	14.4913	Up	1.21e-06	1.08e-05
lnc-CCT5-29	446	0	11	0.001	23.018	14.4905	Up	0.00155257	0.00591847
lnc-TM2D1-2	649	0	16	0.001	23.0083	14.4899	Up	7.86e-05	0.000437843
OR5W2	933	0	23	0.001	23.0067	14.4898	Up	1.21e-06	1.08e-05
lnc-NECAB1-3	568	0	14	0.001	23.0032	14.4895	Up	0.000259154	0.00126918
lnc-ARL5C-9	568	0	14	0.001	23.0032	14.4895	Up	0.000259154	0.00126197
lnc-MYOT-3	771	0	19	0.001	22.999	14.4893	Up	1.31e-05	8.94e-05
lnc-GNL1-2	1218	0	30	0.001	22.987	14.4885	Up	1.85e-08	2.43e-07
lnc-TMUB2-3	528	0	13	0.001	22.9783	14.488	Up	0.000470676	0.0021309
lnc-KIF4B-1	1139	0	28	0.001	22.9426	14.4857	Up	6.1e-08	7.21e-07
lnc-TEX261-2	570	0	14	0.001	22.9225	14.4845	Up	0.000259154	0.00127093
lnc-MFSD9-17	570	0	14	0.001	22.9225	14.4845	Up	0.000259154	0.00125766
lnc-HUS1-2	775	0	19	0.001	22.8803	14.4818	Up	1.31e-05	8.98e-05
lnc-GABPB1-1	612	0	15	0.001	22.8744	14.4814	Up	0.00014269	0.000739056
DEFB4A	449	0	11	0.001	22.8642	14.4808	Up	0.00155257	0.00593987
lnc-GALNTL4-3	245	0	6	0.001	22.8557	14.4803	Up	0.0306814	0.0710565
lnc-RP11-826N14.2.1-4	1511	0	37	0.001	22.8532	14.4801	Up	2.84e-10	5.34e-09
lnc-AGBL4-1	858	0	21	0.001	22.8424	14.4794	Up	3.98e-06	3.13e-05
lnc-GLRX-1	450	0	11	0.001	22.8134	14.4776	Up	0.00155257	0.00597157
lnc-DNAH7-3	900	0	22	0.001	22.8134	14.4776	Up	2.19e-06	1.83e-05
lnc-CDS2-9	614	0	15	0.001	22.7998	14.4767	Up	0.00014269	0.000742847
lnc-RUNX3-3	614	0	15	0.001	22.7998	14.4767	Up	0.00014269	0.000741915
lnc-STAU1-3	246	0	6	0.001	22.7628	14.4744	Up	0.0306814	0.0733698
lnc-KAT7-2	451	0	11	0.001	22.7628	14.4744	Up	0.00155257	0.00601718
lnc-AC024940.1-3	246	0	6	0.001	22.7628	14.4744	Up	0.0306814	0.0728235
lnc-OR51B4-3	410	0	10	0.001	22.7628	14.4744	Up	0.0028198	0.00984297
lnc-NDUFS6-2	370	0	9	0.001	22.7013	14.4705	Up	0.00512132	0.0163273
lnc-RP11-467M13.1.1-6	453	0	11	0.001	22.6623	14.468	Up	0.00155257	0.00600454
lnc-HOXC13-5	906	0	22	0.001	22.6623	14.468	Up	2.19e-06	1.84e-05
lnc-SEC62-2	865	0	21	0.001	22.6575	14.4677	Up	3.98e-06	3.14e-05
lnc-TMPRSS15-16	412	0	10	0.001	22.6523	14.4674	Up	0.0028198	0.0100346
lnc-TPGS2-4	206	0	5	0.001	22.6523	14.4674	Up	0.0557238	0.117546
lnc-HEXIM2-3	619	0	15	0.001	22.6157	14.465	Up	0.00014269	0.000736831
lnc-IFT20-10	1981	0	48	0.001	22.6134	14.4649	Up	4e-13	1.22e-11
lnc-OSTF1-2	908	0	22	0.001	22.6124	14.4648	Up	2.19e-06	1.83e-05
lnc-CIB3-3	578	0	14	0.001	22.6052	14.4644	Up	0.000259154	0.00126457
lnc-SNX13-5	1445	0	35	0.001	22.6052	14.4644	Up	9.36e-10	1.6e-08
lnc-OSBPL1A-10	248	0	6	0.001	22.5792	14.4627	Up	0.0306814	0.0721451
lnc-C10orf10-3	868	0	21	0.001	22.5792	14.4627	Up	3.98e-06	3.13e-05
lnc-SMARCAD1-1	331	0	8	0.001	22.5565	14.4613	Up	0.00930136	0.0275124
lnc-APOL4-2	538	0	13	0.001	22.5512	14.4609	Up	0.000470676	0.00214732
lnc-RAPGEF2-5	207	0	5	0.001	22.5428	14.4604	Up	0.0557238	0.117203
lnc-MRPL15-3	290	0	7	0.001	22.5273	14.4594	Up	0.0168932	0.0445705
lnc-DEK-3	1160	0	28	0.001	22.5273	14.4594	Up	6.1e-08	7.2e-07
lnc-MRPL19-11	870	0	21	0.001	22.5273	14.4594	Up	3.98e-06	3.13e-05
lnc-TCEANC2-4	290	0	7	0.001	22.5273	14.4594	Up	0.0168932	0.0434187
AOC4P	2073	0	50	0.001	22.5102	14.4583	Up	1.21e-13	4.03e-12
lnc-LRTM2-4	622	0	15	0.001	22.5066	14.4581	Up	0.00014269	0.000748331
lnc-USP6-2	1866	0	45	0.001	22.5066	14.4581	Up	2.4e-12	6.38e-11
CNN1	1908	0	46	0.001	22.5003	14.4577	Up	1.32e-12	3.64e-11
lnc-NPAS1-6	954	0	23	0.001	22.5003	14.4577	Up	1.21e-06	1.08e-05
lnc-TIGD4-4	1120	0	27	0.001	22.4986	14.4575	Up	1.11e-07	1.25e-06
lnc-C1D-5	665	0	16	0.001	22.4547	14.4547	Up	7.86e-05	0.000436668
lnc-NGFR-2	416	0	10	0.001	22.4345	14.4534	Up	0.0028198	0.00985197
lnc-ZNF23-5	874	0	21	0.001	22.4242	14.4528	Up	3.98e-06	3.16e-05
lnc-AHSA2-2	791	0	19	0.001	22.4174	14.4523	Up	1.31e-05	9.05e-05
MRPL46	1000	0	24	0.001	22.3986	14.4511	Up	6.64e-07	6.33e-06
lnc-TMEM8A-3	375	0	9	0.001	22.3986	14.4511	Up	0.00512132	0.0166257
lnc-POT1-5	375	0	9	0.001	22.3986	14.4511	Up	0.00512132	0.0164603
lnc-WHSC1L1-6	375	0	9	0.001	22.3986	14.4511	Up	0.00512132	0.0162918
lnc-NEGR1-2	250	0	6	0.001	22.3986	14.4511	Up	0.0306814	0.0711891
lnc-AKR1E2-13	417	0	10	0.001	22.3807	14.45	Up	0.0028198	0.010054
lnc-ATP1A1-1	417	0	10	0.001	22.3807	14.45	Up	0.0028198	0.00982642
lnc-C20orf118-2	292	0	7	0.001	22.373	14.4495	Up	0.0168932	0.0443821
lnc-RAB27B-9	584	0	14	0.001	22.373	14.4495	Up	0.000259154	0.00125852
EID2B	1335	0	32	0.001	22.3706	14.4493	Up	5.61e-09	8.19e-08
lnc-PDCL2-1	334	0	8	0.001	22.3539	14.4482	Up	0.00930136	0.027555
lnc-ZNF366-7	334	0	8	0.001	22.3539	14.4482	Up	0.00930136	0.0274438
lnc-KLRG2-4	334	0	8	0.001	22.3539	14.4482	Up	0.00930136	0.0271714
lnc-COX6A2-3	334	0	8	0.001	22.3539	14.4482	Up	0.00930136	0.0269262
lnc-TRIM29-5	334	0	8	0.001	22.3539	14.4482	Up	0.00930136	0.0269199
lnc-AGBL4-7	1044	0	25	0.001	22.3485	14.4479	Up	3.65e-07	3.69e-06
lnc-ZNF780A-2	376	0	9	0.001	22.339	14.4473	Up	0.00512132	0.0164411
lnc-ZNF81-1	1212	0	29	0.001	22.3308	14.4467	Up	3.36e-08	4.21e-07
lnc-TFCP2L1-5	209	0	5	0.001	22.3271	14.4465	Up	0.0557238	0.114614
lnc-TSHZ2-10	1296	0	31	0.001	22.3237	14.4463	Up	1.02e-08	1.41e-07
lnc-TRAF3IP2-2	293	0	7	0.001	22.2966	14.4445	Up	0.0168932	0.044561
LINC01523	628	0	15	0.001	22.2916	14.4442	Up	0.00014269	0.000746678
OR52N1	963	0	23	0.001	22.29	14.4441	Up	1.21e-06	1.07e-05
C16orf54	2596	0	62	0.001	22.2893	14.4441	Up	9.41e-17	4.9e-15
lnc-FAM98A-4	838	0	20	0.001	22.2738	14.4431	Up	7.22e-06	5.31e-05
lnc-LLPH-6	587	0	14	0.001	22.2587	14.4421	Up	0.000259154	0.00125313
lnc-TNFRSF21-3	294	0	7	0.001	22.2208	14.4396	Up	0.0168932	0.0446391
lnc-NDUFA8-2	210	0	5	0.001	22.2208	14.4396	Up	0.0557238	0.117936
lnc-COMMD10-4	420	0	10	0.001	22.2208	14.4396	Up	0.0028198	0.00990415
lnc-COPG-1	210	0	5	0.001	22.2208	14.4396	Up	0.0557238	0.113992
SPNS3	1893	0	45	0.001	22.1856	14.4373	Up	2.4e-12	6.37e-11
lnc-PEX2-1	463	0	11	0.001	22.1728	14.4365	Up	0.00155257	0.00602939
lnc-STAG1-3	421	0	10	0.001	22.168	14.4362	Up	0.0028198	0.00994348
lnc-EIF4ENIF1-3	632	0	15	0.001	22.1505	14.4351	Up	0.00014269	0.000744406
LMOD2	2149	0	51	0.001	22.1484	14.4349	Up	6.68e-14	2.31e-12
lnc-HOXC13-4	295	0	7	0.001	22.1455	14.4347	Up	0.0168932	0.0440262
lnc-UQCRFS1-5	1012	0	24	0.001	22.133	14.4339	Up	6.64e-07	6.24e-06
lnc-TSSC1-3	464	0	11	0.001	22.125	14.4334	Up	0.00155257	0.00589227
lnc-CES5A-1	1309	0	31	0.001	22.102	14.4319	Up	1.02e-08	1.42e-07
OR6T1	972	0	23	0.001	22.0836	14.4307	Up	1.21e-06	1.09e-05
lnc-AP001631.10.1-1	465	0	11	0.001	22.0774	14.4303	Up	0.00155257	0.00596511
lnc-SBDS-22	423	0	10	0.001	22.0632	14.4294	Up	0.0028198	0.010036
ZNF93	2794	0	66	0.001	22.0458	14.4282	Up	8.65e-18	5.16e-16
lnc-SLC6A9-5	508	0	12	0.001	22.0458	14.4282	Up	0.000854844	0.00356775
lnc-IL1RN-2	508	0	12	0.001	22.0458	14.4282	Up	0.000854844	0.00353717
lnc-NDUFB4-3	339	0	8	0.001	22.0242	14.4268	Up	0.00930136	0.0275944
lnc-CD180-8	975	0	23	0.001	22.0157	14.4262	Up	1.21e-06	1.09e-05
lnc-KCNRG-4	1187	0	28	0.001	22.0149	14.4262	Up	6.1e-08	7.2e-07
lnc-SUFU-1	370	0	10	0.001	22.0112	14.4259	Up	0.0028198	0.0100281
lnc-ZNF235-4	424	0	10	0.001	22.0112	14.4259	Up	0.0028198	0.00994701
lnc-C21orf91-4	424	0	10	0.001	22.0112	14.4259	Up	0.0028198	0.00992659
OR51B4	933	0	22	0.001	22.0065	14.4256	Up	2.19e-06	1.83e-05
lnc-MAST4-2	509	0	12	0.001	22.0025	14.4254	Up	0.000854844	0.0035266
lnc-SLC7A3-4	297	0	7	0.001	21.9964	14.425	Up	0.0168932	0.0438127
lnc-PKIG-2	849	0	20	0.001	21.9852	14.4242	Up	7.22e-06	5.37e-05
SDC4P	467	0	11	0.001	21.9829	14.4241	Up	0.00155257	0.00601812
lnc-MINA-1	467	0	11	0.001	21.9829	14.4241	Up	0.00155257	0.0059085
lnc-HIVEP2-6	552	0	13	0.001	21.9793	14.4239	Up	0.000470676	0.00212413
lnc-NAIF1-2	765	0	18	0.001	21.9594	14.4225	Up	2.38e-05	0.000154804
lnc-C9orf102-8	425	0	10	0.001	21.9594	14.4225	Up	0.0028198	0.00982091
lnc-FAM98B-2	553	0	13	0.001	21.9395	14.4212	Up	0.000470676	0.00210068
lnc-IL17RD-1	298	0	7	0.001	21.9225	14.4201	Up	0.0168932	0.0433112
lnc-DGKE-6	213	0	5	0.001	21.9078	14.4192	Up	0.0557238	0.118781
lnc-SPEF2-2	213	0	5	0.001	21.9078	14.4192	Up	0.0557238	0.116533
lnc-ATP6V0E2-6	554	0	13	0.001	21.8999	14.4186	Up	0.000470676	0.00211511
lnc-FAM86A-10	1918	0	45	0.001	21.8964	14.4184	Up	2.4e-12	6.39e-11
lnc-TCP10L2-1	597	0	14	0.001	21.8858	14.4177	Up	0.000259154	0.00127344
lnc-TNFRSF17-1	384	0	9	0.001	21.8736	14.4169	Up	0.00512132	0.0163777
lnc-ST8SIA2-2	427	0	10	0.001	21.8565	14.4158	Up	0.0028198	0.010088
lnc-MED27-3	299	0	7	0.001	21.8492	14.4153	Up	0.0168932	0.0440447
lnc-HNRNPA3-10	1624	0	38	0.001	21.8377	14.4145	Up	1.56e-10	3.03e-09
lnc-HDAC2-10	342	0	8	0.001	21.831	14.4141	Up	0.00930136	0.0268902
lnc-GKN2-1	898	0	21	0.001	21.8249	14.4137	Up	3.98e-06	3.14e-05
lnc-RP11-778D12.2.1-4	1112	0	26	0.001	21.8211	14.4134	Up	2.01e-07	2.13e-06
lnc-C19orf35-1	813	0	19	0.001	21.8108	14.4128	Up	1.31e-05	9.07e-05
lnc-DDIT3-2	471	0	11	0.001	21.7962	14.4118	Up	0.00155257	0.00600361
lnc-IL6-11	557	0	13	0.001	21.782	14.4108	Up	0.000470676	0.00211759
lnc-SLC25A5-2	300	0	7	0.001	21.7764	14.4105	Up	0.0168932	0.0441674
lnc-PIGR-1	386	0	9	0.001	21.7603	14.4094	Up	0.00512132	0.0165211
LOC101927296	902	0	21	0.001	21.7281	14.4073	Up	3.98e-06	3.15e-05
lnc-PSMB3-1	1161	0	27	0.001	21.704	14.4057	Up	1.11e-07	1.26e-06
lnc-VGLL4-5	258	0	6	0.001	21.704	14.4057	Up	0.0306814	0.0717414
lnc-COPS2-5	301	0	7	0.001	21.704	14.4057	Up	0.0168932	0.0434861
lnc-NDST3-10	818	0	19	0.001	21.6775	14.4039	Up	1.31e-05	9.03e-05
lnc-AP3S1-1	1502	0	19	0.001	21.6775	14.4039	Up	1.31e-05	9.01e-05
lnc-NSUN6-2	689	0	16	0.001	21.6725	14.4036	Up	7.86e-05	0.000443862
C17orf89	560	0	13	0.001	21.6653	14.4031	Up	0.000470676	0.0021037
TRIM16L	1982	0	46	0.001	21.6602	14.4028	Up	1.32e-12	3.65e-11
lnc-UMOD-1	388	0	9	0.001	21.6481	14.402	Up	0.00512132	0.0163409
lnc-ACSBG1-1	388	0	9	0.001	21.6481	14.402	Up	0.00512132	0.0162481
lnc-POLK-6	345	0	8	0.001	21.6411	14.4015	Up	0.00930136	0.0269591
lnc-POLA1-4	345	0	8	0.001	21.6411	14.4015	Up	0.00930136	0.0268996
lnc-FBXO47-4	302	0	7	0.001	21.6322	14.4009	Up	0.0168932	0.0444314
lnc-DKK3-3	302	0	7	0.001	21.6322	14.4009	Up	0.0168932	0.0442722
lnc-ELF2-2	259	0	6	0.001	21.6202	14.4001	Up	0.0306814	0.0729628
lnc-AC079135.1.1-6	2548	0	59	0.001	21.6103	14.3994	Up	5.64e-16	2.65e-14
lnc-SNAPC5-2	432	0	10	0.001	21.6036	14.399	Up	0.0028198	0.0100453
lnc-RWDD4-3	432	0	10	0.001	21.6036	14.399	Up	0.0028198	0.00977982
lnc-MKRN1-4	562	0	13	0.001	21.5882	14.398	Up	0.000470676	0.00214673
lnc-KDM4B-2	346	0	8	0.001	21.5786	14.3973	Up	0.00930136	0.0269231
lnc-SLC10A7-2	346	0	8	0.001	21.5786	14.3973	Up	0.00930136	0.0266516
CCL4L1	822	0	19	0.001	21.572	14.3969	Up	1.31e-05	9.08e-05
lnc-SYT13-3	606	0	14	0.001	21.5608	14.3961	Up	0.000259154	0.00125289
lnc-CRYL1-1	1343	0	31	0.001	21.5424	14.3949	Up	1.02e-08	1.41e-07
lnc-MRPS6-6	2253	0	52	0.001	21.5403	14.3947	Up	3.68e-14	1.32e-12
lnc-TOMM20-4	477	0	11	0.001	21.522	14.3935	Up	0.00155257	0.00593576
lnc-KIAA0226-4	217	0	5	0.001	21.504	14.3923	Up	0.0557238	0.119405
lnc-EPS8L2-1	912	0	21	0.001	21.4899	14.3914	Up	3.98e-06	3.16e-05
KIR2DS4	1608	0	37	0.001	21.4746	14.3903	Up	2.84e-10	5.33e-09
lnc-CASP3-7	565	0	13	0.001	21.4736	14.3903	Up	0.000470676	0.00211951
lnc-HELZ-1	348	0	8	0.001	21.4546	14.389	Up	0.00930136	0.027578
lnc-GPCPD1-5	261	0	6	0.001	21.4546	14.389	Up	0.0306814	0.0724466
lnc-C11orf36-3	783	0	18	0.001	21.4546	14.389	Up	2.38e-05	0.000152905
lnc-DLGAP4-1	1393	0	32	0.001	21.4392	14.388	Up	5.61e-09	8.16e-08
lnc-HSP90AA1-1	566	0	13	0.001	21.4356	14.3877	Up	0.000470676	0.00215305
lnc-FAM210A-6	1698	0	39	0.001	21.4356	14.3877	Up	8.6e-11	1.76e-09
lnc-MAK16-1	784	0	18	0.001	21.4272	14.3872	Up	2.38e-05	0.000154844
lnc-DPY19L2-7	1220	0	28	0.001	21.4194	14.3866	Up	6.1e-08	7.22e-07
lnc-SEC24C-2	218	0	5	0.001	21.4054	14.3857	Up	0.0557238	0.117997
OR2L2	1134	0	26	0.001	21.3978	14.3852	Up	2.01e-07	2.15e-06
lnc-KLC4-1	349	0	8	0.001	21.3931	14.3849	Up	0.00930136	0.0276076
lnc-DENR-2	961	0	22	0.001	21.3653	14.383	Up	2.19e-06	1.84e-05
lnc-RP11-796G6.2.1-3	1005	0	23	0.001	21.3585	14.3825	Up	1.21e-06	1.07e-05
lnc-FAM110C-2	787	0	18	0.001	21.3455	14.3816	Up	2.38e-05	0.000153539
lnc-WARS-2	1050	0	24	0.001	21.332	14.3807	Up	6.64e-07	6.27e-06
lnc-NCAM1-1	832	0	19	0.001	21.3127	14.3794	Up	1.31e-05	9.01e-05
lnc-KLHDC10-2	832	0	19	0.001	21.3127	14.3794	Up	1.31e-05	8.96e-05
lnc-DCST1-1	219	0	5	0.001	21.3076	14.3791	Up	0.0557238	0.116113
lnc-MRPS18A-1	701	0	16	0.001	21.3015	14.3787	Up	7.86e-05	0.000438236
lnc-PRKD1-16	964	0	22	0.001	21.2988	14.3785	Up	2.19e-06	1.85e-05
lnc-OSGIN1-1	2279	0	52	0.001	21.2945	14.3782	Up	3.68e-14	1.31e-12
lnc-RPS4XP21-5	263	0	6	0.001	21.2914	14.378	Up	0.0306814	0.0714726
lnc-DUSP14-1	351	0	8	0.001	21.2712	14.3766	Up	0.00930136	0.0267224
lnc-C12orf71-1	351	0	8	0.001	21.2712	14.3766	Up	0.00930136	0.0266086
lnc-DCTN6-2	439	0	10	0.001	21.2591	14.3758	Up	0.0028198	0.00995266
lnc-TYW5-5	483	0	11	0.001	21.2547	14.3755	Up	0.00155257	0.00599522
lnc-NR4A2-3	571	0	13	0.001	21.2479	14.375	Up	0.000470676	0.00212028
lnc-ZYX-1	615	0	14	0.001	21.2453	14.3749	Up	0.000259154	0.00127331
SSX3	1319	0	30	0.001	21.2268	14.3736	Up	1.85e-08	2.45e-07
lnc-TMEM39B-1	660	0	15	0.001	21.2108	14.3725	Up	0.00014269	0.000745814
lnc-ACSM5-2	352	0	8	0.001	21.2108	14.3725	Up	0.00930136	0.0271299
lnc-INPP1-1	528	0	12	0.001	21.2108	14.3725	Up	0.000854844	0.00355462
lnc-PPM1E-3	264	0	6	0.001	21.2108	14.3725	Up	0.0306814	0.0722202
lnc-RP11-247C2.2.1-3	572	0	13	0.001	21.2108	14.3725	Up	0.000470676	0.00210825
lnc-C7orf73-2	617	0	14	0.001	21.1764	14.3702	Up	0.000259154	0.00127005
lnc-CDKN3-5	309	0	7	0.001	21.1421	14.3678	Up	0.0168932	0.0448178
lnc-CTTN-8	2252	0	51	0.001	21.1354	14.3674	Up	6.68e-14	2.31e-12
lnc-ZNF287-2	486	0	11	0.001	21.1235	14.3666	Up	0.00155257	0.00592665
lnc-NPR2-1	1238	0	28	0.001	21.108	14.3655	Up	6.1e-08	7.2e-07
lnc-CCR8-1	796	0	18	0.001	21.1042	14.3652	Up	2.38e-05	0.000154682
lnc-SSTR4-18	398	0	9	0.001	21.1042	14.3652	Up	0.00512132	0.0164666
lnc-FBXL17-1	398	0	9	0.001	21.1042	14.3652	Up	0.00512132	0.0162026
lnc-AHI1-6	531	0	12	0.001	21.0909	14.3643	Up	0.000854844	0.00355938
lnc-PJA1-2	310	0	7	0.001	21.0739	14.3632	Up	0.0168932	0.0439341
lnc-NPTXR-1	753	0	17	0.001	21.0699	14.3629	Up	4.33e-05	0.000262459
lnc-FAM210A-3	665	0	15	0.001	21.0513	14.3616	Up	0.00014269	0.000746521
lnc-ZCCHC17-13	1730	0	39	0.001	21.0391	14.3608	Up	8.6e-11	1.75e-09
lnc-GRHL2-15	355	0	8	0.001	21.0315	14.3603	Up	0.00930136	0.0270079
lnc-AC217773.1-1	666	0	15	0.001	21.0197	14.3595	Up	0.00014269	0.000741605
lnc-CARD14-2	711	0	16	0.001	21.0019	14.3582	Up	7.86e-05	0.000436035
lnc-AC073043.2.1-1	489	0	11	0.001	20.9939	14.3577	Up	0.00155257	0.00587926
lnc-BRI3-3	578	0	13	0.001	20.9906	14.3575	Up	0.000470676	0.00215186
lnc-NPC2-1	935	0	21	0.001	20.9612	14.3554	Up	3.98e-06	3.16e-05
lnc-BBS9-1	1648	0	37	0.001	20.9534	14.3549	Up	2.84e-10	5.32e-09
lnc-ZNF99-3	490	0	11	0.001	20.951	14.3547	Up	0.00155257	0.00593713
lnc-OAZ3-13	401	0	9	0.001	20.9463	14.3544	Up	0.00512132	0.0162751
KRT39	1696	0	38	0.001	20.9106	14.3519	Up	1.56e-10	3.03e-09
REREP3	804	0	18	0.001	20.8942	14.3508	Up	2.38e-05	0.000152885
lnc-DBC1-1	492	0	11	0.001	20.8659	14.3489	Up	0.00155257	0.00605208
lnc-NDEL1-5	492	0	11	0.001	20.8659	14.3489	Up	0.00155257	0.0059417
ARHGAP9	2597	0	58	0.001	20.8432	14.3473	Up	1.02e-15	4.65e-14
lnc-CCDC7-6	1075	0	24	0.001	20.8359	14.3468	Up	6.64e-07	6.25e-06
lnc-ZNF565-1	448	0	10	0.001	20.832	14.3465	Up	0.0028198	0.00997674
BPNT1	2465	0	55	0.001	20.8236	14.3459	Up	6.13e-15	2.49e-13
lnc-PRDM15-1	493	0	11	0.001	20.8236	14.3459	Up	0.00155257	0.00591575
lnc-IL36B-1	269	0	6	0.001	20.8165	14.3454	Up	0.0306814	0.0715664
lnc-GHRH-2	673	0	15	0.001	20.801	14.3444	Up	0.00014269	0.000751183
lnc-SMC1B-5	359	0	8	0.001	20.7972	14.3441	Up	0.00930136	0.0275895
lnc-DLK1-1	943	0	21	0.001	20.7834	14.3431	Up	3.98e-06	3.17e-05
lnc-ACOT13-1	405	0	9	0.001	20.7394	14.3401	Up	0.00512132	0.0166041
lnc-AC011294.3.1-5	405	0	9	0.001	20.7394	14.3401	Up	0.00512132	0.0163283
SCGB2B3P	180	0	4	0.001	20.7394	14.3401	Up	0.101206	0.183183
lnc-ARHGDIB-3	360	0	8	0.001	20.7394	14.3401	Up	0.00930136	0.0267734
lnc-HIATL1-16	1937	0	43	0.001	20.718	14.3386	Up	7.9e-12	1.94e-10
lnc-RPP40-3	2253	0	50	0.001	20.7118	14.3382	Up	1.21e-13	4.04e-12
lnc-PCNX-3	721	0	16	0.001	20.7107	14.3381	Up	7.86e-05	0.000440112
lnc-MYO18B-1	451	0	10	0.001	20.6934	14.3369	Up	0.0028198	0.0100967
lnc-APBB2-1	451	0	10	0.001	20.6934	14.3369	Up	0.0028198	0.00996044
lnc-AP2B1-1	361	0	8	0.001	20.682	14.3361	Up	0.00930136	0.0274829
lnc-ARL4C-8	271	0	6	0.001	20.6629	14.3348	Up	0.0306814	0.0722066
lnc-DOCK8-2	723	0	16	0.001	20.6534	14.3341	Up	7.86e-05	0.000434531
lnc-RPS4XP21-7	226	0	5	0.001	20.6476	14.3337	Up	0.0557238	0.118985
lnc-RPS27L-5	226	0	5	0.001	20.6476	14.3337	Up	0.0557238	0.118137
NRN1L	633	0	14	0.001	20.6411	14.3332	Up	0.000259154	0.00126955
lnc-PBX3-2	633	0	14	0.001	20.6411	14.3332	Up	0.000259154	0.00126246
lnc-THAP4-1	1221	0	27	0.001	20.6375	14.333	Up	1.11e-07	1.25e-06
lnc-RND3-6	453	0	10	0.001	20.6021	14.3305	Up	0.0028198	0.00997461
lnc-RP11-113D6.10.1-1	681	0	15	0.001	20.5567	14.3273	Up	0.00014269	0.000749992
lnc-SHISA2-1	454	0	10	0.001	20.5567	14.3273	Up	0.0028198	0.00995195
lnc-GGPS1-9	227	0	5	0.001	20.5567	14.3273	Up	0.0557238	0.116352
lnc-HSPA8-2	454	0	10	0.001	20.5567	14.3273	Up	0.0028198	0.0098161
lnc-ZNF586-1	545	0	12	0.001	20.5491	14.3268	Up	0.000854844	0.00352573
lnc-HMGN3-1	318	0	7	0.001	20.5438	14.3264	Up	0.0168932	0.0438905
lnc-ZNF366-13	318	0	7	0.001	20.5438	14.3264	Up	0.0168932	0.0433447
lnc-AP002478.1-5	727	0	16	0.001	20.5397	14.3261	Up	7.86e-05	0.000441954
lnc-COG2-4	818	0	18	0.001	20.5366	14.3259	Up	2.38e-05	0.000153599
lnc-PIRT-2	591	0	13	0.001	20.5289	14.3254	Up	0.000470676	0.00215523
lnc-ZBTB7C-1	591	0	13	0.001	20.5289	14.3254	Up	0.000470676	0.00211282
lnc-BTNL8-5	864	0	19	0.001	20.5234	14.325	Up	1.31e-05	8.91e-05
lnc-TRIM32-3	774	0	17	0.001	20.4983	14.3232	Up	4.33e-05	0.00025833
lnc-FOXN2-1	1002	0	22	0.001	20.491	14.3227	Up	2.19e-06	1.83e-05
lnc-LRRC58-1	1185	0	26	0.001	20.4769	14.3217	Up	2.01e-07	2.13e-06
lnc-ZNF541-1	547	0	12	0.001	20.474	14.3215	Up	0.000854844	0.00359642
lnc-ATMIN-2	593	0	13	0.001	20.4596	14.3205	Up	0.000470676	0.00214574
lnc-SPATA19-6	365	0	8	0.001	20.4553	14.3202	Up	0.00930136	0.0266041
lnc-C9orf117-2	365	0	8	0.001	20.4553	14.3202	Up	0.00930136	0.0265872
lnc-AC091132.2-10	3057	0	67	0.001	20.4545	14.3201	Up	4.76e-18	2.91e-16
lnc-RP11-15G16.1.1-3	502	0	11	0.001	20.4502	14.3198	Up	0.00155257	0.00606397
lnc-ZNF175-3	411	0	9	0.001	20.4367	14.3189	Up	0.00512132	0.0166496
lnc-C4orf52-5	685	0	15	0.001	20.4367	14.3189	Up	0.00014269	0.000739827
lnc-TXNRD1-5	411	0	9	0.001	20.4367	14.3189	Up	0.00512132	0.016272
lnc-SLC7A2-1	2101	0	46	0.001	20.4334	14.3186	Up	1.32e-12	3.63e-11
lnc-SLC9A1-3	640	0	14	0.001	20.4154	14.3174	Up	0.000259154	0.00127697
lnc-IRF9-2	320	0	7	0.001	20.4154	14.3174	Up	0.0168932	0.0442232
lnc-AEBP1-2	366	0	8	0.001	20.3994	14.3162	Up	0.00930136	0.0271251
lnc-CEP128-3	229	0	5	0.001	20.3772	14.3147	Up	0.0557238	0.116818
lnc-RP11-148O21.3.1-2	504	0	11	0.001	20.3691	14.3141	Up	0.00155257	0.0060153
lnc-C2orf77-4	550	0	12	0.001	20.3623	14.3136	Up	0.000854844	0.00361016
lnc-AL901608.1-69	275	0	6	0.001	20.3623	14.3136	Up	0.0306814	0.0735963
lnc-PLS1-3	275	0	6	0.001	20.3623	14.3136	Up	0.0306814	0.0719003
SAT2	963	0	21	0.001	20.3518	14.3129	Up	3.98e-06	3.16e-05
lnc-MT1G-6	643	0	14	0.001	20.3201	14.3106	Up	0.000259154	0.00125668
lnc-MRPS5-8	368	0	8	0.001	20.2886	14.3084	Up	0.00930136	0.0274308
lnc-SEMA6C-3	644	0	14	0.001	20.2886	14.3084	Up	0.000259154	0.0012693
lnc-AEN-3	276	0	6	0.001	20.2886	14.3084	Up	0.0306814	0.0724913
lnc-RP11-82I10.1.1-10	414	0	9	0.001	20.2886	14.3084	Up	0.00512132	0.0163998
lnc-DFNA5-7	460	0	10	0.001	20.2886	14.3084	Up	0.0028198	0.00989297
lnc-CHRDL2-1	322	0	7	0.001	20.2886	14.3084	Up	0.0168932	0.0437146
lnc-EPC1-1	230	0	5	0.001	20.2886	14.3084	Up	0.0557238	0.114449
lnc-NTF4-3	920	0	20	0.001	20.2886	14.3084	Up	7.22e-06	5.3e-05
lnc-MB21D2-1	552	0	12	0.001	20.2886	14.3084	Up	0.000854844	0.00351378
lnc-ETNK2-3	783	0	17	0.001	20.2626	14.3065	Up	4.33e-05	0.000260048
lnc-WDR75-2	553	0	12	0.001	20.2519	14.3058	Up	0.000854844	0.00353217
TMEM211	507	0	11	0.001	20.2485	14.3055	Up	0.00155257	0.00593439
lnc-RP11-867G23.8.1-4	369	0	8	0.001	20.2336	14.3045	Up	0.00930136	0.0273481
lnc-MTRR-10	969	0	21	0.001	20.2257	14.3039	Up	3.98e-06	3.14e-05
lnc-OR7A17-1	277	0	6	0.001	20.2153	14.3032	Up	0.0306814	0.0735289
lnc-TTC26-7	277	0	6	0.001	20.2153	14.3032	Up	0.0306814	0.0728896
lnc-PLA2G2F-1	2493	0	54	0.001	20.2153	14.3032	Up	1.11e-14	4.35e-13
lnc-USF2-2	1016	0	22	0.001	20.2087	14.3027	Up	2.19e-06	1.83e-05
lnc-C14orf149-1	462	0	10	0.001	20.2007	14.3021	Up	0.0028198	0.00984781
lnc-LRRC37B-1	1895	0	41	0.001	20.1922	14.3015	Up	2.61e-11	5.8e-10
lnc-TSTD2-2	1202	0	26	0.001	20.1873	14.3012	Up	2.01e-07	2.13e-06
lnc-TAS2R46-1	925	0	20	0.001	20.1789	14.3006	Up	7.22e-06	5.37e-05
lnc-TEX264-1	925	0	20	0.001	20.1789	14.3006	Up	7.22e-06	5.35e-05
lnc-PLB1-1	370	0	8	0.001	20.1789	14.3006	Up	0.00930136	0.0266716
lnc-TSPO2-3	694	0	15	0.001	20.1716	14.3	Up	0.00014269	0.000743314
lnc-COX4NB-7	463	0	10	0.001	20.1571	14.299	Up	0.0028198	0.0100188
lnc-DDR1-3	881	0	19	0.001	20.1274	14.2969	Up	1.31e-05	8.97e-05
lnc-ZFAND3-2	371	0	8	0.001	20.1245	14.2967	Up	0.00930136	0.0274683
lnc-C8orf22-4	928	0	20	0.001	20.1137	14.2959	Up	7.22e-06	5.34e-05
lnc-MOCS3-2	557	0	12	0.001	20.1064	14.2954	Up	0.000854844	0.00356147
PRSS42	882	0	19	0.001	20.1045	14.2952	Up	1.31e-05	8.95e-05
ASB9P1	1625	0	35	0.001	20.1013	14.295	Up	9.36e-10	1.61e-08
lnc-DNAJC3-4	511	0	11	0.001	20.09	14.2942	Up	0.00155257	0.00598546
lnc-PRAM1-3	511	0	11	0.001	20.09	14.2942	Up	0.00155257	0.00589722
lnc-ITGAX-1	1767	0	38	0.001	20.0704	14.2928	Up	1.56e-10	3.05e-09
lnc-SMPD2-5	279	0	6	0.001	20.0704	14.2928	Up	0.0306814	0.0723435
lnc-OSCAR-1	372	0	8	0.001	20.0704	14.2928	Up	0.00930136	0.026978
lnc-RBMS1-9	279	0	6	0.001	20.0704	14.2928	Up	0.0306814	0.0721178
lnc-PKDREJ-3	372	0	8	0.001	20.0704	14.2928	Up	0.00930136	0.0267317
HSPBP1	1908	0	41	0.001	20.0546	14.2916	Up	2.61e-11	5.81e-10
lnc-ASCC1-2	512	0	11	0.001	20.0508	14.2914	Up	0.00155257	0.0059605
lnc-TPH2-3	2050	0	44	0.001	20.0312	14.29	Up	4.35e-12	1.11e-10
lnc-CBX3-2	466	0	10	0.001	20.0273	14.2897	Up	0.0028198	0.00991536
lnc-AC040934.1-1	513	0	11	0.001	20.0117	14.2886	Up	0.00155257	0.00603411
lnc-AC078802.1-1	513	0	11	0.001	20.0117	14.2886	Up	0.00155257	0.00594811
lnc-ACTR2-4	793	0	17	0.001	20.0071	14.2882	Up	4.33e-05	0.000262043
lnc-C6orf203-6	280	0	6	0.001	19.9987	14.2876	Up	0.0306814	0.0738778
lnc-BMP2K-2	280	0	6	0.001	19.9987	14.2876	Up	0.0306814	0.0733028
lnc-FAM101B-1	887	0	19	0.001	19.9912	14.2871	Up	1.31e-05	9e-05
lnc-MAP2K6-8	327	0	7	0.001	19.9783	14.2861	Up	0.0168932	0.0446748
lnc-ESAM-2	421	0	9	0.001	19.9512	14.2842	Up	0.00512132	0.0166627
lnc-PTOV1-1	421	0	9	0.001	19.9512	14.2842	Up	0.00512132	0.0165437
lnc-PPRC1-3	234	0	5	0.001	19.9417	14.2835	Up	0.0557238	0.118714
lnc-TP53INP1-3	281	0	6	0.001	19.9276	14.2825	Up	0.0306814	0.0713823
lnc-NUMB-4	937	0	20	0.001	19.9205	14.282	Up	7.22e-06	5.33e-05
lnc-GTF2B-10	328	0	7	0.001	19.9174	14.2817	Up	0.0168932	0.0440377
lnc-CALM2-9	469	0	10	0.001	19.8992	14.2804	Up	0.0028198	0.00989088
lnc-NPAS3-1	1079	0	23	0.001	19.8937	14.28	Up	1.21e-06	1.07e-05
lnc-BASP1-5	704	0	15	0.001	19.8851	14.2794	Up	0.00014269	0.000741063
lnc-ZNF682-1	1268	0	27	0.001	19.8725	14.2785	Up	1.11e-07	1.26e-06
lnc-RPS12-3	799	0	17	0.001	19.8569	14.2774	Up	4.33e-05	0.000262331
lnc-AKIRIN1-13	376	0	8	0.001	19.8569	14.2774	Up	0.00930136	0.0271395
lnc-C10orf68-8	282	0	6	0.001	19.8569	14.2774	Up	0.0306814	0.0726155
lnc-GTSF1L-3	235	0	5	0.001	19.8569	14.2774	Up	0.0557238	0.116528
lnc-POLD3-7	282	0	6	0.001	19.8569	14.2774	Up	0.0306814	0.0718732
lnc-ATP6AP2-12	847	0	18	0.001	19.8334	14.2756	Up	2.38e-05	0.000154239
lnc-DUSP16-4	706	0	15	0.001	19.8288	14.2753	Up	0.00014269	0.000740754
lnc-RPUSD2-1	565	0	12	0.001	19.8217	14.2748	Up	0.000854844	0.00358913
lnc-BCOR-6	3865	0	82	0.001	19.8004	14.2732	Up	6.17e-22	5.9e-20
lnc-TPPP3-2	330	0	7	0.001	19.7967	14.273	Up	0.0168932	0.044193
lnc-NCKAP1-6	330	0	7	0.001	19.7967	14.273	Up	0.0168932	0.0441744
lnc-PROC-3	896	0	19	0.001	19.7904	14.2725	Up	1.31e-05	9.09e-05
lnc-NOS2-6	283	0	6	0.001	19.7867	14.2722	Up	0.0306814	0.0717785
lnc-ELOVL3-3	472	0	10	0.001	19.7727	14.2712	Up	0.0028198	0.00988043
lnc-TTC9-4	1841	0	39	0.001	19.7706	14.2711	Up	8.6e-11	1.75e-09
lnc-DOCK5-3	567	0	12	0.001	19.7518	14.2697	Up	0.000854844	0.00353687
lnc-GADL1-9	284	0	6	0.001	19.7171	14.2672	Up	0.0306814	0.0719274
OR5E1P	521	0	11	0.001	19.7044	14.2662	Up	0.00155257	0.00588194
lnc-TMEM242-5	616	0	13	0.001	19.6957	14.2656	Up	0.000470676	0.00214653
lnc-RAD9A-2	237	0	5	0.001	19.6893	14.2651	Up	0.0557238	0.11698
lnc-PIH1D2-2	237	0	5	0.001	19.6893	14.2651	Up	0.0557238	0.115426
lnc-TM2D3-4	664	0	14	0.001	19.6775	14.2643	Up	0.000259154	0.00125655
lnc-FAM3B-8	427	0	9	0.001	19.6709	14.2638	Up	0.00512132	0.016384
RNF167	1708	0	36	0.001	19.6709	14.2638	Up	5.15e-10	9.25e-09
lnc-ZNF827-3	285	0	11	0.001	19.6667	14.2635	Up	0.00155257	0.00601624
lnc-C14orf166B-2	522	0	11	0.001	19.6667	14.2635	Up	0.00155257	0.00596972
lnc-KLHL18-4	1234	0	26	0.001	19.6638	14.2633	Up	2.01e-07	2.13e-06
lnc-C10orf137-1	950	0	20	0.001	19.6479	14.2621	Up	7.22e-06	5.36e-05
lnc-FGFR2-10	950	0	20	0.001	19.6479	14.2621	Up	7.22e-06	5.36e-05
lnc-MIA2-1	475	0	10	0.001	19.6479	14.2621	Up	0.0028198	0.0100231
lnc-AQP2-2	665	0	14	0.001	19.6479	14.2621	Up	0.000259154	0.00126209
lnc-RUVBL1-2	1285	0	27	0.001	19.6096	14.2593	Up	1.11e-07	1.24e-06
lnc-TARDBP-8	238	0	5	0.001	19.6066	14.2591	Up	0.0557238	0.118481
lnc-EIF4ENIF1-5	238	0	5	0.001	19.6066	14.2591	Up	0.0557238	0.117461
lnc-TMC3-2	476	0	10	0.001	19.6066	14.2591	Up	0.0028198	0.00995337
lnc-KB-1507C5.2.1-3	857	0	18	0.001	19.602	14.2587	Up	2.38e-05	0.000153559
SPRR1B	619	0	13	0.001	19.6003	14.2586	Up	0.000470676	0.0021199
SCAMP3	1572	0	33	0.001	19.5916	14.2579	Up	3.09e-09	4.75e-08
lnc-CCT5-26	286	0	6	0.001	19.5792	14.257	Up	0.0306814	0.0733804
lnc-SNX3-2	286	0	6	0.001	19.5792	14.257	Up	0.0306814	0.0718123
RPL23AP32	620	0	13	0.001	19.5686	14.2563	Up	0.000470676	0.00212625
lnc-TTLL7-10	954	0	20	0.001	19.5655	14.256	Up	7.22e-06	5.31e-05
C1QA	1098	0	23	0.001	19.5494	14.2548	Up	1.21e-06	1.07e-05
lnc-SRSF6-3	573	0	12	0.001	19.545	14.2545	Up	0.000854844	0.00351668
lnc-BAG4-1	621	0	13	0.001	19.5371	14.2539	Up	0.000470676	0.00214811
RPN1	2341	0	49	0.001	19.5346	14.2537	Up	2.2e-13	6.98e-12
lnc-TNP1-3	430	0	9	0.001	19.5336	14.2537	Up	0.00512132	0.0166955
lnc-NDUFA4-3	478	0	10	0.001	19.5246	14.253	Up	0.0028198	0.0100195
lnc-CD97-1	765	0	16	0.001	19.5195	14.2526	Up	7.86e-05	0.000439073
lnc-SLC39A7-2	1291	0	27	0.001	19.5185	14.2526	Up	1.11e-07	1.24e-06
lnc-N4BP2-3	530	0	12	0.001	19.5109	14.252	Up	0.000854844	0.00360894
lnc-IL28RA-1	1388	0	29	0.001	19.4992	14.2511	Up	3.36e-08	4.22e-07
lnc-AC006547.14.1-2	766	0	16	0.001	19.494	14.2507	Up	7.86e-05	0.000434967
lnc-KLF5-2	431	0	9	0.001	19.4883	14.2503	Up	0.00512132	0.016678
lnc-SFRP1-1	240	0	5	0.001	19.4432	14.247	Up	0.0557238	0.117906
lnc-ETAA1-4	976	0	21	0.001	19.4432	14.247	Up	3.98e-06	3.15e-05
lnc-ANKRD54-3	864	0	18	0.001	19.4432	14.247	Up	2.38e-05	0.000153241
lnc-CEP152-2	864	0	18	0.001	19.4432	14.247	Up	2.38e-05	0.000153182
lnc-SLC47A1-3	913	0	19	0.001	19.4219	14.2454	Up	1.31e-05	9.03e-05
lnc-MYB-2	577	0	12	0.001	19.4095	14.2445	Up	0.000854844	0.00351581
RNF133	1443	0	30	0.001	19.4028	14.244	Up	1.85e-08	2.44e-07
S100A2	962	0	20	0.001	19.4028	14.244	Up	7.22e-06	5.29e-05
lnc-C9orf103-3	1395	0	29	0.001	19.4014	14.2439	Up	3.36e-08	4.2e-07
lnc-GALNT2-2	818	0	17	0.001	19.3957	14.2434	Up	4.33e-05	0.000262748
lnc-RABEPK-5	385	0	8	0.001	19.3927	14.2432	Up	0.00930136	0.0271682
lnc-PDLIM4-4	674	0	14	0.001	19.3855	14.2427	Up	0.000259154	0.00127206
lnc-EXT1-5	963	0	20	0.001	19.3826	14.2425	Up	7.22e-06	5.3e-05
lnc-XRCC2-7	289	0	6	0.001	19.3759	14.242	Up	0.0306814	0.0733099
lnc-BCOR-1	1976	0	41	0.001	19.3645	14.2411	Up	2.61e-11	5.81e-10
lnc-GRB10-1	482	0	10	0.001	19.3625	14.241	Up	0.0028198	0.00999808
lnc-VAX2-2	434	0	9	0.001	19.3536	14.2403	Up	0.00512132	0.0166008
lnc-AF127577.1-8	772	0	16	0.001	19.3425	14.2395	Up	7.86e-05	0.000438137
lnc-CTD-2523D13.1.1-5	579	0	12	0.001	19.3425	14.2395	Up	0.000854844	0.00354041
lnc-SNW1-3	386	0	8	0.001	19.3425	14.2395	Up	0.00930136	0.0267054
lnc-SESN1-2	338	0	7	0.001	19.3282	14.2384	Up	0.0168932	0.0447295
lnc-CAPN9-2	290	0	6	0.001	19.3091	14.237	Up	0.0306814	0.0733592
lnc-CDK13-5	290	0	6	0.001	19.3091	14.237	Up	0.0306814	0.0728617
lnc-IFNA8-2	580	0	12	0.001	19.3091	14.237	Up	0.000854844	0.00352895
lnc-PTPRA-1	290	0	6	0.001	19.3091	14.237	Up	0.0306814	0.0713489
lnc-EID2B-1	2079	0	43	0.001	19.3029	14.2365	Up	7.9e-12	1.95e-10
lnc-ARHGEF26-6	387	0	8	0.001	19.2925	14.2358	Up	0.00930136	0.02669
lnc-AC016251.1-21	1258	0	26	0.001	19.2886	14.2355	Up	2.01e-07	2.16e-06
lnc-NEUROD2-2	242	0	5	0.001	19.2825	14.235	Up	0.0557238	0.116322
lnc-C21orf119-2	242	0	5	0.001	19.2825	14.235	Up	0.0557238	0.114439
lnc-FAM27B-10	581	0	12	0.001	19.2759	14.2345	Up	0.000854844	0.00353452
lnc-ARMC1-3	1840	0	38	0.001	19.2741	14.2344	Up	1.56e-10	3.04e-09
lnc-DDX1-1	533	0	11	0.001	19.2608	14.2334	Up	0.00155257	0.00593348
lnc-TRAFD1-2	291	0	6	0.001	19.2428	14.232	Up	0.0306814	0.0715698
lnc-ELOVL4-1	485	0	10	0.001	19.2428	14.232	Up	0.0028198	0.00980786
lnc-CHST1-4	534	0	11	0.001	19.2247	14.2307	Up	0.00155257	0.0060214
lnc-CIDEA-2	971	0	20	0.001	19.2229	14.2305	Up	7.22e-06	5.31e-05
lnc-TAF4B-3	437	0	9	0.001	19.2207	14.2304	Up	0.00512132	0.0162554
lnc-AHI1-7	777	0	16	0.001	19.218	14.2302	Up	7.86e-05	0.000442504
lnc-AL901608.1-39	340	0	7	0.001	19.2145	14.2299	Up	0.0168932	0.0448321
lnc-UBE3A-4	340	0	7	0.001	19.2145	14.2299	Up	0.0168932	0.0439433
lnc-KLHL20-3	340	0	7	0.001	19.2145	14.2299	Up	0.0168932	0.0437967
lnc-EME2-2	2235	0	46	0.001	19.2083	14.2294	Up	1.32e-12	3.63e-11
lnc-MED10-16	486	0	10	0.001	19.2032	14.2291	Up	0.0028198	0.0101018
lnc-IL36RN-2	535	0	11	0.001	19.1888	14.228	Up	0.00155257	0.00605161
lnc-DHTKD1-1	292	0	6	0.001	19.1769	14.2271	Up	0.0306814	0.0721417
lnc-SPATS2-1	438	0	9	0.001	19.1769	14.2271	Up	0.00512132	0.0162388
lnc-ELAVL4-8	584	0	12	0.001	19.1769	14.2271	Up	0.000854844	0.00351552
lnc-CEP85-1	2192	0	45	0.001	19.1594	14.2258	Up	2.4e-12	6.41e-11
lnc-APBB1IP-5	780	0	16	0.001	19.1441	14.2246	Up	7.86e-05	0.000442906
lnc-PTER-1	780	0	16	0.001	19.1441	14.2246	Up	7.86e-05	0.000442054
lnc-APH1A-1	585	0	12	0.001	19.1441	14.2246	Up	0.000854844	0.0035852
lnc-KB-1980E6.3.1-4	975	0	20	0.001	19.1441	14.2246	Up	7.22e-06	5.32e-05
lnc-C16orf61-2	829	0	17	0.001	19.1383	14.2242	Up	4.33e-05	0.000260615
lnc-SEC23A-3	634	0	13	0.001	19.1365	14.224	Up	0.000470676	0.00214988
lnc-DYRK2-9	488	0	10	0.001	19.1245	14.2231	Up	0.0028198	0.010026
lnc-IPO5-1	871	0	16	0.001	19.1196	14.2228	Up	7.86e-05	0.000442956
lnc-PRKD1-15	1318	0	27	0.001	19.1187	14.2227	Up	1.11e-07	1.26e-06
lnc-ZNF680-4	928	0	19	0.001	19.108	14.2219	Up	1.31e-05	8.99e-05
lnc-PPP6R1-1	391	0	8	0.001	19.0951	14.2209	Up	0.00930136	0.0274471
lnc-TRIO-1	538	0	11	0.001	19.0818	14.2199	Up	0.00155257	0.00597526
FAM166B	1076	0	22	0.001	19.0818	14.2199	Up	2.19e-06	1.83e-05
lnc-AP4B1-1	1321	0	27	0.001	19.0752	14.2194	Up	1.11e-07	1.24e-06
lnc-MXD3-1	245	0	5	0.001	19.0464	14.2172	Up	0.0557238	0.118264
lnc-GGCX-5	294	0	6	0.001	19.0464	14.2172	Up	0.0306814	0.0732254
lnc-HLA-DRB5-1	343	0	7	0.001	19.0464	14.2172	Up	0.0168932	0.0444926
lnc-DDX27-6	343	0	7	0.001	19.0464	14.2172	Up	0.0168932	0.0433581
lnc-UBLCP1-3	638	0	13	0.001	19.0165	14.215	Up	0.000470676	0.00213537
lnc-TMEM132B-10	540	0	11	0.001	19.0111	14.2146	Up	0.00155257	0.00603316
lnc-ACP5-1	491	0	10	0.001	19.0076	14.2143	Up	0.0028198	0.0100786
lnc-PLAU-1	442	0	9	0.001	19.0033	14.214	Up	0.00512132	0.0164869
lnc-AC233263.1-11	442	0	9	0.001	19.0033	14.214	Up	0.00512132	0.0162876
lnc-STAG3L4-6	1032	0	21	0.001	18.991	14.213	Up	3.98e-06	3.14e-05
lnc-TAF1A-4	295	0	6	0.001	18.9818	14.2123	Up	0.0306814	0.0721895
lnc-C9orf171-2	541	0	11	0.001	18.976	14.2119	Up	0.00155257	0.00602892
lnc-FANCI-5	787	0	16	0.001	18.9738	14.2117	Up	7.86e-05	0.000443459
lnc-NDUFAF2-6	591	0	12	0.001	18.9497	14.2099	Up	0.000854844	0.00360618
lnc-CYB561-2	591	0	12	0.001	18.9497	14.2099	Up	0.000854844	0.00360374
lnc-RAB23-7	690	0	14	0.001	18.936	14.2088	Up	0.000259154	0.00126993
lnc-RPS24-2	345	0	7	0.001	18.936	14.2088	Up	0.0168932	0.0436828
lnc-CTD-2014B16.3.1-3	1479	0	30	0.001	18.9305	14.2084	Up	1.85e-08	2.43e-07
lnc-REST-8	296	0	6	0.001	18.9177	14.2074	Up	0.0306814	0.0724741
lnc-DCAF10-2	1037	0	21	0.001	18.8995	14.2061	Up	3.98e-06	3.14e-05
lnc-RAET1E-2	247	0	5	0.001	18.8922	14.2055	Up	0.0557238	0.119292
lnc-TTPA-10	247	0	5	0.001	18.8922	14.2055	Up	0.0557238	0.117045
lnc-LRRN3-2	2471	0	50	0.001	18.8845	14.2049	Up	1.21e-13	4.03e-12
lnc-AC091132.2-8	544	0	11	0.001	18.8713	14.2039	Up	0.00155257	0.00603694
lnc-HAND1-8	544	0	11	0.001	18.8713	14.2039	Up	0.00155257	0.00603458
lnc-CDH6-4	544	0	11	0.001	18.8713	14.2039	Up	0.00155257	0.00598964
lnc-KIAA0226-8	544	0	11	0.001	18.8713	14.2039	Up	0.00155257	0.00598638
lnc-CLIC5-3	396	0	8	0.001	18.854	14.2026	Up	0.00930136	0.0275304
lnc-LRRC27-1	297	0	6	0.001	18.854	14.2026	Up	0.0306814	0.0726916
lnc-FBXW7-8	297	0	6	0.001	18.854	14.2026	Up	0.0306814	0.0721929
lnc-INO80D-5	892	0	18	0.001	18.8329	14.201	Up	2.38e-05	0.000155128
lnc-AC110080.1-17	347	0	7	0.001	18.8268	14.2005	Up	0.0168932	0.0437784
CST2	694	0	14	0.001	18.8268	14.2005	Up	0.000259154	0.00124671
OR1G1	942	0	19	0.001	18.824	14.2003	Up	1.31e-05	9e-05
lnc-EIF2S3L.1-4	595	0	12	0.001	18.8223	14.2002	Up	0.000854844	0.00352076
lnc-PCP2-1	843	0	17	0.001	18.8205	14.2	Up	4.33e-05	0.00026182
lnc-PRAGMIN.1-11	744	0	15	0.001	18.816	14.1997	Up	0.00014269	0.000743782
MT1H	397	0	8	0.001	18.8065	14.1989	Up	0.00930136	0.0275698
lnc-DLK1-12	943	0	19	0.001	18.804	14.1988	Up	1.31e-05	9.09e-05
lnc-CCNL2-4	695	0	14	0.001	18.7998	14.1984	Up	0.000259154	0.00126519
lnc-ETS2-4	447	0	9	0.001	18.7907	14.1977	Up	0.00512132	0.0166181
lnc-TOPBP1-1	894	0	18	0.001	18.7907	14.1977	Up	2.38e-05	0.000153221
lnc-PSIP1-2	298	0	6	0.001	18.7907	14.1977	Up	0.0306814	0.0715195
lnc-AC010336.1-6	497	0	10	0.001	18.7781	14.1968	Up	0.0028198	0.00981404
lnc-DIAPH3-18	348	0	7	0.001	18.7727	14.1964	Up	0.0168932	0.0441906
lnc-CST9LP1-2	746	0	15	0.001	18.7656	14.1958	Up	0.00014269	0.000740831
lnc-CCDC8-3	448	0	9	0.001	18.7488	14.1945	Up	0.00512132	0.0164178
lnc-ARHGEF26-7	249	0	5	0.001	18.7404	14.1939	Up	0.0557238	0.117731
lnc-BEST3-5	249	0	5	0.001	18.7404	14.1939	Up	0.0557238	0.117163
lnc-PPP1R9A-3	299	0	6	0.001	18.7279	14.1929	Up	0.0306814	0.0736887
lnc-HOMER3-1	299	0	6	0.001	18.7279	14.1929	Up	0.0306814	0.0730291
lnc-CWH43-1	299	0	6	0.001	18.7279	14.1929	Up	0.0306814	0.0730082
lnc-PLDN-2	299	0	6	0.001	18.7279	14.1929	Up	0.0306814	0.0729523
lnc-SFPQ-6	299	0	6	0.001	18.7279	14.1929	Up	0.0306814	0.0716605
lnc-FAM83F-5	648	0	13	0.001	18.7231	14.1925	Up	0.000470676	0.0021381
lnc-CRYBA1-3	449	0	9	0.001	18.707	14.1913	Up	0.00512132	0.0162928
lnc-XRN2-7	449	0	9	0.001	18.707	14.1913	Up	0.00512132	0.0162202
lnc-DHX37-10	1946	0	39	0.001	18.7038	14.191	Up	8.6e-11	1.75e-09
lnc-AC011443.1-2	549	0	11	0.001	18.6995	14.1907	Up	0.00155257	0.00600267
lnc-C2orf40-14	649	0	13	0.001	18.6942	14.1903	Up	0.000470676	0.0021307
lnc-TMEM116-2	400	0	8	0.001	18.6655	14.1881	Up	0.00930136	0.0275451
lnc-VWA2-2	250	0	5	0.001	18.6655	14.1881	Up	0.0557238	0.118918
lnc-TAOK3-5	450	0	9	0.001	18.6655	14.1881	Up	0.00512132	0.0166486
lnc-CCDC84-1	300	0	6	0.001	18.6655	14.1881	Up	0.0306814	0.0736389
lnc-OCA2-2	1100	0	22	0.001	18.6655	14.1881	Up	2.19e-06	1.85e-05
lnc-PHKA2-1	700	0	14	0.001	18.6655	14.1881	Up	0.000259154	0.00125594
lnc-KIAA1462-2	2501	0	50	0.001	18.658	14.1875	Up	1.21e-13	4.04e-12
OR2K2	951	0	19	0.001	18.6458	14.1866	Up	1.31e-05	9.1e-05
lnc-ZNF724P-4	901	0	18	0.001	18.6448	14.1865	Up	2.38e-05	0.00015338
lnc-TRAFD1-1	751	0	15	0.001	18.6406	14.1862	Up	0.00014269	0.000744328
TMEM239	701	0	14	0.001	18.6388	14.186	Up	0.000259154	0.00124864
lnc-SACS-6	651	0	13	0.001	18.6368	14.1859	Up	0.000470676	0.00213654
lnc-PCNX-4	551	0	11	0.001	18.6316	14.1855	Up	0.00155257	0.00592255
lnc-AC012414.1-5	401	0	8	0.001	18.6189	14.1845	Up	0.00930136	0.0265918
lnc-ZNF608-12	602	0	12	0.001	18.6035	14.1833	Up	0.000854844	0.00352164
lnc-ZNF90-1	301	0	6	0.001	18.6035	14.1833	Up	0.0306814	0.0711991
lnc-VPREB1-18	301	0	6	0.001	18.6035	14.1833	Up	0.0306814	0.0711294
lnc-XRCC4-7	301	0	6	0.001	18.6035	14.1833	Up	0.0306814	0.0710896
lnc-SULF1-1	552	0	11	0.001	18.5978	14.1828	Up	0.00155257	0.00597758
MRPL27	703	0	14	0.001	18.5858	14.1819	Up	0.000259154	0.00125496
lnc-ANGPTL4-2	653	0	13	0.001	18.5797	14.1814	Up	0.000470676	0.00214103
lnc-PLA2G2E-1	1306	0	26	0.001	18.5797	14.1814	Up	2.01e-07	2.13e-06
lnc-MKI67-6	201	0	4	0.001	18.5726	14.1809	Up	0.101206	0.184974
lnc-MRPL39-16	352	0	7	0.001	18.5594	14.1799	Up	0.0168932	0.0442768
lnc-GATAD2A-1	654	0	13	0.001	18.5513	14.1792	Up	0.000470676	0.00210939
lnc-UCK2-5	302	0	6	0.001	18.5419	14.1785	Up	0.0306814	0.0728965
lnc-C16orf5-1	1662	0	33	0.001	18.5307	14.1776	Up	3.09e-09	4.77e-08
lnc-UXS1-7	554	0	11	0.001	18.5307	14.1776	Up	0.00155257	0.00602046
ZNF491	2823	0	56	0.001	18.5134	14.1763	Up	3.38e-15	1.42e-13
lnc-MMP11-1	605	0	12	0.001	18.5112	14.1761	Up	0.000854844	0.00356027
lnc-FXYD4-2	1412	0	28	0.001	18.5068	14.1758	Up	6.1e-08	7.23e-07
lnc-CABP4-1	353	0	7	0.001	18.5068	14.1758	Up	0.0168932	0.0437124
lnc-AC104537.1-2	454	0	9	0.001	18.501	14.1753	Up	0.00512132	0.0164997
lnc-NOM1-9	454	0	9	0.001	18.501	14.1753	Up	0.00512132	0.0162886
lnc-C10orf103-7	656	0	13	0.001	18.4948	14.1748	Up	0.000470676	0.00211072
lnc-KCNH5-9	202	0	4	0.001	18.4807	14.1737	Up	0.101206	0.18305
lnc-ZNF470-3	758	0	15	0.001	18.4685	14.1728	Up	0.00014269	0.000750468
lnc-EMX2-5	553	0	11	0.001	18.464	14.1724	Up	0.00155257	0.00605968
lnc-CHRM4-1	272	0	7	0.001	18.4546	14.1717	Up	0.0168932	0.0441581
lnc-SSH1-2	506	0	10	0.001	18.4441	14.1709	Up	0.0028198	0.0100807
lnc-CTD-2144E22.5.1-22	253	0	5	0.001	18.4441	14.1709	Up	0.0557238	0.115205
lnc-CLINT1-6	1670	0	33	0.001	18.4419	14.1707	Up	3.09e-09	4.73e-08
lnc-RNASEH1-7	405	0	8	0.001	18.435	14.1702	Up	0.00930136	0.0273821
lnc-CMTM7-1	456	0	9	0.001	18.4199	14.169	Up	0.00512132	0.0166605
lnc-LRRC8B-4	304	0	6	0.001	18.4199	14.169	Up	0.0306814	0.0729837
OR4X2	912	0	18	0.001	18.4199	14.169	Up	2.38e-05	0.000152511
ERP27	1571	0	31	0.001	18.416	14.1687	Up	1.02e-08	1.41e-07
lnc-PNPLA5-4	862	0	17	0.001	18.4056	14.1679	Up	4.33e-05	0.000262267
lnc-VIM-1	1826	0	36	0.001	18.3997	14.1674	Up	5.15e-10	9.25e-09
lnc-ATG4D-2	203	0	4	0.001	18.3896	14.1666	Up	0.101206	0.191099
MIXL1	2030	0	40	0.001	18.3896	14.1666	Up	4.73e-11	1.01e-09
lnc-PMVK-4	203	0	4	0.001	18.3896	14.1666	Up	0.101206	0.186006
lnc-SH2D6-3	457	0	9	0.001	18.3796	14.1658	Up	0.00512132	0.0163126
lnc-OR5H1-1	508	0	10	0.001	18.3715	14.1652	Up	0.0028198	0.00982298
lnc-ASB1-5	254	0	5	0.001	18.3715	14.1652	Up	0.0557238	0.113917
lnc-ZNF441-1	560	0	11	0.001	18.3322	14.1621	Up	0.00155257	0.00602234
lnc-AC136428.1.1-4	560	0	11	0.001	18.3322	14.1621	Up	0.00155257	0.00595269
lnc-MLST8-3	662	0	13	0.001	18.3271	14.1617	Up	0.000470676	0.00210768
KRTAP2-4	764	0	15	0.001	18.3234	14.1614	Up	0.00014269	0.000751422
lnc-AL033381.1-10	764	0	15	0.001	18.3234	14.1614	Up	0.00014269	0.000742071
lnc-KLHL25-17	1835	0	36	0.001	18.3095	14.1603	Up	5.15e-10	9.26e-09
lnc-RPL31-5	255	0	5	0.001	18.2995	14.1595	Up	0.0557238	0.119102
lnc-GSTT2-1	663	0	13	0.001	18.2995	14.1595	Up	0.000470676	0.00212529
lnc-TSPAN15-1	1275	0	25	0.001	18.2995	14.1595	Up	3.65e-07	3.65e-06
lnc-CIAO1-2	204	0	4	0.001	18.2995	14.1595	Up	0.101206	0.183664
lnc-KIF11-2	255	0	5	0.001	18.2995	14.1595	Up	0.0557238	0.114006
AQP6	2654	0	52	0.001	18.2857	14.1584	Up	3.68e-14	1.31e-12
lnc-C11orf44-4	562	0	11	0.001	18.2669	14.1569	Up	0.00155257	0.00593211
SNTN	1584	0	31	0.001	18.2648	14.1568	Up	1.02e-08	1.42e-07
lnc-JMJD1C-6	511	0	10	0.001	18.2637	14.1567	Up	0.0028198	0.00985127
TWIST2	1176	0	23	0.001	18.2528	14.1558	Up	1.21e-06	1.09e-05
lnc-COX4I2-1	2557	0	50	0.001	18.2494	14.1556	Up	1.21e-13	4.03e-12
lnc-IGF1R-3	665	0	13	0.001	18.2444	14.1552	Up	0.000470676	0.00211453
lnc-C6orf221-5	614	0	12	0.001	18.2399	14.1548	Up	0.000854844	0.00353423
lnc-TPPP-1	2918	0	57	0.001	18.2305	14.1541	Up	1.86e-15	8.16e-14
lnc-ARHGAP26-6	512	0	10	0.001	18.228	14.1539	Up	0.0028198	0.00990835
lnc-AC017028.1-7	1024	0	20	0.001	18.228	14.1539	Up	7.22e-06	5.33e-05
lnc-KIF2B-2	768	0	15	0.001	18.228	14.1539	Up	0.00014269	0.000741373
lnc-ZNF485-7	512	0	10	0.001	18.228	14.1539	Up	0.0028198	0.00987138
lnc-C17orf78-1	410	0	8	0.001	18.2102	14.1525	Up	0.00930136	0.0276291
lnc-KLHL25-9	820	0	16	0.001	18.2102	14.1525	Up	7.86e-05	0.00044036
lnc-TMEM18-4	410	0	8	0.001	18.2102	14.1525	Up	0.00930136	0.0270854
lnc-FAM27B-5	205	0	4	0.001	18.2102	14.1525	Up	0.101206	0.185883
lnc-SLITRK3-1	1948	0	38	0.001	18.2055	14.1521	Up	1.56e-10	3.03e-09
lnc-CREB1-3	564	0	11	0.001	18.2021	14.1518	Up	0.00155257	0.00600034
lnc-TRAT1-1	564	0	11	0.001	18.2021	14.1518	Up	0.00155257	0.00599941
lnc-PARP11-3	359	0	7	0.001	18.1975	14.1515	Up	0.0168932	0.0434411
lnc-TSSC1-7	718	0	14	0.001	18.1975	14.1515	Up	0.000259154	0.00124852
lnc-COL8A1-9	308	0	6	0.001	18.1807	14.1501	Up	0.0306814	0.0737671
lnc-MXD4-2	308	0	6	0.001	18.1807	14.1501	Up	0.0306814	0.0724603
lnc-SLC3A2-1	565	0	11	0.001	18.1699	14.1493	Up	0.00155257	0.00589182
lnc-ORM1-1	514	0	10	0.001	18.1571	14.1482	Up	0.0028198	0.0100252
lnc-PAX5-7	257	0	5	0.001	18.1571	14.1482	Up	0.0557238	0.116274
lnc-RAB1A-5	771	0	15	0.001	18.1571	14.1482	Up	0.00014269	0.000737827
lnc-PSMD14-3	566	0	11	0.001	18.1378	14.1467	Up	0.00155257	0.00588598
lnc-RP11-419C23.1.1-9	206	0	4	0.001	18.1218	14.1454	Up	0.101206	0.184852
lnc-CTSL1-3	721	0	14	0.001	18.1218	14.1454	Up	0.000259154	0.00124961
NAP1L5	1958	0	38	0.001	18.1126	14.1447	Up	1.56e-10	3.03e-09
lnc-KDM4C-17	1959	0	38	0.001	18.1033	14.144	Up	1.56e-10	3.03e-09
lnc-LPHN2-11	619	0	12	0.001	18.0925	14.1431	Up	0.000854844	0.00354484
lnc-DIAPH2-4	258	0	5	0.001	18.0867	14.1426	Up	0.0557238	0.117711
lnc-H3F3C-7	413	0	8	0.001	18.0779	14.1419	Up	0.00930136	0.0276093
lnc-NBAS-8	568	0	11	0.001	18.074	14.1416	Up	0.00155257	0.00593758
OR2AP1	930	0	18	0.001	18.0634	14.1408	Up	2.38e-05	0.000153499
lnc-FAM50A-1	1189	0	23	0.001	18.0532	14.14	Up	1.21e-06	1.07e-05
lnc-ZFAND2A-2	569	0	11	0.001	18.0422	14.1391	Up	0.00155257	0.00599801
lnc-KIF20A-1	414	0	8	0.001	18.0343	14.1385	Up	0.00930136	0.0269686
lnc-NQO2-4	932	0	18	0.001	18.0246	14.1377	Up	2.38e-05	0.00015434
lnc-ZNF785-1	259	0	5	0.001	18.0169	14.1371	Up	0.0557238	0.118944
lnc-RAD54L2-2	570	0	11	0.001	18.0105	14.1366	Up	0.00155257	0.00597203
lnc-RP11-116D17.1.1-12	622	0	12	0.001	18.0053	14.1361	Up	0.000854844	0.0035193
lnc-DGKI-1	2696	0	52	0.001	18.0008	14.1358	Up	3.68e-14	1.32e-12
lnc-TARDBP-7	363	0	7	0.001	17.997	14.1355	Up	0.0168932	0.044928
lnc-FLOT2-2	467	0	9	0.001	17.986	14.1346	Up	0.00512132	0.016246
lnc-LILRB5-3	779	0	15	0.001	17.9706	14.1334	Up	0.00014269	0.000741295
lnc-LSM14B-5	2493	0	48	0.001	17.9692	14.1332	Up	4e-13	1.22e-11
DRICH1	1300	0	25	0.001	17.9476	14.1315	Up	3.65e-07	3.69e-06
lnc-FAM201A-8	364	0	7	0.001	17.9476	14.1315	Up	0.0168932	0.0448034
lnc-CTD-2144E22.5.1-10	364	0	7	0.001	17.9476	14.1315	Up	0.0168932	0.0446036
lnc-CMYA5-6	312	0	6	0.001	17.9476	14.1315	Up	0.0306814	0.0724087
lnc-TAF6-1	572	0	11	0.001	17.9476	14.1315	Up	0.00155257	0.00595682
lnc-GLT25D2-2	521	0	10	0.001	17.9131	14.1287	Up	0.0028198	0.0100217
lnc-TMEM72-3	521	0	10	0.001	17.9131	14.1287	Up	0.0028198	0.00996893
LINC00837	4014	0	77	0.001	17.9029	14.1279	Up	1.22e-20	9.91e-19
lnc-ZPLD1-3	365	0	7	0.001	17.8984	14.1275	Up	0.0168932	0.0447604
lnc-SCAMP5-2	313	0	6	0.001	17.8902	14.1269	Up	0.0306814	0.0729558
lnc-CYB5R4-3	835	0	16	0.001	17.8831	14.1263	Up	7.86e-05	0.00044031
lnc-NOL11-2	1044	0	20	0.001	17.8788	14.126	Up	7.22e-06	5.37e-05
lnc-SLC2A9-2	261	0	5	0.001	17.8788	14.126	Up	0.0557238	0.118269
lnc-PREP-4	261	0	5	0.001	17.8788	14.126	Up	0.0557238	0.116621
lnc-CNTN2-5	522	0	10	0.001	17.8788	14.126	Up	0.0028198	0.00986375
lnc-PLA2G4A-1	1097	0	21	0.001	17.8658	14.1249	Up	3.98e-06	3.16e-05
lnc-FAM71F2-7	209	0	4	0.001	17.8617	14.1246	Up	0.101206	0.188465
lnc-CDK20-10	2090	0	40	0.001	17.8617	14.1246	Up	4.73e-11	1.01e-09
lnc-SLC19A1-6	209	0	4	0.001	17.8617	14.1246	Up	0.101206	0.185165
lnc-TMEM17-5	366	0	7	0.001	17.8495	14.1236	Up	0.0168932	0.0440539
lnc-UPF3A-3	471	0	9	0.001	17.8333	14.1223	Up	0.00512132	0.0166856
lnc-KLHL20-4	1256	0	24	0.001	17.8333	14.1223	Up	6.64e-07	6.27e-06
lnc-EFNA2-1	1256	0	24	0.001	17.8333	14.1223	Up	6.64e-07	6.25e-06
lnc-CTR9-6	1833	0	35	0.001	17.8203	14.1212	Up	9.36e-10	1.6e-08
lnc-ARHGAP15-18	524	0	10	0.001	17.8106	14.1204	Up	0.0028198	0.00993503
lnc-C19orf46-2	262	0	5	0.001	17.8106	14.1204	Up	0.0557238	0.116196
lnc-AIFM2-1	524	0	10	0.001	17.8106	14.1204	Up	0.0028198	0.00980375
lnc-SLC35B4-6	367	0	7	0.001	17.8009	14.1197	Up	0.0168932	0.0433671
lnc-SMAD9-2	472	0	9	0.001	17.7955	14.1192	Up	0.00512132	0.0165695
lnc-IL17B-4	472	0	9	0.001	17.7955	14.1192	Up	0.00512132	0.0162855
lnc-TDRD3-2	577	0	11	0.001	17.792	14.1189	Up	0.00155257	0.00605683
lnc-AC022098.1-3	315	0	6	0.001	17.7766	14.1177	Up	0.0306814	0.0737885
lnc-CHP2.1-3	210	0	4	0.001	17.7766	14.1177	Up	0.101206	0.187364
lnc-AL901608.1-67	420	0	8	0.001	17.7766	14.1177	Up	0.00930136	0.0271586
lnc-MZT2B-2	578	0	11	0.001	17.7613	14.1164	Up	0.00155257	0.00602516
lnc-MEGF11-1	578	0	11	0.001	17.7613	14.1164	Up	0.00155257	0.00598871
lnc-MTMR9-3	2260	0	43	0.001	17.757	14.1161	Up	7.9e-12	1.94e-10
lnc-DHX9-1	631	0	12	0.001	17.7485	14.1154	Up	0.000854844	0.00355908
MILR1	631	0	12	0.001	17.7485	14.1154	Up	0.000854844	0.00354928
lnc-AC099552.4.1-4	894	0	17	0.001	17.7468	14.1153	Up	4.33e-05	0.000260299
lnc-MBLAC1-2	684	0	13	0.001	17.7377	14.1145	Up	0.000470676	0.00213634
lnc-PSG9-1	421	0	8	0.001	17.7344	14.1143	Up	0.00930136	0.0273432
CRYGS	842	0	16	0.001	17.7344	14.1143	Up	7.86e-05	0.000440956
lnc-ZNF354A-2	316	0	6	0.001	17.7204	14.1131	Up	0.0306814	0.0721042
lnc-TTR-2	316	0	6	0.001	17.7204	14.1131	Up	0.0306814	0.0709837
lnc-ATRN-3	211	0	4	0.001	17.6924	14.1108	Up	0.101206	0.181538
lnc-LIMD1-1	950	0	18	0.001	17.6831	14.1101	Up	2.38e-05	0.000153162
lnc-TRIB2-5	1795	0	34	0.001	17.6776	14.1096	Up	1.7e-09	2.78e-08
lnc-PURG-3	264	0	5	0.001	17.6756	14.1095	Up	0.0557238	0.11534
lnc-CAPZA2-1	264	0	5	0.001	17.6756	14.1095	Up	0.0557238	0.11434
lnc-ZNF24-1	581	0	11	0.001	17.6696	14.109	Up	0.00155257	0.00594902
DNAJC14	3330	0	63	0.001	17.6565	14.1079	Up	5.18e-17	2.78e-15
lnc-TMEM132C-5	423	0	8	0.001	17.6506	14.1074	Up	0.00930136	0.0270332
lnc-DTL-4	476	0	9	0.001	17.6459	14.107	Up	0.00512132	0.0164157
OR51M1	1058	0	20	0.001	17.6422	14.1067	Up	7.22e-06	5.35e-05
lnc-SOD3-10	1376	0	26	0.001	17.6345	14.1061	Up	2.01e-07	2.13e-06
lnc-NAA35-9	1218	0	23	0.001	17.6234	14.1052	Up	1.21e-06	1.08e-05
lnc-ST14-1	265	0	5	0.001	17.6089	14.104	Up	0.0557238	0.116626
lnc-POU3F3-12	212	0	4	0.001	17.6089	14.104	Up	0.101206	0.186399
lnc-ARHGAP42-1	265	0	5	0.001	17.6089	14.104	Up	0.0557238	0.11572
lnc-ANK2-5	424	0	8	0.001	17.6089	14.104	Up	0.00930136	0.0269733
lnc-DCT-1	637	0	12	0.001	17.5813	14.1018	Up	0.000854844	0.0035475
lnc-PRCD-1	1381	0	26	0.001	17.5707	14.1009	Up	2.01e-07	2.13e-06
lnc-WDR1-7	850	0	16	0.001	17.5675	14.1006	Up	7.86e-05	0.000443408
lnc-PDCD2L-4	425	0	8	0.001	17.5675	14.1006	Up	0.00930136	0.0266916
lnc-SCN4B-3	425	0	8	0.001	17.5675	14.1006	Up	0.00930136	0.0266792
lnc-ZFAT-10	797	0	15	0.001	17.5648	14.1004	Up	0.00014269	0.000738287
HIST1H4A	372	0	7	0.001	17.5616	14.1001	Up	0.0168932	0.0447152
lnc-FOXA2-7	691	0	13	0.001	17.558	14.0998	Up	0.000470676	0.00213381
lnc-C11orf92-4	691	0	13	0.001	17.558	14.0998	Up	0.000470676	0.00211817
PXMP2	957	0	18	0.001	17.5537	14.0995	Up	2.38e-05	0.000154622
lnc-GEMIN4-1	1755	0	33	0.001	17.5487	14.0991	Up	3.09e-09	4.77e-08
lnc-LMX1B-2	479	0	9	0.001	17.5354	14.098	Up	0.00512132	0.0165716
lnc-TIAF1-3	692	0	13	0.001	17.5326	14.0978	Up	0.000470676	0.00215206
lnc-SLC7A6-7	692	0	13	0.001	17.5326	14.0978	Up	0.000470676	0.00214123
lnc-LAMB3-4	426	0	8	0.001	17.5263	14.0972	Up	0.00930136	0.0267008
lnc-CNDP1-4	586	0	11	0.001	17.5188	14.0966	Up	0.00155257	0.00591711
lnc-NRL-4	746	0	14	0.001	17.5145	14.0963	Up	0.000259154	0.00127799
lnc-SLC7A6OS-1	533	0	10	0.001	17.5098	14.0959	Up	0.0028198	0.00977164
lnc-GADL1-6	640	0	12	0.001	17.4989	14.095	Up	0.000854844	0.0035855
lnc-EXOC1-3	320	0	6	0.001	17.4989	14.095	Up	0.0306814	0.0722955
lnc-SNPH-3	480	0	9	0.001	17.4989	14.095	Up	0.00512132	0.0163514
lnc-FGF9-4	320	0	6	0.001	17.4989	14.095	Up	0.0306814	0.0712722
lnc-LRP5L-6	747	0	14	0.001	17.4911	14.0943	Up	0.000259154	0.00125864
lnc-MTRR-4	854	0	16	0.001	17.4852	14.0938	Up	7.86e-05	0.000439666
lnc-BTBD17-5	267	0	5	0.001	17.477	14.0932	Up	0.0557238	0.115715
lnc-DNHD1-2	267	0	5	0.001	17.477	14.0932	Up	0.0557238	0.114577
lnc-MAN1C1-1	962	0	18	0.001	17.4625	14.092	Up	2.38e-05	0.000152688
APOPT1	2514	0	47	0.001	17.4478	14.0908	Up	7.26e-13	2.11e-11
lnc-ITGB3BP-6	642	0	12	0.001	17.4444	14.0905	Up	0.000854844	0.00357525
lnc-RNF170-8	214	0	4	0.001	17.4444	14.0905	Up	0.101206	0.18513
lnc-UGGT1-5	214	0	4	0.001	17.4444	14.0905	Up	0.101206	0.182764
lnc-ZKSCAN1-1	803	0	15	0.001	17.4335	14.0896	Up	0.00014269	0.000740058
lnc-CLEC12B-2	803	0	15	0.001	17.4335	14.0896	Up	0.00014269	0.000738595
lnc-MICALCL-1	482	0	9	0.001	17.4263	14.089	Up	0.00512132	0.0164592
lnc-CD300A-2	911	0	17	0.001	17.4156	14.0881	Up	4.33e-05	0.000258641
lnc-CHODL-6	268	0	5	0.001	17.4118	14.0878	Up	0.0557238	0.118319
lnc-PLA2G10-4	268	0	5	0.001	17.4118	14.0878	Up	0.0557238	0.114524
lnc-SUN1-1	536	0	10	0.001	17.4118	14.0878	Up	0.0028198	0.00980855
lnc-USP20-1	697	0	13	0.001	17.4068	14.0874	Up	0.000470676	0.00210806
lnc-PLAT-3	590	0	11	0.001	17.4	14.0868	Up	0.00155257	0.00600968
lnc-PRPS1L1-2	590	0	11	0.001	17.4	14.0868	Up	0.00155257	0.00590218
lnc-AC106017.3.1-3	1931	0	36	0.001	17.3992	14.0867	Up	5.15e-10	9.3e-09
lnc-PDGFC-1	322	0	6	0.001	17.3902	14.086	Up	0.0306814	0.0739136
lnc-PAFAH1B2-1	483	0	9	0.001	17.3902	14.086	Up	0.00512132	0.0163545
lnc-ARFGEF2-5	537	0	10	0.001	17.3794	14.0851	Up	0.0028198	0.0101025
TLCD1	1021	0	19	0.001	17.3675	14.0841	Up	1.31e-05	9.03e-05
lnc-CASP12-3	430	0	8	0.001	17.3632	14.0837	Up	0.00930136	0.0275632
lnc-SLC25A46-2	430	0	8	0.001	17.3632	14.0837	Up	0.00930136	0.0272241
lnc-AKIRIN1-2	215	0	4	0.001	17.3632	14.0837	Up	0.101206	0.183564
lnc-PITPNA-1	269	0	5	0.001	17.3471	14.0824	Up	0.0557238	0.119225
lnc-AL391137.1-3	538	0	10	0.001	17.3471	14.0824	Up	0.0028198	0.0100482
lnc-PXMP4-5	377	0	7	0.001	17.3287	14.0809	Up	0.0168932	0.0443259
lnc-RAD23B-3	465	0	7	0.001	17.3287	14.0809	Up	0.0168932	0.0438447
lnc-RP11-884K10.5.1-4	431	0	8	0.001	17.3229	14.0804	Up	0.00930136	0.0272707
lnc-STRN3-1	431	0	8	0.001	17.3229	14.0804	Up	0.00930136	0.027049
lnc-OXSM-4	701	0	13	0.001	17.3075	14.0791	Up	0.000470676	0.00215404
lnc-AMZ2-4	701	0	13	0.001	17.3075	14.0791	Up	0.000470676	0.00211779
lnc-SSX5-2	270	0	5	0.001	17.2828	14.0771	Up	0.0557238	0.118709
lnc-TTLL2-1	540	0	10	0.001	17.2828	14.0771	Up	0.0028198	0.0100374
lnc-TPRX1-2	540	0	10	0.001	17.2828	14.0771	Up	0.0028198	0.00996752
lnc-FAM57A-6	594	0	11	0.001	17.2828	14.0771	Up	0.00155257	0.00594215
lnc-PLXDC2-4	216	0	4	0.001	17.2828	14.0771	Up	0.101206	0.182731
lnc-PQLC1-1	756	0	14	0.001	17.2828	14.0771	Up	0.000259154	0.00124791
lnc-ZC3H12D-4	2053	0	38	0.001	17.2744	14.0764	Up	1.56e-10	3.04e-09
lnc-ITGA11-1	2216	0	41	0.001	17.2672	14.0758	Up	2.61e-11	5.81e-10
lnc-APOBEC3H-2	1081	0	20	0.001	17.2669	14.0757	Up	7.22e-06	5.36e-05
lnc-USP9X-5	1027	0	19	0.001	17.266	14.0756	Up	1.31e-05	8.91e-05
lnc-SMAD3-1	1784	0	33	0.001	17.2635	14.0754	Up	3.09e-09	4.77e-08
lnc-BCL11A-8	703	0	13	0.001	17.2583	14.075	Up	0.000470676	0.00214417
lnc-RRNAD1-1	649	0	12	0.001	17.2562	14.0748	Up	0.000854844	0.00357254
lnc-FBLN7-2	2272	0	42	0.001	17.2524	14.0745	Up	1.44e-11	3.37e-10
lnc-SLC12A3-2	2164	0	40	0.001	17.2509	14.0744	Up	4.73e-11	1.01e-09
LVCAT5	1624	0	30	0.001	17.2403	14.0735	Up	1.85e-08	2.43e-07
lnc-CDK17-2	379	0	7	0.001	17.2372	14.0732	Up	0.0168932	0.0448249
lnc-C12orf62-1	325	0	6	0.001	17.2297	14.0726	Up	0.0306814	0.0733134
lnc-NUP214-3	1409	0	26	0.001	17.2215	14.0719	Up	2.01e-07	2.15e-06
lnc-C1orf21-6	271	0	5	0.001	17.2191	14.0717	Up	0.0557238	0.116001
lnc-FNDC8-1	271	0	5	0.001	17.2191	14.0717	Up	0.0557238	0.11469
lnc-STAG1-4	271	0	5	0.001	17.2191	14.0717	Up	0.0557238	0.113772
lnc-AC079135.1.1-11	2548	0	47	0.001	17.215	14.0714	Up	7.26e-13	2.1e-11
lnc-SLC10A1-2	488	0	9	0.001	17.212	14.0711	Up	0.00512132	0.0166562
lnc-ZNF627-1	976	0	18	0.001	17.212	14.0711	Up	2.38e-05	0.00015334
lnc-C22orf15-2	488	0	9	0.001	17.212	14.0711	Up	0.00512132	0.0163064
lnc-RIOK2-7	434	0	8	0.001	17.2032	14.0704	Up	0.00930136	0.0270095
lnc-PRR7-2	434	0	8	0.001	17.2032	14.0704	Up	0.00930136	0.0269434
lnc-TBRG4-3	380	0	7	0.001	17.1919	14.0694	Up	0.0168932	0.0440632
lnc-NAIF1-1	380	0	7	0.001	17.1919	14.0694	Up	0.0168932	0.0438104
lnc-AVL9-4	923	0	17	0.001	17.1892	14.0692	Up	4.33e-05	0.000263005
lnc-DBN1-2	543	0	10	0.001	17.1874	14.0691	Up	0.0028198	0.0100626
lnc-MCCC1-2	543	0	10	0.001	17.1874	14.0691	Up	0.0028198	0.0100224
lnc-FAM27E1.1-4	543	0	10	0.001	17.1874	14.0691	Up	0.0028198	0.00996256
lnc-PSMG1-1	489	0	9	0.001	17.1768	14.0682	Up	0.00512132	0.0165619
lnc-KRT18-1	761	0	14	0.001	17.1693	14.0675	Up	0.000259154	0.00125717
lnc-RP11-116D17.1.1-9	435	0	8	0.001	17.1637	14.0671	Up	0.00930136	0.0274113
lnc-DAO-5	272	0	5	0.001	17.1558	14.0664	Up	0.0557238	0.117342
lnc-GPR137B-8	272	0	5	0.001	17.1558	14.0664	Up	0.0557238	0.115546
lnc-PRRC2C-2	3210	0	59	0.001	17.1536	14.0662	Up	5.64e-16	2.64e-14
lnc-PRNT-3	381	0	7	0.001	17.1468	14.0656	Up	0.0168932	0.0441233
lnc-LENG9-1	871	0	16	0.001	17.1439	14.0654	Up	7.86e-05	0.000438334
lnc-FAM120B-7	490	0	9	0.001	17.1418	14.0652	Up	0.00512132	0.0164677
lnc-RAB11FIP5-1	327	0	6	0.001	17.1243	14.0638	Up	0.0306814	0.0735254
DPPA2P3	1145	0	21	0.001	17.1168	14.0631	Up	3.98e-06	3.12e-05
lnc-RIN2-1	600	0	11	0.001	17.11	14.0626	Up	0.00155257	0.00606301
SNHG3	2346	0	43	0.001	17.106	14.0622	Up	7.9e-12	1.94e-10
lnc-SP110-4	1694	0	31	0.001	17.0788	14.0599	Up	1.02e-08	1.41e-07
lnc-EDIL3-4	656	0	12	0.001	17.0721	14.0594	Up	0.000854844	0.00361262
lnc-RP11-432B6.3.1-3	1640	0	30	0.001	17.0721	14.0594	Up	1.85e-08	2.44e-07
lnc-C19orf12-2	492	0	9	0.001	17.0721	14.0594	Up	0.00512132	0.0162772
lnc-KCNJ2-1	328	0	6	0.001	17.0721	14.0594	Up	0.0306814	0.0710366
lnc-SLC30A1-1	711	0	13	0.001	17.0641	14.0587	Up	0.000470676	0.00213051
lnc-ZNF536-7	766	0	14	0.001	17.0572	14.0581	Up	0.000259154	0.00127621
lnc-RALGPS1-2	2627	0	48	0.001	17.0526	14.0577	Up	4e-13	1.22e-11
lnc-MRPS17-1	1698	0	31	0.001	17.0386	14.0565	Up	1.02e-08	1.41e-07
OR13D1	1041	0	19	0.001	17.0338	14.0561	Up	1.31e-05	8.94e-05
lnc-MRPL15-2	274	0	5	0.001	17.0305	14.0558	Up	0.0557238	0.118405
lnc-ELAC2-5	274	0	5	0.001	17.0305	14.0558	Up	0.0557238	0.116474
lnc-MYEOV-8	274	0	5	0.001	17.0305	14.0558	Up	0.0557238	0.115542
lnc-HAS2-4	329	0	6	0.001	17.0202	14.055	Up	0.0306814	0.0717954
GCHFR	713	0	13	0.001	17.0162	14.0546	Up	0.000470676	0.00213908
lnc-WNT5A-1	384	0	7	0.001	17.0128	14.0543	Up	0.0168932	0.0445445
lnc-C12orf35-4	768	0	14	0.001	17.0128	14.0543	Up	0.000259154	0.00125582
DEFB110	384	0	7	0.001	17.0128	14.0543	Up	0.0168932	0.0436624
lnc-STK39-1	1152	0	21	0.001	17.0128	14.0543	Up	3.98e-06	3.13e-05
lnc-EFHA2-4	439	0	8	0.001	17.0073	14.0539	Up	0.00930136	0.0274993
lnc-C12orf35-5	494	0	9	0.001	17.003	14.0535	Up	0.00512132	0.0162782
lnc-TTLL1-3	1043	0	19	0.001	17.0012	14.0533	Up	1.31e-05	9.1e-05
lnc-KATNA1-2	660	0	12	0.001	16.9686	14.0506	Up	0.000854844	0.00360955
lnc-SP140L-1	537	0	10	0.001	16.9686	14.0506	Up	0.0028198	0.0100066
lnc-SEMA6A-6	825	0	15	0.001	16.9686	14.0506	Up	0.00014269	0.000744953
lnc-NANOGP1-1	605	0	11	0.001	16.9686	14.0506	Up	0.00155257	0.00590398
lnc-LDHAL6A-2	330	0	6	0.001	16.9686	14.0506	Up	0.0306814	0.0711095
lnc-SSBP1-2	826	0	15	0.001	16.9481	14.0488	Up	0.00014269	0.000739595
lnc-CD46-2	1708	0	31	0.001	16.9388	14.048	Up	1.02e-08	1.42e-07
lnc-DSCR4-6	1598	0	29	0.001	16.9368	14.0479	Up	3.36e-08	4.18e-07
lnc-RP11-680F20.5.1-1	496	0	9	0.001	16.9344	14.0477	Up	0.00512132	0.0165641
lnc-PAQR9-1	441	0	8	0.001	16.9301	14.0473	Up	0.00930136	0.0274389
lnc-CTR9-1	441	0	8	0.001	16.9301	14.0473	Up	0.00930136	0.0271013
lnc-CTD-2210P24.4.1-9	441	0	8	0.001	16.9301	14.0473	Up	0.00930136	0.027019
lnc-SPANXN4-2	331	0	6	0.001	16.9173	14.0462	Up	0.0306814	0.0727783
lnc-EMR1-1	662	0	12	0.001	16.9173	14.0462	Up	0.000854844	0.00355789
lnc-ALX1-1	883	0	16	0.001	16.911	14.0457	Up	7.86e-05	0.000435986
lnc-SORCS3-10	276	0	5	0.001	16.9071	14.0453	Up	0.0557238	0.115604
lnc-PDZD9-3	2651	0	48	0.001	16.8982	14.0446	Up	4e-13	1.22e-11
lnc-HARS-1	884	0	16	0.001	16.8918	14.044	Up	7.86e-05	0.000440459
lnc-REST-5	774	0	14	0.001	16.8809	14.0431	Up	0.000259154	0.00126049
lnc-EPHA6-6	387	0	7	0.001	16.8809	14.0431	Up	0.0168932	0.0433873
lnc-CYP27C1-1	332	0	6	0.001	16.8664	14.0419	Up	0.0306814	0.071836
lnc-IFITM10-2	720	0	13	0.001	16.8508	14.0405	Up	0.000470676	0.00210408
[truncated: 47,730 more rows]
