# Supplementary material for: Serum exosomal long noncoding RNAs lnc-FAM72D-3 and lnc-EPC1-4 as diagnostic biomarkers for hepatocellular carcinoma
Source: Aging (Albany NY). 2020 Jun 18;12(12):11843–63. doi: 10.18632/aging.103355 (PMC7343450; doi:10.18632/aging.103355)
Supplement: Supplementary Table 3 [file aging-12-103355-s003..xls]

## Sheet: aging-12-103355-s004
Supplemental table 3. The differentially expressed lncRNA in Normal group vs. Cirrrhosis group.
geneID	geneLength	N-Expression	C-Expression	N-RPKM	C-RPKM	log2 Ratio(C/N)	Up-Down-Regulation(C/N)	P-value	FDR
lnc-RP11-1277H1.1.1-2	2270	0	1249	0.001	3493.95	21.7364	Up	0	0
lnc-ANKRD20A1-7	470	0	165	0.001	2229.29	21.0882	Up	5.83e-136	5.65e-133
lnc-RGL4-3	1012	0	355	0.001	2227.55	21.087	Up	4.32e-291	9.84e-288
lnc-GUSB-13	446	0	113	0.001	1608.88	20.6176	Up	1.67e-93	1.18e-90
lnc-ZBTB45-2	785	0	190	0.001	1536.97	20.5517	Up	2.26e-156	2.43e-153
lnc-CCNYL2-5	500	0	91	0.001	1155.72	20.1404	Up	1.53e-75	8.98e-73
lnc-SLC9A3-1	375	0	57	0.001	965.214	19.8805	Up	8.82e-48	3.63e-45
lnc-ZEB2-19	1546	0	229	0.001	940.602	19.8432	Up	3.25e-188	4.19e-185
lnc-BTRC-6	382	0	47	0.001	781.294	19.5755	Up	1.29e-39	4.58e-37
lnc-MCPH1-2	701	0	59	0.001	534.459	19.0277	Up	2.05e-49	8.73e-47
lnc-RBPJ-3	936	0	76	0.001	515.606	18.9759	Up	2.71e-63	1.43e-60
lnc-CRTC1-1	857	0	64	0.001	474.219	18.8552	Up	1.7e-53	7.64e-51
lnc-CYP2B6-2	549	0	40	0.001	462.666	18.8196	Up	6.69e-34	2.02e-31
lnc-MYO6-13	674	0	47	0.001	442.811	18.7563	Up	1.29e-39	4.53e-37
lnc-AHI1-5	628	0	35	0.001	353.906	18.433	Up	8.09e-30	2.14e-27
lnc-TTC7B-6	769	0	39	0.001	322.046	18.2969	Up	4.39e-33	1.3e-30
lnc-EFNA2-1	1256	0	56	0.001	283.125	18.1111	Up	5.78e-47	2.33e-44
lnc-SMN1-3	322	0	14	0.001	276.091	18.0748	Up	1.13e-12	8.71e-11
lnc-PRLH-1	350	0	15	0.001	272.147	18.054	Up	1.73e-13	1.5e-11
lnc-CD36-1	236	0	10	0.001	269.072	18.0376	Up	2.09e-09	7.9e-08
lnc-PDCL3-5	414	0	17	0.001	260.753	17.9923	Up	4.02e-15	4.31e-13
lnc-PLXDC2-6	300	0	12	0.001	254.004	17.9545	Up	4.86e-11	2.67e-09
lnc-HES7-1	567	0	21	0.001	235.189	17.8435	Up	2.18e-18	3.14e-16
lnc-WDR85-1	1111	0	41	0.001	234.342	17.8383	Up	1.02e-34	3.14e-32
lnc-EMB-7	408	0	15	0.001	233.459	17.8328	Up	1.73e-13	1.5e-11
lnc-AKT1-1	1225	0	110	0.001	231.371	17.8199	Up	4.7e-91	3.25e-88
lnc-NRIP1-13	335	0	12	0.001	227.466	17.7953	Up	4.86e-11	2.71e-09
lnc-ZDHHC13-6	312	0	11	0.001	223.881	17.7724	Up	3.19e-10	1.52e-08
lnc-KIAA0947-4	1050	0	36	0.001	217.717	17.7321	Up	1.23e-30	3.34e-28
lnc-CNTRL-3	509	0	17	0.001	212.086	17.6943	Up	4.02e-15	4.35e-13
lnc-IQCF2-2	247	0	8	0.001	205.671	17.65	Up	8.97e-08	2.18e-06
lnc-ZIC3-2	278	0	9	0.001	205.579	17.6493	Up	1.37e-08	4.31e-07
REREP3	804	0	26	0.001	205.351	17.6477	Up	1.8e-22	3.51e-20
lnc-TIMM22-1	877	0	27	0.001	195.499	17.5768	Up	2.75e-23	5.49e-21
lnc-CIB3-5	228	0	7	0.001	194.959	17.5728	Up	5.88e-07	1.11e-05
lnc-TMEM139-2	297	0	9	0.001	192.427	17.554	Up	1.37e-08	4.22e-07
lnc-IDS-15	298	0	9	0.001	191.781	17.5491	Up	1.37e-08	4.37e-07
lnc-GLP1R-4	298	0	9	0.001	191.781	17.5491	Up	1.37e-08	4.17e-07
lnc-MTMR4-2	813	0	24	0.001	187.457	17.5162	Up	7.75e-21	1.33e-18
lnc-GRB14-3	246	0	7	0.001	180.694	17.4632	Up	5.88e-07	1.17e-05
FAM9A	1543	0	43	0.001	176.963	17.4331	Up	2.38e-36	7.86e-34
ACSM2B	2441	0	68	0.001	176.897	17.4326	Up	9.21e-57	4.4e-54
lnc-ZNF534-3	360	0	10	0.001	176.391	17.4284	Up	2.09e-09	7.78e-08
lnc-MDFIC-5	408	0	11	0.001	171.203	17.3854	Up	3.19e-10	1.45e-08
lnc-LRPPRC-2	261	0	7	0.001	170.309	17.3778	Up	5.88e-07	1.14e-05
lnc-HELZ-1	348	0	9	0.001	167.108	17.3504	Up	1.37e-08	4.41e-07
lnc-CCDC64-3	238	0	6	0.001	160.086	17.2885	Up	3.85e-06	5.34e-05
lnc-STIL-1	1046	0	7	0.001	158.187	17.2713	Up	5.88e-07	1.14e-05
lnc-AC233263.1-11	442	0	11	0.001	158.034	17.2699	Up	3.19e-10	1.46e-08
lnc-VAV3-6	403	0	10	0.001	157.571	17.2656	Up	2.09e-09	8.26e-08
lnc-NAV2-2	648	0	7	0.001	157.069	17.261	Up	5.88e-07	1.17e-05
lnc-SNX8-2	285	0	7	0.001	155.967	17.2509	Up	5.88e-07	1.16e-05
lnc-TOP3B-4	574	0	14	0.001	154.88	17.2408	Up	1.13e-12	8.89e-11
lnc-CD36-2	289	0	7	0.001	153.808	17.2308	Up	5.88e-07	1.09e-05
lnc-SLC25A32-6	291	0	7	0.001	152.751	17.2208	Up	5.88e-07	1.11e-05
lnc-PDHA2-5	250	0	6	0.001	152.402	17.2175	Up	3.85e-06	5.57e-05
lnc-ZNRF3-1	668	0	16	0.001	152.098	17.2146	Up	2.64e-14	2.54e-12
lnc-C5orf30-7	464	0	11	0.001	150.541	17.1998	Up	3.19e-10	1.45e-08
lnc-DMRTA2-9	214	0	5	0.001	148.367	17.1788	Up	2.52e-05	0.000261894
lnc-IGF1R-1	568	0	13	0.001	145.337	17.149	Up	7.42e-12	4.95e-10
lnc-TRPM6-7	440	0	10	0.001	144.32	17.1389	Up	2.09e-09	8.21e-08
lnc-DIAPH3-7	443	0	10	0.001	143.343	17.1291	Up	2.09e-09	7.92e-08
lnc-COL19A1-3	266	0	6	0.001	143.235	17.128	Up	3.85e-06	5.66e-05
lnc-CTD-2144E22.5.1-10	364	0	8	0.001	139.562	17.0906	Up	8.97e-08	2.3e-06
lnc-OVOL1-1	464	0	10	0.001	136.855	17.0623	Up	2.09e-09	7.73e-08
lnc-SLC39A11-5	465	0	10	0.001	136.561	17.0592	Up	2.09e-09	7.88e-08
lnc-SYVN1-2	282	0	6	0.001	135.108	17.0438	Up	3.85e-06	5.37e-05
lnc-MAP1LC3B2-8	238	0	5	0.001	133.405	17.0255	Up	2.52e-05	0.000270223
lnc-CTIF-4	668	0	14	0.001	133.086	17.022	Up	1.13e-12	8.83e-11
lnc-TRIM38-5	529	0	11	0.001	132.044	17.0107	Up	3.19e-10	1.55e-08
lnc-SDC2-3	533	0	11	0.001	131.053	16.9998	Up	3.19e-10	1.52e-08
lnc-CDH12-6	295	0	6	0.001	129.154	16.9787	Up	3.85e-06	5.9e-05
lnc-PGR-6	296	0	6	0.001	128.718	16.9739	Up	3.85e-06	5.49e-05
lnc-LACE1-2	395	0	8	0.001	128.609	16.9726	Up	8.97e-08	2.18e-06
lnc-PCDH8-8	395	0	8	0.001	128.609	16.9726	Up	8.97e-08	2.17e-06
lnc-TMEM139-3	297	0	6	0.001	128.285	16.969	Up	3.85e-06	5.46e-05
lnc-CXCR6-1	349	0	7	0.001	127.366	16.9586	Up	5.88e-07	1.11e-05
lnc-PLA2G4A-1	1097	0	22	0.001	127.349	16.9584	Up	3.33e-19	4.93e-17
lnc-VPREB1-8	250	0	5	0.001	127.002	16.9545	Up	2.52e-05	0.00026466
lnc-EDNRB-7	351	0	7	0.001	126.64	16.9504	Up	5.88e-07	1.16e-05
lnc-SEC61G-9	756	0	15	0.001	125.994	16.943	Up	1.73e-13	1.49e-11
lnc-KRAS-3	658	0	13	0.001	125.458	16.9368	Up	7.42e-12	4.99e-10
lnc-SCN1A-1	317	0	5	0.001	125.002	16.9316	Up	2.52e-05	0.000270372
lnc-TIGD1L2-7	408	0	8	0.001	124.512	16.9259	Up	8.97e-08	2.25e-06
lnc-SLC6A18-1	2616	0	51	0.001	123.798	16.9176	Up	6.99e-43	2.6e-40
lnc-GALNT5-3	257	0	5	0.001	123.543	16.9146	Up	2.52e-05	0.000291071
lnc-ASAH2-4	360	0	7	0.001	123.474	16.9138	Up	5.88e-07	1.08e-05
lnc-PRMT8-1	515	0	10	0.001	123.303	16.9118	Up	2.09e-09	8.03e-08
lnc-TFG-1	309	0	6	0.001	123.303	16.9118	Up	3.85e-06	5.43e-05
lnc-PARVA-5	259	0	5	0.001	122.589	16.9035	Up	2.52e-05	0.000282243
lnc-PPP2R5E-3	209	0	4	0.001	121.533	16.891	Up	0.000165443	0.00127741
lnc-MANEA-9	315	0	6	0.001	120.954	16.8841	Up	3.85e-06	5.41e-05
lnc-TOMM20L-3	316	0	6	0.001	120.571	16.8795	Up	3.85e-06	5.67e-05
lnc-AC096644.1-8	316	0	6	0.001	120.571	16.8795	Up	3.85e-06	5.5e-05
lnc-C15orf57-2	584	0	11	0.001	119.608	16.868	Up	3.19e-10	1.53e-08
lnc-TTC29-1	478	0	9	0.001	119.562	16.8674	Up	1.37e-08	4.11e-07
lnc-AKR1E2-11	2287	0	43	0.001	119.394	16.8654	Up	2.38e-36	7.73e-34
LOC102724691	642	0	12	0.001	118.693	16.8569	Up	4.86e-11	2.7e-09
lnc-NMNAT3-8	378	0	7	0.001	117.594	16.8435	Up	5.88e-07	1.18e-05
lnc-LRRC66-2	486	0	9	0.001	117.594	16.8435	Up	1.37e-08	4.16e-07
lnc-BRD2-2	270	0	5	0.001	117.594	16.8435	Up	2.52e-05	0.000260289
lnc-C3orf30-13	325	0	6	0.001	117.232	16.839	Up	3.85e-06	5.37e-05
lnc-KL-1	601	0	11	0.001	116.225	16.8266	Up	3.19e-10	1.51e-08
lnc-SEC14L3-2	331	0	6	0.001	115.107	16.8126	Up	3.85e-06	5.54e-05
LINC00317	612	0	11	0.001	114.136	16.8004	Up	3.19e-10	1.49e-08
lnc-SLFN5-2	334	0	6	0.001	114.074	16.7996	Up	3.85e-06	5.85e-05
lnc-VAV3-1	1119	0	20	0.001	113.496	16.7923	Up	1.43e-17	1.91e-15
lnc-WDPCP-6	563	0	10	0.001	112.79	16.7833	Up	2.09e-09	8.35e-08
lnc-ZNF704-2	283	0	5	0.001	112.192	16.7756	Up	2.52e-05	0.000260984
lnc-FBXO9-4	340	0	6	0.001	112.06	16.7739	Up	3.85e-06	5.82e-05
lnc-ATP6V1D-4	398	0	7	0.001	111.685	16.7691	Up	5.88e-07	1.1e-05
lnc-VAT1L-1	455	0	8	0.001	111.65	16.7686	Up	8.97e-08	2.33e-06
lnc-HMGB2-6	285	0	5	0.001	111.405	16.7655	Up	2.52e-05	0.000268515
lnc-ZNF704-4	457	0	8	0.001	111.161	16.7623	Up	8.97e-08	2.15e-06
lnc-HELT-4	343	0	6	0.001	111.08	16.7612	Up	3.85e-06	5.62e-05
lnc-NUDT4-3	287	0	5	0.001	110.629	16.7554	Up	2.52e-05	0.000277908
lnc-AC108463.1-5	347	0	6	0.001	109.8	16.7445	Up	3.85e-06	5.49e-05
lnc-IFIT5-1	1315	0	7	0.001	109.755	16.7439	Up	5.88e-07	1.19e-05
lnc-MED10-17	290	0	5	0.001	109.484	16.7404	Up	2.52e-05	0.000276336
lnc-RNASE11-1	348	0	6	0.001	109.484	16.7404	Up	3.85e-06	5.6e-05
lnc-CBR1-2	348	0	6	0.001	109.484	16.7404	Up	3.85e-06	5.4e-05
lnc-ZNF345-2	585	0	10	0.001	108.549	16.728	Up	2.09e-09	7.71e-08
lnc-HDGFL1-6	528	0	9	0.001	108.24	16.7239	Up	1.37e-08	4.29e-07
lnc-DCAF8L1-4	352	0	6	0.001	108.24	16.7239	Up	3.85e-06	5.63e-05
lnc-CDC5L-3	588	0	10	0.001	107.995	16.7206	Up	2.09e-09	8.2e-08
lnc-BHMT2-6	412	0	7	0.001	107.89	16.7192	Up	5.88e-07	1.12e-05
lnc-CGGBP1-4	295	0	5	0.001	107.629	16.7157	Up	2.52e-05	0.000264231
lnc-GNAQ-1	451	0	7	0.001	107.369	16.7122	Up	5.88e-07	1.12e-05
lnc-SSR1-2	296	0	5	0.001	107.265	16.7108	Up	2.52e-05	0.00027712
lnc-ZBTB26-2	297	0	5	0.001	106.904	16.706	Up	2.52e-05	0.000257817
lnc-COL4A1-4	299	0	5	0.001	106.189	16.6963	Up	2.52e-05	0.000259598
lnc-RBM17-2	480	0	8	0.001	105.835	16.6915	Up	8.97e-08	2.16e-06
lnc-SRPK2-14	544	0	9	0.001	105.057	16.6808	Up	1.37e-08	4.12e-07
lnc-TAAR8-1	242	0	4	0.001	104.96	16.6795	Up	0.000165443	0.00135098
lnc-GNA13-1	303	0	5	0.001	104.787	16.6771	Up	2.52e-05	0.000283965
lnc-RDH8-3	916	0	15	0.001	103.986	16.666	Up	1.73e-13	1.52e-11
lnc-RNMT-3	611	0	10	0.001	103.93	16.6652	Up	2.09e-09	7.8e-08
lnc-IL12RB1-2	367	0	6	0.001	103.816	16.6637	Up	3.85e-06	5.44e-05
lnc-CBLB-11	557	0	9	0.001	102.605	16.6467	Up	1.37e-08	4.37e-07
lnc-C2orf27A-7	372	0	6	0.001	102.421	16.6442	Up	3.85e-06	5.82e-05
lnc-SFRP2-1	558	0	9	0.001	102.421	16.6442	Up	1.37e-08	4.27e-07
lnc-IQCG-13	497	0	8	0.001	102.215	16.6412	Up	8.97e-08	2.25e-06
lnc-BASP1-20	1122	0	18	0.001	101.873	16.6364	Up	6.14e-16	7.29e-14
lnc-POU3F2-5	313	0	5	0.001	101.439	16.6303	Up	2.52e-05	0.000290552
S100A4	564	0	9	0.001	101.331	16.6287	Up	1.37e-08	4.34e-07
lnc-CREB1-3	564	0	9	0.001	101.331	16.6287	Up	1.37e-08	4.28e-07
lnc-PLAC9-1	377	0	6	0.001	101.062	16.6249	Up	3.85e-06	5.79e-05
lnc-NKD2-3	1181	0	43	0.001	100.351	16.6147	Up	2.38e-36	7.8e-34
lnc-CASC4-1	254	0	4	0.001	100.001	16.6097	Up	0.000165443	0.0012851
lnc-TREX2-1	255	0	4	0.001	99.6093	16.604	Up	0.000165443	0.00123838
lnc-PLEKHA3-17	705	0	11	0.001	99.0795	16.5963	Up	3.19e-10	1.51e-08
lnc-RAB2A-5	322	0	5	0.001	98.6039	16.5894	Up	2.52e-05	0.000273322
lnc-SLC25A48-6	774	0	12	0.001	98.4511	16.5871	Up	4.86e-11	2.69e-09
lnc-SYNJ1-1	390	0	6	0.001	97.6937	16.576	Up	3.85e-06	5.62e-05
lnc-FOXN2-3	325	0	5	0.001	97.6937	16.576	Up	2.52e-05	0.000275092
lnc-ARID1B-5	261	0	4	0.001	97.3194	16.5704	Up	0.000165443	0.00134108
lnc-SACS-1	457	0	7	0.001	97.2662	16.5697	Up	5.88e-07	1.15e-05
lnc-GTF2B-10	328	0	5	0.001	96.8002	16.5627	Up	2.52e-05	0.000272788
lnc-RNF144B-2	197	0	3	0.001	96.7019	16.5613	Up	0.00108424	0.00568499
lnc-MRGPRX4-2	658	0	10	0.001	96.506	16.5583	Up	2.09e-09	8.16e-08
lnc-FAM212A-1	330	0	5	0.001	96.2135	16.554	Up	2.52e-05	0.000280219
lnc-KBTBD2-1	264	0	4	0.001	96.2135	16.554	Up	0.000165443	0.00131088
lnc-C12orf50-5	265	0	4	0.001	95.8505	16.5485	Up	0.000165443	0.00132061
lnc-SHCBP1-4	1325	0	20	0.001	95.8505	16.5485	Up	1.43e-17	1.9e-15
lnc-CRKL-1	266	0	4	0.001	95.4901	16.5431	Up	0.000165443	0.00123076
lnc-SKIL-5	600	0	9	0.001	95.2514	16.5395	Up	1.37e-08	4.17e-07
lnc-ETNK1-5	401	0	6	0.001	95.0139	16.5359	Up	3.85e-06	5.37e-05
lnc-SLC1A1-8	468	0	7	0.001	94.98	16.5353	Up	5.88e-07	1.16e-05
lnc-AP3S1-7	404	0	6	0.001	94.3083	16.5251	Up	3.85e-06	5.67e-05
lnc-SOD2-7	741	0	11	0.001	94.2659	16.5244	Up	3.19e-10	1.49e-08
lnc-LPHN3-9	477	0	7	0.001	93.188	16.5079	Up	5.88e-07	1.1e-05
lnc-ATP6V1D-5	614	0	9	0.001	93.0795	16.5062	Up	1.37e-08	4.39e-07
lnc-RP11-1220K2.2.1-6	342	0	5	0.001	92.8376	16.5024	Up	2.52e-05	0.000272407
lnc-DDX27-6	343	0	5	0.001	92.567	16.4982	Up	2.52e-05	0.000257477
lnc-ASTN1-2	1099	0	16	0.001	92.449	16.4964	Up	2.64e-14	2.55e-12
lnc-KLHL32-6	481	0	7	0.001	92.413	16.4958	Up	5.88e-07	1.19e-05
lnc-EIF3A-5	622	0	9	0.001	91.8824	16.4875	Up	1.37e-08	4.13e-07
lnc-C18orf21-2	416	0	6	0.001	91.5879	16.4829	Up	3.85e-06	5.51e-05
lnc-DNAAF1-6	208	0	3	0.001	91.5879	16.4829	Up	0.00108424	0.005849
lnc-RP11-408E5.4.1-9	416	0	6	0.001	91.5879	16.4829	Up	3.85e-06	5.44e-05
lnc-AL445665.1-4	416	0	6	0.001	91.5879	16.4829	Up	3.85e-06	5.4e-05
lnc-ZNF266-3	347	0	5	0.001	91.4999	16.4815	Up	2.52e-05	0.000260012
lnc-THEMIS-3	419	0	6	0.001	90.9321	16.4725	Up	3.85e-06	5.76e-05
lnc-CCDC43-4	838	0	12	0.001	90.9321	16.4725	Up	4.86e-11	2.61e-09
lnc-CSMD1-14	559	0	8	0.001	90.8779	16.4716	Up	8.97e-08	2.29e-06
lnc-HNRNPA2B1-12	769	0	11	0.001	90.8336	16.4709	Up	3.19e-10	1.45e-08
lnc-NDFIP2-24	280	0	4	0.001	90.7156	16.4691	Up	0.000165443	0.00128924
lnc-CNTNAP2-6	420	0	6	0.001	90.7156	16.4691	Up	3.85e-06	5.58e-05
lnc-SEC11A-3	630	0	9	0.001	90.7156	16.4691	Up	1.37e-08	4.13e-07
lnc-FNDC3B-10	280	0	4	0.001	90.7156	16.4691	Up	0.000165443	0.00120573
lnc-OMA1-1	421	0	6	0.001	90.5001	16.4656	Up	3.85e-06	5.41e-05
lnc-KDSR-2	281	0	4	0.001	90.3928	16.4639	Up	0.000165443	0.00129733
lnc-C12orf48-10	422	0	6	0.001	90.2857	16.4622	Up	3.85e-06	5.82e-05
lnc-GPR26-5	422	0	6	0.001	90.2857	16.4622	Up	3.85e-06	5.77e-05
lnc-RNF144A-5	634	0	9	0.001	90.1433	16.4599	Up	1.37e-08	4.14e-07
lnc-MUC20-9	564	0	8	0.001	90.0722	16.4588	Up	8.97e-08	2.21e-06
lnc-EDIL3-3	424	0	6	0.001	89.8598	16.4554	Up	3.85e-06	5.9e-05
lnc-RECQL5-2	566	0	8	0.001	89.754	16.4537	Up	8.97e-08	2.34e-06
IFNA6	570	0	8	0.001	89.1241	16.4435	Up	8.97e-08	2.18e-06
lnc-C6orf192-2	642	0	9	0.001	89.02	16.4418	Up	1.37e-08	4.11e-07
lnc-IFNA8-1	571	0	8	0.001	88.968	16.441	Up	8.97e-08	2.2e-06
lnc-SH2B2-6	1145	0	16	0.001	88.7349	16.4372	Up	2.64e-14	2.54e-12
lnc-AC110373.1-3	573	0	8	0.001	88.6575	16.436	Up	8.97e-08	2.33e-06
lnc-DCDC2C-2	717	0	10	0.001	88.5648	16.4344	Up	2.09e-09	7.97e-08
lnc-STRN3-1	431	0	6	0.001	88.4004	16.4318	Up	3.85e-06	5.53e-05
lnc-ALDH1A1-7	361	0	5	0.001	87.9514	16.4244	Up	2.52e-05	0.000262245
lnc-MAOA-5	1590	0	22	0.001	87.8629	16.423	Up	3.33e-19	4.92e-17
lnc-AC106017.1.1-2	217	0	3	0.001	87.7893	16.4218	Up	0.00108424	0.00616884
lnc-MED20-5	579	0	8	0.001	87.7388	16.4209	Up	8.97e-08	2.27e-06
lnc-C5orf30-6	363	0	5	0.001	87.4669	16.4164	Up	2.52e-05	0.000270822
lnc-UGT2B4-2	581	0	8	0.001	87.4367	16.416	Up	8.97e-08	2.32e-06
lnc-DUOX1-1	292	0	4	0.001	86.9876	16.4085	Up	0.000165443	0.00132718
lnc-C10orf137-1	950	0	13	0.001	86.896	16.407	Up	7.42e-12	5.01e-10
lnc-NR0B1-2	366	0	5	0.001	86.7499	16.4046	Up	2.52e-05	0.000264017
lnc-ETV3L-1	293	0	4	0.001	86.6907	16.4036	Up	0.000165443	0.00122722
lnc-INSL6-2	220	0	3	0.001	86.5922	16.4019	Up	0.00108424	0.00569347
lnc-NSMCE1-8	294	0	4	0.001	86.3958	16.3987	Up	0.000165443	0.00133493
lnc-SNRK-3	294	0	4	0.001	86.3958	16.3987	Up	0.000165443	0.00128227
OCLM	884	0	12	0.001	86.2004	16.3954	Up	4.86e-11	2.8e-09
lnc-ZCCHC9-3	369	0	5	0.001	86.0446	16.3928	Up	2.52e-05	0.000283883
lnc-KLF6-4	430	0	5	0.001	85.3507	16.3811	Up	2.52e-05	0.000291766
lnc-TRIO-4	670	0	9	0.001	85.2998	16.3803	Up	1.37e-08	4.38e-07
lnc-TBC1D7-6	894	0	12	0.001	85.2362	16.3792	Up	4.86e-11	2.68e-09
lnc-CLMP-7	373	0	5	0.001	85.1219	16.3772	Up	2.52e-05	0.0002803
lnc-FAM188B2-1	449	0	6	0.001	84.8565	16.3727	Up	3.85e-06	5.45e-05
lnc-C10orf122-2	300	0	4	0.001	84.6679	16.3695	Up	0.000165443	0.00121144
lnc-SPATA8-3	376	0	5	0.001	84.4427	16.3657	Up	2.52e-05	0.000266901
lnc-ZNF683-5	301	0	4	0.001	84.3866	16.3647	Up	0.000165443	0.00123886
lnc-HSCB-5	377	0	5	0.001	84.2187	16.3619	Up	2.52e-05	0.00028739
CA3-AS1	830	0	11	0.001	84.1579	16.3608	Up	3.19e-10	1.48e-08
lnc-MGMT-7	453	0	6	0.001	84.1072	16.3599	Up	3.85e-06	5.58e-05
lnc-MARCKS-13	529	0	7	0.001	84.0277	16.3586	Up	5.88e-07	1.19e-05
lnc-USP31-3	381	0	5	0.001	83.3346	16.3466	Up	2.52e-05	0.000290725
lnc-MAP3K8-11	382	0	5	0.001	83.1164	16.3428	Up	2.52e-05	0.000257409
lnc-HLA-DRA-4	386	0	5	0.001	82.2551	16.3278	Up	2.52e-05	0.000256531
lnc-JAK1-4	618	0	8	0.001	82.2019	16.3269	Up	8.97e-08	2.17e-06
lnc-RSPH10B2-1	1012	0	13	0.001	81.5723	16.3158	Up	7.42e-12	4.99e-10
lnc-L3MBTL3-1	703	0	9	0.001	81.2956	16.3109	Up	1.37e-08	4.19e-07
lnc-XXbac-B461K10.4.1-7	313	0	4	0.001	81.1514	16.3083	Up	0.000165443	0.00127258
lnc-LEPROTL1-2	550	0	7	0.001	80.8194	16.3024	Up	5.88e-07	1.1e-05
lnc-REV1-1	236	0	3	0.001	80.7215	16.3007	Up	0.00108424	0.00599095
lnc-RTN4R-3	631	0	8	0.001	80.5083	16.2969	Up	8.97e-08	2.25e-06
lnc-TRIM29-6	553	0	7	0.001	80.3809	16.2946	Up	5.88e-07	1.1e-05
lnc-TRAT1-9	949	0	12	0.001	80.2962	16.293	Up	4.86e-11	2.62e-09
lnc-LMX1A-3	397	0	5	0.001	79.976	16.2873	Up	2.52e-05	0.000258225
lnc-LRRC52-7	715	0	9	0.001	79.9312	16.2865	Up	1.37e-08	4.33e-07
lnc-EIF4E-2	318	0	4	0.001	79.8754	16.2855	Up	0.000165443	0.00133968
lnc-FGFR1OP-14	1035	0	13	0.001	79.7596	16.2834	Up	7.42e-12	4.84e-10
lnc-GPR111-1	319	0	4	0.001	79.625	16.2809	Up	0.000165443	0.00120892
lnc-FAM125B-1	719	0	9	0.001	79.4866	16.2784	Up	1.37e-08	4.09e-07
lnc-CENPM-2	480	0	6	0.001	79.3762	16.2764	Up	3.85e-06	5.86e-05
lnc-SAMD5-3	480	0	6	0.001	79.3762	16.2764	Up	3.85e-06	5.58e-05
lnc-USP14-6	240	0	3	0.001	79.3762	16.2764	Up	0.00108424	0.00582303
lnc-MYO1C-1	482	0	6	0.001	79.0468	16.2704	Up	3.85e-06	5.62e-05
lnc-NBEA-9	643	0	8	0.001	79.0058	16.2697	Up	8.97e-08	2.33e-06
lnc-C21orf119-2	242	0	3	0.001	78.7202	16.2644	Up	0.00108424	0.0056773
lnc-ALDH1A2-2	323	0	4	0.001	78.6389	16.263	Up	0.000165443	0.00133243
lnc-SFMBT1-2	809	0	10	0.001	78.4931	16.2603	Up	2.09e-09	8.28e-08
lnc-FBXO21-1	324	0	4	0.001	78.3962	16.2585	Up	0.000165443	0.00135556
lnc-SORBS1-1	405	0	5	0.001	78.3962	16.2585	Up	2.52e-05	0.000280461
lnc-FAM173B-3	243	0	3	0.001	78.3962	16.2585	Up	0.00108424	0.00572766
lnc-L1TD1-1	405	0	5	0.001	78.3962	16.2585	Up	2.52e-05	0.000257749
lnc-OR1A1-2	325	0	4	0.001	78.155	16.2541	Up	0.000165443	0.0013352
lnc-CTC-349C3.2.1-1	489	0	6	0.001	77.9153	16.2496	Up	3.85e-06	5.64e-05
lnc-DTWD2-11	409	0	5	0.001	77.6295	16.2443	Up	2.52e-05	0.000291418
lnc-ROBO2-3	576	0	7	0.001	77.1713	16.2358	Up	5.88e-07	1.16e-05
lnc-GINS3-2	330	0	4	0.001	76.9708	16.232	Up	0.000165443	0.00123982
lnc-DIRC3-2	745	0	9	0.001	76.7125	16.2272	Up	1.37e-08	4.1e-07
lnc-SORCS1-7	332	0	4	0.001	76.5071	16.2233	Up	0.000165443	0.00133828
lnc-SLC48A1-2	582	0	7	0.001	76.3757	16.2208	Up	5.88e-07	1.18e-05
lnc-C11orf92-7	499	0	6	0.001	76.3538	16.2204	Up	3.85e-06	5.76e-05
lnc-CNTLN-1	666	0	8	0.001	76.2774	16.219	Up	8.97e-08	2.3e-06
lnc-AC131097.4.1-6	999	0	12	0.001	76.2774	16.219	Up	4.86e-11	2.76e-09
lnc-ARPP21-1	333	0	4	0.001	76.2774	16.219	Up	0.000165443	0.00125537
lnc-DIAPH3-10	419	0	5	0.001	75.7768	16.2095	Up	2.52e-05	0.000279179
lnc-C1QB-1	419	0	5	0.001	75.7768	16.2095	Up	2.52e-05	0.000270073
lnc-KCNH5-7	252	0	3	0.001	75.5963	16.206	Up	0.00108424	0.00628525
lnc-MUM1-1	252	0	3	0.001	75.5963	16.206	Up	0.00108424	0.00609537
lnc-AL901608.1-67	420	0	5	0.001	75.5963	16.206	Up	2.52e-05	0.000275479
lnc-CTU1-1	337	0	4	0.001	75.372	16.2017	Up	0.000165443	0.00121696
lnc-RCAN2-2	506	0	6	0.001	75.2975	16.2003	Up	3.85e-06	5.59e-05
lnc-ATP6V0A4-2	422	0	5	0.001	75.2381	16.1992	Up	2.52e-05	0.000272864
lnc-AKR1E2-10	591	0	7	0.001	75.2126	16.1987	Up	5.88e-07	1.16e-05
lnc-NPY5R-5	338	0	4	0.001	75.149	16.1975	Up	0.000165443	0.00124754
lnc-C9orf93-5	338	0	4	0.001	75.149	16.1975	Up	0.000165443	0.00122652
lnc-TMEM242-2	423	0	5	0.001	75.0602	16.1958	Up	2.52e-05	0.000281592
KIAA1429	6439	0	76	0.001	74.9506	16.1937	Up	2.71e-63	1.42e-60
lnc-CYTH4-3	678	0	8	0.001	74.9274	16.1932	Up	8.97e-08	2.22e-06
FAM209A	678	0	8	0.001	74.9274	16.1932	Up	8.97e-08	2.19e-06
lnc-C21orf91-4	424	0	5	0.001	74.8832	16.1924	Up	2.52e-05	0.000272483
lnc-C10orf108-6	424	0	5	0.001	74.8832	16.1924	Up	2.52e-05	0.000263447
LCE3C	425	0	5	0.001	74.707	16.189	Up	2.52e-05	0.000289519
lnc-OR10G2-10	255	0	3	0.001	74.707	16.189	Up	0.00108424	0.0058785
lnc-KIAA0284-3	1022	0	12	0.001	74.5608	16.1861	Up	4.86e-11	2.78e-09
RPPH1	341	0	4	0.001	74.4879	16.1847	Up	0.000165443	0.00127284
lnc-RASGRP3-12	597	0	7	0.001	74.4567	16.1841	Up	5.88e-07	1.1e-05
lnc-UBE2E3-1	686	0	4	0.001	74.2701	16.1805	Up	0.000165443	0.00127639
lnc-GABRB2-3	600	0	7	0.001	74.0844	16.1769	Up	5.88e-07	1.18e-05
lnc-GRXCR2-1	258	0	3	0.001	73.8383	16.1721	Up	0.00108424	0.00583274
lnc-FAM156B-4	431	0	5	0.001	73.667	16.1687	Up	2.52e-05	0.000258021
lnc-CTNNA3-6	605	0	7	0.001	73.4722	16.1649	Up	5.88e-07	1.19e-05
lnc-RGS18-11	433	0	5	0.001	73.3267	16.1621	Up	2.52e-05	0.00025843
lnc-GABPA-19	607	0	7	0.001	73.2301	16.1601	Up	5.88e-07	1.15e-05
lnc-CADM2-4	695	0	8	0.001	73.0946	16.1575	Up	8.97e-08	2.3e-06
lnc-GJD2-3	695	0	8	0.001	73.0946	16.1575	Up	8.97e-08	2.23e-06
lnc-ZBTB25-1	435	0	5	0.001	72.9896	16.1554	Up	2.52e-05	0.00027894
lnc-GPCPD1-5	261	0	3	0.001	72.9896	16.1554	Up	0.00108424	0.00592832
lnc-DGKB-1	697	0	8	0.001	72.8849	16.1533	Up	8.97e-08	2.29e-06
lnc-ANKRA2-14	523	0	6	0.001	72.85	16.1526	Up	3.85e-06	5.52e-05
lnc-ELTD1-8	349	0	4	0.001	72.7804	16.1513	Up	0.000165443	0.00132252
lnc-ARHGDIB-5	611	0	7	0.001	72.7507	16.1507	Up	5.88e-07	1.16e-05
lnc-TSPAN19-2	1050	0	12	0.001	72.5725	16.1471	Up	4.86e-11	2.72e-09
lnc-SLFN11-1	263	0	3	0.001	72.4345	16.1444	Up	0.00108424	0.00588922
lnc-PCDH18-9	439	0	5	0.001	72.3245	16.1422	Up	2.52e-05	0.000266029
lnc-INPP1-1	528	0	6	0.001	72.1602	16.1389	Up	3.85e-06	5.51e-05
lnc-CCDC97-1	531	0	6	0.001	71.7525	16.1307	Up	3.85e-06	5.61e-05
lnc-NBPF10-1	267	0	3	0.001	71.3494	16.1226	Up	0.00108424	0.00619068
lnc-POLI-2	445	0	5	0.001	71.3494	16.1226	Up	2.52e-05	0.000265884
lnc-MRTO4-3	268	0	3	0.001	71.0831	16.1172	Up	0.00108424	0.00631837
lnc-FANCL-5	268	0	3	0.001	71.0831	16.1172	Up	0.00108424	0.00587932
lnc-NBPF6-2	2331	0	26	0.001	70.829	16.1121	Up	1.8e-22	3.49e-20
lnc-DYRK2-8	269	0	3	0.001	70.8189	16.1118	Up	0.00108424	0.00595102
lnc-FAM82A2-2	718	0	8	0.001	70.7531	16.1105	Up	8.97e-08	2.21e-06
lnc-PCDH10-7	719	0	8	0.001	70.6547	16.1085	Up	8.97e-08	2.29e-06
lnc-NKAP-1	810	0	9	0.001	70.5566	16.1065	Up	1.37e-08	4.26e-07
lnc-MIPEP-2	1171	0	13	0.001	70.4963	16.1053	Up	7.42e-12	4.85e-10
lnc-RNASEH2B-6	541	0	6	0.001	70.4262	16.1038	Up	3.85e-06	5.69e-05
lnc-NUDT11-5	451	0	5	0.001	70.4001	16.1033	Up	2.52e-05	0.000276806
lnc-ZNF730-8	544	0	6	0.001	70.0378	16.0958	Up	3.85e-06	5.42e-05
lnc-LOR-5	272	0	3	0.001	70.0378	16.0958	Up	0.00108424	0.00569039
lnc-ZMYND8-4	363	0	4	0.001	69.9735	16.0945	Up	0.000165443	0.00135355
lnc-TMEM22-3	363	0	4	0.001	69.9735	16.0945	Up	0.000165443	0.00121812
lnc-OBFC2B-1	545	0	6	0.001	69.9093	16.0932	Up	3.85e-06	5.63e-05
lnc-AHR-3	273	0	3	0.001	69.7812	16.0906	Up	0.00108424	0.00615888
lnc-NR2E1-5	455	0	5	0.001	69.7812	16.0906	Up	2.52e-05	0.000268736
lnc-SERP2-4	364	0	4	0.001	69.7812	16.0906	Up	0.000165443	0.00121166
lnc-SALL1-11	456	0	5	0.001	69.6282	16.0874	Up	2.52e-05	0.000256935
lnc-CCDC54-3	365	0	4	0.001	69.5901	16.0866	Up	0.000165443	0.00132526
lnc-ZNF41-1	1005	0	11	0.001	69.5035	16.0848	Up	3.19e-10	1.55e-08
lnc-CEMP1-2	459	0	5	0.001	69.1731	16.0779	Up	2.52e-05	0.000284793
lnc-IFT81-5	1104	0	12	0.001	69.0228	16.0748	Up	4.86e-11	2.7e-09
lnc-MAP1LC3B-5	460	0	5	0.001	69.0228	16.0748	Up	2.52e-05	0.000261194
lnc-PHF16-2	369	0	4	0.001	68.8357	16.0709	Up	0.000165443	0.00136859
ANP32AP1	738	0	8	0.001	68.8357	16.0709	Up	8.97e-08	2.31e-06
lnc-FZD4-10	646	0	7	0.001	68.8091	16.0703	Up	5.88e-07	1.13e-05
lnc-C2CD4A-4	925	0	10	0.001	68.6497	16.067	Up	2.09e-09	7.72e-08
APOE	1297	0	14	0.001	68.5438	16.0647	Up	1.13e-12	8.87e-11
lnc-GIT1-1	278	0	3	0.001	68.5262	16.0644	Up	0.00108424	0.00593587
lnc-ACSL4-1	464	0	5	0.001	68.4277	16.0623	Up	2.52e-05	0.000275635
lnc-FZD9-1	464	0	5	0.001	68.4277	16.0623	Up	2.52e-05	0.000262739
lnc-C2CD4A-6	743	0	8	0.001	68.3725	16.0611	Up	8.97e-08	2.32e-06
lnc-CBX3-2	466	0	5	0.001	68.134	16.0561	Up	2.52e-05	0.000270972
lnc-AC136428.1.1-4	560	0	6	0.001	68.0367	16.054	Up	3.85e-06	5.47e-05
lnc-OSBPL9-4	280	0	3	0.001	68.0367	16.054	Up	0.00108424	0.00570741
lnc-TSPYL5-1	468	0	5	0.001	67.8429	16.0499	Up	2.52e-05	0.000289261
DEFA6	468	0	5	0.001	67.8429	16.0499	Up	2.52e-05	0.000271047
lnc-CXADR-6	469	0	5	0.001	67.6982	16.0468	Up	2.52e-05	0.000289176
lnc-UBXN4-3	469	0	5	0.001	67.6982	16.0468	Up	2.52e-05	0.000258841
lnc-RP11-62N21.1.1-12	282	0	3	0.001	67.5542	16.0438	Up	0.00108424	0.00588427
lnc-FAM21A-2	1885	0	20	0.001	67.375	16.0399	Up	1.43e-17	1.91e-15
lnc-FGFR2-3	943	0	10	0.001	67.3393	16.0392	Up	2.09e-09	7.85e-08
lnc-ATP2B3-1	755	0	8	0.001	67.2858	16.038	Up	8.97e-08	2.22e-06
lnc-SPANXN2-3	378	0	4	0.001	67.1968	16.0361	Up	0.000165443	0.00129132
lnc-TMEM234-2	728	0	4	0.001	67.0195	16.0323	Up	0.000165443	0.00135126
C20orf144	570	0	6	0.001	66.8431	16.0285	Up	3.85e-06	5.73e-05
lnc-RPL7A-2	476	0	5	0.001	66.7027	16.0255	Up	2.52e-05	0.000287728
lnc-ERRFI1-2	477	0	5	0.001	66.5628	16.0224	Up	2.52e-05	0.000259322
lnc-SALL3-4	573	0	6	0.001	66.4931	16.0209	Up	3.85e-06	5.68e-05
SPINK2	764	0	8	0.001	66.4931	16.0209	Up	8.97e-08	2.19e-06
lnc-TGFB3-8	287	0	3	0.001	66.3773	16.0184	Up	0.00108424	0.00623575
lnc-EPB41L4A-1	287	0	3	0.001	66.3773	16.0184	Up	0.00108424	0.00567193
lnc-C19orf21-2	287	0	3	0.001	66.3773	16.0184	Up	0.00108424	0.00564902
lnc-AC008993.1-1	383	0	4	0.001	66.3195	16.0171	Up	0.000165443	0.00124318
lnc-NEIL2-1	384	0	4	0.001	66.1468	16.0134	Up	0.000165443	0.00131276
lnc-CEP152-2	864	0	9	0.001	66.1468	16.0134	Up	1.37e-08	4.18e-07
lnc-AC110373.1-11	673	0	7	0.001	66.0485	16.0112	Up	5.88e-07	1.09e-05
lnc-FCGR1B-4	385	0	4	0.001	65.975	16.0096	Up	0.000165443	0.00136947
lnc-LRP12-6	385	0	4	0.001	65.975	16.0096	Up	0.000165443	0.00136918
lnc-SOX1-5	385	0	4	0.001	65.975	16.0096	Up	0.000165443	0.00135814
lnc-C5orf43-3	1256	0	13	0.001	65.7255	16.0042	Up	7.42e-12	4.93e-10
lnc-ZNF32-3	677	0	7	0.001	65.6583	16.0027	Up	5.88e-07	1.11e-05
lnc-AC016251.1-16	484	0	5	0.001	65.6001	16.0014	Up	2.52e-05	0.000261823
lnc-TDO2-6	1646	0	17	0.001	65.5842	16.0011	Up	4.02e-15	4.36e-13
lnc-TESK1-1	679	0	7	0.001	65.4649	15.9984	Up	5.88e-07	1.16e-05
lnc-SERAC1-8	582	0	6	0.001	65.4649	15.9984	Up	3.85e-06	5.66e-05
lnc-AL901608.1-19	291	0	3	0.001	65.4649	15.9984	Up	0.00108424	0.00570276
lnc-KCNS3-10	1262	0	13	0.001	65.413	15.9973	Up	7.42e-12	5.04e-10
lnc-CHCHD7-3	486	0	5	0.001	65.3302	15.9955	Up	2.52e-05	0.000282897
lnc-TRIM49-1	486	0	5	0.001	65.3302	15.9955	Up	2.52e-05	0.000274088
lnc-SULT1A4-2	292	0	3	0.001	65.2407	15.9935	Up	0.00108424	0.00600896
lnc-RP11-738G5.2.1-8	584	0	6	0.001	65.2407	15.9935	Up	3.85e-06	5.54e-05
lnc-HIST1H1E-1	292	0	3	0.001	65.2407	15.9935	Up	0.00108424	0.00588097
lnc-BHLHE22-4	2336	0	24	0.001	65.2407	15.9935	Up	7.75e-21	1.32e-18
lnc-KCNA4-6	293	0	3	0.001	65.018	15.9886	Up	0.00108424	0.00591495
lnc-PGM3-2	294	0	3	0.001	64.7969	15.9836	Up	0.00108424	0.00618611
lnc-ATAD5-3	785	0	6	0.001	64.7969	15.9836	Up	3.85e-06	5.3e-05
lnc-TAF7L-1	295	0	3	0.001	64.5772	15.9787	Up	0.00108424	0.0057599
lnc-CBWD6-2	787	0	8	0.001	64.5499	15.9781	Up	8.97e-08	2.28e-06
lnc-PTTG1-8	492	0	5	0.001	64.5335	15.9778	Up	2.52e-05	0.000269329
lnc-SLITRK5-29	296	0	3	0.001	64.3591	15.9739	Up	0.00108424	0.00611045
lnc-CHCHD7-7	592	0	6	0.001	64.3591	15.9739	Up	3.85e-06	5.44e-05
lnc-GPR179-2	395	0	4	0.001	64.3047	15.9726	Up	0.000165443	0.00127208
lnc-SGCE-1	395	0	4	0.001	64.3047	15.9726	Up	0.000165443	0.00124174
PRPS1L1	1087	0	11	0.001	64.2604	15.9716	Up	3.19e-10	1.48e-08
lnc-CTSZ-11	593	0	6	0.001	64.2505	15.9714	Up	3.85e-06	5.61e-05
lnc-NDUFA5-1	495	0	5	0.001	64.1424	15.969	Up	2.52e-05	0.000273016
lnc-NENF-1	496	0	5	0.001	64.013	15.9661	Up	2.52e-05	0.000269775
lnc-DZIP1-6	298	0	3	0.001	63.9271	15.9641	Up	0.00108424	0.00631456
lnc-CALML5-3	995	0	10	0.001	63.82	15.9617	Up	2.09e-09	8.1e-08
lnc-C5orf62-1	598	0	6	0.001	63.7133	15.9593	Up	3.85e-06	5.75e-05
lnc-PLSCR1-1	499	0	5	0.001	63.6282	15.9574	Up	2.52e-05	0.000275014
LOC101927924	2398	0	24	0.001	63.5539	15.9557	Up	7.75e-21	1.33e-18
lnc-TOM1L1-4	501	0	5	0.001	63.3742	15.9516	Up	2.52e-05	0.000274396
lnc-AC012414.1-5	401	0	4	0.001	63.3426	15.9509	Up	0.000165443	0.00120483
lnc-UBR5-2	201	0	2	0.001	63.185	15.9473	Up	0.0071056	0.0274371
lnc-DCUN1D1-12	804	0	8	0.001	63.185	15.9473	Up	8.97e-08	2.26e-06
lnc-FBXO47-4	302	0	3	0.001	63.0804	15.9449	Up	0.00108424	0.00609714
lnc-RP11-88J22.1.1-4	302	0	3	0.001	63.0804	15.9449	Up	0.00108424	0.00568114
lnc-FAM91A1-1	566	0	7	0.001	63.0506	15.9442	Up	5.88e-07	1.12e-05
lnc-PLGLB1-5	504	0	5	0.001	62.997	15.943	Up	2.52e-05	0.000263518
lnc-FAM198A-4	303	0	3	0.001	62.8722	15.9401	Up	0.00108424	0.00557696
lnc-MBOAT2-3	607	0	6	0.001	62.7686	15.9378	Up	3.85e-06	5.7e-05
lnc-DDX51-9	304	0	3	0.001	62.6654	15.9354	Up	0.00108424	0.00600123
lnc-DYNLRB2-8	203	0	2	0.001	62.5625	15.933	Up	0.0071056	0.0279274
lnc-MYOM2-4	443	0	6	0.001	62.4599	15.9306	Up	3.85e-06	5.58e-05
lnc-RHOBTB2-5	407	0	4	0.001	62.4088	15.9295	Up	0.000165443	0.0012921
lnc-HMBOX1-7	205	0	2	0.001	61.9521	15.9189	Up	0.0071056	0.0250436
lnc-USP42-2	308	0	3	0.001	61.8516	15.9165	Up	0.00108424	0.00635761
lnc-GNG2-2	822	0	8	0.001	61.8014	15.9154	Up	8.97e-08	2.33e-06
lnc-SULT1C4-1	823	0	8	0.001	61.7263	15.9136	Up	8.97e-08	2.19e-06
lnc-AC010507.1-3	412	0	4	0.001	61.6514	15.9118	Up	0.000165443	0.0012976
lnc-TWIST1-3	206	0	2	0.001	61.6514	15.9118	Up	0.0071056	0.0268977
lnc-MC4R-4	309	0	3	0.001	61.6514	15.9118	Up	0.00108424	0.00589584
lnc-HSPB9-4	309	0	3	0.001	61.6514	15.9118	Up	0.00108424	0.00558363
lnc-LRP12-4	412	0	4	0.001	61.6514	15.9118	Up	0.000165443	0.0012071
TAS2R46	930	0	9	0.001	61.4525	15.9072	Up	1.37e-08	4.25e-07
lnc-C6orf118-3	517	0	5	0.001	61.4129	15.9063	Up	2.52e-05	0.000291158
lnc-HIST1H3A-3	517	0	5	0.001	61.4129	15.9063	Up	2.52e-05	0.000286799
lnc-GADL1-1	419	0	5	0.001	61.4129	15.9063	Up	2.52e-05	0.000269999
lnc-RNASEH1-1	517	0	5	0.001	61.4129	15.9063	Up	2.52e-05	0.000268958
lnc-LRRC16A-3	517	0	5	0.001	61.4129	15.9063	Up	2.52e-05	0.000262527
lnc-RFESD-1	725	0	7	0.001	61.3112	15.9039	Up	5.88e-07	1.17e-05
lnc-BAI1-5	1451	0	14	0.001	61.269	15.9029	Up	1.13e-12	8.68e-11
lnc-ATP1B1-2	624	0	6	0.001	61.0586	15.8979	Up	3.85e-06	5.43e-05
lnc-FAM161B-4	1774	0	17	0.001	60.8521	15.893	Up	4.02e-15	4.39e-13
lnc-VPS54-1	522	0	5	0.001	60.8246	15.8924	Up	2.52e-05	0.000279979
lnc-HS3ST1-1	1255	0	12	0.001	60.718	15.8898	Up	4.86e-11	2.81e-09
lnc-AP3S1-8	419	0	4	0.001	60.6214	15.8875	Up	0.000165443	0.00133548
lnc-ZC4H2-1	1362	0	13	0.001	60.6103	15.8873	Up	7.42e-12	4.91e-10
lnc-SPRED2-20	629	0	6	0.001	60.5732	15.8864	Up	3.85e-06	5.36e-05
lnc-MITF-4	945	0	9	0.001	60.4771	15.8841	Up	1.37e-08	4.4e-07
lnc-SFSWAP-4	315	0	3	0.001	60.4771	15.8841	Up	0.00108424	0.00607068
lnc-BAG2-3	315	0	3	0.001	60.4771	15.8841	Up	0.00108424	0.0057694
lnc-DPF3-1	654	0	6	0.001	60.2857	15.8795	Up	3.85e-06	5.49e-05
lnc-C6orf211-1	316	0	3	0.001	60.2857	15.8795	Up	0.00108424	0.00560302
lnc-FBP2-4	739	0	7	0.001	60.1497	15.8763	Up	5.88e-07	1.13e-05
lnc-MAPKAPK5-3	529	0	5	0.001	60.0198	15.8732	Up	2.52e-05	0.000280059
lnc-C3orf15-1	530	0	5	0.001	59.9065	15.8704	Up	2.52e-05	0.000255859
lnc-RFX8-3	425	0	4	0.001	59.7656	15.867	Up	0.000165443	0.0012736
lnc-IRF9-2	320	0	3	0.001	59.5321	15.8614	Up	0.00108424	0.00598411
lnc-MRPL33-1	427	0	4	0.001	59.4857	15.8603	Up	0.000165443	0.00136451
lnc-FAM108B1-1	214	0	2	0.001	59.3467	15.8569	Up	0.0071056	0.0269162
lnc-GPR3-1	428	0	4	0.001	59.3467	15.8569	Up	0.000165443	0.00128561
lnc-RP11-327F22.5.1-3	857	0	8	0.001	59.2774	15.8552	Up	8.97e-08	2.19e-06
lnc-RUFY4-6	322	0	3	0.001	59.1624	15.8524	Up	0.00108424	0.00625247
lnc-OSBPL9-3	1288	0	12	0.001	59.1624	15.8524	Up	4.86e-11	2.73e-09
lnc-HOMER1-6	538	0	5	0.001	59.0157	15.8488	Up	2.52e-05	0.000277514
lnc-SHQ1-2	755	0	7	0.001	58.875	15.8454	Up	5.88e-07	1.09e-05
lnc-IDH3A-1	864	0	8	0.001	58.7972	15.8435	Up	8.97e-08	2.18e-06
lnc-ISX-3	757	0	7	0.001	58.7195	15.8416	Up	5.88e-07	1.09e-05
lnc-G2E3-6	541	0	5	0.001	58.6885	15.8408	Up	2.52e-05	0.000268441
lnc-AMZ2-3	1840	0	17	0.001	58.6693	15.8403	Up	4.02e-15	4.37e-13
lnc-PDE7B-4	433	0	4	0.001	58.6614	15.8401	Up	0.000165443	0.00128022
lnc-TPD52L1-3	325	0	3	0.001	58.6162	15.839	Up	0.00108424	0.00563083
lnc-PGCP.1-3	651	0	6	0.001	58.5262	15.8368	Up	3.85e-06	5.81e-05
lnc-C1orf195-6	326	0	3	0.001	58.4364	15.8346	Up	0.00108424	0.00631932
lnc-PDCD1-3	326	0	3	0.001	58.4364	15.8346	Up	0.00108424	0.005675
lnc-TBL1XR1-13	1632	0	15	0.001	58.3648	15.8328	Up	1.73e-13	1.51e-11
lnc-WDR12-2	1090	0	10	0.001	58.2577	15.8302	Up	2.09e-09	8.12e-08
TAS2R13	1637	0	15	0.001	58.1866	15.8284	Up	1.73e-13	1.52e-11
lnc-KIAA0020-8	764	0	7	0.001	58.1815	15.8283	Up	5.88e-07	1.16e-05
lnc-SLC6A4-1	546	0	5	0.001	58.151	15.8275	Up	2.52e-05	0.000267047
lnc-RORB-4	328	0	3	0.001	58.0801	15.8258	Up	0.00108424	0.00591162
lnc-GFPT1-2	547	0	5	0.001	58.0447	15.8249	Up	2.52e-05	0.000288408
lnc-SEPW1-5	500	0	5	0.001	57.9388	15.8222	Up	2.52e-05	0.000282651
lnc-POLH-1	548	0	5	0.001	57.9388	15.8222	Up	2.52e-05	0.000265451
lnc-TCP11L1-4	329	0	3	0.001	57.9036	15.8214	Up	0.00108424	0.0060219
lnc-C6orf191-4	439	0	4	0.001	57.8596	15.8203	Up	0.000165443	0.00131222
lnc-BTG3-8	879	0	8	0.001	57.7938	15.8186	Up	8.97e-08	2.21e-06
lnc-GCM1-2	440	0	4	0.001	57.7281	15.817	Up	0.000165443	0.00133744
lnc-WDTC1-3	220	0	2	0.001	57.7281	15.817	Up	0.0071056	0.0273471
CARD18	660	0	6	0.001	57.7281	15.817	Up	3.85e-06	5.66e-05
lnc-DYRK2-15	661	0	6	0.001	57.6408	15.8148	Up	3.85e-06	5.45e-05
lnc-THOC5-2	441	0	4	0.001	57.5972	15.8137	Up	0.000165443	0.00124925
lnc-GTF3C1-3	662	0	6	0.001	57.5537	15.8126	Up	3.85e-06	5.44e-05
lnc-NCAM2-16	442	0	4	0.001	57.4669	15.8104	Up	0.000165443	0.0012895
lnc-AC090324.1-5	995	0	9	0.001	57.438	15.8097	Up	1.37e-08	4.32e-07
lnc-PCDH7-12	332	0	3	0.001	57.3804	15.8083	Up	0.00108424	0.00602103
lnc-SPCS3-2	332	0	3	0.001	57.3804	15.8083	Up	0.00108424	0.00586781
lnc-ALG14-4	997	0	9	0.001	57.3228	15.8068	Up	1.37e-08	4.19e-07
lnc-PMP22-5	1773	0	16	0.001	57.3048	15.8064	Up	2.64e-14	2.52e-12
lnc-BLID-2	1000	0	9	0.001	57.1508	15.8025	Up	1.37e-08	4.17e-07
lnc-AC016251.1-1	1930	0	10	0.001	57.0538	15.8	Up	2.09e-09	7.99e-08
lnc-TRIM61-5	446	0	4	0.001	56.9515	15.7974	Up	0.000165443	0.00128047
lnc-RPA3-2	781	0	7	0.001	56.915	15.7965	Up	5.88e-07	1.15e-05
lnc-ABCB5-4	335	0	3	0.001	56.8665	15.7953	Up	0.00108424	0.00633554
lnc-PNPLA4-1	670	0	6	0.001	56.8665	15.7953	Up	3.85e-06	5.4e-05
lnc-FMNL2-4	447	0	4	0.001	56.8241	15.7942	Up	0.000165443	0.00135613
lnc-MMADHC-3	1344	0	12	0.001	56.6973	15.791	Up	4.86e-11	2.75e-09
lnc-RBM25-1	1799	0	16	0.001	56.4767	15.7854	Up	2.64e-14	2.59e-12
lnc-LRRC7-3	563	0	5	0.001	56.3951	15.7833	Up	2.52e-05	0.000267412
lnc-CHIC1-8	451	0	4	0.001	56.3201	15.7814	Up	0.000165443	0.00126205
lnc-SLAIN1-6	451	0	4	0.001	56.3201	15.7814	Up	0.000165443	0.00125463
lnc-CDS2-7	564	0	5	0.001	56.2952	15.7807	Up	2.52e-05	0.000263874
lnc-NBPF9-5	565	0	5	0.001	56.1955	15.7782	Up	2.52e-05	0.000271801
lnc-INTS10-1	905	0	8	0.001	56.1334	15.7766	Up	8.97e-08	2.24e-06
lnc-C10orf137-4	453	0	4	0.001	56.0715	15.775	Up	0.000165443	0.00135872
lnc-ABCC6-1	567	0	5	0.001	55.9973	15.7731	Up	2.52e-05	0.000285542
lnc-IBTK-7	227	0	2	0.001	55.948	15.7718	Up	0.0071056	0.0283535
lnc-OTUD4-4	227	0	2	0.001	55.948	15.7718	Up	0.0071056	0.0283156
lnc-MED10-5	454	0	4	0.001	55.948	15.7718	Up	0.000165443	0.00134842
lnc-MCOLN3-1	227	0	2	0.001	55.948	15.7718	Up	0.0071056	0.0255342
lnc-ZNF746-2	568	0	5	0.001	55.8987	15.7705	Up	2.52e-05	0.000263022
lnc-TMEM241-2	683	0	6	0.001	55.7841	15.7676	Up	3.85e-06	5.64e-05
lnc-MITF-12	228	0	2	0.001	55.7026	15.7655	Up	0.0071056	0.025978
lnc-DZIP1L-3	571	0	5	0.001	55.605	15.7629	Up	2.52e-05	0.000263305
lnc-TRIM29-7	457	0	4	0.001	55.5807	15.7623	Up	0.000165443	0.0012997
lnc-AF186192.1.1-1	572	0	5	0.001	55.5078	15.7604	Up	2.52e-05	0.000269477
lnc-PITX2-1	493	0	4	0.001	55.4593	15.7591	Up	0.000165443	0.00132636
lnc-TEAD2-2	573	0	5	0.001	55.4109	15.7579	Up	2.52e-05	0.000258294
lnc-BMI1-2	459	0	4	0.001	55.3385	15.756	Up	0.000165443	0.00130261
lnc-FOLH1-1	1148	0	10	0.001	55.3144	15.7554	Up	2.09e-09	8.33e-08
lnc-TRIM6-1	1265	0	11	0.001	55.2182	15.7529	Up	3.19e-10	1.46e-08
lnc-ECM2-1	691	0	6	0.001	55.1383	15.7508	Up	3.85e-06	5.48e-05
lnc-SCRN3-8	922	0	8	0.001	55.0984	15.7497	Up	8.97e-08	2.16e-06
lnc-CIT-5	577	0	5	0.001	55.0268	15.7478	Up	2.52e-05	0.000260845
lnc-AKIRIN1-7	462	0	4	0.001	54.9792	15.7466	Up	0.000165443	0.00136801
lnc-ANP32D-2	693	0	6	0.001	54.9792	15.7466	Up	3.85e-06	5.77e-05
lnc-THSD7A-5	231	0	2	0.001	54.9792	15.7466	Up	0.0071056	0.0275443
lnc-DIAPH3-18	348	0	3	0.001	54.7422	15.7404	Up	0.00108424	0.00597389
lnc-PARP1-4	348	0	3	0.001	54.7422	15.7404	Up	0.00108424	0.0059208
lnc-CELF2-9	348	0	3	0.001	54.7422	15.7404	Up	0.00108424	0.00558884
CLIC3	813	0	7	0.001	54.6749	15.7386	Up	5.88e-07	1.16e-05
lnc-USP14-1	813	0	7	0.001	54.6749	15.7386	Up	5.88e-07	1.14e-05
lnc-C1orf143-1	813	0	7	0.001	54.6749	15.7386	Up	5.88e-07	1.13e-05
lnc-MTERF-4	581	0	5	0.001	54.648	15.7379	Up	2.52e-05	0.000255792
lnc-PHLPP2-1	465	0	4	0.001	54.6245	15.7373	Up	0.000165443	0.00129236
lnc-TXNRD1-1	465	0	4	0.001	54.6245	15.7373	Up	0.000165443	0.00128794
lnc-TRIM36-1	465	0	4	0.001	54.6245	15.7373	Up	0.000165443	0.00123029
lnc-LPP-1	698	0	6	0.001	54.5853	15.7362	Up	3.85e-06	5.35e-05
lnc-STX7-1	466	0	4	0.001	54.5072	15.7342	Up	0.000165443	0.00129288
lnc-CCT4-3	699	0	6	0.001	54.5072	15.7342	Up	3.85e-06	5.53e-05
lnc-ARL13B-1	751	0	7	0.001	54.4738	15.7333	Up	5.88e-07	1.11e-05
lnc-SLC36A4-1	583	0	5	0.001	54.4605	15.7329	Up	2.52e-05	0.000277041
lnc-PPP1R3B-9	350	0	3	0.001	54.4294	15.7321	Up	0.00108424	0.00561426
IFNA5	700	0	6	0.001	54.4294	15.7321	Up	3.85e-06	5.32e-05
lnc-PRRG4-1	817	0	7	0.001	54.4072	15.7315	Up	5.88e-07	1.14e-05
lnc-FLOT2-2	467	0	4	0.001	54.3905	15.7311	Up	0.000165443	0.0012237
lnc-SHPRH-4	1052	0	9	0.001	54.3259	15.7294	Up	1.37e-08	4.26e-07
lnc-EDAR-7	468	0	4	0.001	54.2743	15.728	Up	0.000165443	0.00135241
lnc-YES1-2	351	0	3	0.001	54.2743	15.728	Up	0.00108424	0.00608388
lnc-SLCO5A1-9	234	0	2	0.001	54.2743	15.728	Up	0.0071056	0.0257639
lnc-FREM3-3	1171	0	10	0.001	54.228	15.7267	Up	2.09e-09	7.86e-08
lnc-TSPAN12-3	469	0	4	0.001	54.1586	15.7249	Up	0.000165443	0.00122675
lnc-GATS-3	352	0	3	0.001	54.1201	15.7239	Up	0.00108424	0.00629467
lnc-XPO6-2	352	0	3	0.001	54.1201	15.7239	Up	0.00108424	0.00579409
lnc-GTF2F2-9	470	0	4	0.001	54.0433	15.7218	Up	0.000165443	0.00124512
lnc-UBFD1-3	235	0	2	0.001	54.0433	15.7218	Up	0.0071056	0.025346
lnc-STRBP-9	588	0	5	0.001	53.9974	15.7206	Up	2.52e-05	0.00027455
lnc-EVPL-1	1529	0	13	0.001	53.9903	15.7204	Up	7.42e-12	4.88e-10
lnc-AMPH-5	353	0	3	0.001	53.9668	15.7198	Up	0.00108424	0.00569734
lnc-KIAA0586-1	471	0	4	0.001	53.9286	15.7188	Up	0.000165443	0.00125267
lnc-SLC6A2-3	354	0	3	0.001	53.8144	15.7157	Up	0.00108424	0.00580451
lnc-SHB-3	1418	0	12	0.001	53.7384	15.7137	Up	4.86e-11	2.66e-09
lnc-PIRT-2	591	0	5	0.001	53.7233	15.7133	Up	2.52e-05	0.000290465
lnc-CTD-2523D13.1.1-4	490	0	4	0.001	53.7006	15.7127	Up	0.000165443	0.00125439
lnc-MLLT4-3	473	0	4	0.001	53.7006	15.7127	Up	0.000165443	0.0012096
lnc-TLN2-2	592	0	5	0.001	53.6325	15.7108	Up	2.52e-05	0.000291941
lnc-SGCD-3	592	0	5	0.001	53.6325	15.7108	Up	2.52e-05	0.000267559
lnc-UGT2B15-1	593	0	5	0.001	53.5421	15.7084	Up	2.52e-05	0.000262456
lnc-C18orf42-2	1305	0	11	0.001	53.5257	15.7079	Up	3.19e-10	1.56e-08
lnc-SPATA8-4	475	0	4	0.001	53.4745	15.7066	Up	0.000165443	0.00127006
lnc-GSG1L-1	1069	0	9	0.001	53.462	15.7062	Up	1.37e-08	4.14e-07
lnc-DMAP1-6	594	0	5	0.001	53.452	15.706	Up	2.52e-05	0.000281999
lnc-FIGN-1	714	0	6	0.001	53.3621	15.7035	Up	3.85e-06	5.89e-05
lnc-RGS8-2	238	0	2	0.001	53.3621	15.7035	Up	0.0071056	0.0276801
lnc-SEPT14-2	358	0	3	0.001	53.2131	15.6995	Up	0.00108424	0.00613367
CALR	1911	0	16	0.001	53.1667	15.6982	Up	2.64e-14	2.51e-12
lnc-SLC15A4-12	724	0	3	0.001	53.0648	15.6955	Up	0.00108424	0.00581658
lnc-DEPDC4-3	361	0	3	0.001	52.7709	15.6875	Up	0.00108424	0.0056437
OR52N1	963	0	8	0.001	52.7526	15.687	Up	8.97e-08	2.2e-06
lnc-PPIAL4G-21	241	0	2	0.001	52.6979	15.6855	Up	0.0071056	0.0261509
lnc-RGS9-12	482	0	4	0.001	52.6979	15.6855	Up	0.000165443	0.00123313
lnc-PRR14-1	482	0	4	0.001	52.6979	15.6855	Up	0.000165443	0.00120846
lnc-C1D-7	725	0	6	0.001	52.5525	15.6815	Up	3.85e-06	5.86e-05
lnc-ANKRD1-1	363	0	3	0.001	52.4801	15.6795	Up	0.00108424	0.00630034
lnc-SAFB2-5	1210	0	10	0.001	52.4801	15.6795	Up	2.09e-09	7.84e-08
lnc-CIDEA-2	971	0	8	0.001	52.318	15.675	Up	8.97e-08	2.2e-06
DGCR6	1214	0	10	0.001	52.3072	15.6747	Up	2.09e-09	8.36e-08
lnc-ZC3H6-4	243	0	2	0.001	52.2641	15.6735	Up	0.0071056	0.0254092
lnc-C8orf48-6	973	0	8	0.001	52.2104	15.6721	Up	8.97e-08	2.23e-06
lnc-SGK3-1	732	0	6	0.001	52.0499	15.6676	Up	3.85e-06	5.92e-05
lnc-DMGDH-3	244	0	2	0.001	52.0499	15.6676	Up	0.0071056	0.0266475
lnc-XRCC6BP1-7	488	0	4	0.001	52.0499	15.6676	Up	0.000165443	0.00126981
lnc-FRG2-13	610	0	5	0.001	52.0499	15.6676	Up	2.52e-05	0.000267339
lnc-AC004980.12.1-6	734	0	6	0.001	51.9081	15.6637	Up	3.85e-06	5.72e-05
lnc-KIF20B-4	613	0	5	0.001	51.7952	15.6605	Up	2.52e-05	0.000265379
lnc-ADD3-1	368	0	3	0.001	51.7671	15.6597	Up	0.00108424	0.0062562
lnc-ECHDC3-7	368	0	3	0.001	51.7671	15.6597	Up	0.00108424	0.00560152
lnc-SRSF10-1	368	0	3	0.001	51.7671	15.6597	Up	0.00108424	0.00557325
lnc-SLC39A10-13	246	0	2	0.001	51.6268	15.6558	Up	0.0071056	0.0258244
lnc-LOXL3-4	615	0	5	0.001	51.6268	15.6558	Up	2.52e-05	0.000256733
PCNA	1355	0	11	0.001	51.5506	15.6537	Up	3.19e-10	1.51e-08
lnc-MIS18A-3	616	0	5	0.001	51.543	15.6535	Up	2.52e-05	0.000274859
lnc-TNFRSF11A-5	1603	0	13	0.001	51.4979	15.6522	Up	7.42e-12	4.97e-10
lnc-PABPC3-4	370	0	3	0.001	51.4872	15.6519	Up	0.00108424	0.00589833
lnc-FBXO5-4	247	0	2	0.001	51.4178	15.65	Up	0.0071056	0.0282429
MORN2	741	0	6	0.001	51.4178	15.65	Up	3.85e-06	5.34e-05
lnc-ABCA1-6	371	0	3	0.001	51.3485	15.648	Up	0.00108424	0.00584574
lnc-ARHGAP20-1	495	0	4	0.001	51.3139	15.6471	Up	0.000165443	0.00121006
lnc-C9orf71-1	495	0	4	0.001	51.3139	15.6471	Up	0.000165443	0.0012046
lnc-AL139008.2-3	619	0	5	0.001	51.2932	15.6465	Up	2.52e-05	0.000283061
lnc-SRY-7	619	0	5	0.001	51.2932	15.6465	Up	2.52e-05	0.000276102
lnc-A1BG-2	1070	0	7	0.001	51.2695	15.6458	Up	5.88e-07	1.1e-05
lnc-OSBPL1A-10	248	0	2	0.001	51.2104	15.6442	Up	0.0071056	0.0262909
lnc-CSGALNACT1-4	372	0	3	0.001	51.2104	15.6442	Up	0.00108424	0.00572454
lnc-NFIC-2	881	0	2	0.001	51.2104	15.6442	Up	0.0071056	0.0257133
lnc-TMEM26-2	497	0	4	0.001	51.1074	15.6412	Up	0.000165443	0.00131061
lnc-XRCC6BP1-3	373	0	3	0.001	51.0731	15.6403	Up	0.00108424	0.00601672
lnc-FAM46C-3	1492	0	12	0.001	51.0731	15.6403	Up	4.86e-11	2.68e-09
lnc-TEX12-2	746	0	6	0.001	51.0731	15.6403	Up	3.85e-06	5.48e-05
lnc-RABL3-1	1289	0	6	0.001	51.0048	15.6383	Up	3.85e-06	5.75e-05
lnc-TSR1-3	374	0	3	0.001	50.9366	15.6364	Up	0.00108424	0.00555923
lnc-GXYLT1-1	499	0	4	0.001	50.9026	15.6355	Up	0.000165443	0.0013619
lnc-CAPS2-1	1000	0	8	0.001	50.8007	15.6326	Up	8.97e-08	2.34e-06
lnc-TRDMT1-3	250	0	2	0.001	50.8007	15.6326	Up	0.0071056	0.0283098
lnc-FAM182A-5	626	0	5	0.001	50.7196	15.6303	Up	2.52e-05	0.000280541
lnc-C1orf31-9	626	0	5	0.001	50.7196	15.6303	Up	2.52e-05	0.000264732
lnc-VRTN-1	376	0	3	0.001	50.6656	15.6287	Up	0.00108424	0.00564978
lnc-TULP2-5	377	0	3	0.001	50.5312	15.6249	Up	0.00108424	0.00580611
lnc-PTPRB-2	629	0	5	0.001	50.4777	15.6234	Up	2.52e-05	0.000273093
lnc-PARVA-6	1134	0	9	0.001	50.3976	15.6211	Up	1.37e-08	4.2e-07
lnc-IGFN1-4	631	0	5	0.001	50.3177	15.6188	Up	2.52e-05	0.000287305
lnc-FZD10-7	505	0	4	0.001	50.2978	15.6182	Up	0.000165443	0.00134672
SLC31A2	1774	0	14	0.001	50.1135	15.6129	Up	1.13e-12	8.85e-11
lnc-ALDH18A1-1	254	0	2	0.001	50.0007	15.6097	Up	0.0071056	0.0261634
lnc-MLL5-11	889	0	7	0.001	50.0007	15.6097	Up	5.88e-07	1.11e-05
lnc-NEUROG3-4	892	0	7	0.001	49.8326	15.6048	Up	5.88e-07	1.15e-05
lnc-KLHDC5-3	510	0	4	0.001	49.8047	15.604	Up	0.000165443	0.0012055
lnc-ZNF608-3	638	0	5	0.001	49.7656	15.6029	Up	2.52e-05	0.00028471
lnc-C12orf70-3	511	0	4	0.001	49.7072	15.6012	Up	0.000165443	0.00133437
lnc-RAB42-1	256	0	2	0.001	49.6101	15.5983	Up	0.0071056	0.0254964
lnc-TTLL7-7	641	0	5	0.001	49.5327	15.5961	Up	2.52e-05	0.000277987
lnc-PTP4A1-8	385	0	3	0.001	49.4812	15.5946	Up	0.00108424	0.00619525
lnc-SLITRK6-21	771	0	6	0.001	49.4171	15.5927	Up	3.85e-06	5.66e-05
lnc-SNX16-2	257	0	2	0.001	49.4171	15.5927	Up	0.0071056	0.0254186
lnc-C6orf221-2	1285	0	10	0.001	49.4171	15.5927	Up	2.09e-09	7.76e-08
lnc-ZNF415-1	386	0	3	0.001	49.3531	15.5909	Up	0.00108424	0.00626929
lnc-C4orf37-1	772	0	6	0.001	49.3531	15.5909	Up	3.85e-06	5.62e-05
lnc-SKA1-3	646	0	5	0.001	49.1493	15.5849	Up	2.52e-05	0.00027618
lnc-THSD4-2	647	0	5	0.001	49.0734	15.5827	Up	2.52e-05	0.000283471
lnc-SMO-1	259	0	2	0.001	49.0355	15.5815	Up	0.0071056	0.0254257
lnc-FAM83F-5	648	0	5	0.001	48.9976	15.5804	Up	2.52e-05	0.000280139
lnc-C14orf101-7	649	0	5	0.001	48.9221	15.5782	Up	2.52e-05	0.000283718
lnc-LPHN3-14	520	0	4	0.001	48.8469	15.576	Up	0.000165443	0.00137006
lnc-CCNYL2-9	260	0	2	0.001	48.8469	15.576	Up	0.0071056	0.0260889
lnc-ANKRD33-5	391	0	3	0.001	48.7219	15.5723	Up	0.00108424	0.00615617
lnc-AP3S1-3	522	0	4	0.001	48.6597	15.5704	Up	0.000165443	0.00124006
lnc-DYNLT1-1	2226	0	17	0.001	48.4958	15.5656	Up	4.02e-15	4.4e-13
lnc-WHSC1L1-4	262	0	2	0.001	48.474	15.5649	Up	0.0071056	0.0286161
lnc-RP11-451M19.3.1-2	393	0	3	0.001	48.474	15.5649	Up	0.00108424	0.00633267
lnc-CCL4L1-1	393	0	3	0.001	48.474	15.5649	Up	0.00108424	0.00619616
lnc-HAND1-9	786	0	6	0.001	48.474	15.5649	Up	3.85e-06	5.35e-05
lnc-MYO15B-4	656	0	5	0.001	48.4001	15.5627	Up	2.52e-05	0.000265019
lnc-CCDC17-3	788	0	6	0.001	48.351	15.5613	Up	3.85e-06	5.42e-05
lnc-UBE2Z-2	657	0	5	0.001	48.3264	15.5605	Up	2.52e-05	0.000278542
lnc-L1TD1-3	526	0	4	0.001	48.2897	15.5594	Up	0.000165443	0.00134757
lnc-GNRHR-3	395	0	3	0.001	48.2286	15.5576	Up	0.00108424	0.00563688
lnc-AP002414.1.1-1	527	0	4	0.001	48.1981	15.5567	Up	0.000165443	0.00127512
lnc-PANK3-7	527	0	4	0.001	48.1981	15.5567	Up	0.000165443	0.00126905
LOC646029	1845	0	14	0.001	48.185	15.5563	Up	1.13e-12	8.63e-11
lnc-TIGIT-2	396	0	3	0.001	48.1068	15.554	Up	0.00108424	0.00629845
lnc-CDK5RAP1-2	396	0	3	0.001	48.1068	15.554	Up	0.00108424	0.00561727
lnc-UBAP1-5	529	0	4	0.001	48.0158	15.5512	Up	0.000165443	0.00134136
lnc-TMTC3-6	926	0	7	0.001	48.0029	15.5508	Up	5.88e-07	1.19e-05
lnc-EMB-1	794	0	6	0.001	47.9856	15.5503	Up	3.85e-06	5.29e-05
lnc-ZNF730-16	928	0	7	0.001	47.8994	15.5477	Up	5.88e-07	1.12e-05
lnc-RPL14-1	2122	0	16	0.001	47.8801	15.5471	Up	2.64e-14	2.53e-12
lnc-C7orf66-1	398	0	3	0.001	47.865	15.5467	Up	0.00108424	0.00583924
lnc-ACO1-5	664	0	5	0.001	47.817	15.5452	Up	2.52e-05	0.000277356
lnc-RPL5-4	797	0	6	0.001	47.805	15.5449	Up	3.85e-06	5.71e-05
lnc-TIMM9-1	399	0	3	0.001	47.7451	15.5431	Up	0.00108424	0.00597049
lnc-TTC35-7	532	0	4	0.001	47.7451	15.5431	Up	0.000165443	0.00125907
lnc-CNN3-3	532	0	4	0.001	47.7451	15.5431	Up	0.000165443	0.00121627
lnc-PAQR9-3	909	0	5	0.001	47.6734	15.5409	Up	2.52e-05	0.000255993
OR5W2	933	0	7	0.001	47.6427	15.54	Up	5.88e-07	1.13e-05
lnc-KDM4B-6	400	0	3	0.001	47.6257	15.5395	Up	0.00108424	0.00614805
lnc-ZBTB33-1	400	0	3	0.001	47.6257	15.5395	Up	0.00108424	0.00567884
lnc-ADCY3-2	267	0	2	0.001	47.5662	15.5377	Up	0.0071056	0.02601
lnc-UTP18-4	535	0	4	0.001	47.4773	15.535	Up	0.000165443	0.00126554
lnc-CHODL-6	268	0	2	0.001	47.3888	15.5323	Up	0.0071056	0.0279048
lnc-CCDC125-15	536	0	4	0.001	47.3888	15.5323	Up	0.000165443	0.00128304
lnc-RALGAPA2-7	536	0	4	0.001	47.3888	15.5323	Up	0.000165443	0.00125808
lnc-PKN2-5	2281	0	17	0.001	47.3264	15.5304	Up	4.02e-15	4.41e-13
lnc-PAFAH1B1-7	537	0	4	0.001	47.3005	15.5296	Up	0.000165443	0.00126006
lnc-MC4R-1	807	0	6	0.001	47.2126	15.5269	Up	3.85e-06	5.92e-05
lnc-TERF2-1	269	0	2	0.001	47.2126	15.5269	Up	0.0071056	0.0278088
lnc-MICU1-1	269	0	2	0.001	47.2126	15.5269	Up	0.0071056	0.0267955
lnc-NECAB1-5	269	0	2	0.001	47.2126	15.5269	Up	0.0071056	0.0266786
lnc-SRPK2-2	538	0	4	0.001	47.2126	15.5269	Up	0.000165443	0.00123934
lnc-GHRH-2	673	0	5	0.001	47.1775	15.5258	Up	2.52e-05	0.000290638
lnc-ANO6-2	673	0	5	0.001	47.1775	15.5258	Up	2.52e-05	0.000263163
lnc-CA5A-11	270	0	2	0.001	47.0377	15.5215	Up	0.0071056	0.0274125
lnc-CEBPB-8	405	0	3	0.001	47.0377	15.5215	Up	0.00108424	0.00560003
lnc-SLC16A4-2	405	0	3	0.001	47.0377	15.5215	Up	0.00108424	0.00557547
lnc-SIX2-2	1350	0	10	0.001	47.0377	15.5215	Up	2.09e-09	7.7e-08
lnc-CLDN10-3	406	0	3	0.001	46.9219	15.518	Up	0.00108424	0.00606016
lnc-HOMER1-3	406	0	3	0.001	46.9219	15.518	Up	0.00108424	0.00565588
lnc-MARVELD3-1	406	0	3	0.001	46.9219	15.518	Up	0.00108424	0.00555849
lnc-TTK-5	949	0	7	0.001	46.8395	15.5154	Up	5.88e-07	1.09e-05
TH2LCRR	407	0	3	0.001	46.8066	15.5144	Up	0.00108424	0.00570353
lnc-PTTG1-4	814	0	6	0.001	46.8066	15.5144	Up	3.85e-06	5.29e-05
lnc-TSEN2-5	272	0	2	0.001	46.6919	15.5109	Up	0.0071056	0.0256893
lnc-ADRA1D-3	870	0	3	0.001	46.6919	15.5109	Up	0.00108424	0.00559405
lnc-CLDN5-2	953	0	7	0.001	46.6429	15.5094	Up	5.88e-07	1.11e-05
lnc-WRNIP1-12	545	0	4	0.001	46.6062	15.5082	Up	0.000165443	0.00133187
lnc-AC092964.1-4	682	0	5	0.001	46.5549	15.5066	Up	2.52e-05	0.000267193
lnc-INSL4-1	273	0	2	0.001	46.5208	15.5056	Up	0.0071056	0.0275277
lnc-RBMY1D-1	410	0	3	0.001	46.4641	15.5038	Up	0.00108424	0.00618247
lnc-UGT2A3-9	685	0	5	0.001	46.351	15.5003	Up	2.52e-05	0.000284627
lnc-HEATR5B-1	411	0	3	0.001	46.351	15.5003	Up	0.00108424	0.00617428
lnc-SPP2-5	688	0	5	0.001	46.1489	15.494	Up	2.52e-05	0.000263589
lnc-PCDH8-9	413	0	3	0.001	46.1266	15.4933	Up	0.00108424	0.00616159
lnc-BTBD6-1	413	0	3	0.001	46.1266	15.4933	Up	0.00108424	0.00614265
lnc-ZNF577-1	826	0	6	0.001	46.1266	15.4933	Up	3.85e-06	5.39e-05
lnc-CA8-4	689	0	5	0.001	46.082	15.4919	Up	2.52e-05	0.000287898
lnc-ZNF93-1	763	0	8	0.001	46.0569	15.4911	Up	8.97e-08	2.2e-06
lnc-XRCC2-11	276	0	2	0.001	46.0152	15.4898	Up	0.0071056	0.0280014
lnc-GLOD4-2	276	0	2	0.001	46.0152	15.4898	Up	0.0071056	0.0253928
lnc-PPIAL4G-7	967	0	7	0.001	45.9676	15.4883	Up	5.88e-07	1.08e-05
lnc-DEFB116-2	553	0	4	0.001	45.932	15.4872	Up	0.000165443	0.00133354
lnc-KCTD6-7	553	0	4	0.001	45.932	15.4872	Up	0.000165443	0.00128846
lnc-DMTF1-4	553	0	4	0.001	45.932	15.4872	Up	0.000165443	0.00120938
lnc-SERPING1-2	415	0	3	0.001	45.9043	15.4863	Up	0.00108424	0.00617974
lnc-ZMAT3-6	415	0	3	0.001	45.9043	15.4863	Up	0.00108424	0.00570819
EXOSC7	1246	0	9	0.001	45.8674	15.4852	Up	1.37e-08	4.23e-07
lnc-ZSCAN20-1	554	0	4	0.001	45.849	15.4846	Up	0.000165443	0.00136567
lnc-RPP30-9	831	0	6	0.001	45.849	15.4846	Up	3.85e-06	5.72e-05
BOLA3	554	0	4	0.001	45.849	15.4846	Up	0.000165443	0.00130129
lnc-FILIP1-2	756	0	6	0.001	45.849	15.4846	Up	3.85e-06	5.5e-05
KDF1	1803	0	13	0.001	45.7855	15.4826	Up	7.42e-12	5.03e-10
lnc-PRPF38A-1	556	0	4	0.001	45.6841	15.4794	Up	0.000165443	0.00133883
lnc-RPS6KA6-5	417	0	3	0.001	45.6841	15.4794	Up	0.00108424	0.00612472
lnc-ZNF10-3	556	0	4	0.001	45.6841	15.4794	Up	0.000165443	0.00125685
lnc-CTTNBP2-7	973	0	7	0.001	45.6841	15.4794	Up	5.88e-07	1.08e-05
lnc-BIVM-1	1947	0	14	0.001	45.6607	15.4787	Up	1.13e-12	8.73e-11
lnc-GPATCH4-1	974	0	7	0.001	45.6372	15.4779	Up	5.88e-07	1.18e-05
lnc-ANKRD30BL-3	1253	0	9	0.001	45.6112	15.4771	Up	1.37e-08	4.09e-07
lnc-ALPK1-3	557	0	4	0.001	45.6021	15.4768	Up	0.000165443	0.00133604
TCEAL6	1532	0	11	0.001	45.5947	15.4766	Up	3.19e-10	1.55e-08
lnc-DLGAP4-1	1393	0	10	0.001	45.5857	15.4763	Up	2.09e-09	7.83e-08
lnc-PGAP1-3	1115	0	8	0.001	45.5612	15.4755	Up	8.97e-08	2.28e-06
lnc-NKIRAS1-3	697	0	5	0.001	45.553	15.4753	Up	2.52e-05	0.00027579
lnc-UHRF2-6	697	0	5	0.001	45.553	15.4753	Up	2.52e-05	0.00025946
lnc-SUSD2-1	558	0	4	0.001	45.5204	15.4742	Up	0.000165443	0.0013683
lnc-RGMA-12	559	0	4	0.001	45.439	15.4716	Up	0.000165443	0.00127588
lnc-AC016251.1-21	1258	0	9	0.001	45.4299	15.4714	Up	1.37e-08	4.41e-07
lnc-NFE2-1	280	0	2	0.001	45.3578	15.4691	Up	0.0071056	0.0258195
lnc-ZNF507-8	560	0	4	0.001	45.3578	15.4691	Up	0.000165443	0.00122137
lnc-LANCL2-9	452	0	4	0.001	45.277	15.4665	Up	0.000165443	0.00124415
LINC00350	562	0	4	0.001	45.1964	15.4639	Up	0.000165443	0.00136538
lnc-CHTF8-2	562	0	4	0.001	45.1964	15.4639	Up	0.000165443	0.00129314
lnc-DUSP10-4	562	0	4	0.001	45.1964	15.4639	Up	0.000165443	0.00122417
lnc-RP11-277P12.7.1-1	562	0	4	0.001	45.1964	15.4639	Up	0.000165443	0.00121029
lnc-ANKRD30B-10	281	0	2	0.001	45.1964	15.4639	Up	0.0071056	0.0250802
lnc-BTNL8-8	1828	0	13	0.001	45.1593	15.4627	Up	7.42e-12	4.88e-10
lnc-H2AFV-1	422	0	3	0.001	45.1428	15.4622	Up	0.00108424	0.00614715
lnc-GBA2-1	422	0	3	0.001	45.1428	15.4622	Up	0.00108424	0.00557992
lnc-C1orf87-7	1269	0	9	0.001	45.0361	15.4588	Up	1.37e-08	4.4e-07
lnc-C9orf43-6	671	0	4	0.001	45.0361	15.4588	Up	0.000165443	0.00135184
lnc-DNAJC22-3	564	0	4	0.001	45.0361	15.4588	Up	0.000165443	0.00131979
lnc-PCSK2-1	423	0	3	0.001	45.0361	15.4588	Up	0.00108424	0.00607331
lnc-LONP2-7	282	0	2	0.001	45.0361	15.4588	Up	0.0071056	0.0252575
lnc-AC090324.1-6	847	0	6	0.001	44.983	15.4571	Up	3.85e-06	5.57e-05
lnc-CASP5-2	424	0	3	0.001	44.9299	15.4554	Up	0.00108424	0.0058588
lnc-KLRB1-2	707	0	5	0.001	44.9087	15.4547	Up	2.52e-05	0.000273245
lnc-GRM1-4	707	0	5	0.001	44.9087	15.4547	Up	2.52e-05	0.000262809
lnc-XPO5-1	990	0	7	0.001	44.8996	15.4544	Up	5.88e-07	1.1e-05
lnc-ZNF816-2	827	0	4	0.001	44.877	15.4537	Up	0.000165443	0.00129262
lnc-TTC14-1	283	0	2	0.001	44.877	15.4537	Up	0.0071056	0.0268452
lnc-TRMT61B-3	849	0	6	0.001	44.877	15.4537	Up	3.85e-06	5.51e-05
lnc-FRK-2	283	0	2	0.001	44.877	15.4537	Up	0.0071056	0.0263211
lnc-CDH8-4	566	0	4	0.001	44.877	15.4537	Up	0.000165443	0.00125169
lnc-MAP6-6	425	0	3	0.001	44.8242	15.452	Up	0.00108424	0.00617701
lnc-TIMP3-4	567	0	4	0.001	44.7978	15.4511	Up	0.000165443	0.00125144
lnc-MEIS1-11	567	0	4	0.001	44.7978	15.4511	Up	0.000165443	0.00123814
lnc-CISD1-3	709	0	5	0.001	44.782	15.4506	Up	2.52e-05	0.000271726
lnc-NTSR2-5	851	0	6	0.001	44.7715	15.4503	Up	3.85e-06	5.3e-05
C10orf82	994	0	7	0.001	44.719	15.4486	Up	5.88e-07	1.13e-05
lnc-RP11-214N1.1.1-3	710	0	5	0.001	44.719	15.4486	Up	2.52e-05	0.000269552
lnc-PKHD1-4	568	0	4	0.001	44.719	15.4486	Up	0.000165443	0.00121258
lnc-EIF2AK3-11	426	0	3	0.001	44.719	15.4486	Up	0.00108424	0.00558586
lnc-OR10AB1P-3	711	0	5	0.001	44.6561	15.4466	Up	2.52e-05	0.000259943
lnc-AP003068.6.1-2	569	0	4	0.001	44.6404	15.4461	Up	0.000165443	0.00132007
lnc-TMEM144-2	569	0	4	0.001	44.6404	15.4461	Up	0.000165443	0.00120801
lnc-PCDHA1-1	712	0	5	0.001	44.5934	15.4445	Up	2.52e-05	0.000275324
lnc-IL1B-1	285	0	2	0.001	44.5621	15.4435	Up	0.0071056	0.0279985
lnc-SUB1-2	285	0	2	0.001	44.5621	15.4435	Up	0.0071056	0.0270193
lnc-IRG1-1	1284	0	9	0.001	44.51	15.4418	Up	1.37e-08	4.25e-07
lnc-NR4A2-3	571	0	4	0.001	44.484	15.441	Up	0.000165443	0.00126031
lnc-MSN-3	857	0	6	0.001	44.4581	15.4402	Up	3.85e-06	5.32e-05
lnc-INSIG2-5	286	0	2	0.001	44.4062	15.4385	Up	0.0071056	0.0283711
lnc-RIMKLB-4	572	0	4	0.001	44.4062	15.4385	Up	0.000165443	0.00136219
lnc-RSPH9-2	429	0	3	0.001	44.4062	15.4385	Up	0.00108424	0.00585308
lnc-C7orf62-4	429	0	3	0.001	44.4062	15.4385	Up	0.00108424	0.0058295
lnc-LRRC4C-1	859	0	6	0.001	44.3546	15.4368	Up	3.85e-06	5.38e-05
lnc-KCNV2-13	716	0	5	0.001	44.3442	15.4365	Up	2.52e-05	0.000262315
lnc-SLC7A1-8	430	0	3	0.001	44.303	15.4351	Up	0.00108424	0.00589336
lnc-ATP10A-6	430	0	3	0.001	44.303	15.4351	Up	0.00108424	0.00575831
lnc-FAM83G-4	287	0	2	0.001	44.2515	15.4334	Up	0.0071056	0.0250962
lnc-LTBP1-2	574	0	4	0.001	44.2515	15.4334	Up	0.000165443	0.00120687
lnc-TMEM242-7	718	0	5	0.001	44.2207	15.4324	Up	2.52e-05	0.000259874
lnc-ITLN2-1	575	0	4	0.001	44.1746	15.4309	Up	0.000165443	0.00136742
lnc-ZNF486-6	575	0	4	0.001	44.1746	15.4309	Up	0.000165443	0.0013005
lnc-SBDS-6	575	0	4	0.001	44.1746	15.4309	Up	0.000165443	0.00128458
lnc-SOD1-10	576	0	4	0.001	44.0979	15.4284	Up	0.000165443	0.00131762
lnc-RALB-4	288	0	2	0.001	44.0979	15.4284	Up	0.0071056	0.0269373
lnc-CDH1-5	576	0	4	0.001	44.0979	15.4284	Up	0.000165443	0.00125611
lnc-ZNF506-6	577	0	4	0.001	44.0214	15.4259	Up	0.000165443	0.0013567
lnc-MN1-3	577	0	4	0.001	44.0214	15.4259	Up	0.000165443	0.0012833
lnc-ERAP2-7	617	0	4	0.001	43.9453	15.4234	Up	0.000165443	0.00134899
lnc-USP9Y-9	289	0	2	0.001	43.9453	15.4234	Up	0.0071056	0.0274508
lnc-GRIP1-6	289	0	2	0.001	43.9453	15.4234	Up	0.0071056	0.0271446
lnc-MRPL46.1-9	2604	0	18	0.001	43.8947	15.4218	Up	6.14e-16	7.24e-14
lnc-TMEM99-3	724	0	5	0.001	43.8542	15.4204	Up	2.52e-05	0.000274319
lnc-SCRN3-7	1448	0	10	0.001	43.8542	15.4204	Up	2.09e-09	7.96e-08
lnc-PIEZO2-11	725	0	5	0.001	43.7937	15.4184	Up	2.52e-05	0.00029012
lnc-RP11-785H20.1.1-3	1161	0	8	0.001	43.756	15.4172	Up	8.97e-08	2.31e-06
lnc-UBE2E3-9	581	0	4	0.001	43.7184	15.416	Up	0.000165443	0.00130314
lnc-ATG12-9	582	0	4	0.001	43.6433	15.4135	Up	0.000165443	0.00121904
lnc-LYZL1-11	1164	0	8	0.001	43.6433	15.4135	Up	8.97e-08	2.17e-06
lnc-ADAM32-2	583	0	4	0.001	43.5684	15.411	Up	0.000165443	0.00130713
lnc-AL135998.1-1	498	0	4	0.001	43.5684	15.411	Up	0.000165443	0.00121951
lnc-CYP11B2-1	875	0	6	0.001	43.5435	15.4102	Up	3.85e-06	5.56e-05
lnc-TSPO2-2	730	0	5	0.001	43.4938	15.4085	Up	2.52e-05	0.000285626
lnc-RGS17-3	438	0	3	0.001	43.4938	15.4085	Up	0.00108424	0.00606892
lnc-NUCB1-2	438	0	3	0.001	43.4938	15.4085	Up	0.00108424	0.0059807
C1orf194	731	0	5	0.001	43.4343	15.4065	Up	2.52e-05	0.000291244
lnc-ATP1B3-1	731	0	5	0.001	43.4343	15.4065	Up	2.52e-05	0.000279019
lnc-ANKRD10-10	585	0	4	0.001	43.4194	15.4061	Up	0.000165443	0.00135642
lnc-CLCNKB-4	439	0	3	0.001	43.3947	15.4052	Up	0.00108424	0.0055948
lnc-MAP3K1-5	732	0	5	0.001	43.375	15.4046	Up	2.52e-05	0.000288493
lnc-PPP4C-7	586	0	4	0.001	43.3453	15.4036	Up	0.000165443	0.00129891
lnc-STX17-5	879	0	6	0.001	43.3453	15.4036	Up	3.85e-06	5.48e-05
lnc-EXOC2-18	293	0	2	0.001	43.3453	15.4036	Up	0.0071056	0.0252947
lnc-ZNF100-7	2051	0	14	0.001	43.3453	15.4036	Up	1.13e-12	8.53e-11
lnc-MRPL44-4	2200	0	15	0.001	43.2961	15.4019	Up	1.73e-13	1.5e-11
lnc-NIPAL2-2	587	0	4	0.001	43.2715	15.4011	Up	0.000165443	0.00132938
lnc-KRTAP5-6-1	587	0	4	0.001	43.2715	15.4011	Up	0.000165443	0.00127233
lnc-ZNF487P-3	1028	0	7	0.001	43.2399	15.4001	Up	5.88e-07	1.18e-05
lnc-CD109-2	441	0	3	0.001	43.1979	15.3987	Up	0.00108424	0.00637499
lnc-NFYC-1	294	0	2	0.001	43.1979	15.3987	Up	0.0071056	0.0271205
lnc-EMILIN3-4	441	0	3	0.001	43.1979	15.3987	Up	0.00108424	0.00584168
lnc-MRPL39-26	441	0	3	0.001	43.1979	15.3987	Up	0.00108424	0.00565435
lnc-ZNF680-30	883	0	6	0.001	43.149	15.397	Up	3.85e-06	5.73e-05
lnc-WNT5B-3	2355	0	16	0.001	43.1429	15.3968	Up	2.64e-14	2.58e-12
lnc-CSMD2-1	736	0	5	0.001	43.1392	15.3967	Up	2.52e-05	0.000261964
lnc-OSTBETA.1-1	589	0	4	0.001	43.1246	15.3962	Up	0.000165443	0.00136422
lnc-FAM117B-7	589	0	4	0.001	43.1246	15.3962	Up	0.000165443	0.00134248
lnc-MRPS30-4	442	0	3	0.001	43.1002	15.3954	Up	0.00108424	0.00618702
lnc-MUSK-5	295	0	2	0.001	43.0515	15.3938	Up	0.0071056	0.0269478
lnc-MMADHC-12	738	0	4	0.001	43.0515	15.3938	Up	0.000165443	0.00120664
lnc-RP11-404P21.6.1-1	738	0	5	0.001	43.0223	15.3928	Up	2.52e-05	0.000288663
lnc-ADAMTS14-1	591	0	4	0.001	42.9786	15.3913	Up	0.000165443	0.00133077
lnc-MMP16-4	591	0	4	0.001	42.9786	15.3913	Up	0.000165443	0.00131519
lnc-MRPS30-1	591	0	4	0.001	42.9786	15.3913	Up	0.000165443	0.00127461
lnc-GRB10-2	739	0	5	0.001	42.9641	15.3908	Up	2.52e-05	0.000273705
lnc-DHDH-1	444	0	3	0.001	42.906	15.3889	Up	0.00108424	0.00611134
lnc-PTP4A2-4	296	0	2	0.001	42.906	15.3889	Up	0.0071056	0.0266812
lnc-OBFC1-3	296	0	2	0.001	42.906	15.3889	Up	0.0071056	0.0265652
lnc-YEATS4-2	296	0	2	0.001	42.906	15.3889	Up	0.0071056	0.0265293
KRTAP3-1	593	0	4	0.001	42.8337	15.3865	Up	0.000165443	0.00134305
lnc-RAB2B-1	297	0	2	0.001	42.7616	15.384	Up	0.0071056	0.0282981
lnc-FAM174A-5	297	0	2	0.001	42.7616	15.384	Up	0.0071056	0.0277583
lnc-ANAPC7-1	297	0	2	0.001	42.7616	15.384	Up	0.0071056	0.027708
lnc-FBXW7-8	297	0	2	0.001	42.7616	15.384	Up	0.0071056	0.0263362
lnc-FAM155B-3	594	0	4	0.001	42.7616	15.384	Up	0.000165443	0.00123646
lnc-POTED-7	893	0	6	0.001	42.6658	15.3808	Up	3.85e-06	5.56e-05
lnc-MYCN-14	596	0	4	0.001	42.6181	15.3792	Up	0.000165443	0.0012618
lnc-KARS-1	298	0	2	0.001	42.6181	15.3792	Up	0.0071056	0.0256509
lnc-PHF14-11	298	0	2	0.001	42.6181	15.3792	Up	0.0071056	0.025558
lnc-FOXD4L3-7	298	0	2	0.001	42.6181	15.3792	Up	0.0071056	0.0255153
lnc-SNRPD1-1	745	0	5	0.001	42.6181	15.3792	Up	2.52e-05	0.000257003
lnc-AC037487.1-6	264	0	3	0.001	42.5229	15.376	Up	0.00108424	0.00618429
lnc-SEMA4G-2	448	0	3	0.001	42.5229	15.376	Up	0.00108424	0.0059978
lnc-RHOXF1-2	448	0	3	0.001	42.5229	15.376	Up	0.00108424	0.0059058
lnc-TMEM17-1	747	0	5	0.001	42.504	15.3753	Up	2.52e-05	0.00027218
lnc-CD300A-1	299	0	2	0.001	42.4755	15.3743	Up	0.0071056	0.0284151
lnc-CCL1-2	299	0	2	0.001	42.4755	15.3743	Up	0.0071056	0.0268898
lnc-KIF25-5	449	0	3	0.001	42.4282	15.3727	Up	0.00108424	0.00616612
lnc-IFNAR2-1	449	0	3	0.001	42.4282	15.3727	Up	0.00108424	0.00586289
lnc-SLCO4C1-2	450	0	3	0.001	42.334	15.3695	Up	0.00108424	0.00625434
lnc-KCNT1-7	300	0	2	0.001	42.334	15.3695	Up	0.0071056	0.0267148
lnc-MAN2A1-4	600	0	4	0.001	42.334	15.3695	Up	0.000165443	0.00128201
lnc-WARS-2	1050	0	7	0.001	42.334	15.3695	Up	5.88e-07	1.12e-05
lnc-FBXO18-1	750	0	5	0.001	42.334	15.3695	Up	2.52e-05	0.000263234
lnc-DENR-2	961	0	5	0.001	42.2776	15.3676	Up	2.52e-05	0.000283801
lnc-PPIL2-6	751	0	5	0.001	42.2776	15.3676	Up	2.52e-05	0.000281025
lnc-KLHL13-2	1052	0	7	0.001	42.2535	15.3668	Up	5.88e-07	1.08e-05
lnc-RNF13-4	1806	0	12	0.001	42.1933	15.3647	Up	4.86e-11	2.76e-09
lnc-COMTD1-2	452	0	3	0.001	42.1466	15.3631	Up	0.00108424	0.00595693
lnc-CIT-10	1357	0	9	0.001	42.1156	15.3621	Up	1.37e-08	4.36e-07
lnc-C3orf37-5	754	0	5	0.001	42.1094	15.3619	Up	2.52e-05	0.000269626
lnc-HEATR4-4	604	0	4	0.001	42.0536	15.3599	Up	0.000165443	0.00123194
lnc-CBX4-3	302	0	2	0.001	42.0536	15.3599	Up	0.0071056	0.0250779
lnc-SLC35A5-3	756	0	5	0.001	41.998	15.358	Up	2.52e-05	0.00026022
lnc-C8orf34-2	454	0	3	0.001	41.961	15.3568	Up	0.00108424	0.00623112
lnc-PPP1R3B-4	454	0	3	0.001	41.961	15.3568	Up	0.00108424	0.00620257
lnc-NDRG1-3	454	0	3	0.001	41.961	15.3568	Up	0.00108424	0.00610157
lnc-RPN2-4	454	0	3	0.001	41.961	15.3568	Up	0.00108424	0.0060038
lnc-MAGEB6-1	606	0	4	0.001	41.9148	15.3552	Up	0.000165443	0.00135699
lnc-CADM1-10	606	0	4	0.001	41.9148	15.3552	Up	0.000165443	0.00126106
CRYGA	606	0	4	0.001	41.9148	15.3552	Up	0.000165443	0.00122114
lnc-GRHL2-11	758	0	5	0.001	41.8872	15.3542	Up	2.52e-05	0.000260706
lnc-LRRC52-5	1517	0	10	0.001	41.8595	15.3533	Up	2.09e-09	8.07e-08
lnc-TAS2R1-2	759	0	5	0.001	41.832	15.3523	Up	2.52e-05	0.000256262
PSMD7	1670	0	11	0.001	41.827	15.3521	Up	3.19e-10	1.47e-08
lnc-LPHN2-5	1215	0	8	0.001	41.8113	15.3516	Up	8.97e-08	2.22e-06
lnc-COL8A1-8	457	0	3	0.001	41.6855	15.3473	Up	0.00108424	0.00620532
lnc-GPRASP2-1	457	0	3	0.001	41.6855	15.3473	Up	0.00108424	0.00580692
lnc-DCDC1-5	1067	0	7	0.001	41.6595	15.3464	Up	5.88e-07	1.14e-05
MYBPHL	1372	0	9	0.001	41.6551	15.3462	Up	1.37e-08	4.11e-07
lnc-SLC14A1-1	610	0	4	0.001	41.64	15.3457	Up	0.000165443	0.00135269
HES7	1682	0	11	0.001	41.5286	15.3418	Up	3.19e-10	1.54e-08
lnc-SMEK1-6	918	0	6	0.001	41.5039	15.341	Up	3.85e-06	5.8e-05
lnc-VRK2-5	765	0	5	0.001	41.5039	15.341	Up	2.52e-05	0.000276884
lnc-GMEB1-2	612	0	4	0.001	41.5039	15.341	Up	0.000165443	0.00128073
lnc-DLGAP5-5	459	0	3	0.001	41.5039	15.341	Up	0.00108424	0.00573314
lnc-SERF1B-4	766	0	5	0.001	41.4497	15.3391	Up	2.52e-05	0.000290034
lnc-CHCHD5-5	613	0	4	0.001	41.4362	15.3386	Up	0.000165443	0.0012209
lnc-TRAT1-12	1686	0	11	0.001	41.43	15.3384	Up	3.19e-10	1.52e-08
lnc-BAGE4-6	460	0	3	0.001	41.4137	15.3378	Up	0.00108424	0.00622557
lnc-KANK4-2	307	0	2	0.001	41.3687	15.3363	Up	0.0071056	0.0262834
lnc-CALM2-6	307	0	2	0.001	41.3687	15.3363	Up	0.0071056	0.0255651
lnc-APOLD1-1	461	0	3	0.001	41.3238	15.3347	Up	0.00108424	0.00573158
lnc-SPAST-2	308	0	2	0.001	41.2344	15.3316	Up	0.0071056	0.0284562
lnc-HMGCS1-2	308	0	2	0.001	41.2344	15.3316	Up	0.0071056	0.0262985
lnc-ZNF639-2	462	0	3	0.001	41.2344	15.3316	Up	0.00108424	0.00577416
lnc-NOP58-4	462	0	3	0.001	41.2344	15.3316	Up	0.00108424	0.0057591
lnc-MYOT-3	771	0	5	0.001	41.1809	15.3297	Up	2.52e-05	0.000261054
lnc-C9orf68-2	617	0	4	0.001	41.1675	15.3292	Up	0.000165443	0.00125414
lnc-WDR69-5	463	0	3	0.001	41.1453	15.3284	Up	0.00108424	0.00574098
lnc-FNDC1-6	834	0	5	0.001	41.1275	15.3278	Up	2.52e-05	0.000267486
lnc-RNF152-9	309	0	2	0.001	41.1009	15.3269	Up	0.0071056	0.0269954
lnc-TSPY2-5	464	0	3	0.001	41.0566	15.3253	Up	0.00108424	0.00634032
lnc-C15orf41-5	464	0	3	0.001	41.0566	15.3253	Up	0.00108424	0.00631551
lnc-CNOT8-4	464	0	3	0.001	41.0566	15.3253	Up	0.00108424	0.00620899
lnc-ZDHHC23-1	619	0	4	0.001	41.0345	15.3246	Up	0.000165443	0.00134052
lnc-RP11-214N1.1.1-8	1548	0	10	0.001	41.0213	15.3241	Up	2.09e-09	7.79e-08
OR5AC2	930	0	6	0.001	40.9683	15.3222	Up	3.85e-06	5.69e-05
lnc-SLC9A11-3	775	0	5	0.001	40.9683	15.3222	Up	2.52e-05	0.00027886
lnc-RPS4XP21-6	465	0	3	0.001	40.9683	15.3222	Up	0.00108424	0.00574177
lnc-DAZAP2-5	310	0	2	0.001	40.9683	15.3222	Up	0.0071056	0.0256941
lnc-RAB2A-6	310	0	2	0.001	40.9683	15.3222	Up	0.0071056	0.0252344
lnc-GBE1-8	776	0	5	0.001	40.9155	15.3204	Up	2.52e-05	0.000273551
lnc-C17orf75-10	621	0	4	0.001	40.9024	15.3199	Up	0.000165443	0.0013366
lnc-DYNC1LI1-1	466	0	3	0.001	40.8804	15.3191	Up	0.00108424	0.00621635
lnc-TOR1AIP2-3	466	0	3	0.001	40.8804	15.3191	Up	0.00108424	0.00574649
lnc-PBX1-3	1864	0	12	0.001	40.8804	15.3191	Up	4.86e-11	2.63e-09
lnc-PTCD2-3	777	0	5	0.001	40.8629	15.3185	Up	2.52e-05	0.000290206
lnc-DCN-1	777	0	5	0.001	40.8629	15.3185	Up	2.52e-05	0.000281187
lnc-C8orf47-2	1555	0	10	0.001	40.8366	15.3176	Up	2.09e-09	8.38e-08
lnc-SLC6A13-1	467	0	3	0.001	40.7929	15.316	Up	0.00108424	0.00613188
lnc-APCDD1L-1	623	0	4	0.001	40.7711	15.3153	Up	0.000165443	0.00137094
lnc-ZNF431-2	478	0	3	0.001	40.7057	15.3129	Up	0.00108424	0.00633745
lnc-PCDH20-22	468	0	3	0.001	40.7057	15.3129	Up	0.00108424	0.00601327
POU5F1P5	937	0	6	0.001	40.6623	15.3114	Up	3.85e-06	5.83e-05
OR6C1	939	0	6	0.001	40.5757	15.3083	Up	3.85e-06	5.92e-05
lnc-GALNT7-1	626	0	4	0.001	40.5757	15.3083	Up	0.000165443	0.00133576
lnc-PCDH19-3	313	0	2	0.001	40.5757	15.3083	Up	0.0071056	0.0252877
lnc-TSPAN4-2	470	0	3	0.001	40.5325	15.3068	Up	0.00108424	0.00571674
lnc-RAB35-2	314	0	2	0.001	40.4465	15.3037	Up	0.0071056	0.0251122
lnc-C7orf65-2	1257	0	8	0.001	40.4143	15.3026	Up	8.97e-08	2.15e-06
lnc-DLK1-1	943	0	6	0.001	40.4036	15.3022	Up	3.85e-06	5.88e-05
lnc-AP3S1-15	944	0	6	0.001	40.3608	15.3007	Up	3.85e-06	5.77e-05
lnc-SORCS3-4	1103	0	7	0.001	40.2998	15.2985	Up	5.88e-07	1.11e-05
lnc-GFOD1-2	473	0	3	0.001	40.2754	15.2976	Up	0.00108424	0.00599694
lnc-LINC00470-2	1105	0	7	0.001	40.2268	15.2959	Up	5.88e-07	1.12e-05
lnc-ARL4D-2	632	0	4	0.001	40.1905	15.2946	Up	0.000165443	0.00125193
lnc-LRRC49-5	474	0	3	0.001	40.1905	15.2946	Up	0.00108424	0.00575121
lnc-FMOD-6	792	0	5	0.001	40.089	15.2909	Up	2.52e-05	0.000289347
BMP10	1584	0	10	0.001	40.089	15.2909	Up	2.09e-09	7.71e-08
lnc-YIPF5-2	317	0	2	0.001	40.0637	15.29	Up	0.0071056	0.0268008
lnc-CTAGE1-2	634	0	4	0.001	40.0637	15.29	Up	0.000165443	0.00126705
lnc-GARS-8	2061	0	13	0.001	40.054	15.2897	Up	7.42e-12	4.93e-10
lnc-PPCDC-1	476	0	3	0.001	40.0216	15.2885	Up	0.00108424	0.0062994
lnc-SMAD5-1	636	0	4	0.001	39.9377	15.2855	Up	0.000165443	0.00129158
lnc-THSD4-6	1590	0	10	0.001	39.9377	15.2855	Up	2.09e-09	7.93e-08
lnc-ZNF254-2	954	0	6	0.001	39.9377	15.2855	Up	3.85e-06	5.34e-05
lnc-FAM71F2-5	1114	0	7	0.001	39.9018	15.2842	Up	5.88e-07	1.15e-05
lnc-UBE2R2-1	478	0	3	0.001	39.8541	15.2824	Up	0.00108424	0.00626367
lnc-RUNX1T1-2	478	0	3	0.001	39.8541	15.2824	Up	0.00108424	0.00586453
lnc-ZMYM1-1	478	0	3	0.001	39.8541	15.2824	Up	0.00108424	0.00573863
HIST1H3J	478	0	3	0.001	39.8541	15.2824	Up	0.00108424	0.00571596
lnc-TP53TG3-2	4147	0	26	0.001	39.8125	15.2809	Up	1.8e-22	3.53e-20
lnc-AP000525.1-6	1915	0	12	0.001	39.7917	15.2802	Up	4.86e-11	2.75e-09
lnc-RAN-6	798	0	5	0.001	39.7876	15.28	Up	2.52e-05	0.00026288
lnc-GTF2A2-4	479	0	3	0.001	39.7709	15.2794	Up	0.00108424	0.00557251
lnc-PRDM9-10	1917	0	12	0.001	39.7502	15.2787	Up	4.86e-11	2.64e-09
lnc-ABR-4	320	0	2	0.001	39.6881	15.2764	Up	0.0071056	0.0276078
lnc-NFASC-4	320	0	2	0.001	39.6881	15.2764	Up	0.0071056	0.0268138
lnc-ZNF727-5	640	0	4	0.001	39.6881	15.2764	Up	0.000165443	0.00123479
lnc-ALB-6	1763	0	11	0.001	39.6205	15.274	Up	3.19e-10	1.48e-08
lnc-ARMC9-1	481	0	3	0.001	39.6056	15.2734	Up	0.00108424	0.00567423
RAET1L	802	0	5	0.001	39.5891	15.2728	Up	2.52e-05	0.000282406
lnc-ITM2A-2	802	0	5	0.001	39.5891	15.2728	Up	2.52e-05	0.000266247
lnc-NOC3L-7	1604	0	10	0.001	39.5891	15.2728	Up	2.09e-09	7.81e-08
lnc-SH3RF2-4	321	0	2	0.001	39.5644	15.2719	Up	0.0071056	0.0276689
lnc-RNF6-2	1124	0	7	0.001	39.5468	15.2713	Up	5.88e-07	1.17e-05
lnc-HSCB-4	1606	0	10	0.001	39.5398	15.271	Up	2.09e-09	8e-08
lnc-AL137145.1-10	1125	0	7	0.001	39.5117	15.27	Up	5.88e-07	1.16e-05
lnc-TRIM24-2	643	0	4	0.001	39.5029	15.2697	Up	0.000165443	0.0013217
lnc-TAS2R1-4	322	0	2	0.001	39.4416	15.2674	Up	0.0071056	0.0266372
lnc-C7orf11-3	1771	0	11	0.001	39.4416	15.2674	Up	3.19e-10	1.49e-08
OR5K3	966	0	6	0.001	39.4416	15.2674	Up	3.85e-06	5.41e-05
lnc-CCL22-1	484	0	3	0.001	39.3601	15.2644	Up	0.00108424	0.00630508
lnc-MS4A5-2	484	0	3	0.001	39.3601	15.2644	Up	0.00108424	0.00588262
lnc-CALM1-4	485	0	3	0.001	39.2789	15.2615	Up	0.00108424	0.00604793
lnc-GJB2-1	485	0	3	0.001	39.2789	15.2615	Up	0.00108424	0.00600724
lnc-NAA35-1	809	0	5	0.001	39.2466	15.2603	Up	2.52e-05	0.000271424
lnc-INTU-2	324	0	2	0.001	39.1981	15.2585	Up	0.0071056	0.0271929
ZNF483	3729	0	23	0.001	39.1666	15.2573	Up	5.08e-20	8.05e-18
POMK	1623	0	10	0.001	39.1257	15.2558	Up	2.09e-09	8.26e-08
lnc-FAM102B-3	812	0	5	0.001	39.1016	15.2549	Up	2.52e-05	0.000284461
lnc-OGFRL1-11	812	0	5	0.001	39.1016	15.2549	Up	2.52e-05	0.000261543
lnc-C17orf51-10	325	0	2	0.001	39.0775	15.2541	Up	0.0071056	0.0283975
lnc-C7orf44-2	325	0	2	0.001	39.0775	15.2541	Up	0.0071056	0.0280871
SMCO4	975	0	6	0.001	39.0775	15.2541	Up	3.85e-06	5.6e-05
lnc-RP11-214N1.1.1-6	325	0	2	0.001	39.0775	15.2541	Up	0.0071056	0.0258802
lnc-UTP18-1	650	0	4	0.001	39.0775	15.2541	Up	0.000165443	0.00123766
GRASP	1953	0	12	0.001	39.0175	15.2518	Up	4.86e-11	2.65e-09
lnc-KCNC2-7	814	0	5	0.001	39.0055	15.2514	Up	2.52e-05	0.000274628
lnc-DOCK2-1	489	0	3	0.001	38.9576	15.2496	Up	0.00108424	0.00610246
lnc-TEX15-4	1630	0	10	0.001	38.9576	15.2496	Up	2.09e-09	8.17e-08
lnc-C22orf46-1	815	0	5	0.001	38.9576	15.2496	Up	2.52e-05	0.000272028
lnc-RP11-778D12.2.1-1	489	0	3	0.001	38.9576	15.2496	Up	0.00108424	0.00578211
lnc-CDYL-13	1142	0	7	0.001	38.9235	15.2484	Up	5.88e-07	1.17e-05
lnc-BAGE4-12	816	0	5	0.001	38.9099	15.2478	Up	2.52e-05	0.000267779
lnc-IMPA1-1	1306	0	8	0.001	38.898	15.2474	Up	8.97e-08	2.16e-06
lnc-BOD1-6	490	0	3	0.001	38.8781	15.2467	Up	0.00108424	0.0059544
lnc-UGP2-4	1471	0	9	0.001	38.8517	15.2457	Up	1.37e-08	4.21e-07
lnc-LILRB3-2	327	0	2	0.001	38.8385	15.2452	Up	0.0071056	0.0259928
lnc-HS3ST3B1-8	655	0	4	0.001	38.7792	15.243	Up	0.000165443	0.00123718
lnc-APOL1-9	492	0	3	0.001	38.7201	15.2408	Up	0.00108424	0.00628713
lnc-NPAS1-5	1148	0	7	0.001	38.7201	15.2408	Up	5.88e-07	1.18e-05
lnc-RP11-351M8.1.1-3	492	0	3	0.001	38.7201	15.2408	Up	0.00108424	0.00599437
lnc-DISP2-1	492	0	3	0.001	38.7201	15.2408	Up	0.00108424	0.00584412
lnc-NDEL1-5	492	0	3	0.001	38.7201	15.2408	Up	0.00108424	0.00577814
lnc-FTMT-2	821	0	5	0.001	38.6729	15.239	Up	2.52e-05	0.000263092
lnc-GSC-2	657	0	4	0.001	38.6611	15.2386	Up	0.000165443	0.00125316
lnc-COPS7A-3	657	0	4	0.001	38.6611	15.2386	Up	0.000165443	0.00120778
lnc-ELSPBP1-2	493	0	3	0.001	38.6415	15.2379	Up	0.00108424	0.00598326
PCDHGB8P	1973	0	12	0.001	38.622	15.2371	Up	4.86e-11	2.64e-09
lnc-ARHGAP28-2	658	0	4	0.001	38.6024	15.2364	Up	0.000165443	0.00120369
lnc-RAB11A-3	494	0	3	0.001	38.5633	15.2349	Up	0.00108424	0.0061634
lnc-C9orf57-1	495	0	3	0.001	38.4854	15.232	Up	0.00108424	0.00602535
lnc-TPH1-1	660	0	4	0.001	38.4854	15.232	Up	0.000165443	0.00129419
lnc-TMEM161B-1	495	0	3	0.001	38.4854	15.232	Up	0.00108424	0.00554967
lnc-NECAB1-2	3471	0	21	0.001	38.4189	15.2295	Up	2.18e-18	3.13e-16
lnc-NINJ2-1	496	0	3	0.001	38.4078	15.2291	Up	0.00108424	0.00570586
lnc-USP13-1	827	0	5	0.001	38.3923	15.2285	Up	2.52e-05	0.000279738
lnc-SERPINA12-1	994	0	6	0.001	38.3305	15.2262	Up	3.85e-06	5.85e-05
lnc-FUBP1-2	2156	0	13	0.001	38.2891	15.2246	Up	7.42e-12	4.92e-10
lnc-RP11-93B14.6.1-3	332	0	2	0.001	38.2536	15.2233	Up	0.0071056	0.0270246
lnc-RIMBP2-8	498	0	3	0.001	38.2536	15.2233	Up	0.00108424	0.00576781
lnc-C10orf136-4	498	0	3	0.001	38.2536	15.2233	Up	0.00108424	0.00559555
lnc-RP11-382B18.2.1-3	499	0	3	0.001	38.1769	15.2204	Up	0.00108424	0.00605491
lnc-SDF2-1	499	0	3	0.001	38.1769	15.2204	Up	0.00108424	0.00564522
TMSB15A	666	0	4	0.001	38.1387	15.219	Up	0.000165443	0.00126329
lnc-PPP1R3D-10	500	0	3	0.001	38.1006	15.2175	Up	0.00108424	0.0062441
lnc-GCM1-1	500	0	3	0.001	38.1006	15.2175	Up	0.00108424	0.00607419
lnc-OR5C1-1	1001	0	6	0.001	38.0625	15.2161	Up	3.85e-06	5.71e-05
lnc-NR2F2-2	501	0	3	0.001	38.0245	15.2146	Up	0.00108424	0.00584737
lnc-PHF14-8	669	0	4	0.001	37.9677	15.2125	Up	0.000165443	0.00121442
lnc-RP11-15G16.1.1-3	502	0	3	0.001	37.9488	15.2118	Up	0.00108424	0.006348
lnc-RP11-276H1.3.1-1	502	0	3	0.001	37.9488	15.2118	Up	0.00108424	0.00586371
lnc-TMEM30B-3	502	0	3	0.001	37.9488	15.2118	Up	0.00108424	0.0056681
lnc-PIGF-3	837	0	5	0.001	37.9337	15.2112	Up	2.52e-05	0.000271348
lnc-RP3-324N14.2.1-3	335	0	2	0.001	37.911	15.2103	Up	0.0071056	0.0278483
lnc-OBFC2A-15	335	0	2	0.001	37.911	15.2103	Up	0.0071056	0.0262357
lnc-C10orf31-9	335	0	2	0.001	37.911	15.2103	Up	0.0071056	0.0255461
lnc-CLEC7A-1	1006	0	6	0.001	37.8733	15.2089	Up	3.85e-06	5.31e-05
lnc-JMJD4-3	671	0	4	0.001	37.8545	15.2082	Up	0.000165443	0.00135384
lnc-TTLL7-6	671	0	4	0.001	37.8545	15.2082	Up	0.000165443	0.00123862
lnc-ADHFE1-2	839	0	5	0.001	37.8432	15.2077	Up	2.52e-05	0.000266102
TRIM51HP	1007	0	6	0.001	37.8357	15.2075	Up	3.85e-06	5.8e-05
lnc-GOLGA8F-3	336	0	2	0.001	37.7982	15.206	Up	0.0071056	0.0282545
OR9K2	1008	0	6	0.001	37.7982	15.206	Up	3.85e-06	5.84e-05
C10orf131	1176	0	7	0.001	37.7982	15.206	Up	5.88e-07	1.17e-05
lnc-FAM84B-10	504	0	3	0.001	37.7982	15.206	Up	0.00108424	0.00570974
lnc-MBNL2-4	841	0	5	0.001	37.7532	15.2043	Up	2.52e-05	0.000291592
lnc-ORMDL1-4	505	0	3	0.001	37.7233	15.2032	Up	0.00108424	0.00576702
lnc-SMAD4-4	1347	0	8	0.001	37.714	15.2028	Up	8.97e-08	2.33e-06
lnc-FOSL2-7	674	0	4	0.001	37.686	15.2017	Up	0.000165443	0.00131654
lnc-GJE1-6	337	0	2	0.001	37.686	15.2017	Up	0.0071056	0.026645
lnc-ARRDC3-10	843	0	5	0.001	37.6637	15.2009	Up	2.52e-05	0.00026881
lnc-MYO6-1	2361	0	14	0.001	37.6541	15.2005	Up	1.13e-12	8.91e-11
lnc-EHD3-8	1181	0	7	0.001	37.6381	15.1999	Up	5.88e-07	1.09e-05
lnc-ADAR-3	523	0	4	0.001	37.6302	15.1996	Up	0.000165443	0.00123171
lnc-COX15-2	846	0	5	0.001	37.5301	15.1958	Up	2.52e-05	0.000276963
lnc-OSTF1-3	339	0	2	0.001	37.4637	15.1932	Up	0.0071056	0.0270352
lnc-MAGEA12-1	848	0	5	0.001	37.4416	15.1924	Up	2.52e-05	0.000283143
lnc-TSN-9	1018	0	6	0.001	37.4269	15.1918	Up	3.85e-06	5.82e-05
lnc-C6orf141-2	1018	0	6	0.001	37.4269	15.1918	Up	3.85e-06	5.54e-05
lnc-TTC19-1	340	0	2	0.001	37.3535	15.189	Up	0.0071056	0.0265986
lnc-MFSD9-18	680	0	4	0.001	37.3535	15.189	Up	0.000165443	0.0012473
lnc-AMY1B-3	680	0	4	0.001	37.3535	15.189	Up	0.000165443	0.00122254
lnc-NPVF-5	1870	0	11	0.001	37.3535	15.189	Up	3.19e-10	1.45e-08
lnc-ZFYVE1-5	511	0	3	0.001	37.2804	15.1861	Up	0.00108424	0.00604532
lnc-C5orf27-1	1704	0	10	0.001	37.2658	15.1856	Up	2.09e-09	8.01e-08
lnc-ACP1-11	845	0	5	0.001	37.2658	15.1856	Up	2.52e-05	0.000255926
lnc-FAM46C-5	2386	0	14	0.001	37.2596	15.1853	Up	1.13e-12	8.59e-11
lnc-UPF1-2	683	0	4	0.001	37.1894	15.1826	Up	0.000165443	0.00136132
lnc-XPNPEP1-2	342	0	2	0.001	37.135	15.1805	Up	0.0071056	0.0262508
lnc-DZIP1-5	513	0	3	0.001	37.135	15.1805	Up	0.00108424	0.00557918
lnc-NDNF-4	685	0	4	0.001	37.0808	15.1784	Up	0.000165443	0.00129918
lnc-MPDZ-4	1199	0	7	0.001	37.0731	15.1781	Up	5.88e-07	1.11e-05
lnc-METTL22-2	1028	0	6	0.001	37.0628	15.1777	Up	3.85e-06	5.84e-05
lnc-NDFIP2-22	514	0	3	0.001	37.0628	15.1777	Up	0.00108424	0.00573549
PDCL	3085	0	18	0.001	37.0508	15.1772	Up	6.14e-16	7.31e-14
lnc-TARBP2-1	343	0	2	0.001	37.0268	15.1763	Up	0.0071056	0.026364
lnc-GPR85-1	2058	0	12	0.001	37.0268	15.1763	Up	4.86e-11	2.67e-09
CLLU1OS	686	0	4	0.001	37.0268	15.1763	Up	0.000165443	0.00121304
lnc-ASAP2-6	1201	0	7	0.001	37.0114	15.1757	Up	5.88e-07	1.12e-05
lnc-TECRL-10	515	0	3	0.001	36.9908	15.1749	Up	0.00108424	0.00594596
lnc-FAS-3	859	0	5	0.001	36.9621	15.1738	Up	2.52e-05	0.000278066
lnc-LRTM2-5	688	0	4	0.001	36.9191	15.1721	Up	0.000165443	0.00131168
lnc-EGR2-1	688	0	4	0.001	36.9191	15.1721	Up	0.000165443	0.00125957
SUMO4	688	0	4	0.001	36.9191	15.1721	Up	0.000165443	0.00123218
lnc-ZSWIM2-5	689	0	4	0.001	36.8656	15.17	Up	0.000165443	0.00122793
lnc-SMO-2	1034	0	6	0.001	36.8477	15.1693	Up	3.85e-06	5.87e-05
lnc-OTUD7B-1	345	0	2	0.001	36.8121	15.1679	Up	0.0071056	0.026136
lnc-DNAJC15-5	1035	0	6	0.001	36.8121	15.1679	Up	3.85e-06	5.35e-05
lnc-GK-7	518	0	3	0.001	36.7766	15.1665	Up	0.00108424	0.00577336
lnc-PTPN14-1	518	0	3	0.001	36.7766	15.1665	Up	0.00108424	0.00574885
lnc-SYCE1-1	691	0	4	0.001	36.7589	15.1658	Up	0.000165443	0.00136597
lnc-RP11-366K18.3.1-2	865	0	5	0.001	36.7057	15.1637	Up	2.52e-05	0.00028596
lnc-ERMN-3	693	0	4	0.001	36.6528	15.1616	Up	0.000165443	0.00127843
lnc-LYZL2-6	520	0	3	0.001	36.6352	15.1609	Up	0.00108424	0.00561276
lnc-VWC2-4	520	0	3	0.001	36.6352	15.1609	Up	0.00108424	0.00558066
lnc-CTR9-7	1387	0	8	0.001	36.6263	15.1606	Up	8.97e-08	2.18e-06
lnc-PRRG4-4	347	0	2	0.001	36.6	15.1596	Up	0.0071056	0.0257832
lnc-RP11-62N21.1.1-1	347	0	2	0.001	36.6	15.1596	Up	0.0071056	0.0256175
lnc-MCART1-3	868	0	5	0.001	36.5789	15.1587	Up	2.52e-05	0.000276649
lnc-EPSTI1-8	521	0	3	0.001	36.5648	15.1582	Up	0.00108424	0.00621083
lnc-JAM3-7	521	0	3	0.001	36.5648	15.1582	Up	0.00108424	0.0057869
PRSS35	2606	0	15	0.001	36.5508	15.1576	Up	1.73e-13	1.51e-11
lnc-LYPD6-1	869	0	5	0.001	36.5368	15.1571	Up	2.52e-05	0.000290379
ZNF534	2086	0	12	0.001	36.5298	15.1568	Up	4.86e-11	2.64e-09
PPP1R2P9	870	0	5	0.001	36.4948	15.1554	Up	2.52e-05	0.000267926
lnc-COG3-4	696	0	4	0.001	36.4948	15.1554	Up	0.000165443	0.00121835
LOC103908605	522	0	3	0.001	36.4948	15.1554	Up	0.00108424	0.0055666
CDKL4	1567	0	9	0.001	36.4715	15.1545	Up	1.37e-08	4.29e-07
lnc-SLC16A14-4	873	0	5	0.001	36.3694	15.1504	Up	2.52e-05	0.000272256
lnc-AC008132.13.1-3	524	0	3	0.001	36.3555	15.1499	Up	0.00108424	0.00569811
lnc-FAM72B-4	699	0	4	0.001	36.3382	15.1492	Up	0.000165443	0.00124078
lnc-MUC13-5	1224	0	7	0.001	36.3159	15.1483	Up	5.88e-07	1.09e-05
lnc-NRIP3-4	525	0	3	0.001	36.2862	15.1471	Up	0.00108424	0.00581738
lnc-HMGB1-2	876	0	5	0.001	36.2448	15.1455	Up	2.52e-05	0.000282488
lnc-DLL1-5	701	0	4	0.001	36.2345	15.1451	Up	0.000165443	0.00136161
lnc-DSE-1	701	0	4	0.001	36.2345	15.1451	Up	0.000165443	0.00120324
lnc-ZDHHC15-3	1228	0	7	0.001	36.1976	15.1436	Up	5.88e-07	1.16e-05
lnc-ATP6V0A4-1	527	0	3	0.001	36.1485	15.1416	Up	0.00108424	0.0060698
lnc-CXorf36-6	528	0	3	0.001	36.0801	15.1389	Up	0.00108424	0.00637306
lnc-MAP3K9-9	352	0	2	0.001	36.0801	15.1389	Up	0.0071056	0.0274837
lnc-TMEM185B-2	690	0	3	0.001	36.0801	15.1389	Up	0.00108424	0.0059637
lnc-COQ7-1	704	0	4	0.001	36.0801	15.1389	Up	0.000165443	0.00125636
lnc-IFNA8-3	528	0	3	0.001	36.0801	15.1389	Up	0.00108424	0.00556291
GXYLT1P3	2291	0	13	0.001	36.0328	15.137	Up	7.42e-12	5e-10
lnc-CTD-2547L24.3.1-1	705	0	4	0.001	36.0289	15.1369	Up	0.000165443	0.00132143
lnc-ATG4A-3	1940	0	11	0.001	36.0057	15.1359	Up	3.19e-10	1.55e-08
lnc-ZC3H12D-19	1059	0	6	0.001	35.9779	15.1348	Up	3.85e-06	5.71e-05
lnc-SBF2-6	353	0	2	0.001	35.9779	15.1348	Up	0.0071056	0.0267564
lnc-PCDH10-11	1236	0	7	0.001	35.9633	15.1342	Up	5.88e-07	1.13e-05
SERPINA2	1060	0	6	0.001	35.9439	15.1335	Up	3.85e-06	5.47e-05
lnc-PABPC1-1	354	0	2	0.001	35.8762	15.1307	Up	0.0071056	0.0280442
lnc-C16orf54-1	354	0	2	0.001	35.8762	15.1307	Up	0.0071056	0.0262533
lnc-ANKRD27-4	354	0	2	0.001	35.8762	15.1307	Up	0.0071056	0.0262332
NTS	1239	0	7	0.001	35.8762	15.1307	Up	5.88e-07	1.1e-05
lnc-GCNT7-1	532	0	3	0.001	35.8088	15.128	Up	0.00108424	0.00592497
lnc-LAMA1-3	533	0	3	0.001	35.7416	15.1253	Up	0.00108424	0.00612026
lnc-SOCS2-5	533	0	3	0.001	35.7416	15.1253	Up	0.00108424	0.00574727
lnc-GAPT-2	711	0	4	0.001	35.7249	15.1246	Up	0.000165443	0.00135728
lnc-RBMX-5	356	0	2	0.001	35.6747	15.1226	Up	0.0071056	0.0270432
lnc-GPER-6	534	0	3	0.001	35.6747	15.1226	Up	0.00108424	0.00569889
FAM229B	2671	0	15	0.001	35.6613	15.1221	Up	1.73e-13	1.51e-11
HOXC10	1959	0	11	0.001	35.6565	15.1219	Up	3.19e-10	1.48e-08
lnc-ATG2B-1	714	0	4	0.001	35.5748	15.1186	Up	0.000165443	0.00126305
lnc-RAB33A-1	357	0	2	0.001	35.5748	15.1186	Up	0.0071056	0.0259731
lnc-MRPL39-23	1428	0	8	0.001	35.5748	15.1186	Up	8.97e-08	2.17e-06
lnc-HEXB-1	1608	0	9	0.001	35.5416	15.1172	Up	1.37e-08	4.15e-07
lnc-CTC-236F12.4.1-4	536	0	3	0.001	35.5416	15.1172	Up	0.00108424	0.00570043
lnc-SRPK2-8	715	0	4	0.001	35.525	15.1165	Up	0.000165443	0.00132883
lnc-CDH5-20	2147	0	12	0.001	35.4919	15.1152	Up	4.86e-11	2.72e-09
lnc-RPS6KB1-2	538	0	3	0.001	35.4094	15.1118	Up	0.00108424	0.00615707
lnc-CDH6-16	718	0	4	0.001	35.3766	15.1105	Up	0.000165443	0.001347
lnc-ECHDC3-6	2874	0	16	0.001	35.3519	15.1095	Up	2.64e-14	2.6e-12
lnc-RP11-82I10.1.1-13	1258	0	7	0.001	35.3344	15.1088	Up	5.88e-07	1.13e-05
lnc-SLK-1	360	0	2	0.001	35.2783	15.1065	Up	0.0071056	0.0279331
lnc-VPREB1-19	360	0	2	0.001	35.2783	15.1065	Up	0.0071056	0.0262733
lnc-ARPP19-1	540	0	3	0.001	35.2783	15.1065	Up	0.00108424	0.00581496
lnc-SECISBP2L-1	360	0	2	0.001	35.2783	15.1065	Up	0.0071056	0.02552
lnc-UBASH3B-6	541	0	3	0.001	35.2131	15.1038	Up	0.00108424	0.00579969
TNFRSF11B	2346	0	13	0.001	35.1881	15.1028	Up	7.42e-12	4.98e-10
lnc-AKIP1-5	361	0	2	0.001	35.1806	15.1025	Up	0.0071056	0.0251766
lnc-C6orf164-1	542	0	3	0.001	35.1481	15.1012	Up	0.00108424	0.00612919
lnc-CREG2-1	542	0	3	0.001	35.1481	15.1012	Up	0.00108424	0.00574964
CNEP1R1	2169	0	12	0.001	35.1319	15.1005	Up	4.86e-11	2.65e-09
lnc-DSCR4-15	1448	0	8	0.001	35.0834	15.0985	Up	8.97e-08	2.34e-06
lnc-NUBP1-2	543	0	3	0.001	35.0834	15.0985	Up	0.00108424	0.00592247
lnc-FIG4-1	906	0	5	0.001	35.0447	15.0969	Up	2.52e-05	0.000274242
lnc-CCDC14-1	544	0	3	0.001	35.0189	15.0958	Up	0.00108424	0.00616702
lnc-LIN7A-4	544	0	3	0.001	35.0189	15.0958	Up	0.00108424	0.00609183
MTHFD2L	2359	0	13	0.001	34.9942	15.0948	Up	7.42e-12	5.02e-10
lnc-KIAA0564-1	363	0	2	0.001	34.9867	15.0945	Up	0.0071056	0.0262383
lnc-LDOC1-1	363	0	2	0.001	34.9867	15.0945	Up	0.0071056	0.0255271
lnc-SLC9B1-1	727	0	4	0.001	34.9386	15.0925	Up	0.000165443	0.00127919
lnc-SH3BP2-1	727	0	4	0.001	34.9386	15.0925	Up	0.000165443	0.00123242
lnc-EPM2AIP1-7	546	0	3	0.001	34.8906	15.0906	Up	0.00108424	0.00630413
lnc-RPL21-4	910	0	5	0.001	34.8906	15.0906	Up	2.52e-05	0.000264588
lnc-KIAA1755-13	911	0	5	0.001	34.8523	15.089	Up	2.52e-05	0.000285876
lnc-SLC1A1-11	729	0	4	0.001	34.8428	15.0886	Up	0.000165443	0.00134785
lnc-JAG1-9	729	0	4	0.001	34.8428	15.0886	Up	0.000165443	0.00125586
lnc-PIGC-2	411	0	3	0.001	34.8268	15.0879	Up	0.00108424	0.00621267
lnc-CRHR2-1	547	0	3	0.001	34.8268	15.0879	Up	0.00108424	0.00587521
lnc-BAG2-9	365	0	2	0.001	34.795	15.0866	Up	0.0071056	0.028625
lnc-BBS5-4	365	0	2	0.001	34.795	15.0866	Up	0.0071056	0.0268086
LOC440461	1643	0	9	0.001	34.7844	15.0862	Up	1.37e-08	4.14e-07
lnc-CTD-2144E22.5.1-24	913	0	5	0.001	34.776	15.0858	Up	2.52e-05	0.000262668
lnc-ARL5B-2	548	0	3	0.001	34.7633	15.0853	Up	0.00108424	0.0062796
lnc-DHX15-4	548	0	3	0.001	34.7633	15.0853	Up	0.00108424	0.00574491
lnc-MAGEE2-1	1096	0	6	0.001	34.7633	15.0853	Up	3.85e-06	5.31e-05
lnc-AC109486.1-4	1463	0	8	0.001	34.7237	15.0836	Up	8.97e-08	2.32e-06
lnc-NKAIN3-13	366	0	2	0.001	34.7	15.0826	Up	0.0071056	0.0264477
lnc-VDAC2-2	916	0	5	0.001	34.6621	15.0811	Up	2.52e-05	0.000257274
lnc-PLEC-3	550	0	3	0.001	34.6369	15.08	Up	0.00108424	0.0059233
lnc-INSM1-7	367	0	2	0.001	34.6054	15.0787	Up	0.0071056	0.0282865
lnc-RPE-9	1285	0	7	0.001	34.5919	15.0781	Up	5.88e-07	1.14e-05
HOXA10	2571	0	14	0.001	34.5785	15.0776	Up	1.13e-12	8.58e-11
lnc-WNT5B-6	2023	0	11	0.001	34.5284	15.0755	Up	3.19e-10	1.54e-08
lnc-HAND2-1	2209	0	12	0.001	34.4958	15.0741	Up	4.86e-11	2.72e-09
lnc-OTX2-1	621	0	4	0.001	34.4646	15.0728	Up	0.000165443	0.00128639
lnc-KATNAL2-11	737	0	4	0.001	34.4646	15.0728	Up	0.000165443	0.00123384
lnc-FAM98B-3	553	0	3	0.001	34.449	15.0722	Up	0.00108424	0.00627022
lnc-WDR75-2	553	0	3	0.001	34.449	15.0722	Up	0.00108424	0.00569502
CCND2-AS1	553	0	3	0.001	34.449	15.0722	Up	0.00108424	0.00556438
lnc-CSMD1-6	923	0	5	0.001	34.3992	15.0701	Up	2.52e-05	0.000275169
lnc-LRRC70-3	923	0	5	0.001	34.3992	15.0701	Up	2.52e-05	0.000270747
lnc-RGPD3-1	554	0	3	0.001	34.3868	15.0696	Up	0.00108424	0.00628996
lnc-PDE4DIP-6	554	0	3	0.001	34.3868	15.0696	Up	0.00108424	0.00595524
lnc-ZNF783-2	2216	0	12	0.001	34.3868	15.0696	Up	4.86e-11	2.65e-09
lnc-EEA1-6	1293	0	7	0.001	34.3779	15.0692	Up	5.88e-07	1.09e-05
lnc-OR4C12-7	739	0	4	0.001	34.3713	15.0689	Up	0.000165443	0.00134192
lnc-IDH1-2	739	0	4	0.001	34.3713	15.0689	Up	0.000165443	0.00132498
lnc-IFT81-2	739	0	4	0.001	34.3713	15.0689	Up	0.000165443	0.00127082
lnc-AC053481.1-2	370	0	2	0.001	34.3248	15.067	Up	0.0071056	0.0277219
lnc-SNPH-2	1110	0	6	0.001	34.3248	15.067	Up	3.85e-06	5.59e-05
lnc-GPR149-11	2224	0	12	0.001	34.2631	15.0644	Up	4.86e-11	2.77e-09
lnc-TNP1-7	371	0	2	0.001	34.2323	15.0631	Up	0.0071056	0.0268505
lnc-CCDC90B-3	2041	0	11	0.001	34.2239	15.0627	Up	3.19e-10	1.48e-08
lnc-ALDH8A1-3	929	0	5	0.001	34.177	15.0607	Up	2.52e-05	0.000276258
lnc-ZNF485-6	3532	0	19	0.001	34.1596	15.06	Up	9.36e-17	1.18e-14
lnc-VNN2-2	558	0	3	0.001	34.1403	15.0592	Up	0.00108424	0.00609448
lnc-CH25H-1	1116	0	6	0.001	34.1403	15.0592	Up	3.85e-06	5.33e-05
lnc-BTN3A2-3	931	0	5	0.001	34.1036	15.0576	Up	2.52e-05	0.000286884
lnc-TPTE-4	745	0	4	0.001	34.0945	15.0572	Up	0.000165443	0.00125932
lnc-NTS-2	745	0	4	0.001	34.0945	15.0572	Up	0.000165443	0.00123147
LOC100129603	559	0	3	0.001	34.0792	15.0566	Up	0.00108424	0.00584982
lnc-MYOM2-3	559	0	3	0.001	34.0792	15.0566	Up	0.00108424	0.0056331
LOC728024	1491	0	8	0.001	34.0716	15.0563	Up	8.97e-08	2.31e-06
lnc-NQO2-4	932	0	5	0.001	34.067	15.0561	Up	2.52e-05	0.000280622
OR4C16	933	0	5	0.001	34.0305	15.0545	Up	2.52e-05	0.000281349
lnc-KCNA1-2	560	0	3	0.001	34.0184	15.054	Up	0.00108424	0.00582142
lnc-ZFP90-1	374	0	2	0.001	33.9577	15.0515	Up	0.0071056	0.0262483
OR8H1	936	0	5	0.001	33.9214	15.0499	Up	2.52e-05	0.000282569
lnc-SHROOM4-4	936	0	5	0.001	33.9214	15.0499	Up	2.52e-05	0.000256194
lnc-TMEM66-2	749	0	4	0.001	33.9124	15.0495	Up	0.000165443	0.00121327
lnc-LARS-1	582	0	2	0.001	33.8672	15.0476	Up	0.0071056	0.0276356
lnc-RPSAP58-4	1500	0	8	0.001	33.8672	15.0476	Up	8.97e-08	2.27e-06
TSACC	750	0	4	0.001	33.8672	15.0476	Up	0.000165443	0.00120437
lnc-C8orf85-2	563	0	3	0.001	33.8371	15.0463	Up	0.00108424	0.00602622
lnc-SLC22A23-3	1126	0	6	0.001	33.8371	15.0463	Up	3.85e-06	5.61e-05
OR51A7	939	0	5	0.001	33.8131	15.0453	Up	2.52e-05	0.000275247
OR52E4	939	0	5	0.001	33.8131	15.0453	Up	2.52e-05	0.000256868
lnc-ITGBL1-4	1128	0	6	0.001	33.7771	15.0438	Up	3.85e-06	5.83e-05
SLC51B	940	0	5	0.001	33.7771	15.0438	Up	2.52e-05	0.00026822
ARMC10	2634	0	14	0.001	33.7514	15.0427	Up	1.13e-12	8.56e-11
lnc-FOXA1-4	2071	0	11	0.001	33.7282	15.0417	Up	3.19e-10	1.47e-08
lnc-TM4SF1-2	377	0	2	0.001	33.6875	15.0399	Up	0.0071056	0.0268951
lnc-SLC24A2-3	754	0	4	0.001	33.6875	15.0399	Up	0.000165443	0.00122934
lnc-AKAP3-1	1509	0	8	0.001	33.6652	15.039	Up	8.97e-08	2.24e-06
lnc-ZNF175-4	566	0	3	0.001	33.6577	15.0387	Up	0.00108424	0.00559033
lnc-PRAMEF11-2	378	0	2	0.001	33.5984	15.0361	Up	0.0071056	0.0283419
lnc-COL25A1-3	1134	0	6	0.001	33.5984	15.0361	Up	3.85e-06	5.65e-05
lnc-AC079341.1-1	568	0	3	0.001	33.5392	15.0336	Up	0.00108424	0.0061158
lnc-ICA1-1	568	0	3	0.001	33.5392	15.0336	Up	0.00108424	0.00567269
lnc-HNRNPU-6	379	0	2	0.001	33.5097	15.0323	Up	0.0071056	0.0284004
lnc-OTOL1-9	758	0	4	0.001	33.5097	15.0323	Up	0.000165443	0.00122887
lnc-ORMDL1-1	4740	0	25	0.001	33.4921	15.0315	Up	1.18e-21	2.18e-19
lnc-C7orf71-5	1707	0	9	0.001	33.4803	15.031	Up	1.37e-08	4.16e-07
lnc-ALDH8A1-2	1520	0	8	0.001	33.4215	15.0285	Up	8.97e-08	2.24e-06
lnc-MRGPRE-1	583	0	3	0.001	33.4215	15.0285	Up	0.00108424	0.00588014
lnc-SCAPER-2	380	0	2	0.001	33.4215	15.0285	Up	0.0071056	0.0262683
PDZD9	1331	0	7	0.001	33.3964	15.0274	Up	5.88e-07	1.12e-05
lnc-TBC1D2B-1	571	0	3	0.001	33.363	15.026	Up	0.00108424	0.00577575
ZNF684	2097	0	11	0.001	33.31	15.0237	Up	3.19e-10	1.51e-08
lnc-SWAP70-3	572	0	3	0.001	33.3047	15.0234	Up	0.00108424	0.00638372
lnc-CETN3-2	572	0	3	0.001	33.3047	15.0234	Up	0.00108424	0.00622188
lnc-RP11-32K4.2.1-2	954	0	5	0.001	33.2814	15.0224	Up	2.52e-05	0.000288834
lnc-SAG-9	573	0	3	0.001	33.2466	15.0209	Up	0.00108424	0.00592665
lnc-SLC7A2-1	2101	0	11	0.001	33.2466	15.0209	Up	3.19e-10	1.46e-08
lnc-ELOVL3-2	382	0	2	0.001	33.2466	15.0209	Up	0.0071056	0.0253998
lnc-SLC46A3-2	575	0	3	0.001	33.1309	15.0159	Up	0.00108424	0.00595863
lnc-RIOK1-1	575	0	3	0.001	33.1309	15.0159	Up	0.00108424	0.00584086
lnc-NDFIP2-14	767	0	4	0.001	33.1165	15.0153	Up	0.000165443	0.00132334
lnc-WDR12-1	767	0	4	0.001	33.1165	15.0153	Up	0.000165443	0.00123527
lnc-PHF14-3	767	0	4	0.001	33.1165	15.0153	Up	0.000165443	0.00120823
lnc-NOC3L-2	384	0	2	0.001	33.0734	15.0134	Up	0.0071056	0.0253437
lnc-CXorf69-1	961	0	5	0.001	33.039	15.0119	Up	2.52e-05	0.000260915
lnc-TACC3-2	1346	0	7	0.001	33.0243	15.0112	Up	5.88e-07	1.17e-05
STX19	1156	0	6	0.001	32.959	15.0084	Up	3.85e-06	5.52e-05
lnc-S1PR1-3	771	0	4	0.001	32.9447	15.0078	Up	0.000165443	0.00131303
SIVA1	771	0	4	0.001	32.9447	15.0078	Up	0.000165443	0.0012882
lnc-COL1A2-1	771	0	4	0.001	32.9447	15.0078	Up	0.000165443	0.0012379
lnc-MATN2-2	771	0	4	0.001	32.9447	15.0078	Up	0.000165443	0.0012284
lnc-SEC22A-1	579	0	3	0.001	32.902	15.0059	Up	0.00108424	0.00637984
lnc-KLHL35-1	386	0	2	0.001	32.902	15.0059	Up	0.0071056	0.0257301
lnc-NXN-3	579	0	3	0.001	32.902	15.0059	Up	0.00108424	0.00566351
lnc-C4orf21-9	1352	0	7	0.001	32.8777	15.0048	Up	5.88e-07	1.14e-05
SEMA6A-AS1	967	0	5	0.001	32.834	15.0029	Up	2.52e-05	0.000256329
lnc-C10orf105-5	387	0	2	0.001	32.817	15.0022	Up	0.0071056	0.0279786
lnc-EPHA6-6	387	0	2	0.001	32.817	15.0022	Up	0.0071056	0.0251905
lnc-LIMK1-1	582	0	3	0.001	32.7324	14.9984	Up	0.00108424	0.00597815
ISOC1	1940	0	10	0.001	32.7324	14.9984	Up	2.09e-09	7.91e-08
lnc-NFASC-5	582	0	3	0.001	32.7324	14.9984	Up	0.00108424	0.00564295
lnc-ADAM22-2	777	0	4	0.001	32.6903	14.9966	Up	0.000165443	0.00132389
lnc-BOLL-6	2528	0	13	0.001	32.6548	14.995	Up	7.42e-12	4.89e-10
lnc-RHBDD1-3	584	0	3	0.001	32.6203	14.9935	Up	0.00108424	0.00610334
lnc-HIATL1-6	779	0	4	0.001	32.6064	14.9929	Up	0.000165443	0.00127766
lnc-GEMIN4-1	1755	0	9	0.001	32.5646	14.991	Up	1.37e-08	4.34e-07
lnc-CYP7A1-4	780	0	4	0.001	32.5646	14.991	Up	0.000165443	0.00132197
lnc-FGF21-2	585	0	3	0.001	32.5646	14.991	Up	0.00108424	0.00583518
lnc-ACSM4-3	1950	0	10	0.001	32.5646	14.991	Up	2.09e-09	7.82e-08
lnc-FREM3-7	585	0	3	0.001	32.5646	14.991	Up	0.00108424	0.00556882
lnc-TPGS2-8	586	0	3	0.001	32.509	14.9886	Up	0.00108424	0.00611669
lnc-RPAP2-2	586	0	3	0.001	32.509	14.9886	Up	0.00108424	0.00589088
THUMPD2	2345	0	12	0.001	32.4951	14.9879	Up	4.86e-11	2.77e-09
lnc-C3orf77-2	1368	0	7	0.001	32.4932	14.9878	Up	5.88e-07	1.12e-05
lnc-PPP6R1-1	391	0	2	0.001	32.4813	14.9873	Up	0.0071056	0.0279615
lnc-SGCG-8	391	0	2	0.001	32.4813	14.9873	Up	0.0071056	0.0259633
OR6Y1	978	0	5	0.001	32.4647	14.9866	Up	2.52e-05	0.00026661
lnc-RASSF2-2	1175	0	6	0.001	32.426	14.9849	Up	3.85e-06	5.8e-05
lnc-GATAD1-6	588	0	3	0.001	32.3984	14.9836	Up	0.00108424	0.00609006
lnc-SNAI3-1	588	0	3	0.001	32.3984	14.9836	Up	0.00108424	0.00583355
lnc-CECR2-2	588	0	3	0.001	32.3984	14.9836	Up	0.00108424	0.00570896
lnc-AC069257.9.1-2	982	0	5	0.001	32.3325	14.9807	Up	2.52e-05	0.00026712
lnc-NUDCD2-5	909	0	5	0.001	32.3325	14.9807	Up	2.52e-05	0.000264088
lnc-DCUN1D1-9	1768	0	9	0.001	32.3251	14.9804	Up	1.37e-08	4.35e-07
lnc-SLC6A4-3	591	0	3	0.001	32.234	14.9763	Up	0.00108424	0.00562706
lnc-SF3B2-2	1380	0	7	0.001	32.2106	14.9752	Up	5.88e-07	1.12e-05
lnc-PSMG4-5	592	0	3	0.001	32.1795	14.9739	Up	0.00108424	0.00633076
lnc-BNIP1-6	1776	0	9	0.001	32.1795	14.9739	Up	1.37e-08	4.36e-07
ANKRD1	1974	0	10	0.001	32.1687	14.9734	Up	2.09e-09	7.87e-08
lnc-JUN-1	395	0	2	0.001	32.1524	14.9726	Up	0.0071056	0.0260223
lnc-RP11-35N6.1.1-2	1580	0	8	0.001	32.1524	14.9726	Up	8.97e-08	2.17e-06
lnc-MOCS2-2	593	0	3	0.001	32.1253	14.9714	Up	0.00108424	0.00556808
lnc-IKZF1-8	1187	0	6	0.001	32.0982	14.9702	Up	3.85e-06	5.46e-05
lnc-VPS52-2	594	0	3	0.001	32.0712	14.969	Up	0.00108424	0.00632503
lnc-LPIN3-2	594	0	3	0.001	32.0712	14.969	Up	0.00108424	0.00569425
lnc-KRTAP4-9-1	396	0	2	0.001	32.0712	14.969	Up	0.0071056	0.0255889
lnc-THUMPD3-13	1188	0	6	0.001	32.0712	14.969	Up	3.85e-06	5.32e-05
lnc-ANGPTL4-3	594	0	3	0.001	32.0712	14.969	Up	0.00108424	0.00560227
lnc-TMEM114-6	595	0	3	0.001	32.0173	14.9666	Up	0.00108424	0.00618338
lnc-IGFBP7-11	794	0	4	0.001	31.9904	14.9654	Up	0.000165443	0.00132553
lnc-DLEU7-1	794	0	4	0.001	31.9904	14.9654	Up	0.000165443	0.0012934
lnc-TPST1-4	794	0	4	0.001	31.9904	14.9654	Up	0.000165443	0.00121604
lnc-TNFAIP3-5	1390	0	7	0.001	31.9789	14.9648	Up	5.88e-07	1.17e-05
lnc-ETS2-2	1183	0	5	0.001	31.9421	14.9632	Up	2.52e-05	0.000288068
lnc-RHCE-2	629	0	3	0.001	31.91	14.9617	Up	0.00108424	0.0063605
lnc-KLF4-5	597	0	3	0.001	31.91	14.9617	Up	0.00108424	0.00603575
lnc-SLC9A5-2	796	0	4	0.001	31.91	14.9617	Up	0.000165443	0.00130182
lnc-RP11-90M5.1.1-3	995	0	5	0.001	31.91	14.9617	Up	2.52e-05	0.000272559
lnc-EXO1-1	1393	0	7	0.001	31.91	14.9617	Up	5.88e-07	1.08e-05
lnc-AC018682.6.1-2	399	0	2	0.001	31.83	14.9581	Up	0.0071056	0.0256797
lnc-KIAA0196-8	399	0	2	0.001	31.83	14.9581	Up	0.0071056	0.0255224
lnc-CLNK-1	400	0	2	0.001	31.7505	14.9545	Up	0.0071056	0.0283506
lnc-ARHGAP27-2	800	0	4	0.001	31.7505	14.9545	Up	0.000165443	0.00134956
lnc-ADD3-6	600	0	3	0.001	31.7505	14.9545	Up	0.00108424	0.00622096
lnc-TMBIM4-2	1800	0	9	0.001	31.7505	14.9545	Up	1.37e-08	4.27e-07
lnc-WIBG-4	801	0	4	0.001	31.7108	14.9527	Up	0.000165443	0.00126355
lnc-ELAC2-2	802	0	4	0.001	31.6713	14.9509	Up	0.000165443	0.0013133
SLC25A51	1404	0	7	0.001	31.66	14.9504	Up	5.88e-07	1.13e-05
lnc-TMEM116-6	603	0	3	0.001	31.5925	14.9473	Up	0.00108424	0.00634512
lnc-DMXL2-3	201	0	1	0.001	31.5925	14.9473	Up	0.046567	0.123454
lnc-ELMOD2-1	402	0	2	0.001	31.5925	14.9473	Up	0.0071056	0.0259707
lnc-MLLT4-10	402	0	2	0.001	31.5925	14.9473	Up	0.0071056	0.0257518
lnc-RASGRP3-8	402	0	2	0.001	31.5925	14.9473	Up	0.0071056	0.0257253
lnc-XRCC2-10	1407	0	7	0.001	31.5925	14.9473	Up	5.88e-07	1.08e-05
lnc-GNPTG-1	805	0	4	0.001	31.5533	14.9455	Up	0.000165443	0.0012223
lnc-PTRH2-3	1008	0	5	0.001	31.4985	14.943	Up	2.52e-05	0.000264947
lnc-PLGLB2-5	202	0	1	0.001	31.4361	14.9401	Up	0.046567	0.123733
lnc-PCDH9-8	3031	0	15	0.001	31.4257	14.9397	Up	1.73e-13	1.49e-11
lnc-RAD18-3	607	0	3	0.001	31.3843	14.9378	Up	0.00108424	0.00593084
lnc-ACOT13-1	405	0	2	0.001	31.3585	14.9366	Up	0.0071056	0.0278652
lnc-SCAF8-5	2025	0	10	0.001	31.3585	14.9366	Up	2.09e-09	8.05e-08
lnc-ZNF462-5	1014	0	5	0.001	31.3121	14.9344	Up	2.52e-05	0.000268367
lnc-NCAM2-10	609	0	3	0.001	31.2812	14.933	Up	0.00108424	0.00628807
lnc-GABARAPL2-5	203	0	1	0.001	31.2812	14.933	Up	0.046567	0.122798
lnc-MKRN3-4	406	0	2	0.001	31.2812	14.933	Up	0.0071056	0.0273607
lnc-WWP1-3	406	0	2	0.001	31.2812	14.933	Up	0.0071056	0.0268557
lnc-FAT2-2	1015	0	5	0.001	31.2812	14.933	Up	2.52e-05	0.000269106
lnc-TRIB1-3	1218	0	6	0.001	31.2812	14.933	Up	3.85e-06	5.45e-05
lnc-CEP128-1	563	0	2	0.001	31.2812	14.933	Up	0.0071056	0.0260001
lnc-NUBP1-3	610	0	3	0.001	31.23	14.9306	Up	0.00108424	0.00601758
lnc-C9orf103-1	1017	0	5	0.001	31.2197	14.9302	Up	2.52e-05	0.000287221
lnc-HSFY2-3	860	0	8	0.001	31.2044	14.9295	Up	8.97e-08	2.22e-06
lnc-HMGB2-3	2036	0	10	0.001	31.1891	14.9288	Up	2.09e-09	8.15e-08
lnc-CCAR1-1	611	0	3	0.001	31.1789	14.9283	Up	0.00108424	0.00601155
lnc-AL445989.1-22	611	0	3	0.001	31.1789	14.9283	Up	0.00108424	0.00572376
lnc-HIST2H3PS2-5	408	0	2	0.001	31.1279	14.9259	Up	0.0071056	0.0275057
lnc-SULF1-4	204	0	1	0.001	31.1279	14.9259	Up	0.046567	0.111529
lnc-SLC25A21-2	613	0	3	0.001	31.0771	14.9236	Up	0.00108424	0.00560751
lnc-SLC7A1-4	409	0	2	0.001	31.0518	14.9224	Up	0.0071056	0.0281677
lnc-KCNJ14-1	615	0	3	0.001	30.9761	14.9189	Up	0.00108424	0.00626461
lnc-CDRT15-3	410	0	2	0.001	30.9761	14.9189	Up	0.0071056	0.027282
lnc-SLC23A2-1	205	0	1	0.001	30.9761	14.9189	Up	0.046567	0.118721
lnc-ITGB1-1	2051	0	10	0.001	30.961	14.9182	Up	2.09e-09	7.89e-08
lnc-GPR135-1	1438	0	7	0.001	30.9114	14.9159	Up	5.88e-07	1.14e-05
lnc-EMX2-5	553	0	2	0.001	30.9007	14.9154	Up	0.0071056	0.0283945
lnc-SFTPD-6	1028	0	5	0.001	30.8857	14.9146	Up	2.52e-05	0.000279578
ZNF880	2262	0	11	0.001	30.8802	14.9144	Up	3.19e-10	1.45e-08
lnc-C20orf3-3	823	0	4	0.001	30.8632	14.9136	Up	0.000165443	0.00126155
ACTRT1	1442	0	7	0.001	30.8257	14.9118	Up	5.88e-07	1.19e-05
lnc-COL12A1-1	618	0	3	0.001	30.8257	14.9118	Up	0.00108424	0.00621727
lnc-SRPK2-11	206	0	1	0.001	30.8257	14.9118	Up	0.046567	0.120531
lnc-HMHB1-1	825	0	4	0.001	30.7883	14.9101	Up	0.000165443	0.00134164
lnc-LPHN2-11	619	0	3	0.001	30.7759	14.9095	Up	0.00108424	0.00577019
lnc-OR51B4-4	620	0	3	0.001	30.7263	14.9072	Up	0.00108424	0.00604184
lnc-FSIP1-5	1654	0	8	0.001	30.7139	14.9066	Up	8.97e-08	2.29e-06
lnc-PRKAB2-5	1241	0	6	0.001	30.7015	14.906	Up	3.85e-06	5.77e-05
LOC403323	1448	0	7	0.001	30.698	14.9059	Up	5.88e-07	1.09e-05
lnc-RAD54L-3	414	0	2	0.001	30.6768	14.9049	Up	0.0071056	0.0283565
lnc-PARG-1	414	0	2	0.001	30.6768	14.9049	Up	0.0071056	0.0283127
lnc-TAOK1-1	414	0	2	0.001	30.6768	14.9049	Up	0.0071056	0.028136
lnc-BRCA2-2	828	0	4	0.001	30.6768	14.9049	Up	0.000165443	0.00124126
lnc-NAP1L3-7	829	0	4	0.001	30.6398	14.9031	Up	0.000165443	0.00124633
lnc-ZNF519-2	830	0	4	0.001	30.6029	14.9014	Up	0.000165443	0.00127334
lnc-HSPB9-1	415	0	2	0.001	30.6029	14.9014	Up	0.0071056	0.0257687
lnc-CCDC89-7	623	0	3	0.001	30.5783	14.9002	Up	0.00108424	0.00626648
lnc-ARF4-2	623	0	3	0.001	30.5783	14.9002	Up	0.00108424	0.00605317
lnc-ABCG1-4	623	0	3	0.001	30.5783	14.9002	Up	0.00108424	0.0056384
lnc-DLGAP5-4	623	0	3	0.001	30.5783	14.9002	Up	0.00108424	0.00560601
lnc-ZNF613-1	876	0	4	0.001	30.5293	14.8979	Up	0.000165443	0.00135012
lnc-PPP4R2-4	208	0	1	0.001	30.5293	14.8979	Up	0.046567	0.11682
lnc-EPHA1-4	416	0	2	0.001	30.5293	14.8979	Up	0.0071056	0.026468
lnc-TRIB2-15	832	0	4	0.001	30.5293	14.8979	Up	0.000165443	0.00126504
lnc-ANXA1-9	624	0	3	0.001	30.5293	14.8979	Up	0.00108424	0.0057853
lnc-FAM75D1-6	625	0	3	0.001	30.4804	14.8956	Up	0.00108424	0.00615797
lnc-SRSF6-10	417	0	2	0.001	30.4561	14.8944	Up	0.0071056	0.0285093
lnc-DCUN1D2-1	417	0	2	0.001	30.4561	14.8944	Up	0.0071056	0.0281995
lnc-YEATS4-1	417	0	2	0.001	30.4561	14.8944	Up	0.0071056	0.0267903
lnc-CREBZF-1	417	0	2	0.001	30.4561	14.8944	Up	0.0071056	0.0253624
lnc-PCDH20-20	1878	0	9	0.001	30.4318	14.8933	Up	1.37e-08	4.13e-07
GPR15	1252	0	6	0.001	30.4318	14.8933	Up	3.85e-06	5.29e-05
lnc-PLCB4-3	209	0	1	0.001	30.3832	14.891	Up	0.046567	0.117636
lnc-ACTR6-1	418	0	2	0.001	30.3832	14.891	Up	0.0071056	0.0264223
lnc-RBM45-5	209	0	1	0.001	30.3832	14.891	Up	0.046567	0.112828
lnc-SLC44A1-1	838	0	4	0.001	30.3107	14.8875	Up	0.000165443	0.00135987
lnc-SYT16-1	1676	0	8	0.001	30.3107	14.8875	Up	8.97e-08	2.28e-06
lnc-FAAH2-2	1677	0	8	0.001	30.2926	14.8867	Up	8.97e-08	2.34e-06
lnc-AZI2-4	210	0	1	0.001	30.2385	14.8841	Up	0.046567	0.114425
lnc-CLYBL-2	420	0	2	0.001	30.2385	14.8841	Up	0.0071056	0.0250414
lnc-LRCH3-1	1682	0	8	0.001	30.2026	14.8824	Up	8.97e-08	2.33e-06
lnc-SEC11C-1	842	0	4	0.001	30.1667	14.8807	Up	0.000165443	0.00129497
lnc-C1orf21-1	1896	0	9	0.001	30.1428	14.8795	Up	1.37e-08	4.32e-07
lnc-TRAT1-11	422	0	2	0.001	30.0952	14.8772	Up	0.0071056	0.0277108
lnc-FAM169A-3	211	0	1	0.001	30.0952	14.8772	Up	0.046567	0.117368
lnc-MKI67IP-1	633	0	3	0.001	30.0952	14.8772	Up	0.00108424	0.00556956
lnc-HNRPDL-1	1057	0	5	0.001	30.0383	14.8745	Up	2.52e-05	0.000259805
lnc-NRIP2-4	423	0	2	0.001	30.0241	14.8738	Up	0.0071056	0.0285596
lnc-GREM2-10	2115	0	10	0.001	30.0241	14.8738	Up	2.09e-09	7.76e-08
lnc-DTWD2-7	1271	0	6	0.001	29.9768	14.8716	Up	3.85e-06	5.75e-05
lnc-C10orf108-4	424	0	2	0.001	29.9533	14.8704	Up	0.0071056	0.0286191
lnc-SLTM-9	424	0	2	0.001	29.9533	14.8704	Up	0.0071056	0.0264782
lnc-AC217773.1-1	666	0	2	0.001	29.9533	14.8704	Up	0.0071056	0.0262232
lnc-TMEM207-1	1061	0	5	0.001	29.925	14.8691	Up	2.52e-05	0.000276728
lnc-PTPRZ1-6	3820	0	18	0.001	29.9219	14.8689	Up	6.14e-16	7.26e-14
LYPLAL1	1911	0	9	0.001	29.9062	14.8682	Up	1.37e-08	4.1e-07
lnc-VPS41-1	2337	0	11	0.001	29.8892	14.8673	Up	3.19e-10	1.46e-08
LINC00260	1275	0	6	0.001	29.8828	14.867	Up	3.85e-06	5.9e-05
lnc-UBLCP1-3	638	0	3	0.001	29.8594	14.8659	Up	0.00108424	0.00607507
lnc-EXOC2-28	1064	0	5	0.001	29.8407	14.865	Up	2.52e-05	0.000286211
lnc-PCDH7-9	770	0	3	0.001	29.8126	14.8636	Up	0.00108424	0.00629184
lnc-SLITRK2-1	1065	0	5	0.001	29.8126	14.8636	Up	2.52e-05	0.000285126
FAM26D	1491	0	7	0.001	29.8126	14.8636	Up	5.88e-07	1.13e-05
lnc-MEIS1-6	426	0	2	0.001	29.8126	14.8636	Up	0.0071056	0.0256103
lnc-BACH1-3	426	0	2	0.001	29.8126	14.8636	Up	0.0071056	0.02503
lnc-DLK1-13	640	0	3	0.001	29.7661	14.8614	Up	0.00108424	0.00575358
lnc-PID1-1	427	0	2	0.001	29.7428	14.8603	Up	0.0071056	0.0286072
lnc-ST3GAL6-5	427	0	2	0.001	29.7428	14.8603	Up	0.0071056	0.0280499
lnc-GPC6-6	1068	0	5	0.001	29.7289	14.8596	Up	2.52e-05	0.000258636
lnc-NPS-1	641	0	3	0.001	29.7196	14.8591	Up	0.00108424	0.00622742
lnc-LRRC61-6	428	0	2	0.001	29.6733	14.8569	Up	0.0071056	0.0278934
lnc-CXorf31-2	856	0	4	0.001	29.6733	14.8569	Up	0.000165443	0.00122534
lnc-FAM116A-1	1070	0	5	0.001	29.6733	14.8569	Up	2.52e-05	0.000257545
lnc-PTPN13-2	643	0	3	0.001	29.6272	14.8546	Up	0.00108424	0.00625993
lnc-PARP16-4	643	0	3	0.001	29.6272	14.8546	Up	0.00108424	0.0056796
lnc-KCNA4-2	429	0	2	0.001	29.6042	14.8535	Up	0.0071056	0.0277695
lnc-HMGB2-2	1073	0	5	0.001	29.5904	14.8528	Up	2.52e-05	0.000272331
lnc-STAP1-8	1503	0	7	0.001	29.5746	14.8521	Up	5.88e-07	1.15e-05
lnc-TMEM194B-3	430	0	2	0.001	29.5353	14.8502	Up	0.0071056	0.026903
lnc-PHF14-12	214	0	1	0.001	29.5353	14.8502	Up	0.046567	0.114113
lnc-CCDC7-6	1075	0	5	0.001	29.5353	14.8502	Up	2.52e-05	0.00026366
CALR3	1292	0	6	0.001	29.4896	14.8479	Up	3.85e-06	5.74e-05
lnc-ZNF680-11	431	0	2	0.001	29.4668	14.8468	Up	0.0071056	0.0264197
lnc-SETD6-3	431	0	2	0.001	29.4668	14.8468	Up	0.0071056	0.025788
lnc-CHD2-6	977	0	5	0.001	29.4531	14.8461	Up	2.52e-05	0.000265812
ECEL1P2	1295	0	6	0.001	29.4213	14.8446	Up	3.85e-06	5.91e-05
lnc-FZD3-1	443	0	2	0.001	29.3986	14.8435	Up	0.0071056	0.0276495
lnc-ATP6V1G3-8	216	0	1	0.001	29.3986	14.8435	Up	0.046567	0.113962
lnc-IGLL1-3	1081	0	5	0.001	29.3714	14.8421	Up	2.52e-05	0.000270597
lnc-ASPH-2	2595	0	12	0.001	29.3646	14.8418	Up	4.86e-11	2.7e-09
lnc-CCKAR-4	649	0	3	0.001	29.3533	14.8412	Up	0.00108424	0.00615436
lnc-C3orf26-1	2164	0	10	0.001	29.3442	14.8408	Up	2.09e-09	7.82e-08
lnc-UEVLD-4	433	0	2	0.001	29.3307	14.8401	Up	0.0071056	0.0253413
LGALS14	1083	0	5	0.001	29.3171	14.8395	Up	2.52e-05	0.000274012
lnc-NENF-2	650	0	3	0.001	29.3081	14.839	Up	0.00108424	0.00559331
lnc-FREM3-8	434	0	2	0.001	29.2631	14.8368	Up	0.0071056	0.0272468
lnc-CYP7A1-8	434	0	2	0.001	29.2631	14.8368	Up	0.0071056	0.0268688
lnc-FAM27B-9	217	0	1	0.001	29.2631	14.8368	Up	0.046567	0.117208
ZNF491	2823	0	13	0.001	29.2424	14.8358	Up	7.42e-12	4.87e-10
lnc-AC127496.3-3	869	0	4	0.001	29.2294	14.8351	Up	0.000165443	0.00133104
lnc-GPC5-2	1738	0	8	0.001	29.2294	14.8351	Up	8.97e-08	2.28e-06
lnc-ETFDH-5	652	0	3	0.001	29.2182	14.8346	Up	0.00108424	0.00571285
lnc-CALB2-2	652	0	3	0.001	29.2182	14.8346	Up	0.00108424	0.00556734
lnc-F8A3-1	435	0	2	0.001	29.1958	14.8335	Up	0.0071056	0.0277303
lnc-DEFB1-3	435	0	2	0.001	29.1958	14.8335	Up	0.0071056	0.0265575
lnc-ZNF395-5	435	0	2	0.001	29.1958	14.8335	Up	0.0071056	0.0264426
lnc-TMEM62-1	1088	0	5	0.001	29.1824	14.8328	Up	2.52e-05	0.000290811
lnc-DUSP19-4	1960	0	9	0.001	29.1586	14.8316	Up	1.37e-08	4.23e-07
lnc-AP000783.1.1-5	218	0	1	0.001	29.1289	14.8302	Up	0.046567	0.123049
lnc-FARP2-2	415	0	1	0.001	29.1289	14.8302	Up	0.046567	0.121555
lnc-STK39-5	218	0	1	0.001	29.1289	14.8302	Up	0.046567	0.11351
lnc-WHAMM-3	1091	0	5	0.001	29.1022	14.8288	Up	2.52e-05	0.000265091
lnc-ZNF23-5	874	0	4	0.001	29.0622	14.8269	Up	0.000165443	0.00135412
lnc-VOPP1-5	437	0	2	0.001	29.0622	14.8269	Up	0.0071056	0.0253063
lnc-SENP5-5	656	0	3	0.001	29.0401	14.8258	Up	0.00108424	0.00630792
lnc-DCUN1D1-11	656	0	3	0.001	29.0401	14.8258	Up	0.00108424	0.0058368
LOC389641	1970	0	9	0.001	29.0106	14.8243	Up	1.37e-08	4.15e-07
lnc-C6orf195-19	438	0	2	0.001	28.9959	14.8236	Up	0.0071056	0.0285359
lnc-FGFR1OP2-2	876	0	4	0.001	28.9959	14.8236	Up	0.000165443	0.00135498
lnc-EMILIN2-5	657	0	3	0.001	28.9959	14.8236	Up	0.00108424	0.00621819
lnc-CTD-2368P22.1.1-2	1533	0	7	0.001	28.9959	14.8236	Up	5.88e-07	1.15e-05
lnc-HUWE1-2	219	0	1	0.001	28.9959	14.8236	Up	0.046567	0.118768
lnc-C22orf26-6	438	0	2	0.001	28.9959	14.8236	Up	0.0071056	0.026932
lnc-AC006465.3.1-1	438	0	2	0.001	28.9959	14.8236	Up	0.0071056	0.0257784
lnc-OR6J1-1	438	0	2	0.001	28.9959	14.8236	Up	0.0071056	0.0252599
lnc-EFHA2-4	439	0	2	0.001	28.9298	14.8203	Up	0.0071056	0.0281533
lnc-TGFBI-4	439	0	2	0.001	28.9298	14.8203	Up	0.0071056	0.0275802
lnc-SEL1L2-1	439	0	2	0.001	28.9298	14.8203	Up	0.0071056	0.0263085
lnc-CACNB2-1	3519	0	16	0.001	28.8723	14.8174	Up	2.64e-14	2.56e-12
lnc-PLEKHA7-3	709	0	3	0.001	28.8641	14.817	Up	0.00108424	0.00593419
lnc-CBY3-2	1100	0	5	0.001	28.8641	14.817	Up	2.52e-05	0.00027294
lnc-MME-1	1761	0	8	0.001	28.8477	14.8162	Up	8.97e-08	2.21e-06
lnc-DDR1-3	881	0	4	0.001	28.8313	14.8153	Up	0.000165443	0.00124463
lnc-C19orf69-2	661	0	3	0.001	28.8204	14.8148	Up	0.00108424	0.00562253
CGRRF1	1323	0	6	0.001	28.7986	14.8137	Up	3.85e-06	5.91e-05
lnc-C10orf28-3	1765	0	8	0.001	28.7823	14.8129	Up	8.97e-08	2.24e-06
lnc-STIL-5	1766	0	8	0.001	28.766	14.8121	Up	8.97e-08	2.15e-06
NOP16	1325	0	6	0.001	28.7551	14.8115	Up	3.85e-06	5.37e-05
lnc-CDC73-13	442	0	2	0.001	28.7335	14.8104	Up	0.0071056	0.0281159
LOC729930	1105	0	5	0.001	28.7335	14.8104	Up	2.52e-05	0.000282979
lnc-GK-8	663	0	3	0.001	28.7335	14.8104	Up	0.00108424	0.00567653
lnc-NOS2-9	664	0	3	0.001	28.6902	14.8083	Up	0.00108424	0.0057877
TUBA3C	1551	0	7	0.001	28.6594	14.8067	Up	5.88e-07	1.09e-05
lnc-C6orf62-1	887	0	4	0.001	28.6363	14.8056	Up	0.000165443	0.00129655
lnc-C12orf35-3	444	0	2	0.001	28.604	14.8039	Up	0.0071056	0.0285182
lnc-TMEM50B-1	666	0	3	0.001	28.604	14.8039	Up	0.00108424	0.00605841
lnc-RP11-181C3.1.1-5	222	0	1	0.001	28.604	14.8039	Up	0.046567	0.116692
lnc-NKX6-1-5	222	0	1	0.001	28.604	14.8039	Up	0.046567	0.110166
lnc-RP11-422N16.3.1-5	1111	0	5	0.001	28.5783	14.8026	Up	2.52e-05	0.000282815
lnc-TUBB2B-4	445	0	2	0.001	28.5397	14.8007	Up	0.0071056	0.0285389
lnc-AC009336.1-11	1780	0	8	0.001	28.5397	14.8007	Up	8.97e-08	2.33e-06
lnc-TYW1-4	445	0	2	0.001	28.5397	14.8007	Up	0.0071056	0.0280671
UQCR11	1335	0	6	0.001	28.5397	14.8007	Up	3.85e-06	5.57e-05
OR4C15	1113	0	5	0.001	28.5269	14.8	Up	2.52e-05	0.000258499
lnc-GABRA2-1	668	0	3	0.001	28.5184	14.7996	Up	0.00108424	0.00599951
lnc-TCTEX1D1-2	223	0	1	0.001	28.4758	14.7974	Up	0.046567	0.119874
lnc-RBM11-9	446	0	2	0.001	28.4758	14.7974	Up	0.0071056	0.0269822
lnc-PRDM9-6	446	0	2	0.001	28.4758	14.7974	Up	0.0071056	0.0260568
NFIA-AS2	1115	0	5	0.001	28.4758	14.7974	Up	2.52e-05	0.000256396
lnc-CDR2L-2	2454	0	11	0.001	28.4642	14.7969	Up	3.19e-10	1.5e-08
lnc-OFCC1-3	893	0	4	0.001	28.4439	14.7958	Up	0.000165443	0.00127056
lnc-NBPF6-7	670	0	3	0.001	28.4333	14.7953	Up	0.00108424	0.00578052
lnc-ETS2-4	447	0	2	0.001	28.4121	14.7942	Up	0.0071056	0.0279473
lnc-FUK-2	447	0	2	0.001	28.4121	14.7942	Up	0.0071056	0.0259977
C17orf58	1566	0	7	0.001	28.3848	14.7928	Up	5.88e-07	1.1e-05
lnc-TGFBRAP1-16	895	0	4	0.001	28.3803	14.7926	Up	0.000165443	0.00125218
lnc-ZDHHC2-3	2238	0	10	0.001	28.374	14.7923	Up	2.09e-09	7.95e-08
lnc-PRKAR2B-3	448	0	2	0.001	28.3486	14.791	Up	0.0071056	0.0276912
lnc-GREM2-7	448	0	2	0.001	28.3486	14.791	Up	0.0071056	0.027263
lnc-SLTM-3	448	0	2	0.001	28.3486	14.791	Up	0.0071056	0.0255437
lnc-IQCJ-2	224	0	1	0.001	28.3486	14.791	Up	0.046567	0.111185
lnc-AC016745.1-7	1571	0	7	0.001	28.2945	14.7882	Up	5.88e-07	1.18e-05
lnc-SPATA12-5	577	0	4	0.001	28.254	14.7862	Up	0.000165443	0.00128124
C15orf26	1575	0	7	0.001	28.2226	14.7846	Up	5.88e-07	1.19e-05
lnc-MYB-8	1350	0	6	0.001	28.2226	14.7846	Up	3.85e-06	5.87e-05
lnc-EGFL6-1	450	0	2	0.001	28.2226	14.7846	Up	0.0071056	0.0275305
TAS2R4	900	0	4	0.001	28.2226	14.7846	Up	0.000165443	0.00127894
ICT1	900	0	4	0.001	28.2226	14.7846	Up	0.000165443	0.00124803
lnc-GATA3-4	901	0	4	0.001	28.1913	14.783	Up	0.000165443	0.00130341
lnc-SLC27A4-3	901	0	4	0.001	28.1913	14.783	Up	0.000165443	0.00128613
lnc-SLC6A17-3	451	0	2	0.001	28.1601	14.7814	Up	0.0071056	0.0285064
lnc-TMEM45B-1	902	0	4	0.001	28.1601	14.7814	Up	0.000165443	0.00132856
LOC101927296	902	0	4	0.001	28.1601	14.7814	Up	0.000165443	0.00131898
lnc-DIO2-6	451	0	2	0.001	28.1601	14.7814	Up	0.0071056	0.02684
lnc-CHST10-3	2256	0	10	0.001	28.1476	14.7807	Up	2.09e-09	8.13e-08
lnc-SH3BGRL-2	903	0	4	0.001	28.1289	14.7798	Up	0.000165443	0.00136016
lnc-CCNDBP1-3	226	0	1	0.001	28.0978	14.7782	Up	0.046567	0.115941
HIST3H2BB	452	0	2	0.001	28.0978	14.7782	Up	0.0071056	0.0261484
lnc-C14orf162-2	452	0	2	0.001	28.0978	14.7782	Up	0.0071056	0.0252459
lnc-DHX37-28	678	0	3	0.001	28.0978	14.7782	Up	0.00108424	0.00558215
lnc-LRRTM3-4	3619	0	16	0.001	28.0745	14.777	Up	2.64e-14	2.53e-12
lnc-CERKL-8	1584	0	7	0.001	28.0623	14.7763	Up	5.88e-07	1.14e-05
lnc-C9orf50-1	453	0	2	0.001	28.0357	14.775	Up	0.0071056	0.0278426
lnc-RP11-467M13.1.1-6	453	0	2	0.001	28.0357	14.775	Up	0.0071056	0.0272711
lnc-KIAA1239-4	453	0	2	0.001	28.0357	14.775	Up	0.0071056	0.0260864
OR10AG1	906	0	4	0.001	28.0357	14.775	Up	0.000165443	0.00123052
lnc-DPPA2-1	680	0	3	0.001	28.0151	14.7739	Up	0.00108424	0.00607243
lnc-CBR1-9	1360	0	6	0.001	28.0151	14.7739	Up	3.85e-06	5.55e-05
lnc-WDR91-3	1815	0	8	0.001	27.9894	14.7726	Up	8.97e-08	2.23e-06
lnc-RP11-113D6.10.1-1	681	0	3	0.001	27.974	14.7718	Up	0.00108424	0.0062909
lnc-KIAA0754-4	227	0	1	0.001	27.974	14.7718	Up	0.046567	0.117033
lnc-SLC45A2-1	681	0	3	0.001	27.974	14.7718	Up	0.00108424	0.00583112
MAL	1137	0	5	0.001	27.9248	14.7693	Up	2.52e-05	0.000271952
KXD1	1592	0	7	0.001	27.9213	14.7691	Up	5.88e-07	1.14e-05
lnc-UGP2-5	634	0	4	0.001	27.9125	14.7686	Up	0.000165443	0.00133049
lnc-SLITRK6-9	910	0	4	0.001	27.9125	14.7686	Up	0.000165443	0.0012815
lnc-DCAF8L1-7	455	0	2	0.001	27.9125	14.7686	Up	0.0071056	0.0251789
lnc-C15orf41-9	228	0	1	0.001	27.8513	14.7655	Up	0.046567	0.116722
lnc-RP11-111K18.1.1-1	1369	0	6	0.001	27.8309	14.7644	Up	3.85e-06	5.93e-05
lnc-ALB-7	457	0	2	0.001	27.7903	14.7623	Up	0.0071056	0.0271849
lnc-NLGN4X-2	1143	0	5	0.001	27.7782	14.7617	Up	2.52e-05	0.000290898
lnc-CARTPT-2	1143	0	5	0.001	27.7782	14.7617	Up	2.52e-05	0.000288238
NSRP1	2515	0	11	0.001	27.7738	14.7614	Up	3.19e-10	1.52e-08
lnc-PLCL2-2	458	0	2	0.001	27.7297	14.7591	Up	0.0071056	0.0281763
lnc-DYNLT1-2	229	0	1	0.001	27.7297	14.7591	Up	0.046567	0.117018
lnc-PNPLA3-3	229	0	1	0.001	27.7297	14.7591	Up	0.046567	0.111591
lnc-CNOT6-9	687	0	3	0.001	27.7297	14.7591	Up	0.00108424	0.00562028
lnc-CCDC59-2	459	0	2	0.001	27.6693	14.756	Up	0.0071056	0.0283331
lnc-VRK2-3	394	0	4	0.001	27.6693	14.756	Up	0.000165443	0.00133132
lnc-MIA3-3	455	0	5	0.001	27.6572	14.7554	Up	2.52e-05	0.000261263
lnc-ZFPM2-2	230	0	1	0.001	27.6091	14.7529	Up	0.046567	0.117867
lnc-C6orf57-8	460	0	2	0.001	27.6091	14.7529	Up	0.0071056	0.0267721
lnc-C21orf67-7	460	0	2	0.001	27.6091	14.7529	Up	0.0071056	0.0265319
SRGAP2D	2301	0	10	0.001	27.5971	14.7522	Up	2.09e-09	7.73e-08
lnc-YPEL5-3	691	0	3	0.001	27.5691	14.7508	Up	0.00108424	0.0058917
lnc-RB1-2	922	0	4	0.001	27.5492	14.7497	Up	0.000165443	0.00134417
lnc-CXorf26-4	461	0	2	0.001	27.5492	14.7497	Up	0.0071056	0.0271822
lnc-ASH2L-2	461	0	2	0.001	27.5492	14.7497	Up	0.0071056	0.0261286
lnc-TAS2R42-3	922	0	4	0.001	27.5492	14.7497	Up	0.000165443	0.00122394
lnc-TIAF1-3	692	0	3	0.001	27.5293	14.7487	Up	0.00108424	0.00631171
lnc-UBE2E3-7	692	0	3	0.001	27.5293	14.7487	Up	0.00108424	0.00579729
lnc-SPC25-5	1155	0	5	0.001	27.4896	14.7466	Up	2.52e-05	0.000277671
lnc-OSR2-3	693	0	3	0.001	27.4896	14.7466	Up	0.00108424	0.00562555
lnc-AC006156.2-10	1618	0	7	0.001	27.4726	14.7457	Up	5.88e-07	1.1e-05
lnc-LRFN2-3	694	0	3	0.001	27.45	14.7445	Up	0.00108424	0.00571207
lnc-TPP2-3	926	0	4	0.001	27.4302	14.7435	Up	0.000165443	0.0013593
FBXL12	1852	0	8	0.001	27.4302	14.7435	Up	8.97e-08	2.27e-06
lnc-PFKP-22	463	0	2	0.001	27.4302	14.7435	Up	0.0071056	0.0262809
lnc-RP11-295D22.1.1-4	1389	0	6	0.001	27.4302	14.7435	Up	3.85e-06	5.37e-05
lnc-SETD6-8	1158	0	5	0.001	27.4184	14.7429	Up	2.52e-05	0.000258157
lnc-ACSBG1-6	695	0	3	0.001	27.4105	14.7424	Up	0.00108424	0.00623853
lnc-NXPH2-9	927	0	4	0.001	27.4006	14.7419	Up	0.000165443	0.0012135
lnc-FBXL7-5	464	0	2	0.001	27.3711	14.7404	Up	0.0071056	0.028185
lnc-LMO2-4	696	0	3	0.001	27.3711	14.7404	Up	0.00108424	0.00601585
lnc-VWDE-5	464	0	2	0.001	27.3711	14.7404	Up	0.0071056	0.0252529
lnc-ZNF516-6	464	0	2	0.001	27.3711	14.7404	Up	0.0071056	0.0251054
lnc-CCDC90B-8	697	0	3	0.001	27.3318	14.7383	Up	0.00108424	0.00611401
lnc-USP20-1	697	0	3	0.001	27.3318	14.7383	Up	0.00108424	0.00566733
lnc-FGF12-3	1631	0	7	0.001	27.2536	14.7342	Up	5.88e-07	1.14e-05
OR2A12	933	0	4	0.001	27.2244	14.7326	Up	0.000165443	0.00134389
lnc-BMP4-2	700	0	3	0.001	27.2147	14.7321	Up	0.00108424	0.00626554
TMEM98	1867	0	8	0.001	27.2098	14.7318	Up	8.97e-08	2.16e-06
TPMT	3269	0	14	0.001	27.1953	14.7311	Up	1.13e-12	8.8e-11
lnc-BTG3-12	467	0	2	0.001	27.1953	14.7311	Up	0.0071056	0.0273552
lnc-AQP9-5	934	0	4	0.001	27.1953	14.7311	Up	0.000165443	0.00120641
lnc-C6orf221-4	1168	0	5	0.001	27.1836	14.7304	Up	2.52e-05	0.000265307
lnc-TDO2-3	935	0	4	0.001	27.1662	14.7295	Up	0.000165443	0.00122699
lnc-KY-4	2338	0	10	0.001	27.1604	14.7292	Up	2.09e-09	8.32e-08
lnc-ZNF700-1	468	0	2	0.001	27.1372	14.728	Up	0.0071056	0.0272576
lnc-GATA3-13	234	0	1	0.001	27.1372	14.728	Up	0.046567	0.114128
lnc-SSTR4-1	1406	0	6	0.001	27.0985	14.7259	Up	3.85e-06	5.74e-05
lnc-KIF26B-1	703	0	3	0.001	27.0985	14.7259	Up	0.00108424	0.00597559
lnc-ALDH7A1-10	469	0	2	0.001	27.0793	14.7249	Up	0.0071056	0.0277864
lnc-TOX-1	469	0	2	0.001	27.0793	14.7249	Up	0.0071056	0.0266682
lnc-FZD5-1	469	0	2	0.001	27.0793	14.7249	Up	0.0071056	0.0264961
lnc-ITM2A-3	469	0	2	0.001	27.0793	14.7249	Up	0.0071056	0.0263463
lnc-CASP10-3	704	0	3	0.001	27.0601	14.7239	Up	0.00108424	0.00571129
lnc-TSPY4-8	470	0	2	0.001	27.0217	14.7218	Up	0.0071056	0.0279019
lnc-SOD2-3	706	0	3	0.001	26.9834	14.7198	Up	0.00108424	0.00620165
lnc-MRPL47-4	707	0	3	0.001	26.9452	14.7177	Up	0.00108424	0.00614535
TRHR	1414	0	6	0.001	26.9452	14.7177	Up	3.85e-06	5.32e-05
lnc-SUSD1-5	236	0	1	0.001	26.9072	14.7157	Up	0.046567	0.116436
lnc-PSMD10-2	1889	0	8	0.001	26.8929	14.7149	Up	8.97e-08	2.19e-06
OR10A3	945	0	4	0.001	26.8787	14.7142	Up	0.000165443	0.0013082
STAC3	1654	0	7	0.001	26.8746	14.714	Up	5.88e-07	1.13e-05
lnc-PHF10-1	709	0	3	0.001	26.8692	14.7137	Up	0.00108424	0.00572845
HIST1H3H	473	0	2	0.001	26.8503	14.7127	Up	0.0071056	0.0281966
lnc-ADRBK2-6	473	0	2	0.001	26.8503	14.7127	Up	0.0071056	0.0260939
lnc-C11orf30-2	710	0	3	0.001	26.8314	14.7116	Up	0.00108424	0.00572298
lnc-RAD9A-2	237	0	1	0.001	26.7936	14.7096	Up	0.046567	0.118612
lnc-WWC1-1	474	0	2	0.001	26.7936	14.7096	Up	0.0071056	0.0255319
lnc-LRRC58-1	1185	0	5	0.001	26.7936	14.7096	Up	2.52e-05	0.000257953
lnc-MEX3D-5	712	0	3	0.001	26.756	14.7076	Up	0.00108424	0.00623297
lnc-BORA-15	475	0	2	0.001	26.7372	14.7066	Up	0.0071056	0.026079
lnc-NMBR-5	2613	0	11	0.001	26.7321	14.7063	Up	3.19e-10	1.47e-08
lnc-SYNDIG1-6	2376	0	10	0.001	26.726	14.706	Up	2.09e-09	8.07e-08
lnc-LYRM4-2	1188	0	5	0.001	26.726	14.706	Up	2.52e-05	0.000262104
lnc-UEVLD-5	713	0	3	0.001	26.7185	14.7056	Up	0.00108424	0.00627585
lnc-AIPL1-5	1970	0	2	0.001	26.6811	14.7035	Up	0.0071056	0.0276051
lnc-EIF4ENIF1-5	238	0	1	0.001	26.6811	14.7035	Up	0.046567	0.120234
lnc-C17orf79-2	476	0	2	0.001	26.6811	14.7035	Up	0.0071056	0.0272414
lnc-FAM63B-3	476	0	2	0.001	26.6811	14.7035	Up	0.0071056	0.0268478
lnc-NR2F1-4	572	0	4	0.001	26.6811	14.7035	Up	0.000165443	0.00126255
lnc-PCDH19-4	952	0	4	0.001	26.6811	14.7035	Up	0.000165443	0.001223
lnc-RP11-422N16.3.1-8	715	0	3	0.001	26.6437	14.7015	Up	0.00108424	0.00634224
lnc-FAM210A-7	477	0	2	0.001	26.6251	14.7005	Up	0.0071056	0.0274426
lnc-RP11-127H5.1.1-1	716	0	3	0.001	26.6065	14.6995	Up	0.00108424	0.0061925
lnc-DCAF12-1	2628	0	11	0.001	26.5795	14.698	Up	3.19e-10	1.52e-08
lnc-C9orf85-3	717	0	3	0.001	26.5694	14.6975	Up	0.00108424	0.00635184
lnc-SH2D5-1	479	0	2	0.001	26.514	14.6945	Up	0.0071056	0.0282574
lnc-ERCC8-1	479	0	2	0.001	26.514	14.6945	Up	0.0071056	0.0269928
lnc-SRPRB-3	1917	0	8	0.001	26.5001	14.6937	Up	8.97e-08	2.27e-06
lnc-MMD-7	719	0	3	0.001	26.4955	14.6935	Up	0.00108424	0.00633458
lnc-FAM164A-5	1438	0	6	0.001	26.4955	14.6935	Up	3.85e-06	5.32e-05
lnc-LRRC4C-7	2638	0	11	0.001	26.4788	14.6925	Up	3.19e-10	1.46e-08
lnc-FGF19-2	720	0	3	0.001	26.4587	14.6915	Up	0.00108424	0.00638761
lnc-EGFL6-2	668	0	9	0.001	26.4587	14.6915	Up	1.37e-08	4.39e-07
lnc-LRMP-8	480	0	2	0.001	26.4587	14.6915	Up	0.0071056	0.0254893
lnc-UBXN4-10	721	0	3	0.001	26.422	14.6895	Up	0.00108424	0.00565207
lnc-CTSL1-3	721	0	3	0.001	26.422	14.6895	Up	0.00108424	0.00563159
lnc-NCALD-2	481	0	2	0.001	26.4037	14.6885	Up	0.0071056	0.0258729
lnc-TK2-4	722	0	3	0.001	26.3854	14.6875	Up	0.00108424	0.00620349
lnc-KIF20B-8	482	0	2	0.001	26.3489	14.6855	Up	0.0071056	0.0264172
lnc-RAG1-1	482	0	2	0.001	26.3489	14.6855	Up	0.0071056	0.0260593
lnc-MBOAT4-8	482	0	2	0.001	26.3489	14.6855	Up	0.0071056	0.0260149
lnc-USP35-15	482	0	2	0.001	26.3489	14.6855	Up	0.0071056	0.0251835
lnc-SNRPB-1	965	0	4	0.001	26.3216	14.684	Up	0.000165443	0.00130447
lnc-TMEM178-2	853	0	4	0.001	26.3216	14.684	Up	0.000165443	0.00122605
lnc-C3orf58-5	1448	0	6	0.001	26.3125	14.6835	Up	3.85e-06	5.43e-05
lnc-FARP1-5	724	0	3	0.001	26.3125	14.6835	Up	0.00108424	0.00571908
TMEM207	1448	0	6	0.001	26.3125	14.6835	Up	3.85e-06	5.33e-05
lnc-RASGRP3-9	2656	0	11	0.001	26.2993	14.6827	Up	3.19e-10	1.54e-08
lnc-PLOD2-6	483	0	2	0.001	26.2944	14.6825	Up	0.0071056	0.0273145
lnc-ODZ2-3	483	0	2	0.001	26.2944	14.6825	Up	0.0071056	0.0255508
lnc-KLF16-1	725	0	3	0.001	26.2762	14.6815	Up	0.00108424	0.00572532
ULBP1	3142	0	13	0.001	26.2735	14.6813	Up	7.42e-12	4.96e-10
lnc-TET2-1	484	0	2	0.001	26.2401	14.6795	Up	0.0071056	0.0271366
lnc-TRAPPC6B-5	484	0	2	0.001	26.2401	14.6795	Up	0.0071056	0.0270326
lnc-MTRR-10	969	0	4	0.001	26.213	14.678	Up	0.000165443	0.00124439
lnc-CR2-3	727	0	3	0.001	26.204	14.6775	Up	0.00108424	0.00568653
METTL23	1212	0	5	0.001	26.1968	14.6771	Up	2.52e-05	0.000263376
lnc-RBPMS2-4	485	0	2	0.001	26.186	14.6765	Up	0.0071056	0.0282807
lnc-WRNIP1-17	485	0	2	0.001	26.186	14.6765	Up	0.0071056	0.027377
lnc-C6orf99-7	1284	0	4	0.001	26.186	14.6765	Up	0.000165443	0.00128665
lnc-ZNF227-2	713	0	2	0.001	26.186	14.6765	Up	0.0071056	0.0252808
lnc-EVX1-20	728	0	3	0.001	26.168	14.6755	Up	0.00108424	0.00604619
lnc-SLC1A1-13	728	0	3	0.001	26.168	14.6755	Up	0.00108424	0.0056475
lnc-RNF2-2	2429	0	10	0.001	26.1428	14.6741	Up	2.09e-09	8.27e-08
lnc-DHX37-8	486	0	2	0.001	26.1321	14.6735	Up	0.0071056	0.0270885
lnc-CAPRIN2-6	1944	0	8	0.001	26.1321	14.6735	Up	8.97e-08	2.25e-06
lnc-GLIS2-3	243	0	1	0.001	26.1321	14.6735	Up	0.046567	0.111474
lnc-GNG5-8	2431	0	10	0.001	26.1213	14.6729	Up	2.09e-09	8.31e-08
lnc-TPPP-1	2918	0	12	0.001	26.1142	14.6725	Up	4.86e-11	2.74e-09
lnc-LIPG-1	2190	0	9	0.001	26.0963	14.6716	Up	1.37e-08	4.1e-07
CCNE1	1947	0	8	0.001	26.0918	14.6713	Up	8.97e-08	2.18e-06
lnc-ZNF192-4	487	0	2	0.001	26.0784	14.6706	Up	0.0071056	0.02799
lnc-FAM81B-3	974	0	4	0.001	26.0784	14.6706	Up	0.000165443	0.00129524
lnc-SRPK2-6	487	0	2	0.001	26.0784	14.6706	Up	0.0071056	0.0267981
FAM151B	1705	0	7	0.001	26.0708	14.6701	Up	5.88e-07	1.11e-05
lnc-GABRG1-4	1705	0	7	0.001	26.0708	14.6701	Up	5.88e-07	1.1e-05
lnc-F3-5	488	0	2	0.001	26.025	14.6676	Up	0.0071056	0.0284975
lnc-PEX2-3	488	0	2	0.001	26.025	14.6676	Up	0.0071056	0.0267226
lnc-ADAMTS18-4	488	0	2	0.001	26.025	14.6676	Up	0.0071056	0.0266063
KCNV1	2929	0	12	0.001	26.0161	14.6671	Up	4.86e-11	2.62e-09
lnc-ERCC5-4	977	0	4	0.001	25.9983	14.6661	Up	0.000165443	0.00134615
lnc-REG1A-4	733	0	3	0.001	25.9895	14.6656	Up	0.00108424	0.00614895
lnc-CDH9-7	733	0	3	0.001	25.9895	14.6656	Up	0.00108424	0.00600466
lnc-RAB27B-6	733	0	3	0.001	25.9895	14.6656	Up	0.00108424	0.00580531
lnc-FCER1A-1	1711	0	7	0.001	25.9793	14.6651	Up	5.88e-07	1.1e-05
lnc-SPATA5-1	1467	0	6	0.001	25.9718	14.6647	Up	3.85e-06	5.71e-05
lnc-CELF4-14	1712	0	7	0.001	25.9642	14.6642	Up	5.88e-07	1.1e-05
lnc-COQ10B-3	979	0	4	0.001	25.9452	14.6632	Up	0.000165443	0.00137035
lnc-FAS-1	1224	0	5	0.001	25.9399	14.6629	Up	2.52e-05	0.000281755
lnc-C22orf24-3	490	0	2	0.001	25.9187	14.6617	Up	0.0071056	0.0271072
lnc-FAM120B-7	490	0	2	0.001	25.9187	14.6617	Up	0.0071056	0.026806
lnc-HTR7-2	981	0	4	0.001	25.8923	14.6602	Up	0.000165443	0.0012512
lnc-ADHFE1-1	982	0	4	0.001	25.866	14.6588	Up	0.000165443	0.00125982
lnc-EBF1-6	491	0	2	0.001	25.866	14.6588	Up	0.0071056	0.0258535
YIPF4	1965	0	8	0.001	25.8528	14.658	Up	8.97e-08	2.26e-06
lnc-MPHOSPH8-7	1230	0	5	0.001	25.8134	14.6558	Up	2.52e-05	0.000286547
PPIAL4G	738	0	3	0.001	25.8134	14.6558	Up	0.00108424	0.00588344
lnc-C15orf24-2	739	0	3	0.001	25.7785	14.6539	Up	0.00108424	0.00616793
lnc-TBP-5	739	0	3	0.001	25.7785	14.6539	Up	0.00108424	0.005979
lnc-STS-3	739	0	3	0.001	25.7785	14.6539	Up	0.00108424	0.00565359
lnc-GTSF1L-5	493	0	2	0.001	25.761	14.6529	Up	0.0071056	0.0278201
lnc-POPDC2-1	1480	0	6	0.001	25.7436	14.6519	Up	3.85e-06	5.75e-05
lnc-CTH-2	740	0	3	0.001	25.7436	14.6519	Up	0.00108424	0.00561877
lnc-MTMR1-2	494	0	2	0.001	25.7089	14.65	Up	0.0071056	0.0281648
lnc-CLEC3A-9	494	0	2	0.001	25.7089	14.65	Up	0.0071056	0.0269531
PF4V1	741	0	3	0.001	25.7089	14.65	Up	0.00108424	0.00557621
lnc-STAG2-4	2225	0	9	0.001	25.6858	14.6487	Up	1.37e-08	4.24e-07
lnc-ADARB2-5	742	0	3	0.001	25.6742	14.648	Up	0.00108424	0.0059918
lnc-THRB-1	2968	0	12	0.001	25.6742	14.648	Up	4.86e-11	2.62e-09
lnc-CELF3-1	742	0	3	0.001	25.6742	14.648	Up	0.00108424	0.00571518
lnc-AC009336.1-3	495	0	2	0.001	25.6569	14.6471	Up	0.0071056	0.0257735
lnc-AC019294.2-2	495	0	2	0.001	25.6569	14.6471	Up	0.0071056	0.0254586
lnc-ACSM3-3	743	0	3	0.001	25.6397	14.6461	Up	0.00108424	0.00555628
WNT9A	1240	0	5	0.001	25.6052	14.6442	Up	2.52e-05	0.000284048
lnc-ZNF680-33	1488	0	6	0.001	25.6052	14.6442	Up	3.85e-06	5.52e-05
lnc-GLRB-5	993	0	4	0.001	25.5794	14.6427	Up	0.000165443	0.00125488
lnc-GS1-211B7.1.1-5	497	0	2	0.001	25.5537	14.6412	Up	0.0071056	0.0270113
lnc-NPAS3-3	1491	0	6	0.001	25.5537	14.6412	Up	3.85e-06	5.39e-05
lnc-ARL6IP6-5	746	0	3	0.001	25.5366	14.6403	Up	0.00108424	0.0056873
lnc-SLC25A25-3	249	0	1	0.001	25.5024	14.6383	Up	0.046567	0.11633
lnc-ATXN7-10	747	0	3	0.001	25.5024	14.6383	Up	0.00108424	0.00567576
lnc-MAK16-7	249	0	1	0.001	25.5024	14.6383	Up	0.046567	0.10977
lnc-PCDH10-18	249	0	1	0.001	25.5024	14.6383	Up	0.046567	0.109477
POTEC	2243	0	9	0.001	25.4796	14.6371	Up	1.37e-08	4.19e-07
lnc-RDH5-1	1746	0	7	0.001	25.4586	14.6359	Up	5.88e-07	1.1e-05
lnc-AC006035.2-1	2245	0	9	0.001	25.4569	14.6358	Up	1.37e-08	4.33e-07
lnc-PHTF2-5	499	0	2	0.001	25.4513	14.6355	Up	0.0071056	0.0283828
lnc-OTOL1-3	749	0	3	0.001	25.4343	14.6345	Up	0.00108424	0.00595355
lnc-ANKRD37-2	1500	0	6	0.001	25.4004	14.6326	Up	3.85e-06	5.81e-05
lnc-NOTCH2NL-4	250	0	1	0.001	25.4004	14.6326	Up	0.046567	0.119011
lnc-RBMY1E-3	500	0	2	0.001	25.4004	14.6326	Up	0.0071056	0.0254351
lnc-KCNN2-1	751	0	3	0.001	25.3666	14.6306	Up	0.00108424	0.00566427
lnc-FAM132B-2	501	0	2	0.001	25.3497	14.6297	Up	0.0071056	0.027953
lnc-STBD1-2	1002	0	4	0.001	25.3497	14.6297	Up	0.000165443	0.00127132
lnc-MLANA-1	501	0	2	0.001	25.3497	14.6297	Up	0.0071056	0.0260741
lnc-RBFOX3-1	752	0	3	0.001	25.3328	14.6287	Up	0.00108424	0.00605229
lnc-DUSP4-1	752	0	3	0.001	25.3328	14.6287	Up	0.00108424	0.00603662
B3GNT4	1504	0	6	0.001	25.3328	14.6287	Up	3.85e-06	5.54e-05
lnc-DCTN2-2	1003	0	4	0.001	25.3244	14.6282	Up	0.000165443	0.00130981
lnc-PLGLB2-3	502	0	2	0.001	25.2992	14.6268	Up	0.0071056	0.0274919
lnc-GPR27-20	251	0	1	0.001	25.2992	14.6268	Up	0.046567	0.113912
lnc-AC007405.2.1-7	251	0	1	0.001	25.2992	14.6268	Up	0.046567	0.11124
lnc-RBP7-2	251	0	1	0.001	25.2992	14.6268	Up	0.046567	0.110789
lnc-METAP1-3	749	0	3	0.001	25.2656	14.6249	Up	0.00108424	0.00621359
lnc-C6orf70-9	2766	0	11	0.001	25.2534	14.6242	Up	3.19e-10	1.53e-08
lnc-CELF2-2	503	0	2	0.001	25.2489	14.6239	Up	0.0071056	0.0256989
lnc-SYNCRIP-7	755	0	3	0.001	25.2322	14.623	Up	0.00108424	0.00611847
lnc-RGPD6-1	755	0	3	0.001	25.2322	14.623	Up	0.00108424	0.00587274
lnc-BORA-25	1007	0	4	0.001	25.2238	14.6225	Up	0.000165443	0.00135901
lnc-HAND1-2	1763	0	7	0.001	25.2131	14.6219	Up	5.88e-07	1.18e-05
lnc-ARRDC4-5	756	0	3	0.001	25.1988	14.6211	Up	0.00108424	0.00600638
lnc-OTP-2	3025	0	12	0.001	25.1905	14.6206	Up	4.86e-11	2.67e-09
lnc-CPXCR1-2	1513	0	6	0.001	25.1821	14.6201	Up	3.85e-06	5.41e-05
lnc-FUBP1-4	757	0	3	0.001	25.1655	14.6192	Up	0.00108424	0.00570431
lnc-ADCYAP1-4	505	0	2	0.001	25.1489	14.6182	Up	0.0071056	0.0271098
lnc-MUC15-3	505	0	2	0.001	25.1489	14.6182	Up	0.0071056	0.025311
lnc-POM121L12-7	505	0	2	0.001	25.1489	14.6182	Up	0.0071056	0.0252251
lnc-FSHB-8	1263	0	5	0.001	25.1389	14.6176	Up	2.52e-05	0.000261403
lnc-CSRP2-1	1264	0	5	0.001	25.119	14.6165	Up	2.52e-05	0.000269403
TRAIP	2024	0	8	0.001	25.0992	14.6154	Up	8.97e-08	2.34e-06
lnc-AC132216.1-5	253	0	1	0.001	25.0992	14.6154	Up	0.046567	0.124219
lnc-MON2-6	506	0	2	0.001	25.0992	14.6154	Up	0.0071056	0.0282661
lnc-AL162389.1-8	1012	0	4	0.001	25.0992	14.6154	Up	0.000165443	0.00131249
lnc-CCDC90A-11	253	0	1	0.001	25.0992	14.6154	Up	0.046567	0.117936
ZNF787	2024	0	8	0.001	25.0992	14.6154	Up	8.97e-08	2.23e-06
lnc-AC145676.2.1-9	759	0	3	0.001	25.0992	14.6154	Up	0.00108424	0.00587438
lnc-ABCA13-1	759	0	3	0.001	25.0992	14.6154	Up	0.00108424	0.00573392
lnc-ZPLD1-1	506	0	2	0.001	25.0992	14.6154	Up	0.0071056	0.0252043
lnc-SENP6-2	528	0	2	0.001	25.0992	14.6154	Up	0.0071056	0.0251674
lnc-C5orf50-1	1013	0	4	0.001	25.0744	14.6139	Up	0.000165443	0.00131952
lnc-ZCCHC17-8	507	0	2	0.001	25.0497	14.6125	Up	0.0071056	0.027309
SYF2	1777	0	7	0.001	25.0144	14.6105	Up	5.88e-07	1.17e-05
lnc-MRPS16-1	1096	0	3	0.001	25.0004	14.6097	Up	0.00108424	0.00560976
lnc-SLTM-4	763	0	3	0.001	24.9676	14.6078	Up	0.00108424	0.00594259
ATP6AP2	2036	0	8	0.001	24.9513	14.6068	Up	8.97e-08	2.31e-06
lnc-SLITRK5-28	509	0	2	0.001	24.9513	14.6068	Up	0.0071056	0.0262433
lnc-CELF4-16	509	0	2	0.001	24.9513	14.6068	Up	0.0071056	0.0262082
lnc-CUL7-3	509	0	2	0.001	24.9513	14.6068	Up	0.0071056	0.0252089
lnc-TEFM-10	1967	0	3	0.001	24.9349	14.6059	Up	0.00108424	0.00587685
lnc-LDB1-3	255	0	1	0.001	24.9023	14.604	Up	0.046567	0.12529
lnc-BBOX1-8	766	0	3	0.001	24.8698	14.6021	Up	0.00108424	0.00576227
lnc-CYP2J2-1	767	0	3	0.001	24.8374	14.6002	Up	0.00108424	0.00603055
lnc-PPHLN1-4	256	0	1	0.001	24.8051	14.5983	Up	0.046567	0.120025
MRPS34	1024	0	4	0.001	24.8051	14.5983	Up	0.000165443	0.00131142
lnc-ORC4-3	1024	0	4	0.001	24.8051	14.5983	Up	0.000165443	0.00128691
IFNA21	1024	0	4	0.001	24.8051	14.5983	Up	0.000165443	0.00126629
lnc-DDHD2-1	256	0	1	0.001	24.8051	14.5983	Up	0.046567	0.11309
MTFR2	1793	0	7	0.001	24.7912	14.5975	Up	5.88e-07	1.18e-05
MAL2	2819	0	11	0.001	24.7787	14.5968	Up	3.19e-10	1.53e-08
lnc-AC091132.1-1	769	0	3	0.001	24.7728	14.5965	Up	0.00108424	0.00618794
GCSH	1538	0	6	0.001	24.7728	14.5965	Up	3.85e-06	5.73e-05
INGX	769	0	3	0.001	24.7728	14.5965	Up	0.00108424	0.00575437
SMCP	770	0	3	0.001	24.7406	14.5946	Up	0.00108424	0.00627303
TARP	1027	0	4	0.001	24.7326	14.5941	Up	0.000165443	0.00130687
lnc-NAT2-1	2054	0	8	0.001	24.7326	14.5941	Up	8.97e-08	2.2e-06
lnc-PID1-3	257	0	1	0.001	24.7085	14.5927	Up	0.046567	0.11449
lnc-FAM131B-2	1800	0	7	0.001	24.6948	14.5919	Up	5.88e-07	1.16e-05
lnc-TMEM201-2	515	0	2	0.001	24.6606	14.5899	Up	0.0071056	0.0279388
lnc-ABCC5-1	515	0	2	0.001	24.6606	14.5899	Up	0.0071056	0.0275608
lnc-TMEM5-1	515	0	2	0.001	24.6606	14.5899	Up	0.0071056	0.0270007
lnc-C11orf41-2	773	0	3	0.001	24.6446	14.589	Up	0.00108424	0.00590497
lnc-RINT1-3	2578	0	10	0.001	24.6319	14.5882	Up	2.09e-09	8.24e-08
lnc-NUDT4-5	1289	0	5	0.001	24.6319	14.5882	Up	2.52e-05	0.000269032
lnc-SLC5A7-1	258	0	1	0.001	24.6128	14.5871	Up	0.046567	0.124262
lnc-TMEM168-2	1032	0	4	0.001	24.6128	14.5871	Up	0.000165443	0.00126529
lnc-MKRN3-7	606	0	2	0.001	24.6128	14.5871	Up	0.0071056	0.0258438
lnc-TASP1-9	1032	0	4	0.001	24.6128	14.5871	Up	0.000165443	0.00123289
KIAA0101	1549	0	6	0.001	24.5969	14.5862	Up	3.85e-06	5.3e-05
lnc-ZNF445-3	517	0	2	0.001	24.5652	14.5843	Up	0.0071056	0.0276717
lnc-AC114772.1-5	517	0	2	0.001	24.5652	14.5843	Up	0.0071056	0.0267252
lnc-ZDHHC15-2	517	0	2	0.001	24.5652	14.5843	Up	0.0071056	0.0262934
lnc-COG5-5	259	0	1	0.001	24.5177	14.5815	Up	0.046567	0.121057
lnc-C20orf7-3	773	0	3	0.001	24.5177	14.5815	Up	0.00108424	0.00612204
lnc-AC073416.2-8	259	0	1	0.001	24.5177	14.5815	Up	0.046567	0.114534
lnc-LINGO2-5	777	0	3	0.001	24.5177	14.5815	Up	0.00108424	0.00565664
NDUFB3	778	0	3	0.001	24.4862	14.5797	Up	0.00108424	0.00591579
lnc-DMRTA1-8	778	0	3	0.001	24.4862	14.5797	Up	0.00108424	0.00585145
lnc-SS18L2-2	2134	0	9	0.001	24.4757	14.5791	Up	1.37e-08	4.37e-07
lnc-ID4-1	519	0	2	0.001	24.4705	14.5788	Up	0.0071056	0.0284444
lnc-CLCC1-2	519	0	2	0.001	24.4705	14.5788	Up	0.0071056	0.028269
lnc-AC005493.1-1	1557	0	6	0.001	24.4705	14.5788	Up	3.85e-06	5.72e-05
lnc-PHF17-6	519	0	2	0.001	24.4705	14.5788	Up	0.0071056	0.0268321
lnc-MBOAT2-2	1557	0	6	0.001	24.4705	14.5788	Up	3.85e-06	5.33e-05
KRTAP17-1	779	0	3	0.001	24.4548	14.5778	Up	0.00108424	0.00635569
TAPBPL	1818	0	7	0.001	24.4503	14.5776	Up	5.88e-07	1.16e-05
lnc-UBE2B-1	520	0	2	0.001	24.4234	14.576	Up	0.0071056	0.0275774
lnc-EVC-3	260	0	1	0.001	24.4234	14.576	Up	0.046567	0.119082
lnc-UCHL5-6	780	0	3	0.001	24.4234	14.576	Up	0.00108424	0.00599866
lnc-DTNBP1-4	520	0	2	0.001	24.4234	14.576	Up	0.0071056	0.0269875
lnc-KRT80-2	520	0	2	0.001	24.4234	14.576	Up	0.0071056	0.0263918
lnc-OCA2-8	780	0	3	0.001	24.4234	14.576	Up	0.00108424	0.00569579
lnc-MAPK7-2	520	0	2	0.001	24.4234	14.576	Up	0.0071056	0.0253553
lnc-SLC39A10-8	260	0	1	0.001	24.4234	14.576	Up	0.046567	0.10949
lnc-BASP1-11	1301	0	5	0.001	24.4047	14.5749	Up	2.52e-05	0.000287052
lnc-POLR2B-3	783	0	3	0.001	24.3299	14.5704	Up	0.00108424	0.00603489
lnc-PAK1-3	261	0	1	0.001	24.3299	14.5704	Up	0.046567	0.118362
lnc-FYTTD1-3	783	0	3	0.001	24.3299	14.5704	Up	0.00108424	0.00589501
LOC100506675	522	0	2	0.001	24.3299	14.5704	Up	0.0071056	0.0254846
lnc-LPHN2-10	522	0	2	0.001	24.3299	14.5704	Up	0.0071056	0.0253764
lnc-STOML3-8	522	0	2	0.001	24.3299	14.5704	Up	0.0071056	0.0252691
lnc-PLA2G2E-1	1306	0	5	0.001	24.3112	14.5693	Up	2.52e-05	0.000257341
lnc-FAIM-3	2090	0	8	0.001	24.3066	14.5691	Up	8.97e-08	2.25e-06
DDX19B	1829	0	7	0.001	24.3033	14.5689	Up	5.88e-07	1.11e-05
lnc-PPEF1-3	784	0	3	0.001	24.2988	14.5686	Up	0.00108424	0.00621912
lnc-CCDC82-10	523	0	2	0.001	24.2833	14.5677	Up	0.0071056	0.0272118
lnc-BTG3-6	523	0	2	0.001	24.2833	14.5677	Up	0.0071056	0.0267278
lnc-ZNF417-1	523	0	2	0.001	24.2833	14.5677	Up	0.0071056	0.0251536
lnc-RASSF6-1	1047	0	4	0.001	24.2601	14.5663	Up	0.000165443	0.00120983
lnc-PACRGL-12	2033	0	5	0.001	24.2555	14.566	Up	2.52e-05	0.000259391
lnc-USP12-3	786	0	3	0.001	24.237	14.5649	Up	0.00108424	0.00582869
lnc-NSRP1-4	2882	0	11	0.001	24.237	14.5649	Up	3.19e-10	1.46e-08
ZNF763	2623	0	10	0.001	24.2093	14.5633	Up	2.09e-09	7.94e-08
lnc-RP4-604K5.1.1-13	787	0	3	0.001	24.2062	14.5631	Up	0.00108424	0.00580772
PDIA3P1	2099	0	8	0.001	24.2024	14.5629	Up	8.97e-08	2.18e-06
lnc-LACTB-1	788	0	3	0.001	24.1755	14.5613	Up	0.00108424	0.00557399
lnc-OTUD6B-6	263	0	1	0.001	24.1448	14.5594	Up	0.046567	0.125246
lnc-LRGUK-3	526	0	2	0.001	24.1448	14.5594	Up	0.0071056	0.0275525
SNAPIN	1052	0	4	0.001	24.1448	14.5594	Up	0.000165443	0.00124294
lnc-INSM1-2	1315	0	5	0.001	24.1448	14.5594	Up	2.52e-05	0.000261333
lnc-CXADR-5	790	0	3	0.001	24.1143	14.5576	Up	0.00108424	0.00563537
lnc-C6orf201-2	3690	0	14	0.001	24.0925	14.5563	Up	1.13e-12	8.75e-11
OR51B2	1055	0	4	0.001	24.0762	14.5553	Up	0.000165443	0.00121789
lnc-AC073416.2-1	528	0	2	0.001	24.0534	14.554	Up	0.0071056	0.0277443
lnc-GNRH1-1	528	0	2	0.001	24.0534	14.554	Up	0.0071056	0.0271876
lnc-SGPL1-3	264	0	1	0.001	24.0534	14.554	Up	0.046567	0.112927
lnc-RPS3A-2	528	0	2	0.001	24.0534	14.554	Up	0.0071056	0.0252297
lnc-ZNF629-2	2114	0	8	0.001	24.0306	14.5526	Up	8.97e-08	2.17e-06
lnc-ZDHHC21-2	529	0	2	0.001	24.0079	14.5512	Up	0.0071056	0.0268662
lnc-ENPP1-3	2117	0	8	0.001	23.9966	14.5505	Up	8.97e-08	2.16e-06
FUCA1	2117	0	8	0.001	23.9966	14.5505	Up	8.97e-08	2.16e-06
lnc-AP3S1-12	265	0	1	0.001	23.9626	14.5485	Up	0.046567	0.124882
lnc-FOXD4L5-1	530	0	2	0.001	23.9626	14.5485	Up	0.0071056	0.0284916
FAM86B3P	1643	0	4	0.001	23.9626	14.5485	Up	0.000165443	0.00135843
lnc-CERKL-3	265	0	1	0.001	23.9626	14.5485	Up	0.046567	0.117506
IBSP	1591	0	6	0.001	23.9476	14.5476	Up	3.85e-06	5.36e-05
lnc-METTL20-2	1326	0	5	0.001	23.9445	14.5474	Up	2.52e-05	0.000286379
lnc-NOM1-1	531	0	2	0.001	23.9175	14.5458	Up	0.0071056	0.0260716
lnc-FGF14-2	531	0	2	0.001	23.9175	14.5458	Up	0.0071056	0.0251559
lnc-ZNF605-4	797	0	3	0.001	23.9025	14.5449	Up	0.00108424	0.00602017
lnc-RUNDC3B-3	797	0	3	0.001	23.9025	14.5449	Up	0.00108424	0.00584493
lnc-NPHS2-4	532	0	2	0.001	23.8725	14.5431	Up	0.0071056	0.0273308
lnc-EGR4-1	1064	0	4	0.001	23.8725	14.5431	Up	0.000165443	0.00126429
[truncated: 36,708 more rows]
