# Supplementary material for: Serum exosomal long noncoding RNAs lnc-FAM72D-3 and lnc-EPC1-4 as diagnostic biomarkers for hepatocellular carcinoma
Source: Aging (Albany NY). 2020 Jun 18;12(12):11843–63. doi: 10.18632/aging.103355 (PMC7343450; doi:10.18632/aging.103355)
Supplement: Supplementary Table 4 [file aging-12-103355-s004..xls]

## Sheet: aging-12-103355-s005
Supplemental table 4. The differentially expressed lncRNA in Normal group vs. Liver cancer group.
geneID	geneLength	N-Expression	T-Expression	N-RPKM	T-RPKM	log2 Ratio(T/N)	Up-Down-Regulation(T/N)	P-value	FDR
lnc-FLOT2-2	467	0	118	0.001	334.79	18.3529	Up	3.39e-40	1.17e-37
lnc-RHOD-2	999	0	240	0.001	318.312	18.2801	Up	5.72e-81	9.18e-78
lnc-SCARF1-2	297	0	71	0.001	316.745	18.273	Up	1.73e-24	1.64e-22
lnc-GGCX-5	294	0	63	0.001	283.923	18.1151	Up	8.16e-22	6.03e-20
lnc-RHOF-2	284	0	58	0.001	270.593	18.0458	Up	3.83e-20	2.3e-18
lnc-ZFPM2-3	216	0	41	0.001	251.5	17.9402	Up	1.84e-14	5.25e-13
lnc-GTF2F2-3	383	0	68	0.001	235.243	17.8438	Up	1.74e-23	1.5e-21
lnc-THSD7B-1	215	0	38	0.001	234.181	17.8373	Up	1.85e-13	4.56e-12
lnc-DUXA-1	318	0	54	0.001	224.996	17.7795	Up	8.31e-19	4.3e-17
lnc-VWA2-2	250	0	41	0.001	217.296	17.7293	Up	1.84e-14	5.27e-13
lnc-ST3GAL4-2	296	0	48	0.001	214.861	17.713	Up	8.41e-17	3.37e-15
lnc-RAD54L2-2	570	0	92	0.001	213.855	17.7063	Up	1.66e-31	3.01e-29
lnc-JAK1-8	226	0	36	0.001	211.058	17.6873	Up	8.62e-13	1.91e-11
lnc-NR2E1-2	432	0	62	0.001	190.158	17.5368	Up	1.76e-21	1.24e-19
lnc-CECR6-2	328	0	47	0.001	189.859	17.5346	Up	1.82e-16	6.9e-15
lnc-AMPH-3	292	0	41	0.001	186.041	17.5053	Up	1.84e-14	5.27e-13
lnc-GIMAP5-3	560	0	78	0.001	184.55	17.4937	Up	7.92e-27	9.36e-25
lnc-NBPF9-3	506	0	69	0.001	180.678	17.4631	Up	8.06e-24	7.19e-22
lnc-RBCK1-2	363	0	49	0.001	178.853	17.4484	Up	3.9e-17	1.63e-15
lnc-C14orf162-2	452	0	61	0.001	178.813	17.4481	Up	3.8e-21	2.54e-19
lnc-OTX1-4	367	0	49	0.001	176.904	17.4326	Up	3.9e-17	1.63e-15
lnc-RBM47-2	446	0	58	0.001	172.306	17.3946	Up	3.83e-20	2.29e-18
lnc-GXYLT2-7	347	0	45	0.001	171.827	17.3906	Up	8.46e-16	2.89e-14
lnc-BLCAP-6	226	0	29	0.001	170.019	17.3753	Up	1.88e-10	2.94e-09
lnc-NOP58-4	462	0	57	0.001	163.471	17.3187	Up	8.26e-20	4.8e-18
lnc-FAM27B-24	584	0	72	0.001	163.353	17.3176	Up	8.02e-25	7.88e-23
lnc-BARHL2-1	915	0	112	0.001	162.183	17.3073	Up	3.43e-38	9.95e-36
lnc-NCOA3-16	213	0	26	0.001	161.734	17.3033	Up	1.89e-09	2.5e-08
lnc-KCNC3-2	307	0	37	0.001	159.687	17.2849	Up	3.99e-13	9.33e-12
lnc-URI1-4	415	0	48	0.001	153.25	17.2255	Up	8.41e-17	3.37e-15
lnc-EML5-3	228	0	26	0.001	151.093	17.2051	Up	1.89e-09	2.49e-08
lnc-RP11-428C6.1.1-1	1075	0	122	0.001	150.369	17.1981	Up	1.56e-41	5.9e-39
lnc-STRBP-9	588	0	66	0.001	148.722	17.1823	Up	8.11e-23	6.54e-21
lnc-METTL14-2	241	0	27	0.001	148.441	17.1795	Up	8.78e-10	1.23e-08
lnc-FNDC1-3	845	0	93	0.001	145.826	17.1539	Up	7.68e-32	1.43e-29
OR2L2	1134	0	123	0.001	143.714	17.1328	Up	7.23e-42	2.8e-39
LSP1P3	444	0	48	0.001	143.24	17.1281	Up	8.41e-17	3.39e-15
lnc-RP11-90J19.1.1-3	391	0	42	0.001	142.325	17.1188	Up	8.51e-15	2.54e-13
lnc-BOLA2B-2	569	0	61	0.001	142.045	17.116	Up	3.8e-21	2.55e-19
lnc-NCOA3-18	884	0	93	0.001	139.392	17.0888	Up	7.68e-32	1.44e-29
lnc-C11orf36-3	783	0	80	0.001	135.374	17.0466	Up	1.7e-27	2.18e-25
lnc-FNDC1-5	468	0	46	0.001	130.232	16.9907	Up	3.92e-16	1.42e-14
lnc-GBE1-10	288	0	28	0.001	128.817	16.975	Up	4.06e-10	5.95e-09
lnc-ZNF716-7	334	0	32	0.001	126.944	16.9538	Up	1.87e-11	3.36e-10
lnc-MPDZ-8	293	0	28	0.001	126.619	16.9501	Up	4.06e-10	5.99e-09
lnc-RCOR2-6	284	0	27	0.001	125.966	16.9427	Up	8.78e-10	1.22e-08
lnc-SFPQ-6	299	0	28	0.001	124.078	16.9209	Up	4.06e-10	5.94e-09
lnc-PTGIR-2	560	0	52	0.001	123.033	16.9087	Up	3.87e-18	1.83e-16
lnc-AC073416.2-2	324	0	30	0.001	122.683	16.9046	Up	8.72e-11	1.43e-09
lnc-ABI3-1	465	0	43	0.001	122.524	16.9027	Up	3.94e-15	1.23e-13
lnc-CYP26B1-3	411	0	38	0.001	122.504	16.9025	Up	1.85e-13	4.55e-12
lnc-TRIM26-3	634	0	58	0.001	121.212	16.8872	Up	3.83e-20	2.3e-18
lnc-AC027763.2.1-5	296	0	27	0.001	120.859	16.883	Up	8.78e-10	1.22e-08
lnc-BLCAP-5	242	0	22	0.001	120.452	16.8781	Up	4.11e-08	4.26e-07
lnc-CTTNBP2-6	874	0	79	0.001	119.763	16.8698	Up	3.67e-27	4.48e-25
lnc-RASA1-18	313	0	28	0.001	118.528	16.8549	Up	4.06e-10	5.93e-09
lnc-AIFM2-3	291	0	26	0.001	118.383	16.8531	Up	1.89e-09	2.5e-08
lnc-C9orf38-1	638	0	57	0.001	118.375	16.853	Up	8.26e-20	4.8e-18
lnc-CSNK1A1L-2	307	0	27	0.001	116.529	16.8303	Up	8.78e-10	1.22e-08
lnc-SEMA3D-4	332	0	29	0.001	115.736	16.8205	Up	1.88e-10	2.93e-09
lnc-RUNDC1-2	402	0	35	0.001	115.358	16.8158	Up	1.86e-12	3.94e-11
PSENEN	834	0	72	0.001	114.386	16.8036	Up	8.02e-25	7.86e-23
lnc-FILIP1-3	330	0	28	0.001	112.422	16.7786	Up	4.06e-10	5.95e-09
lnc-C8orf4-1	531	0	45	0.001	112.286	16.7768	Up	8.46e-16	2.9e-14
lnc-CD180-9	959	0	81	0.001	111.911	16.772	Up	7.87e-28	1.05e-25
lnc-FAM103A1-2	452	0	38	0.001	111.392	16.7653	Up	1.85e-13	4.56e-12
lnc-KBTBD4-2	298	0	25	0.001	111.156	16.7622	Up	4.09e-09	5.04e-08
OR10Z1	942	0	79	0.001	111.118	16.7617	Up	3.67e-27	4.45e-25
lnc-FOXP4-2	743	0	62	0.001	110.563	16.7545	Up	1.76e-21	1.24e-19
lnc-FAM101B-1	887	0	74	0.001	110.539	16.7542	Up	1.72e-25	1.79e-23
lnc-NPY5R-9	336	0	28	0.001	110.414	16.7526	Up	4.06e-10	5.94e-09
lnc-SNRPD1-2	447	0	37	0.001	109.673	16.7429	Up	3.99e-13	9.29e-12
lnc-CNBP-1	258	0	21	0.001	107.847	16.7186	Up	8.88e-08	8.56e-07
lnc-IL1R2-1	432	0	35	0.001	107.347	16.7119	Up	1.86e-12	3.95e-11
lnc-PEBP4-2	674	0	54	0.001	106.155	16.6958	Up	8.31e-19	4.29e-17
lnc-PLXDC2-6	300	0	24	0.001	105.998	16.6937	Up	8.83e-09	1.02e-07
lnc-PRMT5-1	328	0	26	0.001	105.028	16.6804	Up	1.89e-09	2.48e-08
lnc-ZNF514-4	379	0	30	0.001	104.879	16.6784	Up	8.72e-11	1.42e-09
lnc-SULT1A4-2	292	0	23	0.001	104.364	16.6713	Up	1.91e-08	2.1e-07
REREP3	804	0	63	0.001	103.823	16.6638	Up	8.16e-22	6e-20
lnc-MALT1-6	309	0	24	0.001	102.911	16.651	Up	8.83e-09	1.03e-07
lnc-RASGRP2-2	247	0	19	0.001	101.921	16.6371	Up	4.14e-07	3.52e-06
lnc-RGS9-4	432	0	33	0.001	101.213	16.627	Up	8.67e-12	1.65e-10
lnc-CCDC37-1	682	0	52	0.001	101.024	16.6243	Up	3.87e-18	1.84e-16
lnc-ANKRD46-4	210	0	16	0.001	100.95	16.6233	Up	4.16e-06	2.85e-05
lnc-CPLX1-9	239	0	18	0.001	99.7888	16.6066	Up	8.94e-07	7.06e-06
lnc-TUBA3C-9	442	0	33	0.001	98.9234	16.594	Up	8.67e-12	1.67e-10
lnc-TMEM123-2	550	0	41	0.001	98.7708	16.5918	Up	1.84e-14	5.27e-13
DUSP23	685	0	51	0.001	98.6477	16.59	Up	8.36e-18	3.79e-16
lnc-BHLHE40-1	230	0	17	0.001	97.9328	16.5795	Up	1.93e-06	1.42e-05
lnc-CLYBL-2	420	0	31	0.001	97.7957	16.5775	Up	4.04e-11	6.94e-10
lnc-IL15RA-4	545	0	40	0.001	97.2458	16.5693	Up	3.97e-14	1.07e-12
lnc-RPAP2-2	586	0	43	0.001	97.225	16.569	Up	3.94e-15	1.23e-13
lnc-KIAA0195-1	372	0	27	0.001	96.1674	16.5533	Up	8.78e-10	1.23e-08
lnc-TASP1-12	473	0	34	0.001	95.2412	16.5393	Up	4.02e-12	8.03e-11
lnc-ANO3-2	1926	0	138	0.001	94.9358	16.5347	Up	7.02e-47	3.47e-44
lnc-FBXL8-1	490	0	35	0.001	94.641	16.5302	Up	1.86e-12	3.94e-11
lnc-COX10-6	647	0	46	0.001	94.2021	16.5235	Up	3.92e-16	1.42e-14
OR13C3	1044	0	74	0.001	93.9158	16.5191	Up	1.72e-25	1.8e-23
lnc-PRNT-1	466	0	33	0.001	93.8286	16.5177	Up	8.67e-12	1.66e-10
lnc-NMBR-8	453	0	32	0.001	93.5964	16.5142	Up	1.87e-11	3.39e-10
lnc-SH3BGRL3-2	453	0	32	0.001	93.5964	16.5142	Up	1.87e-11	3.36e-10
lnc-MIXL1-4	269	0	19	0.001	93.5855	16.514	Up	4.14e-07	3.49e-06
lnc-CD83-5	1141	0	80	0.001	92.8991	16.5034	Up	1.7e-27	2.19e-25
lnc-SMUG1-9	796	0	55	0.001	91.5497	16.4823	Up	3.85e-19	2.09e-17
lnc-CARD14-2	711	0	49	0.001	91.3132	16.4785	Up	3.9e-17	1.63e-15
lnc-EXD2-2	494	0	34	0.001	91.1925	16.4766	Up	4.02e-12	8.03e-11
lnc-VAV3-10	554	0	38	0.001	90.8827	16.4717	Up	1.85e-13	4.55e-12
lnc-DSCR4-4	321	0	22	0.001	90.8082	16.4705	Up	4.11e-08	4.23e-07
lnc-TRIM32-3	774	0	53	0.001	90.7282	16.4693	Up	1.79e-18	8.82e-17
FAM212A	1040	0	71	0.001	90.4549	16.4649	Up	1.73e-24	1.65e-22
lnc-RPS6KA1-1	266	0	18	0.001	89.6599	16.4522	Up	8.94e-07	7.07e-06
lnc-MAPK7-2	520	0	35	0.001	89.1809	16.4444	Up	1.86e-12	3.91e-11
lnc-PANK3-1	550	0	37	0.001	89.1346	16.4437	Up	3.99e-13	9.32e-12
lnc-C8orf34-6	558	0	37	0.001	87.8567	16.4229	Up	3.99e-13	9.31e-12
lnc-AC233263.1-4	717	0	47	0.001	86.8532	16.4063	Up	1.82e-16	6.92e-15
lnc-DEFB116-1	460	0	30	0.001	86.4113	16.3989	Up	8.72e-11	1.43e-09
lnc-ADRA2C-1	322	0	21	0.001	86.4113	16.3989	Up	8.88e-08	8.65e-07
lnc-PRMT10-1	568	0	37	0.001	86.3099	16.3972	Up	3.99e-13	9.29e-12
lnc-LEFTY1-2	722	0	47	0.001	86.2517	16.3963	Up	1.82e-16	6.91e-15
lnc-RP1-170O19.17.1-3	614	0	39	0.001	84.1596	16.3608	Up	8.57e-14	2.21e-12
lnc-CRYL1-1	1343	0	85	0.001	83.8591	16.3557	Up	3.62e-29	5.46e-27
lnc-CELA1-2	494	0	31	0.001	83.1461	16.3434	Up	4.04e-11	6.94e-10
OR56A5	942	0	59	0.001	82.9867	16.3406	Up	1.77e-20	1.09e-18
lnc-TM6SF1-1	369	0	23	0.001	82.5864	16.3336	Up	1.91e-08	2.09e-07
lnc-GDPD3-2	498	0	31	0.001	82.4783	16.3317	Up	4.04e-11	6.97e-10
lnc-IRF8-4	355	0	22	0.001	82.111	16.3253	Up	4.11e-08	4.27e-07
lnc-RPS27L-5	226	0	14	0.001	82.078	16.3247	Up	1.94e-05	0.000113673
lnc-C20orf85-2	325	0	20	0.001	81.5368	16.3152	Up	1.92e-07	1.75e-06
lnc-NCF4-2	634	0	39	0.001	81.5047	16.3146	Up	8.57e-14	2.2e-12
lnc-MRPS6-6	2253	0	138	0.001	81.1568	16.3084	Up	7.02e-47	3.43e-44
lnc-HRASLS5-2	311	0	19	0.001	80.9469	16.3047	Up	4.14e-07	3.51e-06
lnc-MS4A6E-1	727	0	44	0.001	80.191	16.2912	Up	1.83e-15	5.97e-14
lnc-S100A6-1	298	0	18	0.001	80.032	16.2883	Up	8.94e-07	7.11e-06
lnc-ATAD5-4	862	0	52	0.001	79.9288	16.2864	Up	3.87e-18	1.84e-16
lnc-COMMD6-5	284	0	17	0.001	79.3118	16.2752	Up	1.93e-06	1.41e-05
lnc-CALML4-5	235	0	14	0.001	78.9346	16.2684	Up	1.94e-05	0.000113406
lnc-RPS24-10	1175	0	70	0.001	78.9346	16.2684	Up	3.74e-24	3.44e-22
lnc-TCL1B-5	725	0	43	0.001	78.5846	16.262	Up	3.94e-15	1.24e-13
lnc-SYNE2-4	306	0	18	0.001	77.9396	16.2501	Up	8.94e-07	7.14e-06
lnc-MAP3K5-1	391	0	23	0.001	77.9396	16.2501	Up	1.91e-08	2.1e-07
lnc-DCAF17-1	239	0	14	0.001	77.6135	16.244	Up	1.94e-05	0.000113421
lnc-SIRT1-5	940	0	55	0.001	77.5251	16.2424	Up	3.85e-19	2.09e-17
lnc-KB-1980E6.3.1-4	975	0	57	0.001	77.46	16.2412	Up	8.26e-20	4.81e-18
lnc-TYW5-5	483	0	28	0.001	76.8101	16.229	Up	4.06e-10	5.97e-09
lnc-SLC27A4-3	901	0	52	0.001	76.4691	16.2226	Up	3.87e-18	1.84e-16
lnc-NUAK1-2	312	0	18	0.001	76.4408	16.2221	Up	8.94e-07	7.14e-06
lnc-ROR1-1	958	0	55	0.001	76.0684	16.215	Up	3.85e-19	2.09e-17
lnc-RBMS1-9	279	0	16	0.001	75.9842	16.2134	Up	4.16e-06	2.84e-05
lnc-GPR97-1	558	0	32	0.001	75.9842	16.2134	Up	1.87e-11	3.37e-10
lnc-ULBP1-2	596	0	34	0.001	75.5857	16.2058	Up	4.02e-12	8.06e-11
lnc-PAPPA2-4	580	0	33	0.001	75.3864	16.202	Up	8.67e-12	1.66e-10
C10orf35	1076	0	61	0.001	75.1147	16.1968	Up	3.8e-21	2.56e-19
lnc-CTR9-1	441	0	25	0.001	75.1119	16.1968	Up	4.09e-09	5.06e-08
lnc-SMAD5-1	636	0	36	0.001	74.9985	16.1946	Up	8.62e-13	1.91e-11
lnc-NTN1-2	481	0	27	0.001	74.3748	16.1825	Up	8.78e-10	1.22e-08
CEACAM18	1125	0	63	0.001	74.1985	16.1791	Up	8.16e-22	6.01e-20
lnc-NTHL1-1	929	0	52	0.001	74.1643	16.1784	Up	3.87e-18	1.84e-16
lnc-MPDZ-3	645	0	36	0.001	73.952	16.1743	Up	8.62e-13	1.91e-11
lnc-TIGD1L2-4	610	0	34	0.001	73.851	16.1723	Up	4.02e-12	8.06e-11
lnc-GOLIM4-1	306	0	17	0.001	73.6096	16.1676	Up	1.93e-06	1.41e-05
lnc-RPL22-1	743	0	41	0.001	73.1143	16.1579	Up	1.84e-14	5.26e-13
lnc-GLT1D1-8	599	0	33	0.001	72.9952	16.1555	Up	8.67e-12	1.66e-10
lnc-FRA10AC1-1	418	0	23	0.001	72.9052	16.1537	Up	1.91e-08	2.09e-07
lnc-PPM1D-3	291	0	16	0.001	72.8508	16.1527	Up	4.16e-06	2.83e-05
lnc-CRYBA4-5	473	0	26	0.001	72.8315	16.1523	Up	1.89e-09	2.5e-08
lnc-GUF1-8	273	0	15	0.001	72.8007	16.1517	Up	8.99e-06	5.69e-05
lnc-SCN7A-3	383	0	21	0.001	72.6487	16.1486	Up	8.88e-08	8.58e-07
lnc-ANKRD36C-7	238	0	13	0.001	72.3725	16.1432	Up	4.19e-05	0.000223216
lnc-WAC-1	440	0	24	0.001	72.2713	16.1411	Up	8.83e-09	1.03e-07
lnc-RPS4Y2-3	312	0	17	0.001	72.1941	16.1396	Up	1.93e-06	1.43e-05
lnc-ASH1L-3	257	0	14	0.001	72.1776	16.1393	Up	1.94e-05	0.000111864
lnc-NFKBIZ-3	588	0	32	0.001	72.1074	16.1379	Up	1.87e-11	3.37e-10
lnc-UGGT1-2	295	0	16	0.001	71.863	16.133	Up	4.16e-06	2.85e-05
lnc-SERPINI1-4	277	0	15	0.001	71.7495	16.1307	Up	8.99e-06	5.63e-05
lnc-KIF16B-3	833	0	45	0.001	71.5772	16.1272	Up	8.46e-16	2.89e-14
lnc-TUSC3-3	408	0	22	0.001	71.4447	16.1245	Up	4.11e-08	4.27e-07
lnc-CNST-4	427	0	23	0.001	71.3686	16.123	Up	1.91e-08	2.1e-07
lnc-IMMP1L-3	316	0	17	0.001	71.2802	16.1212	Up	1.93e-06	1.4e-05
TMEM171	1266	0	68	0.001	71.1676	16.1189	Up	1.74e-23	1.51e-21
lnc-CHMP2A-1	447	0	24	0.001	71.1395	16.1184	Up	8.83e-09	1.03e-07
lnc-MSH6-2	1174	0	63	0.001	71.1017	16.1176	Up	8.16e-22	6.02e-20
lnc-CXCL16-2	597	0	32	0.001	71.0204	16.1159	Up	1.87e-11	3.38e-10
lnc-MYO15B-4	656	0	35	0.001	70.6922	16.1093	Up	1.86e-12	3.92e-11
lnc-UCHL5-2	396	0	21	0.001	70.2638	16.1005	Up	8.88e-08	8.54e-07
lnc-PDGFC-1	322	0	17	0.001	69.952	16.0941	Up	1.93e-06	1.43e-05
lnc-GPR151-1	512	0	27	0.001	69.8717	16.0924	Up	8.78e-10	1.22e-08
lnc-C10orf136-4	498	0	26	0.001	69.1753	16.078	Up	1.89e-09	2.48e-08
lnc-EMP1-5	345	0	18	0.001	69.1291	16.077	Up	8.94e-07	7.09e-06
KRT19P2	575	0	30	0.001	69.1291	16.077	Up	8.72e-11	1.42e-09
lnc-ADCY1-2	404	0	21	0.001	68.8724	16.0716	Up	8.88e-08	8.63e-07
lnc-JOSD1-1	1080	0	56	0.001	68.7023	16.0681	Up	1.78e-19	1.01e-17
lnc-CELA3A-1	4026	0	207	0.001	68.1246	16.0559	Up	6.11e-70	6.7e-67
lnc-GPATCH4-1	974	0	50	0.001	68.0171	16.0536	Up	1.81e-17	7.94e-16
lnc-MEOX1-3	760	0	39	0.001	67.9921	16.0531	Up	8.57e-14	2.2e-12
lnc-BAG3-5	294	0	15	0.001	67.6007	16.0448	Up	8.99e-06	5.65e-05
lnc-TMEM220-1	667	0	34	0.001	67.5399	16.0435	Up	4.02e-12	8.1e-11
lnc-ELAVL4-1	314	0	16	0.001	67.5146	16.0429	Up	4.16e-06	2.86e-05
lnc-NXPH2-11	295	0	15	0.001	67.3715	16.0399	Up	8.99e-06	5.63e-05
lnc-RDH8-4	473	0	24	0.001	67.2291	16.0368	Up	8.83e-09	1.03e-07
lnc-CMKLR1-2	907	0	46	0.001	67.1982	16.0361	Up	3.92e-16	1.41e-14
lnc-C6orf105-8	296	0	15	0.001	67.1439	16.035	Up	8.99e-06	5.63e-05
lnc-TRNP1-5	498	0	25	0.001	66.5147	16.0214	Up	4.09e-09	5.08e-08
OR5E1P	521	0	26	0.001	66.1215	16.0128	Up	1.89e-09	2.48e-08
RPPH1	341	0	17	0.001	66.0544	16.0114	Up	1.93e-06	1.41e-05
lnc-DPH1-3	281	0	14	0.001	66.0129	16.0105	Up	1.94e-05	0.000112267
lnc-MTAP-4	363	0	18	0.001	65.7012	16.0036	Up	8.94e-07	7.03e-06
lnc-RMI2-4	934	0	46	0.001	65.2557	15.9938	Up	3.92e-16	1.42e-14
lnc-C17orf51-10	325	0	16	0.001	65.2295	15.9932	Up	4.16e-06	2.87e-05
lnc-CIB1-3	488	0	24	0.001	65.1626	15.9918	Up	8.83e-09	1.03e-07
PSMD7	1670	0	82	0.001	65.0586	15.9895	Up	3.65e-28	5.06e-26
lnc-C14orf79-1	204	0	10	0.001	64.9497	15.987	Up	0.000421462	0.00173195
lnc-POLR1A-4	225	0	11	0.001	64.7765	15.9832	Up	0.000195233	0.000867684
lnc-FAM49A-9	348	0	17	0.001	64.7257	15.9821	Up	1.93e-06	1.41e-05
lnc-FOLH1-1	1148	0	56	0.001	64.6329	15.98	Up	1.78e-19	1.01e-17
lnc-LRAT-2	574	0	28	0.001	64.6329	15.98	Up	4.06e-10	5.97e-09
lnc-SFT2D3-3	493	0	24	0.001	64.5018	15.9771	Up	8.83e-09	1.03e-07
lnc-WDR60-3	370	0	18	0.001	64.4582	15.9761	Up	8.94e-07	7.08e-06
lnc-AC115618.1-2	247	0	12	0.001	64.3712	15.9741	Up	9.04e-05	0.000440594
lnc-OSR1-5	207	0	10	0.001	64.0084	15.966	Up	0.000421462	0.00175101
lnc-DUSP9-2	290	0	14	0.001	63.9642	15.965	Up	1.94e-05	0.000112776
lnc-NLRP3-6	270	0	13	0.001	63.795	15.9612	Up	4.19e-05	0.00022557
lnc-HES1-4	1771	0	85	0.001	63.5927	15.9566	Up	3.62e-29	5.52e-27
lnc-FAM210A-9	480	0	23	0.001	63.4883	15.9542	Up	1.91e-08	2.08e-07
lnc-QRFP-3	544	0	26	0.001	63.3259	15.9505	Up	1.89e-09	2.49e-08
lnc-ZNF284-1	1552	0	74	0.001	63.1753	15.9471	Up	1.72e-25	1.81e-23
lnc-RP11-511B23.3.1-4	252	0	12	0.001	63.094	15.9452	Up	9.04e-05	0.000444158
lnc-RIBC1-3	252	0	12	0.001	63.094	15.9452	Up	9.04e-05	0.000443576
lnc-SKA2-6	316	0	15	0.001	62.8943	15.9406	Up	8.99e-06	5.61e-05
lnc-A2M-3	593	0	28	0.001	62.562	15.933	Up	4.06e-10	6e-09
lnc-ACSF2-2	637	0	30	0.001	62.4006	15.9293	Up	8.72e-11	1.43e-09
lnc-EPSTI1-1	1809	0	85	0.001	62.2569	15.9259	Up	3.62e-29	5.5e-27
lnc-NDP-2	662	0	31	0.001	62.0456	15.921	Up	4.04e-11	6.97e-10
lnc-AMELY-12	299	0	14	0.001	62.0389	15.9209	Up	1.94e-05	0.000114179
HIST1H4L	364	0	17	0.001	61.8806	15.9172	Up	1.93e-06	1.41e-05
lnc-PTPRN-1	364	0	17	0.001	61.8806	15.9172	Up	1.93e-06	1.41e-05
lnc-ITGBL1-1	429	0	20	0.001	61.7703	15.9146	Up	1.92e-07	1.73e-06
lnc-ANTXRL-3	473	0	22	0.001	61.6267	15.9113	Up	4.11e-08	4.27e-07
lnc-GGA2-4	474	0	22	0.001	61.4967	15.9082	Up	4.11e-08	4.24e-07
lnc-SCGN-3	671	0	31	0.001	61.2134	15.9016	Up	4.04e-11	6.98e-10
lnc-SHC3-3	455	0	21	0.001	61.1526	15.9001	Up	8.88e-08	8.63e-07
lnc-RP11-382B18.2.1-3	499	0	23	0.001	61.0709	15.8982	Up	1.91e-08	2.1e-07
lnc-SEPW1-5	500	0	23	0.001	60.9488	15.8953	Up	1.91e-08	2.1e-07
lnc-RAET1G-1	611	0	28	0.001	60.7189	15.8899	Up	4.06e-10	5.95e-09
lnc-C16orf61-1	789	0	36	0.001	60.4551	15.8836	Up	8.62e-13	1.9e-11
lnc-RPLP1-5	220	0	10	0.001	60.2261	15.8781	Up	0.000421462	0.00174504
RGR	1475	0	67	0.001	60.1852	15.8771	Up	3.76e-23	3.13e-21
lnc-CDR2-3	375	0	17	0.001	60.0655	15.8742	Up	1.93e-06	1.41e-05
lnc-LGI2-4	487	0	22	0.001	59.8551	15.8692	Up	4.11e-08	4.26e-07
lnc-CTH-8	466	0	21	0.001	59.7091	15.8657	Up	8.88e-08	8.63e-07
lnc-C2orf73-1	622	0	28	0.001	59.6451	15.8641	Up	4.06e-10	5.96e-09
AKR1C1	1379	0	62	0.001	59.571	15.8623	Up	1.76e-21	1.23e-19
lnc-ACHE-1	512	0	23	0.001	59.5203	15.8611	Up	1.91e-08	2.09e-07
lnc-DZANK1-7	245	0	11	0.001	59.4886	15.8603	Up	0.000195233	0.00088217
lnc-GORASP2-1	401	0	18	0.001	59.4751	15.86	Up	8.94e-07	7.02e-06
lnc-TNFRSF19-6	468	0	21	0.001	59.4539	15.8595	Up	8.88e-08	8.66e-07
lnc-FGF21-3	312	0	14	0.001	59.4539	15.8595	Up	1.94e-05	0.000112485
lnc-LIFR-8	269	0	12	0.001	59.1066	15.851	Up	9.04e-05	0.000439593
lnc-TRIM40-4	426	0	19	0.001	59.0951	15.8508	Up	4.14e-07	3.51e-06
lnc-IDS-13	2380	0	106	0.001	59.0114	15.8487	Up	3.47e-36	9.08e-34
lnc-KCNV1-4	517	0	23	0.001	58.9447	15.8471	Up	1.91e-08	2.1e-07
lnc-TNKS-2	517	0	23	0.001	58.9447	15.8471	Up	1.91e-08	2.09e-07
lnc-SYDE1-2	1394	0	62	0.001	58.93	15.8467	Up	1.76e-21	1.23e-19
lnc-TRIM45-2	383	0	17	0.001	58.8108	15.8438	Up	1.93e-06	1.42e-05
lnc-UBXN4-10	721	0	32	0.001	58.806	15.8437	Up	1.87e-11	3.37e-10
lnc-NEO1-1	452	0	20	0.001	58.6272	15.8393	Up	1.92e-07	1.75e-06
lnc-FEZ2-5	545	0	24	0.001	58.3475	15.8324	Up	8.83e-09	1.02e-07
lnc-NPIPP1-2	273	0	12	0.001	58.2406	15.8297	Up	9.04e-05	0.000439783
LCE3E	547	0	24	0.001	58.1341	15.8271	Up	8.83e-09	1.03e-07
lnc-CNKSR3-5	547	0	24	0.001	58.1341	15.8271	Up	8.83e-09	1.02e-07
lnc-SEC14L1-1	1028	0	45	0.001	57.9998	15.8238	Up	8.46e-16	2.9e-14
lnc-C3orf30-12	298	0	13	0.001	57.8009	15.8188	Up	4.19e-05	0.000223827
lnc-DOPEY2-1	596	0	26	0.001	57.8009	15.8188	Up	1.89e-09	2.49e-08
lnc-RIT1-1	619	0	27	0.001	57.7937	15.8186	Up	8.78e-10	1.22e-08
lnc-PDE2A-6	599	0	26	0.001	57.5114	15.8116	Up	1.89e-09	2.48e-08
BECN2	1296	0	56	0.001	57.2519	15.805	Up	1.78e-19	1.01e-17
lnc-PCDH10-7	719	0	31	0.001	57.1268	15.8019	Up	4.04e-11	6.99e-10
lnc-GINS3-1	580	0	25	0.001	57.1109	15.8015	Up	4.09e-09	5.07e-08
lnc-FAM104A-4	558	0	24	0.001	56.9881	15.7984	Up	8.83e-09	1.03e-07
lnc-ASCC1-2	512	0	22	0.001	56.9325	15.797	Up	4.11e-08	4.25e-07
lnc-C12orf53-2	419	0	18	0.001	56.9201	15.7967	Up	8.94e-07	7.03e-06
lnc-PPIAL4A-2	537	0	23	0.001	56.7493	15.7923	Up	1.91e-08	2.09e-07
lnc-DNTTIP2-4	584	0	25	0.001	56.7198	15.7916	Up	4.09e-09	5.07e-08
lnc-TRAM1-3	304	0	13	0.001	56.6601	15.79	Up	4.19e-05	0.000227396
lnc-FARS2-2	1357	0	58	0.001	56.6312	15.7893	Up	3.83e-20	2.29e-18
lnc-LSM12-3	281	0	12	0.001	56.5825	15.7881	Up	9.04e-05	0.000439545
lnc-C16orf58-8	211	0	9	0.001	56.5155	15.7864	Up	0.000909842	0.00337662
lnc-CALM2-9	469	0	20	0.001	56.5021	15.786	Up	1.92e-07	1.74e-06
lnc-MRPS18A-3	399	0	17	0.001	56.4525	15.7848	Up	1.93e-06	1.41e-05
lnc-ITIH2-1	799	0	34	0.001	56.3819	15.7829	Up	4.02e-12	8.09e-11
lnc-RBFOX3-1	752	0	32	0.001	56.3819	15.7829	Up	1.87e-11	3.39e-10
lnc-NAPB-3	353	0	15	0.001	56.302	15.7809	Up	8.99e-06	5.68e-05
lnc-CAMKMT-2	872	0	37	0.001	56.2202	15.7788	Up	3.99e-13	9.35e-12
lnc-EDIL3-5	449	0	19	0.001	56.0679	15.7749	Up	4.14e-07	3.49e-06
lnc-CRLF3-1	308	0	13	0.001	55.9242	15.7712	Up	4.19e-05	0.000226221
lnc-CEP97-2	498	0	21	0.001	55.8724	15.7698	Up	8.88e-08	8.58e-07
lnc-TPRA1-5	1001	0	42	0.001	55.5933	15.7626	Up	8.51e-15	2.55e-13
lnc-RND3-6	453	0	19	0.001	55.5728	15.7621	Up	4.14e-07	3.52e-06
lnc-GCNT1-2	861	0	36	0.001	55.3996	15.7576	Up	8.62e-13	1.91e-11
lnc-EBI3-1	311	0	13	0.001	55.3847	15.7572	Up	4.19e-05	0.000226031
lnc-BCL6-1	335	0	14	0.001	55.372	15.7569	Up	1.94e-05	0.000112572
lnc-MAP1LC3B2-7	359	0	15	0.001	55.361	15.7566	Up	8.99e-06	5.69e-05
SSX3	1319	0	55	0.001	55.2491	15.7537	Up	3.85e-19	2.1e-17
lnc-C9orf146-6	696	0	29	0.001	55.2072	15.7526	Up	1.88e-10	2.95e-09
PCBD2	2378	0	99	0.001	55.1608	15.7514	Up	7.59e-34	1.67e-31
lnc-SEC24C-4	458	0	19	0.001	54.9662	15.7463	Up	4.14e-07	3.52e-06
lnc-PDSS2-1	338	0	14	0.001	54.8806	15.744	Up	1.94e-05	0.000113747
lnc-CTTNBP2-2	435	0	18	0.001	54.8265	15.7426	Up	8.94e-07	7.13e-06
lnc-ASPG-4	290	0	12	0.001	54.8265	15.7426	Up	9.04e-05	0.000446157
lnc-TUBB2B-5	290	0	12	0.001	54.8265	15.7426	Up	9.04e-05	0.000439735
lnc-ALX3-2	508	0	21	0.001	54.7725	15.7412	Up	8.88e-08	8.65e-07
lnc-PSME2-2	460	0	19	0.001	54.7272	15.74	Up	4.14e-07	3.53e-06
lnc-AC011239.1.1-10	533	0	22	0.001	54.6893	15.739	Up	4.11e-08	4.28e-07
lnc-SLC35A1-4	412	0	17	0.001	54.6712	15.7385	Up	1.93e-06	1.42e-05
lnc-APOLD1-1	461	0	19	0.001	54.6085	15.7368	Up	4.14e-07	3.5e-06
lnc-SOCS4-4	437	0	18	0.001	54.5756	15.736	Up	8.94e-07	7.13e-06
lnc-IRX2-2	560	0	23	0.001	54.4186	15.7318	Up	1.91e-08	2.08e-07
lnc-STK35-3	268	0	11	0.001	54.3832	15.7309	Up	0.000195233	0.000877932
lnc-SCN1A-1	317	0	13	0.001	54.3365	15.7296	Up	4.19e-05	0.000224254
lnc-HOOK1-4	683	0	28	0.001	54.3181	15.7291	Up	4.06e-10	5.94e-09
lnc-MFSD2A-3	244	0	10	0.001	54.3022	15.7287	Up	0.000421462	0.00174023
lnc-CADM2-9	343	0	14	0.001	54.0806	15.7228	Up	1.94e-05	0.000112354
lnc-OLFM4-7	294	0	12	0.001	54.0806	15.7228	Up	9.04e-05	0.000441599
lnc-IGFBP2-2	735	0	30	0.001	54.0806	15.7228	Up	8.72e-11	1.42e-09
lnc-C6orf118-8	466	0	19	0.001	54.0225	15.7213	Up	4.14e-07	3.54e-06
lnc-CASP3-7	565	0	23	0.001	53.937	15.719	Up	1.91e-08	2.09e-07
lnc-RNF113A-1	468	0	19	0.001	53.7917	15.7151	Up	4.14e-07	3.52e-06
lnc-HLA-DRA-3	813	0	33	0.001	53.7812	15.7148	Up	8.67e-12	1.67e-10
lnc-NEDD9-1	222	0	9	0.001	53.7151	15.713	Up	0.000909842	0.00343334
lnc-RPS20-2	296	0	12	0.001	53.7151	15.713	Up	9.04e-05	0.000447287
KRTAP13-3	520	0	21	0.001	53.5086	15.7075	Up	8.88e-08	8.61e-07
lnc-TRIM29-1	570	0	23	0.001	53.4638	15.7063	Up	1.91e-08	2.09e-07
lnc-INSL4-1	273	0	11	0.001	53.3872	15.7042	Up	0.000195233	0.000881993
lnc-COQ4-2	573	0	23	0.001	53.1839	15.6987	Up	1.91e-08	2.09e-07
lnc-CYP2B6-2	549	0	22	0.001	53.0955	15.6963	Up	4.11e-08	4.25e-07
lnc-TBC1D7-3	675	0	27	0.001	52.9989	15.6937	Up	8.78e-10	1.22e-08
lnc-HNF4A-1	400	0	16	0.001	52.9989	15.6937	Up	4.16e-06	2.82e-05
lnc-PMAIP1-8	401	0	16	0.001	52.8668	15.6901	Up	4.16e-06	2.82e-05
lnc-ZSCAN5A-3	1103	0	44	0.001	52.8548	15.6897	Up	1.83e-15	6e-14
lnc-KLF10-3	553	0	22	0.001	52.7114	15.6858	Up	4.11e-08	4.25e-07
lnc-ATP6V0E2-6	554	0	22	0.001	52.6163	15.6832	Up	4.11e-08	4.24e-07
lnc-UBE3A-8	252	0	10	0.001	52.5783	15.6822	Up	0.000421462	0.00175166
lnc-C5orf64-2	454	0	18	0.001	52.532	15.6809	Up	8.94e-07	7.05e-06
HSP90B2P	2752	0	109	0.001	52.479	15.6795	Up	3.45e-37	9.4e-35
lnc-SLC6A2-3	354	0	14	0.001	52.4001	15.6773	Up	1.94e-05	0.000112601
APOBEC3A	1444	0	57	0.001	52.3016	15.6746	Up	8.26e-20	4.81e-18
LLPH	1217	0	48	0.001	52.2586	15.6734	Up	8.41e-17	3.38e-15
lnc-CCT5-12	305	0	12	0.001	52.1301	15.6698	Up	9.04e-05	0.00044557
lnc-ANO3-1	510	0	20	0.001	51.9598	15.6651	Up	1.92e-07	1.74e-06
lnc-C6orf201-1	640	0	25	0.001	51.7568	15.6595	Up	4.09e-09	5.04e-08
lnc-STX11-4	205	0	8	0.001	51.7063	15.6581	Up	0.00196414	0.00663046
lnc-PDZD7-3	977	0	38	0.001	51.5343	15.6532	Up	1.85e-13	4.57e-12
lnc-CTD-2210P24.4.1-2	566	0	22	0.001	51.5007	15.6523	Up	4.11e-08	4.23e-07
lnc-TSSC1-3	464	0	18	0.001	51.3998	15.6495	Up	8.94e-07	7.03e-06
lnc-OSBPL1A-4	774	0	30	0.001	51.3556	15.6482	Up	8.72e-11	1.43e-09
DNAJC14	3330	0	129	0.001	51.3278	15.6475	Up	7.15e-44	3.03e-41
lnc-ZNF583-3	465	0	18	0.001	51.2893	15.6464	Up	8.94e-07	7.06e-06
lnc-SLC35F5-12	465	0	18	0.001	51.2893	15.6464	Up	8.94e-07	7.03e-06
lnc-GOLGA8F-3	336	0	13	0.001	51.2639	15.6457	Up	4.19e-05	0.000226903
lnc-MMP15-1	415	0	16	0.001	51.0833	15.6406	Up	4.16e-06	2.86e-05
lnc-TMEM138-1	1299	0	50	0.001	50.9998	15.6382	Up	1.81e-17	7.9e-16
lnc-TSPO2-2	730	0	28	0.001	50.8209	15.6331	Up	4.06e-10	5.99e-09
lnc-WHSC1L1-5	730	0	28	0.001	50.8209	15.6331	Up	4.06e-10	5.97e-09
lnc-RABL2A-3	313	0	12	0.001	50.7977	15.6325	Up	9.04e-05	0.000442031
lnc-SLC15A4-5	549	0	21	0.001	50.6821	15.6292	Up	8.88e-08	8.66e-07
lnc-AL901608.1-39	340	0	13	0.001	50.6608	15.6286	Up	4.19e-05	0.000227012
lnc-MKKS-5	472	0	18	0.001	50.5287	15.6248	Up	8.94e-07	7.05e-06
lnc-ADAMTS7-1	578	0	22	0.001	50.4315	15.622	Up	4.11e-08	4.26e-07
lnc-GMDS-18	342	0	13	0.001	50.3645	15.6201	Up	4.19e-05	0.000222267
lnc-HAND1-2	1763	0	67	0.001	50.3535	15.6198	Up	3.76e-23	3.14e-21
lnc-HAPLN3-2	500	0	19	0.001	50.349	15.6197	Up	4.14e-07	3.52e-06
lnc-TTC23-3	395	0	15	0.001	50.3155	15.6187	Up	8.99e-06	5.67e-05
lnc-RASGRF1-3	316	0	12	0.001	50.3155	15.6187	Up	9.04e-05	0.000445082
lnc-RP11-43D2.2.1-19	316	0	12	0.001	50.3155	15.6187	Up	9.04e-05	0.000442609
lnc-LONP2-2	316	0	12	0.001	50.3155	15.6187	Up	9.04e-05	0.00044088
lnc-KIAA1614-5	738	0	28	0.001	50.27	15.6174	Up	4.06e-10	5.93e-09
lnc-CRH-1	555	0	21	0.001	50.1341	15.6135	Up	8.88e-08	8.6e-07
lnc-UCHL5-1	423	0	16	0.001	50.1172	15.613	Up	4.16e-06	2.84e-05
lnc-ITIH2-2	714	0	27	0.001	50.104	15.6126	Up	8.78e-10	1.22e-08
lnc-AL901608.1-13	291	0	11	0.001	50.0849	15.6121	Up	0.000195233	0.000887526
lnc-BTRC-4	344	0	13	0.001	50.0717	15.6117	Up	4.19e-05	0.000226194
lnc-CFHR5-3	1034	0	39	0.001	49.9748	15.6089	Up	8.57e-14	2.2e-12
lnc-FCRLB-1	292	0	11	0.001	49.9134	15.6071	Up	0.000195233	0.000873734
lnc-ZNF831-1	2522	0	95	0.001	49.9098	15.607	Up	1.65e-32	3.31e-30
lnc-RGS9-7	1142	0	43	0.001	49.8896	15.6065	Up	3.94e-15	1.23e-13
lnc-POTED-12	346	0	13	0.001	49.7822	15.6033	Up	4.19e-05	0.000226412
lnc-LSM11-4	346	0	13	0.001	49.7822	15.6033	Up	4.19e-05	0.00022232
lnc-UNC45B-1	559	0	21	0.001	49.7754	15.6031	Up	8.88e-08	8.59e-07
lnc-STAT3-1	855	0	32	0.001	49.5897	15.5978	Up	1.87e-11	3.38e-10
lnc-SYT8-4	482	0	18	0.001	49.4803	15.5946	Up	8.94e-07	7.05e-06
lnc-STK17B-2	1422	0	53	0.001	49.3837	15.5917	Up	1.79e-18	8.84e-17
lnc-ADCY2-2	564	0	21	0.001	49.3341	15.5903	Up	8.88e-08	8.57e-07
lnc-MMP23B-2	2821	0	105	0.001	49.3166	15.5898	Up	7.5e-36	1.9e-33
lnc-CCBE1-2	215	0	8	0.001	49.3013	15.5893	Up	0.00196414	0.00664744
lnc-LIPC-2	1102	0	41	0.001	49.2958	15.5892	Up	1.84e-14	5.24e-13
lnc-WNT4-1	323	0	12	0.001	49.225	15.5871	Up	9.04e-05	0.000440785
lnc-SOX6-6	431	0	16	0.001	49.187	15.586	Up	4.16e-06	2.85e-05
lnc-C3orf43-1	945	0	35	0.001	49.0731	15.5826	Up	1.86e-12	3.95e-11
lnc-CUL1-1	351	0	13	0.001	49.0731	15.5826	Up	4.19e-05	0.000224682
lnc-ACSBG2-4	567	0	21	0.001	49.0731	15.5826	Up	8.88e-08	8.61e-07
lnc-FAM27D1.1-4	487	0	18	0.001	48.9723	15.5797	Up	8.94e-07	7.04e-06
lnc-ODZ1-4	704	0	26	0.001	48.9337	15.5785	Up	1.89e-09	2.5e-08
lnc-C1orf96-5	1002	0	37	0.001	48.9262	15.5783	Up	3.99e-13	9.34e-12
lnc-FOXN2-3	325	0	12	0.001	48.9221	15.5782	Up	9.04e-05	0.000445375
lnc-RBM27-3	786	0	29	0.001	48.8858	15.5771	Up	1.88e-10	2.94e-09
lnc-SAP30-9	326	0	12	0.001	48.772	15.5738	Up	9.04e-05	0.000448571
lnc-DTNB-3	354	0	13	0.001	48.6572	15.5704	Up	4.19e-05	0.000224548
lnc-CDC42EP5-3	1697	0	62	0.001	48.408	15.563	Up	1.76e-21	1.24e-19
lnc-DCST1-1	219	0	8	0.001	48.4009	15.5627	Up	0.00196414	0.00667358
lnc-PCDH18-9	439	0	16	0.001	48.2906	15.5595	Up	4.16e-06	2.84e-05
lnc-PCF11-3	632	0	23	0.001	48.219	15.5573	Up	1.91e-08	2.1e-07
lnc-ZFP62-3	745	0	27	0.001	48.0192	15.5513	Up	8.78e-10	1.22e-08
lnc-FAM18A-5	552	0	20	0.001	48.0063	15.5509	Up	1.92e-07	1.75e-06
lnc-FCGR1B-1	664	0	24	0.001	47.8906	15.5475	Up	8.83e-09	1.03e-07
lnc-DEFB116-4	332	0	12	0.001	47.8906	15.5475	Up	9.04e-05	0.00043945
lnc-C1orf31-12	526	0	19	0.001	47.8603	15.5465	Up	4.14e-07	3.5e-06
lnc-SAT2-2	803	0	29	0.001	47.8509	15.5463	Up	1.88e-10	2.95e-09
lnc-TFEB-3	610	0	22	0.001	47.7859	15.5443	Up	4.11e-08	4.26e-07
PCDHGB8P	1973	0	71	0.001	47.6802	15.5411	Up	1.73e-24	1.64e-22
lnc-FIBIN-5	362	0	13	0.001	47.5819	15.5381	Up	4.19e-05	0.000222873
lnc-NTN1-1	557	0	20	0.001	47.5754	15.5379	Up	1.92e-07	1.75e-06
lnc-TSEN15-1	1394	0	50	0.001	47.5242	15.5364	Up	1.81e-17	7.93e-16
lnc-WWC1-1	474	0	17	0.001	47.5202	15.5363	Up	1.93e-06	1.41e-05
lnc-AP000350.4.1-2	531	0	19	0.001	47.4096	15.5329	Up	4.14e-07	3.52e-06
lnc-HSPA6-3	587	0	21	0.001	47.4011	15.5326	Up	8.88e-08	8.65e-07
lnc-C16orf72-8	643	0	23	0.001	47.3941	15.5324	Up	1.91e-08	2.09e-07
OR5AP2	951	0	34	0.001	47.3702	15.5317	Up	4.02e-12	8.08e-11
lnc-SEMA4B-6	1036	0	37	0.001	47.3205	15.5302	Up	3.99e-13	9.36e-12
lnc-HCN4-3	786	0	28	0.001	47.2001	15.5265	Up	4.06e-10	5.99e-09
LOC101927798	1041	0	37	0.001	47.0932	15.5232	Up	3.99e-13	9.27e-12
ZNF79	2195	0	78	0.001	47.0833	15.5229	Up	7.92e-27	9.39e-25
lnc-POLE3-3	563	0	20	0.001	47.0683	15.5225	Up	1.92e-07	1.74e-06
RBP4	929	0	33	0.001	47.0658	15.5224	Up	8.67e-12	1.66e-10
lnc-TBL1Y-8	366	0	13	0.001	47.0619	15.5223	Up	4.19e-05	0.000224521
lnc-SMN2-1	338	0	12	0.001	47.0405	15.5216	Up	9.04e-05	0.00044314
lnc-FGFR1OP-16	2065	0	73	0.001	46.8393	15.5154	Up	3.71e-25	3.77e-23
lnc-CHAF1A-2	510	0	18	0.001	46.7638	15.5131	Up	8.94e-07	7.14e-06
lnc-WRNIP1-31	483	0	17	0.001	46.6347	15.5091	Up	1.93e-06	1.4e-05
lnc-ZBTB2-6	398	0	14	0.001	46.6071	15.5083	Up	1.94e-05	0.000113762
lnc-RPL26L1-3	456	0	16	0.001	46.4903	15.5046	Up	4.16e-06	2.86e-05
lnc-CHCHD1-2	656	0	23	0.001	46.4549	15.5035	Up	1.91e-08	2.11e-07
lnc-MST4.1-9	970	0	34	0.001	46.4424	15.5032	Up	4.02e-12	8.07e-11
lnc-MTMR9-3	2260	0	79	0.001	46.3154	15.4992	Up	3.67e-27	4.47e-25
lnc-AC008686.1-6	373	0	13	0.001	46.1787	15.4949	Up	4.19e-05	0.000223005
lnc-IL12RB2-1	2269	0	79	0.001	46.1317	15.4935	Up	3.67e-27	4.5e-25
lnc-RAB11B-3	316	0	11	0.001	46.1225	15.4932	Up	0.000195233	0.000871304
lnc-SLC16A3-4	345	0	12	0.001	46.086	15.492	Up	9.04e-05	0.000443285
lnc-C13orf16-2	374	0	13	0.001	46.0552	15.4911	Up	4.19e-05	0.000223455
lnc-DCTD-14	2129	0	74	0.001	46.0536	15.491	Up	1.72e-25	1.81e-23
lnc-PTAR1-3	288	0	10	0.001	46.006	15.4895	Up	0.000421462	0.00175215
lnc-ABCA5-1	432	0	15	0.001	46.006	15.4895	Up	8.99e-06	5.66e-05
lnc-LRRC16A-1	577	0	20	0.001	45.9263	15.487	Up	1.92e-07	1.73e-06
lnc-CELSR1-1	434	0	15	0.001	45.794	15.4829	Up	8.99e-06	5.62e-05
FAM86FP	2143	0	74	0.001	45.7527	15.4816	Up	1.72e-25	1.8e-23
lnc-MBNL2-4	841	0	29	0.001	45.6887	15.4796	Up	1.88e-10	2.96e-09
lnc-RP11-680F20.4.1-1	698	0	24	0.001	45.5578	15.4754	Up	8.83e-09	1.02e-07
lnc-FGF23-1	495	0	17	0.001	45.5041	15.4737	Up	1.93e-06	1.4e-05
lnc-FAM120AOS-2	641	0	22	0.001	45.4749	15.4728	Up	4.11e-08	4.24e-07
IMP4	1049	0	36	0.001	45.471	15.4727	Up	8.62e-13	1.91e-11
lnc-SNW1-4	1079	0	37	0.001	45.4347	15.4715	Up	3.99e-13	9.28e-12
lnc-STAC2-2	525	0	18	0.001	45.4277	15.4713	Up	8.94e-07	7.05e-06
lnc-ZNF599-8	1489	0	51	0.001	45.3819	15.4698	Up	8.36e-18	3.79e-16
lnc-ABHD3-6	292	0	10	0.001	45.3758	15.4696	Up	0.000421462	0.00171532
lnc-LIMS2-2	852	0	29	0.001	45.0989	15.4608	Up	1.88e-10	2.92e-09
lnc-FEZF2-5	294	0	10	0.001	45.0671	15.4598	Up	0.000421462	0.00174376
lnc-LHCGR-2	647	0	22	0.001	45.0532	15.4593	Up	4.11e-08	4.24e-07
lnc-MTDH-1	236	0	8	0.001	44.9144	15.4549	Up	0.00196414	0.00673933
lnc-ATP5B-2	295	0	10	0.001	44.9144	15.4549	Up	0.000421462	0.00173306
lnc-GAD2-1	502	0	17	0.001	44.8696	15.4535	Up	1.93e-06	1.41e-05
lnc-RAB3GAP2-1	562	0	19	0.001	44.7945	15.451	Up	4.14e-07	3.52e-06
CCL26	562	0	19	0.001	44.7945	15.451	Up	4.14e-07	3.51e-06
lnc-NEIL1-3	562	0	19	0.001	44.7945	15.451	Up	4.14e-07	3.51e-06
lnc-TRMT11-5	1391	0	47	0.001	44.7691	15.4502	Up	1.82e-16	6.93e-15
lnc-NPC1L1-2	592	0	20	0.001	44.7626	15.45	Up	1.92e-07	1.73e-06
lnc-CCDC54-4	533	0	18	0.001	44.7458	15.4495	Up	8.94e-07	7.07e-06
lnc-ERRFI1-1	800	0	27	0.001	44.7179	15.4486	Up	8.78e-10	1.23e-08
lnc-CLUL1-1	2106	0	71	0.001	44.6691	15.447	Up	1.73e-24	1.65e-22
lnc-PEX14-3	267	0	9	0.001	44.662	15.4468	Up	0.000909842	0.00338473
lnc-SLC25A1-4	297	0	10	0.001	44.6119	15.4451	Up	0.000421462	0.00174988
lnc-THUMPD3-13	1188	0	40	0.001	44.6119	15.4451	Up	3.97e-14	1.07e-12
lnc-AIG1-6	357	0	12	0.001	44.5369	15.4427	Up	9.04e-05	0.000444838
CRYBB3	863	0	29	0.001	44.524	15.4423	Up	1.88e-10	2.95e-09
lnc-SSH1-2	506	0	17	0.001	44.5149	15.442	Up	1.93e-06	1.43e-05
CAV3	1431	0	48	0.001	44.4436	15.4397	Up	8.41e-17	3.38e-15
lnc-CCL18-4	388	0	13	0.001	44.3934	15.4381	Up	4.19e-05	0.00022404
lnc-FAH-2	448	0	15	0.001	44.363	15.4371	Up	8.99e-06	5.65e-05
lnc-ERAL1-5	599	0	20	0.001	44.2395	15.433	Up	1.92e-07	1.73e-06
SAMD5	6324	0	211	0.001	44.2077	15.432	Up	2.81e-71	3.24e-68
REM2	1859	0	62	0.001	44.1895	15.4314	Up	1.76e-21	1.24e-19
lnc-ZRSR2-3	510	0	17	0.001	44.1658	15.4306	Up	1.93e-06	1.42e-05
lnc-C12orf70-3	511	0	17	0.001	44.0794	15.4278	Up	1.93e-06	1.42e-05
lnc-KAT7-2	451	0	15	0.001	44.0679	15.4274	Up	8.99e-06	5.68e-05
lnc-UVRAG-1	842	0	28	0.001	44.0609	15.4272	Up	4.06e-10	5.98e-09
lnc-ARMCX6-2	753	0	25	0.001	43.9898	15.4249	Up	4.09e-09	5.09e-08
lnc-C9orf41-2	603	0	20	0.001	43.9461	15.4234	Up	1.92e-07	1.74e-06
lnc-TRIM73-2	573	0	19	0.001	43.9346	15.4231	Up	4.14e-07	3.53e-06
lnc-KRT8P11-1	815	0	27	0.001	43.8948	15.4218	Up	8.78e-10	1.23e-08
lnc-TCIRG1-2	1604	0	53	0.001	43.7803	15.418	Up	1.79e-18	8.87e-17
lnc-ACTR10-7	636	0	21	0.001	43.7491	15.417	Up	8.88e-08	8.67e-07
lnc-ATG4C-4	303	0	10	0.001	43.7285	15.4163	Up	0.000421462	0.00171331
lnc-CUBN-1	697	0	23	0.001	43.7222	15.4161	Up	1.91e-08	2.09e-07
lnc-TMEM232-1	697	0	23	0.001	43.7222	15.4161	Up	1.91e-08	2.09e-07
lnc-KDELR3-2	243	0	8	0.001	43.6205	15.4127	Up	0.00196414	0.00670248
lnc-KAT8-2	638	0	21	0.001	43.612	15.4124	Up	8.88e-08	8.66e-07
lnc-DLX4-2	395	0	13	0.001	43.6067	15.4123	Up	4.19e-05	0.000226521
lnc-SEMA5A-2	427	0	14	0.001	43.4418	15.4068	Up	1.94e-05	0.000113895
lnc-ABCD2-5	336	0	11	0.001	43.3771	15.4046	Up	0.000195233	0.000881284
lnc-FAM161B-4	1774	0	58	0.001	43.3193	15.4027	Up	3.83e-20	2.3e-18
lnc-EFCAB3-2	306	0	10	0.001	43.2998	15.4021	Up	0.000421462	0.00174536
lnc-ZNF138-1	612	0	20	0.001	43.2998	15.4021	Up	1.92e-07	1.73e-06
lnc-SLC48A1-2	582	0	19	0.001	43.2552	15.4006	Up	4.14e-07	3.54e-06
lnc-DSCR8-2	766	0	25	0.001	43.2433	15.4002	Up	4.09e-09	5.05e-08
lnc-ARNTL-1	368	0	12	0.001	43.2057	15.3989	Up	9.04e-05	0.000444109
lnc-CLN8-1	706	0	23	0.001	43.1649	15.3976	Up	1.91e-08	2.1e-07
lnc-A2M-2	492	0	16	0.001	43.0886	15.395	Up	4.16e-06	2.86e-05
lnc-GLIS2-5	523	0	17	0.001	43.068	15.3943	Up	1.93e-06	1.41e-05
lnc-CIR1-4	277	0	9	0.001	43.0497	15.3937	Up	0.000909842	0.00342644
lnc-PGAP1-1	216	0	7	0.001	42.939	15.39	Up	0.00424012	0.0129188
lnc-FBXO9-4	340	0	11	0.001	42.8668	15.3876	Up	0.000195233	0.000884394
lnc-RPS4Y1-7	588	0	19	0.001	42.8138	15.3858	Up	4.14e-07	3.54e-06
lnc-ZRSR1-3	652	0	21	0.001	42.6755	15.3811	Up	8.88e-08	8.6e-07
HP	1431	0	46	0.001	42.5917	15.3783	Up	3.92e-16	1.42e-14
lnc-SERP2-6	2372	0	76	0.001	42.4528	15.3736	Up	3.69e-26	4.15e-24
lnc-TIAM2-1	281	0	9	0.001	42.4369	15.373	Up	0.000909842	0.00341527
lnc-NR2F6-1	500	0	16	0.001	42.3992	15.3717	Up	4.16e-06	2.83e-05
lnc-HBE1-1	1001	0	32	0.001	42.3568	15.3703	Up	1.87e-11	3.39e-10
lnc-OR10H5-2	908	0	29	0.001	42.3174	15.369	Up	1.88e-10	2.93e-09
lnc-MRPL16-1	564	0	18	0.001	42.2864	15.3679	Up	8.94e-07	7.12e-06
lnc-M6PR-5	658	0	21	0.001	42.2864	15.3679	Up	8.88e-08	8.54e-07
lnc-FOXD2-1	815	0	26	0.001	42.2691	15.3673	Up	1.89e-09	2.5e-08
lnc-HSCB-5	377	0	12	0.001	42.1742	15.3641	Up	9.04e-05	0.000447928
lnc-AC136604.1-2	597	0	19	0.001	42.1683	15.3639	Up	4.14e-07	3.52e-06
lnc-GPR3-2	283	0	9	0.001	42.137	15.3628	Up	0.000909842	0.00338389
PRM1	409	0	13	0.001	42.1141	15.362	Up	4.19e-05	0.000222846
lnc-LRRIQ3-1	252	0	8	0.001	42.0627	15.3603	Up	0.00196414	0.00665095
lnc-LHX1-3	411	0	13	0.001	41.9091	15.355	Up	4.19e-05	0.000222767
RNF167	1708	0	54	0.001	41.8903	15.3543	Up	8.31e-19	4.3e-17
lnc-TEFM-6	633	0	20	0.001	41.8633	15.3534	Up	1.92e-07	1.74e-06
lnc-LINC00207-3	1045	0	33	0.001	41.8413	15.3526	Up	8.67e-12	1.66e-10
lnc-GAPT-4	222	0	7	0.001	41.7784	15.3505	Up	0.00424012	0.0129592
lnc-ATF7IP2-3	1681	0	53	0.001	41.7749	15.3503	Up	1.79e-18	8.86e-17
lnc-EFCAB4B-9	699	0	22	0.001	41.7016	15.3478	Up	4.11e-08	4.28e-07
lnc-C8orf85-6	286	0	9	0.001	41.695	15.3476	Up	0.000909842	0.00335006
lnc-RB1-2	922	0	29	0.001	41.6749	15.3469	Up	1.88e-10	2.95e-09
lnc-TTC26-4	764	0	24	0.001	41.6222	15.3451	Up	8.83e-09	1.03e-07
lnc-POFUT2-3	319	0	10	0.001	41.5352	15.342	Up	0.000421462	0.00171036
lnc-SLC1A2-4	2206	0	69	0.001	41.443	15.3388	Up	8.06e-24	7.17e-22
lnc-KLHDC10-1	576	0	18	0.001	41.4054	15.3375	Up	8.94e-07	7.1e-06
lnc-SSTR2-6	224	0	7	0.001	41.4054	15.3375	Up	0.00424012	0.0129539
lnc-CCM2-3	2149	0	67	0.001	41.3091	15.3342	Up	3.76e-23	3.13e-21
lnc-CHAD-6	257	0	8	0.001	41.2443	15.3319	Up	0.00196414	0.00675584
lnc-SOX6-1	386	0	12	0.001	41.1909	15.33	Up	9.04e-05	0.000441983
lnc-HOMEZ-2	386	0	12	0.001	41.1909	15.33	Up	9.04e-05	0.000439973
lnc-RPRD1A-3	644	0	20	0.001	41.1482	15.3285	Up	1.92e-07	1.75e-06
lnc-CSRP1-3	1417	0	44	0.001	41.1424	15.3283	Up	1.83e-15	5.98e-14
lnc-MMAA-4	548	0	17	0.001	41.1032	15.327	Up	1.93e-06	1.43e-05
lnc-EVL-3	387	0	12	0.001	41.0845	15.3263	Up	9.04e-05	0.000442513
lnc-KCNK6-2	452	0	14	0.001	41.039	15.3247	Up	1.94e-05	0.000114164
lnc-ANGPTL1-9	226	0	7	0.001	41.039	15.3247	Up	0.00424012	0.0128943
lnc-AL901608.1-19	291	0	9	0.001	40.9786	15.3226	Up	0.000909842	0.00336218
lnc-RARS-4	1489	0	46	0.001	40.9327	15.321	Up	3.92e-16	1.42e-14
lnc-RNF44-1	292	0	9	0.001	40.8382	15.3176	Up	0.000909842	0.00343075
lnc-CEP120-4	649	0	20	0.001	40.8312	15.3174	Up	1.92e-07	1.74e-06
lnc-F8-1	552	0	17	0.001	40.8053	15.3165	Up	1.93e-06	1.42e-05
lnc-C16orf61-3	650	0	20	0.001	40.7684	15.3152	Up	1.92e-07	1.74e-06
lnc-TPGS2-8	586	0	18	0.001	40.6988	15.3127	Up	8.94e-07	7.11e-06
lnc-RP11-10A14.4.1-2	554	0	17	0.001	40.658	15.3113	Up	1.93e-06	1.41e-05
lnc-GPR37-2	717	0	22	0.001	40.6547	15.3111	Up	4.11e-08	4.26e-07
lnc-FRAT1-4	978	0	30	0.001	40.6434	15.3107	Up	8.72e-11	1.42e-09
lnc-HSD17B2-1	424	0	13	0.001	40.6242	15.3101	Up	4.19e-05	0.000224467
lnc-PREP-4	261	0	8	0.001	40.6122	15.3096	Up	0.00196414	0.00669028
lnc-MTNR1A-7	457	0	14	0.001	40.59	15.3088	Up	1.94e-05	0.00011221
lnc-CPA5-1	622	0	19	0.001	40.4735	15.3047	Up	4.14e-07	3.49e-06
lnc-DCAF12L2-1	1673	0	51	0.001	40.3907	15.3017	Up	8.36e-18	3.81e-16
NNMT	1578	0	48	0.001	40.3034	15.2986	Up	8.41e-17	3.37e-15
lnc-IGFL3-6	330	0	10	0.001	40.1507	15.2931	Up	0.000421462	0.00171626
lnc-CYP1B1-2	859	0	26	0.001	40.104	15.2915	Up	1.89e-09	2.5e-08
LOC388282	1289	0	39	0.001	40.0884	15.2909	Up	8.57e-14	2.21e-12
lnc-SOX21-4	463	0	14	0.001	40.064	15.29	Up	1.94e-05	0.000112296
RAX2	2153	0	65	0.001	40.0015	15.2878	Up	1.75e-22	1.37e-20
lnc-SCAF1-2	497	0	15	0.001	39.9891	15.2873	Up	8.99e-06	5.65e-05
lnc-SSTR4-18	398	0	12	0.001	39.949	15.2859	Up	9.04e-05	0.00044479
lnc-ITPK1-2	565	0	17	0.001	39.8665	15.2829	Up	1.93e-06	1.42e-05
lnc-AC106876.2.1-1	266	0	8	0.001	39.8488	15.2822	Up	0.00196414	0.00662548
lnc-ING1-1	1667	0	50	0.001	39.7413	15.2784	Up	1.81e-17	7.91e-16
lnc-DRD2-6	1235	0	37	0.001	39.6956	15.2767	Up	3.99e-13	9.31e-12
lnc-PATE4-1	501	0	15	0.001	39.6699	15.2758	Up	8.99e-06	5.66e-05
lnc-COPS2-5	301	0	9	0.001	39.6172	15.2738	Up	0.000909842	0.00335611
lnc-IFT81-4	2342	0	70	0.001	39.6021	15.2733	Up	3.74e-24	3.45e-22
lnc-RP11-944C7.1.1-3	1640	0	49	0.001	39.5876	15.2728	Up	3.9e-17	1.63e-15
lnc-C3orf30-14	201	0	6	0.001	39.5515	15.2714	Up	0.00915346	0.0254879
lnc-SCUBE3-2	871	0	26	0.001	39.5515	15.2714	Up	1.89e-09	2.5e-08
lnc-CUL1-4	268	0	8	0.001	39.5515	15.2714	Up	0.00196414	0.00670451
lnc-PLA2G10-4	268	0	8	0.001	39.5515	15.2714	Up	0.00196414	0.00661654
lnc-TSHZ1-4	838	0	25	0.001	39.5279	15.2706	Up	4.09e-09	5.1e-08
lnc-CELF2-2	503	0	15	0.001	39.5121	15.27	Up	8.99e-06	5.63e-05
lnc-C3orf30-16	369	0	11	0.001	39.4979	15.2695	Up	0.000195233	0.000866741
SKP1P2	1882	0	56	0.001	39.4254	15.2668	Up	1.78e-19	1.01e-17
lnc-HDDC2-1	437	0	13	0.001	39.4157	15.2665	Up	4.19e-05	0.000223402
lnc-MICU1-1	269	0	8	0.001	39.4044	15.2661	Up	0.00196414	0.00668876
lnc-LGALS7B-2	371	0	11	0.001	39.2849	15.2617	Up	0.000195233	0.000872518
lnc-ZSCAN1-2	270	0	8	0.001	39.2585	15.2607	Up	0.00196414	0.00670604
lnc-CDKN2B-5	473	0	14	0.001	39.217	15.2592	Up	1.94e-05	0.000114014
lnc-DYNLRB2-8	203	0	6	0.001	39.1618	15.2572	Up	0.00915346	0.025461
lnc-TTC3-6	305	0	9	0.001	39.0976	15.2548	Up	0.000909842	0.00337913
TMEM114	644	0	19	0.001	39.0908	15.2545	Up	4.14e-07	3.5e-06
lnc-CTD-2210P24.4.1-9	441	0	13	0.001	39.0582	15.2533	Up	4.19e-05	0.000224227
lnc-NR6A1-2	509	0	15	0.001	39.0464	15.2529	Up	8.99e-06	5.7e-05
lnc-RP11-744I24.1.1-1	1426	0	42	0.001	39.0245	15.2521	Up	8.51e-15	2.54e-13
lnc-MEGF11-1	578	0	17	0.001	38.9698	15.2501	Up	1.93e-06	1.42e-05
lnc-ANGPTL1-11	306	0	9	0.001	38.9698	15.2501	Up	0.000909842	0.00337105
lnc-EIF3F-1	544	0	16	0.001	38.9698	15.2501	Up	4.16e-06	2.82e-05
lnc-C1orf186-1	681	0	20	0.001	38.9126	15.2479	Up	1.92e-07	1.73e-06
lnc-FCAR-2	547	0	16	0.001	38.7561	15.2421	Up	4.16e-06	2.83e-05
lnc-NFASC-5	582	0	17	0.001	38.702	15.2401	Up	1.93e-06	1.4e-05
lnc-TTC35-9	754	0	22	0.001	38.6597	15.2385	Up	4.11e-08	4.24e-07
lnc-HS1BP3-3	480	0	14	0.001	38.6451	15.238	Up	1.94e-05	0.000113303
lnc-CCDC64B-3	549	0	16	0.001	38.6149	15.2369	Up	4.16e-06	2.85e-05
lnc-MYBPC2-1	859	0	25	0.001	38.5615	15.2349	Up	4.09e-09	5.07e-08
lnc-CC2D1B-2	344	0	10	0.001	38.5167	15.2332	Up	0.000421462	0.00173164
lnc-C4orf32-4	517	0	15	0.001	38.4422	15.2304	Up	8.99e-06	5.64e-05
lnc-RP11-352D3.2.1-1	276	0	8	0.001	38.405	15.229	Up	0.00196414	0.00666703
lnc-C5orf25-4	587	0	17	0.001	38.3723	15.2278	Up	1.93e-06	1.41e-05
lnc-CRYBA1-3	449	0	13	0.001	38.3623	15.2274	Up	4.19e-05	0.000223058
lnc-KRT7-2	380	0	11	0.001	38.3545	15.2271	Up	0.000195233	0.000873821
lnc-C21orf119-2	242	0	7	0.001	38.3257	15.226	Up	0.00424012	0.0128317
lnc-IRAK4-2	450	0	13	0.001	38.277	15.2242	Up	4.19e-05	0.000224735
lnc-TM9SF3-2	831	0	24	0.001	38.2664	15.2238	Up	8.83e-09	1.03e-07
lnc-MYBL2-1	2425	0	70	0.001	38.2467	15.223	Up	3.74e-24	3.43e-22
lnc-DTHD1-8	1318	0	38	0.001	38.2011	15.2213	Up	1.85e-13	4.57e-12
lnc-LRP1B-7	243	0	7	0.001	38.168	15.2201	Up	0.00424012	0.0130372
lnc-VN1R2-12	486	0	14	0.001	38.168	15.2201	Up	1.94e-05	0.000113259
lnc-ASPH-7	2743	0	79	0.001	38.16	15.2198	Up	3.67e-27	4.49e-25
lnc-TMEM178-6	521	0	15	0.001	38.147	15.2193	Up	8.99e-06	5.69e-05
lnc-SRSF2-4	695	0	20	0.001	38.1287	15.2186	Up	1.92e-07	1.75e-06
lnc-HSF2BP-2	661	0	19	0.001	38.0855	15.217	Up	4.14e-07	3.5e-06
lnc-ABHD3-5	348	0	10	0.001	38.074	15.2165	Up	0.000421462	0.00174279
lnc-MRPL19-11	870	0	25	0.001	38.074	15.2165	Up	4.09e-09	5.05e-08
lnc-PLCXD3-1	1671	0	48	0.001	38.0603	15.216	Up	8.41e-17	3.38e-15
lnc-PLCG2-6	2055	0	59	0.001	38.0406	15.2153	Up	1.77e-20	1.09e-18
lnc-SHISA2-4	418	0	12	0.001	38.0375	15.2151	Up	9.04e-05	0.000442272
lnc-IPO5-1	871	0	25	0.001	38.0302	15.2149	Up	4.09e-09	5.09e-08
lnc-ATP1A1OS-7	1709	0	49	0.001	37.9893	15.2133	Up	3.9e-17	1.64e-15
lnc-GABPA-14	314	0	9	0.001	37.977	15.2128	Up	0.000909842	0.00341784
lnc-ARHGAP26-5	349	0	10	0.001	37.9649	15.2124	Up	0.000421462	0.00173688
lnc-GDI2-1	945	0	27	0.001	37.8564	15.2082	Up	8.78e-10	1.23e-08
lnc-SLC2A3-3	315	0	9	0.001	37.8564	15.2082	Up	0.000909842	0.00336135
lnc-C5orf20-3	315	0	9	0.001	37.8564	15.2082	Up	0.000909842	0.0033454
lnc-ESAM-2	421	0	12	0.001	37.7665	15.2048	Up	9.04e-05	0.000448769
lnc-TMCO6-3	316	0	9	0.001	37.7366	15.2037	Up	0.000909842	0.0033769
lnc-ACTR1B-9	281	0	8	0.001	37.7217	15.2031	Up	0.00196414	0.00659725
lnc-GNPAT-1	211	0	6	0.001	37.677	15.2014	Up	0.00915346	0.0255607
lnc-COMMD6-1	2044	0	58	0.001	37.5971	15.1983	Up	3.83e-20	2.3e-18
lnc-SLC38A8-1	388	0	11	0.001	37.5637	15.1971	Up	0.000195233	0.000878548
lnc-C7orf41-6	247	0	7	0.001	37.5499	15.1965	Up	0.00424012	0.0131552
lnc-RAI2-3	353	0	10	0.001	37.5347	15.1959	Up	0.000421462	0.00173179
lnc-C11orf82-9	318	0	9	0.001	37.4993	15.1946	Up	0.000909842	0.00339965
lnc-NUMBL-1	283	0	8	0.001	37.4551	15.1929	Up	0.00196414	0.00671012
lnc-ANKRD33-7	283	0	8	0.001	37.4551	15.1929	Up	0.00196414	0.00658445
lnc-GPBAR1-4	248	0	7	0.001	37.3984	15.1907	Up	0.00424012	0.0131117
lnc-RLTPR-1	638	0	18	0.001	37.3817	15.19	Up	8.94e-07	7.05e-06
lnc-SFTPD-7	426	0	12	0.001	37.3232	15.1878	Up	9.04e-05	0.000448818
lnc-TMCO1-1	675	0	19	0.001	37.2956	15.1867	Up	4.14e-07	3.53e-06
lnc-MITF-3	995	0	28	0.001	37.2857	15.1863	Up	4.06e-10	5.97e-09
OR4K17	1032	0	29	0.001	37.2328	15.1843	Up	1.88e-10	2.95e-09
ODF3	1284	0	36	0.001	37.1488	15.181	Up	8.62e-13	1.9e-11
lnc-GTF2F2-6	892	0	25	0.001	37.1349	15.1805	Up	4.09e-09	5.06e-08
lnc-RUFY4-2	571	0	16	0.001	37.1271	15.1802	Up	4.16e-06	2.86e-05
lnc-RP11-582J16.5.1-6	536	0	15	0.001	37.0795	15.1783	Up	8.99e-06	5.67e-05
lnc-TRMT61B-7	1432	0	40	0.001	37.0104	15.1756	Up	3.97e-14	1.07e-12
lnc-ADD1-5	394	0	11	0.001	36.9916	15.1749	Up	0.000195233	0.00087191
lnc-CD9-3	394	0	11	0.001	36.9916	15.1749	Up	0.000195233	0.000868285
lnc-ATE1-2	215	0	6	0.001	36.976	15.1743	Up	0.00915346	0.0254311
lnc-ARL5C-7	215	0	6	0.001	36.976	15.1743	Up	0.00915346	0.0251897
lnc-SETD6-6	251	0	7	0.001	36.9515	15.1733	Up	0.00424012	0.0130883
lnc-C10orf136-3	251	0	7	0.001	36.9515	15.1733	Up	0.00424012	0.0130524
lnc-IGFBP1-6	251	0	7	0.001	36.9515	15.1733	Up	0.00424012	0.0127647
lnc-SEPW1-1	1148	0	32	0.001	36.9331	15.1726	Up	1.87e-11	3.37e-10
lnc-JMJD4-2	1077	0	30	0.001	36.9073	15.1716	Up	8.72e-11	1.42e-09
lnc-MYL12B-4	755	0	21	0.001	36.8536	15.1695	Up	8.88e-08	8.57e-07
lnc-WDR36-1	288	0	8	0.001	36.8048	15.1676	Up	0.00196414	0.00664294
lnc-ETAA1-14	288	0	8	0.001	36.8048	15.1676	Up	0.00196414	0.00663894
lnc-MYO7B-1	649	0	18	0.001	36.7481	15.1654	Up	8.94e-07	7.11e-06
lnc-LANCL2-2	939	0	26	0.001	36.6872	15.163	Up	1.89e-09	2.49e-08
lnc-SH3BP4-9	289	0	8	0.001	36.6775	15.1626	Up	0.00196414	0.00670298
lnc-ATP6V1E1-2	832	0	23	0.001	36.6279	15.1607	Up	1.91e-08	2.1e-07
lnc-C1orf195-6	326	0	9	0.001	36.579	15.1587	Up	0.000909842	0.00342701
lnc-GSDMC-7	435	0	12	0.001	36.551	15.1576	Up	9.04e-05	0.000441839
lnc-TMEM151A-1	544	0	15	0.001	36.5342	15.157	Up	8.99e-06	5.69e-05
lnc-TNFRSF19-1	400	0	11	0.001	36.4368	15.1531	Up	0.000195233	0.000870785
lnc-HERPUD2-1	1091	0	30	0.001	36.4337	15.153	Up	8.72e-11	1.42e-09
lnc-AL033381.1-10	764	0	21	0.001	36.4194	15.1524	Up	8.88e-08	8.59e-07
lnc-PAFAH1B1-1	473	0	13	0.001	36.4158	15.1523	Up	4.19e-05	0.000223296
lnc-GGA2-1	837	0	23	0.001	36.4091	15.152	Up	1.91e-08	2.1e-07
lnc-EVX1-7	1129	0	31	0.001	36.381	15.1509	Up	4.04e-11	6.98e-10
lnc-PDP1-1	510	0	14	0.001	36.3718	15.1505	Up	1.94e-05	0.00011394
lnc-NVL-5	255	0	7	0.001	36.3718	15.1505	Up	0.00424012	0.0131235
lnc-RERE-5	255	0	7	0.001	36.3718	15.1505	Up	0.00424012	0.0128352
ZFPL1	1386	0	38	0.001	36.3268	15.1487	Up	1.85e-13	4.56e-12
lnc-CHST11-2	1022	0	28	0.001	36.3006	15.1477	Up	4.06e-10	5.96e-09
KIR2DS4	1608	0	44	0.001	36.2555	15.1459	Up	1.83e-15	5.98e-14
lnc-PLEC-5	256	0	7	0.001	36.2297	15.1449	Up	0.00424012	0.0130319
lnc-ATP5O-2	293	0	8	0.001	36.1768	15.1428	Up	0.00196414	0.00672649
lnc-GDPD4-4	220	0	6	0.001	36.1356	15.1411	Up	0.00915346	0.024915
lnc-SVIP-2	404	0	11	0.001	36.076	15.1388	Up	0.000195233	0.000868028
lnc-SYK-6	1249	0	34	0.001	36.0681	15.1384	Up	4.02e-12	8.08e-11
lnc-IGFBP7-9	331	0	9	0.001	36.0265	15.1368	Up	0.000909842	0.00338277
lnc-CCT5-22	405	0	11	0.001	35.9869	15.1352	Up	0.000195233	0.000865971
lnc-LRRTM1-5	1327	0	36	0.001	35.945	15.1335	Up	8.62e-13	1.92e-11
lnc-P2RX5-4	591	0	16	0.001	35.8707	15.1305	Up	4.16e-06	2.85e-05
lnc-IRGC-2	518	0	14	0.001	35.8101	15.1281	Up	1.94e-05	0.000112746
lnc-TSEN15-5	407	0	11	0.001	35.8101	15.1281	Up	0.000195233	0.000869232
lnc-KIAA1614-1	1480	0	40	0.001	35.8101	15.1281	Up	3.97e-14	1.07e-12
lnc-FBXL4-6	334	0	9	0.001	35.7029	15.1238	Up	0.000909842	0.00340844
lnc-RP4-725G10.1.1-2	297	0	8	0.001	35.6895	15.1232	Up	0.00196414	0.00675067
lnc-RGPD1-2	594	0	16	0.001	35.6895	15.1232	Up	4.16e-06	2.85e-05
lnc-SCPEP1-1	669	0	18	0.001	35.6495	15.1216	Up	8.94e-07	7.02e-06
lnc-C3orf35-2	1190	0	32	0.001	35.6295	15.1208	Up	1.87e-11	3.38e-10
lnc-KIAA1267-4	595	0	16	0.001	35.6295	15.1208	Up	4.16e-06	2.83e-05
lnc-PKDREJ-3	372	0	10	0.001	35.6176	15.1203	Up	0.000421462	0.00171486
lnc-NR2C2-4	335	0	9	0.001	35.5963	15.1194	Up	0.000909842	0.00340815
lnc-MYCN-14	596	0	16	0.001	35.5698	15.1184	Up	4.16e-06	2.84e-05
lnc-SELV.1-3	559	0	15	0.001	35.5539	15.1177	Up	8.99e-06	5.69e-05
lnc-ACACB-1	560	0	15	0.001	35.4904	15.1151	Up	8.99e-06	5.66e-05
CLN6	2242	0	60	0.001	35.4587	15.1139	Up	8.21e-21	5.29e-19
lnc-C20orf94-1	1047	0	28	0.001	35.4339	15.1128	Up	4.06e-10	5.95e-09
lnc-ANKRD33B-3	374	0	10	0.001	35.4271	15.1126	Up	0.000421462	0.00172911
OR6B1	936	0	25	0.001	35.3893	15.111	Up	4.09e-09	5.04e-08
lnc-PKDCC-6	674	0	18	0.001	35.3851	15.1109	Up	8.94e-07	7.04e-06
lnc-ZFYVE20-1	487	0	13	0.001	35.3689	15.1102	Up	4.19e-05	0.000226439
lnc-GOLGB1-1	450	0	12	0.001	35.3326	15.1087	Up	9.04e-05	0.000444741
lnc-C11orf55-6	450	0	12	0.001	35.3326	15.1087	Up	9.04e-05	0.00044343
lnc-FBXO18-1	750	0	20	0.001	35.3326	15.1087	Up	1.92e-07	1.73e-06
lnc-C8orf48-3	488	0	13	0.001	35.2964	15.1072	Up	4.19e-05	0.000227287
OR2M7	939	0	25	0.001	35.2762	15.1064	Up	4.09e-09	5.07e-08
lnc-MAF-9	451	0	12	0.001	35.2543	15.1055	Up	9.04e-05	0.000446992
lnc-CXADR-5	790	0	21	0.001	35.2208	15.1041	Up	8.88e-08	8.56e-07
lnc-DAB2IP-2	301	0	8	0.001	35.2152	15.1039	Up	0.00196414	0.00658789
lnc-MAST2-5	226	0	6	0.001	35.1763	15.1023	Up	0.00915346	0.0253887
lnc-HDAC2-8	1130	0	30	0.001	35.1763	15.1023	Up	8.72e-11	1.43e-09
lnc-TNFRSF8-2	603	0	16	0.001	35.1568	15.1015	Up	4.16e-06	2.84e-05
lnc-LYRM7-4	641	0	17	0.001	35.1397	15.1008	Up	1.93e-06	1.4e-05
lnc-SLIRP-2	528	0	14	0.001	35.1319	15.1005	Up	1.94e-05	0.000112659
lnc-FAM9C-5	566	0	15	0.001	35.1141	15.0998	Up	8.99e-06	5.7e-05
lnc-ADCK3-3	566	0	15	0.001	35.1141	15.0998	Up	8.99e-06	5.67e-05
lnc-EYA2-1	340	0	9	0.001	35.0728	15.0981	Up	0.000909842	0.00341442
lnc-RAB40B-3	1020	0	27	0.001	35.0728	15.0981	Up	8.78e-10	1.22e-08
lnc-SOCS6-15	378	0	10	0.001	35.0522	15.0972	Up	0.000421462	0.00173784
lnc-HIGD2A-1	454	0	12	0.001	35.0213	15.0959	Up	9.04e-05	0.000447681
lnc-NEO1-2	530	0	14	0.001	34.9993	15.095	Up	1.94e-05	0.000113554
lnc-TLR5-1	568	0	15	0.001	34.9905	15.0947	Up	8.99e-06	5.66e-05
lnc-AKR1E2-13	417	0	11	0.001	34.9513	15.0931	Up	0.000195233	0.000884216
lnc-NDUFS6-13	607	0	16	0.001	34.9252	15.092	Up	4.16e-06	2.84e-05
lnc-DYRK2-11	1102	0	29	0.001	34.8677	15.0896	Up	1.88e-10	2.95e-09
OR2K2	951	0	25	0.001	34.8311	15.0881	Up	4.09e-09	5.1e-08
lnc-SLC47A1-3	913	0	24	0.001	34.8295	15.088	Up	8.83e-09	1.03e-07
lnc-WDR7-6	609	0	16	0.001	34.8105	15.0872	Up	4.16e-06	2.87e-05
lnc-SCRN3-2	457	0	12	0.001	34.7914	15.0864	Up	9.04e-05	0.000442851
lnc-FPGS-2	1105	0	29	0.001	34.7731	15.0857	Up	1.88e-10	2.93e-09
lnc-DDO-1	305	0	8	0.001	34.7534	15.0849	Up	0.00196414	0.00665848
lnc-CLUL1-3	534	0	14	0.001	34.7371	15.0842	Up	1.94e-05	0.000113955
lnc-FARP1-6	267	0	7	0.001	34.7371	15.0842	Up	0.00424012	0.0128447
lnc-RP11-127H5.1.1-2	344	0	9	0.001	34.665	15.0812	Up	0.000909842	0.00342874
lnc-AGRP-7	650	0	17	0.001	34.6532	15.0807	Up	1.93e-06	1.41e-05
lnc-ARF6-12	306	0	8	0.001	34.6398	15.0801	Up	0.00196414	0.00664094
lnc-PTOV1-1	421	0	11	0.001	34.6193	15.0793	Up	0.000195233	0.000880753
lnc-JAG1-1	729	0	19	0.001	34.5329	15.0757	Up	4.14e-07	3.51e-06
lnc-TNIP3-1	307	0	8	0.001	34.527	15.0754	Up	0.00196414	0.00672341
lnc-SOD1-10	576	0	15	0.001	34.5045	15.0745	Up	8.99e-06	5.68e-05
lnc-TNFRSF17-1	384	0	10	0.001	34.5045	15.0745	Up	0.000421462	0.00172532
lnc-TRIO-1	538	0	14	0.001	34.4789	15.0734	Up	1.94e-05	0.000112863
lnc-CSNK1A1-5	423	0	11	0.001	34.4556	15.0724	Up	0.000195233	0.00087723
lnc-APBB2-3	2118	0	55	0.001	34.4068	15.0704	Up	3.85e-19	2.09e-17
lnc-RP11-468E2.4.1-2	424	0	11	0.001	34.3743	15.069	Up	0.000195233	0.000871564
lnc-KCNJ16-3	1698	0	44	0.001	34.3338	15.0673	Up	1.83e-15	5.97e-14
lnc-CDKN3-5	309	0	8	0.001	34.3035	15.0661	Up	0.00196414	0.00676413
lnc-ASB13-1	657	0	17	0.001	34.2839	15.0652	Up	1.93e-06	1.41e-05
lnc-SDSL-9	542	0	14	0.001	34.2244	15.0627	Up	1.94e-05	0.000112166
lnc-INO80D-5	892	0	23	0.001	34.1641	15.0602	Up	1.91e-08	2.11e-07
lnc-RP4-604K5.1.1-1	233	0	6	0.001	34.1195	15.0583	Up	0.00915346	0.0249831
OR2A12	933	0	24	0.001	34.0829	15.0568	Up	8.83e-09	1.03e-07
lnc-RP1-241P17.4.1-1	1323	0	34	0.001	34.0507	15.0554	Up	4.02e-12	8.04e-11
lnc-GK-8	663	0	17	0.001	33.9737	15.0521	Up	1.93e-06	1.41e-05
HOXB7	1366	0	35	0.001	33.9488	15.0511	Up	1.86e-12	3.94e-11
lnc-SFTA2-13	625	0	16	0.001	33.9193	15.0498	Up	4.16e-06	2.83e-05
lnc-KLF6-4	430	0	11	0.001	33.8947	15.0488	Up	0.000195233	0.000887077
lnc-CEP170-12	391	0	10	0.001	33.8868	15.0484	Up	0.000421462	0.00173386
lnc-C1D-5	665	0	17	0.001	33.8715	15.0478	Up	1.93e-06	1.41e-05
lnc-CCT5-13	313	0	8	0.001	33.8651	15.0475	Up	0.00196414	0.00671983
lnc-MCFD2-2	274	0	7	0.001	33.8497	15.0469	Up	0.00424012	0.0131162
lnc-STXBP3-2	783	0	20	0.001	33.8435	15.0466	Up	1.92e-07	1.75e-06
lnc-ETV3-2	392	0	10	0.001	33.8003	15.0448	Up	0.000421462	0.00173465
lnc-NOS2-1	941	0	24	0.001	33.7932	15.0444	Up	8.83e-09	1.03e-07
lnc-ATF4-1	510	0	13	0.001	33.7738	15.0436	Up	4.19e-05	0.00022595
lnc-RRM1-4	432	0	11	0.001	33.7378	15.0421	Up	0.000195233	0.000872257
lnc-UNC13C-6	275	0	7	0.001	33.7266	15.0416	Up	0.00424012	0.0130515
lnc-CHST14-1	354	0	9	0.001	33.6858	15.0399	Up	0.000909842	0.00342989
lnc-ZBTB49-1	1416	0	36	0.001	33.6858	15.0399	Up	8.62e-13	1.9e-11
lnc-FAM53C-1	551	0	14	0.001	33.6654	15.039	Up	1.94e-05	0.000113186
lnc-MMADHC-5	315	0	8	0.001	33.6501	15.0383	Up	0.00196414	0.00666451
IL9	591	0	15	0.001	33.6288	15.0374	Up	8.99e-06	5.68e-05
lnc-FANCI-4	1537	0	39	0.001	33.62	15.037	Up	8.57e-14	2.19e-12
lnc-NCOA3-13	276	0	7	0.001	33.6044	15.0364	Up	0.00424012	0.0128682
lnc-ANO6-2	673	0	17	0.001	33.4689	15.0305	Up	1.93e-06	1.41e-05
lnc-MAS1L-1	238	0	6	0.001	33.4027	15.0277	Up	0.00915346	0.0250714
lnc-OGFRL1-10	873	0	22	0.001	33.3899	15.0271	Up	4.11e-08	4.25e-07
lnc-AHNAK2-9	358	0	9	0.001	33.3094	15.0236	Up	0.000909842	0.00337634
lnc-TAF5L-4	597	0	15	0.001	33.2908	15.0228	Up	8.99e-06	5.64e-05
lnc-STX17-3	279	0	7	0.001	33.2431	15.0208	Up	0.00424012	0.0131
lnc-TGFB1-3	279	0	7	0.001	33.2431	15.0208	Up	0.00424012	0.0129214
lnc-KCTD13-3	1799	0	45	0.001	33.1428	15.0164	Up	8.46e-16	2.89e-14
lnc-GSDMC-4	520	0	13	0.001	33.1243	15.0156	Up	4.19e-05	0.000223641
lnc-CREB3L4-2	880	0	22	0.001	33.1243	15.0156	Up	4.11e-08	4.25e-07
lnc-NAA40-1	360	0	9	0.001	33.1243	15.0156	Up	0.000909842	0.00334813
lnc-YTHDF1-4	1965	0	49	0.001	33.0401	15.0119	Up	3.9e-17	1.64e-15
lnc-DGCR14-3	803	0	20	0.001	33.0006	15.0102	Up	1.92e-07	1.75e-06
WFDC10A	482	0	12	0.001	32.9869	15.0096	Up	9.04e-05	0.000445668
lnc-GNPAT-2	402	0	10	0.001	32.9595	15.0084	Up	0.000421462	0.00171953
KRTAP2-4	764	0	19	0.001	32.9509	15.008	Up	4.14e-07	3.54e-06
lnc-LZTS1-1	764	0	19	0.001	32.9509	15.008	Up	4.14e-07	3.52e-06
lnc-RP11-43D2.2.1-2	563	0	14	0.001	32.9478	15.0079	Up	1.94e-05	0.000113613
lnc-SDK2-1	403	0	10	0.001	32.8778	15.0048	Up	0.000421462	0.00173672
lnc-PTPLB-1	403	0	10	0.001	32.8778	15.0048	Up	0.000421462	0.00173592
lnc-SCAF8-7	726	0	18	0.001	32.8506	15.0036	Up	8.94e-07	7.11e-06
lnc-RNF14-3	686	0	17	0.001	32.8346	15.0029	Up	1.93e-06	1.4e-05
lnc-PCGF3-1	767	0	19	0.001	32.822	15.0024	Up	4.14e-07	3.51e-06
lnc-RP11-105C20.2.1-9	323	0	8	0.001	32.8167	15.0021	Up	0.00196414	0.00669129
lnc-FAM82A2-6	525	0	13	0.001	32.8089	15.0018	Up	4.19e-05	0.00022693
lnc-RP11-712L6.5.1-3	566	0	14	0.001	32.7732	15.0002	Up	1.94e-05	0.000113465
lnc-STXBP1-1	849	0	21	0.001	32.7732	15.0002	Up	8.88e-08	8.61e-07
lnc-AC011294.3.1-5	405	0	10	0.001	32.7154	14.9977	Up	0.000421462	0.0017214
lnc-DUSP14-4	1014	0	25	0.001	32.667	14.9955	Up	4.09e-09	5.08e-08
CNFN	528	0	13	0.001	32.6225	14.9936	Up	4.19e-05	0.000225489
CBR1	1952	0	48	0.001	32.5813	14.9918	Up	8.41e-17	3.39e-15
lnc-EIF3G-4	529	0	13	0.001	32.5608	14.9908	Up	4.19e-05	0.000223667
lnc-LTBR-2	407	0	10	0.001	32.5546	14.9906	Up	0.000421462	0.00175182
lnc-C12orf73-2	1914	0	47	0.001	32.5359	14.9897	Up	1.82e-16	6.9e-15
lnc-CYB5A-1	1184	0	29	0.001	32.4529	14.9861	Up	1.88e-10	2.95e-09
lnc-SLC12A3-2	2164	0	53	0.001	32.4508	14.986	Up	1.79e-18	8.85e-17
lnc-MXD3-1	245	0	6	0.001	32.4483	14.9859	Up	0.00915346	0.0254484
lnc-GALNT1-2	2084	0	51	0.001	32.425	14.9848	Up	8.36e-18	3.8e-16
lnc-CCNL2-4	695	0	17	0.001	32.4094	14.9841	Up	1.93e-06	1.42e-05
lnc-SLC27A5-3	409	0	10	0.001	32.3954	14.9835	Up	0.000421462	0.00171098
lnc-WDR60-9	860	0	21	0.001	32.354	14.9817	Up	8.88e-08	8.63e-07
lnc-MIPOL1-1	738	0	18	0.001	32.3164	14.98	Up	8.94e-07	7.08e-06
lnc-C10orf103-7	656	0	16	0.001	32.3164	14.98	Up	4.16e-06	2.83e-05
C15orf32	1764	0	43	0.001	32.2981	14.9792	Up	3.94e-15	1.23e-13
lnc-SPAG9-1	2054	0	50	0.001	32.2535	14.9772	Up	1.81e-17	7.9e-16
MRPL9	1688	0	41	0.001	32.1824	14.974	Up	1.84e-14	5.26e-13
lnc-RP11-43D2.2.1-7	206	0	5	0.001	32.1596	14.973	Up	0.0197602	0.0475337
lnc-AC024563.1-6	618	0	15	0.001	32.1596	14.973	Up	8.99e-06	5.61e-05
NXNL1	908	0	22	0.001	32.1029	14.9704	Up	4.11e-08	4.27e-07
lnc-PEX19-2	578	0	14	0.001	32.0928	14.97	Up	1.94e-05	0.000114074
lnc-MALT1-5	578	0	14	0.001	32.0928	14.97	Up	1.94e-05	0.000112644
lnc-MAP4K3-2	826	0	20	0.001	32.0817	14.9695	Up	1.92e-07	1.75e-06
lnc-CEBPB-9	661	0	16	0.001	32.072	14.969	Up	4.16e-06	2.84e-05
lnc-RTKN2-3	744	0	18	0.001	32.0558	14.9683	Up	8.94e-07	7.04e-06
LOC100422556	455	0	11	0.001	32.0323	14.9672	Up	0.000195233	0.000873473
lnc-RP11-322L20.1.1-4	746	0	18	0.001	31.9699	14.9644	Up	8.94e-07	7.13e-06
lnc-RALB-2	373	0	9	0.001	31.9699	14.9644	Up	0.000909842	0.00341242
lnc-ARRDC2-1	664	0	16	0.001	31.9271	14.9625	Up	4.16e-06	2.84e-05
lnc-ZNF716-21	208	0	5	0.001	31.8503	14.959	Up	0.0197602	0.048004
lnc-ATP6V1H-6	749	0	18	0.001	31.8418	14.9586	Up	8.94e-07	7.06e-06
lnc-CTDSP2-2	2247	0	54	0.001	31.8418	14.9586	Up	8.31e-19	4.28e-17
lnc-NUMA1-2	541	0	13	0.001	31.8386	14.9585	Up	4.19e-05	0.000222899
lnc-KLHL25-17	1835	0	44	0.001	31.7705	14.9554	Up	1.83e-15	5.96e-14
lnc-ZCCHC10-1	459	0	11	0.001	31.7532	14.9546	Up	0.000195233	0.000875479
lnc-ZFAND3-5	919	0	22	0.001	31.7186	14.953	Up	4.11e-08	4.28e-07
C21orf140	961	0	23	0.001	31.7111	14.9527	Up	1.91e-08	2.09e-07
lnc-SSX5-1	293	0	7	0.001	31.6547	14.9501	Up	0.00424012	0.013091
lnc-PIGX-1	586	0	14	0.001	31.6547	14.9501	Up	1.94e-05	0.000111921
lnc-EGR1-4	335	0	8	0.001	31.6412	14.9495	Up	0.00196414	0.00663644
lnc-ZNF227-2	713	0	17	0.001	31.5912	14.9472	Up	1.93e-06	1.4e-05
lnc-RP11-826N14.2.1-4	1511	0	36	0.001	31.5679	14.9462	Up	8.62e-13	1.92e-11
lnc-NPM1-2	294	0	7	0.001	31.547	14.9452	Up	0.00424012	0.0128777
lnc-NSUN2-4	336	0	8	0.001	31.547	14.9452	Up	0.00196414	0.00660911
lnc-ARF6-10	2315	0	55	0.001	31.4789	14.9421	Up	3.85e-19	2.08e-17
lnc-TMEM169-1	421	0	10	0.001	31.4721	14.9418	Up	0.000421462	0.0017299
lnc-DYSF-5	842	0	20	0.001	31.4721	14.9418	Up	1.92e-07	1.74e-06
lnc-KCTD3-1	800	0	19	0.001	31.4681	14.9416	Up	4.14e-07	3.54e-06
lnc-VRK1-6	253	0	6	0.001	31.4223	14.9395	Up	0.00915346	0.0247114
lnc-C16orf89-1	338	0	8	0.001	31.3603	14.9367	Up	0.00196414	0.00667056
lnc-RUFY1-4	1479	0	35	0.001	31.355	14.9364	Up	1.86e-12	3.93e-11
OR6T1	972	0	23	0.001	31.3523	14.9363	Up	1.91e-08	2.11e-07
lnc-C1orf50-1	465	0	11	0.001	31.3435	14.9359	Up	0.000195233	0.000869404
lnc-GTF2F2-10	296	0	7	0.001	31.3338	14.9354	Up	0.00424012	0.0130488
lnc-RP11-467M13.1.1-9	296	0	7	0.001	31.3338	14.9354	Up	0.00424012	0.0129689
lnc-AL162389.1-3	296	0	7	0.001	31.3338	14.9354	Up	0.00424012	0.0128404
lnc-FABP3-3	423	0	10	0.001	31.3233	14.9349	Up	0.000421462	0.00174263
HGC6.3	1016	0	24	0.001	31.2986	14.9338	Up	8.83e-09	1.03e-07
lnc-C14orf23-6	551	0	13	0.001	31.2607	14.9321	Up	4.19e-05	0.000225679
lnc-PLA2G15-3	212	0	5	0.001	31.2494	14.9315	Up	0.0197602	0.0478282
lnc-CRTAP-2	297	0	7	0.001	31.2283	14.9306	Up	0.00424012	0.0127792
lnc-CCDC57-2	637	0	15	0.001	31.2003	14.9293	Up	8.99e-06	5.62e-05
lnc-C2CD4B-1	850	0	20	0.001	31.1759	14.9281	Up	1.92e-07	1.73e-06
lnc-CTD-3080F16.3.1-1	255	0	6	0.001	31.1759	14.9281	Up	0.00915346	0.0248773
CXCL17	853	0	20	0.001	31.0662	14.9231	Up	1.92e-07	1.73e-06
lnc-FOXD4L5-3	256	0	6	0.001	31.0541	14.9225	Up	0.00915346	0.0254421
lnc-CHIC2-4	640	0	15	0.001	31.0541	14.9225	Up	8.99e-06	5.67e-05
lnc-EHD3-9	299	0	7	0.001	31.0194	14.9209	Up	0.00424012	0.0130363
lnc-CSF3-1	299	0	7	0.001	31.0194	14.9209	Up	0.00424012	0.0128179
lnc-PHYHD1-3	470	0	11	0.001	31.01	14.9204	Up	0.000195233	0.000875304
lnc-PHACTR1-3	342	0	8	0.001	30.9935	14.9197	Up	0.00196414	0.00663495
lnc-RNF170-8	214	0	5	0.001	30.9573	14.918	Up	0.0197602	0.0479599
lnc-ADSS-3	685	0	16	0.001	30.9483	14.9176	Up	4.16e-06	2.84e-05
lnc-RNF113A-2	772	0	18	0.001	30.8932	14.915	Up	8.94e-07	7.11e-06
lnc-RP11-22D3.1.1-3	386	0	9	0.001	30.8932	14.915	Up	0.000909842	0.00336107
lnc-LRFN3-1	558	0	13	0.001	30.8686	14.9139	Up	4.19e-05	0.000224307
lnc-FERMT1-2	1203	0	28	0.001	30.839	14.9125	Up	4.06e-10	5.94e-09
lnc-HOXB1-2	215	0	5	0.001	30.8133	14.9113	Up	0.0197602	0.0481002
lnc-SOD3-10	1376	0	32	0.001	30.8133	14.9113	Up	1.87e-11	3.36e-10
lnc-AC136428.1.1-4	560	0	13	0.001	30.7583	14.9087	Up	4.19e-05	0.000223907
lnc-SLC25A28-3	431	0	10	0.001	30.7418	14.9079	Up	0.000421462	0.00174311
VN1R4	906	0	21	0.001	30.7113	14.9065	Up	8.88e-08	8.57e-07
lnc-KLHDC7A-6	259	0	6	0.001	30.6944	14.9057	Up	0.00915346	0.0255528
lnc-IL16-4	518	0	12	0.001	30.6944	14.9057	Up	9.04e-05	0.000444887
lnc-SSPN-1	475	0	11	0.001	30.6836	14.9052	Up	0.000195233	0.000877405
lnc-PRPF18-5	475	0	11	0.001	30.6836	14.9052	Up	0.000195233	0.000874344
ZMAT2	1512	0	35	0.001	30.6707	14.9046	Up	1.86e-12	3.93e-11
LINC00350	562	0	13	0.001	30.6489	14.9035	Up	4.19e-05	0.000227232
lnc-TIAF1-3	692	0	16	0.001	30.6352	14.9029	Up	4.16e-06	2.87e-05
lnc-FAM189A1-3	1346	0	31	0.001	30.5157	14.8973	Up	4.04e-11	6.94e-10
GPR151	1260	0	29	0.001	30.4954	14.8963	Up	1.88e-10	2.92e-09
TWIST2	1176	0	27	0.001	30.4203	14.8927	Up	8.78e-10	1.23e-08
lnc-ZNF446-1	741	0	17	0.001	30.3975	14.8917	Up	1.93e-06	1.43e-05
lnc-CXorf26-5	436	0	10	0.001	30.3893	14.8913	Up	0.000421462	0.00172219
lnc-ETFA-3	262	0	6	0.001	30.3429	14.8891	Up	0.00915346	0.0255385
lnc-DERL3-2	613	0	14	0.001	30.2604	14.8851	Up	1.94e-05	0.000112224
lnc-MCM9-1	613	0	14	0.001	30.2604	14.8851	Up	1.94e-05	0.00011208
lnc-U2AF1L4-3	482	0	11	0.001	30.238	14.8841	Up	0.000195233	0.000872691
lnc-SPCS1-1	263	0	6	0.001	30.2275	14.8836	Up	0.00915346	0.0251036
lnc-NRL-4	746	0	17	0.001	30.1938	14.882	Up	1.93e-06	1.43e-05
lnc-KATNA1-2	660	0	15	0.001	30.113	14.8781	Up	8.99e-06	5.71e-05
lnc-COQ7-1	704	0	16	0.001	30.113	14.8781	Up	4.16e-06	2.84e-05
lnc-NBPF15-4	264	0	6	0.001	30.113	14.8781	Up	0.00915346	0.0249452
lnc-SLC25A38-3	353	0	8	0.001	30.0277	14.874	Up	0.00196414	0.00663594
GSS	1900	0	43	0.001	29.9862	14.872	Up	3.94e-15	1.23e-13
lnc-C9orf71-5	398	0	9	0.001	29.9617	14.8708	Up	0.000909842	0.00342443
lnc-OR51B4-4	620	0	14	0.001	29.9188	14.8688	Up	1.94e-05	0.000113288
lnc-IRS2-7	2305	0	52	0.001	29.8909	14.8674	Up	3.87e-18	1.83e-16
lnc-C2-3	266	0	6	0.001	29.8866	14.8672	Up	0.00915346	0.0256037
lnc-LRRTM1-13	488	0	11	0.001	29.8662	14.8662	Up	0.000195233	0.000886629
lnc-NKX6-1-5	222	0	5	0.001	29.8417	14.865	Up	0.0197602	0.0472453
lnc-TACR2-3	400	0	9	0.001	29.8119	14.8636	Up	0.000909842	0.00338922
lnc-C1QL1-1	267	0	6	0.001	29.7747	14.8618	Up	0.00915346	0.0250516
OVOL3	623	0	14	0.001	29.7747	14.8618	Up	1.94e-05	0.000111965
lnc-KRT15-2	579	0	13	0.001	29.749	14.8606	Up	4.19e-05	0.00022487
lnc-RBP5-2	490	0	11	0.001	29.7443	14.8603	Up	0.000195233	0.000882881
lnc-TBCD-2	401	0	9	0.001	29.7376	14.86	Up	0.000909842	0.00339626
lnc-TNPO3-2	535	0	12	0.001	29.719	14.8591	Up	9.04e-05	0.000446549
lnc-COPZ1-2	357	0	8	0.001	29.6913	14.8578	Up	0.00196414	0.0066101
lnc-SLC44A5-2	670	0	15	0.001	29.6636	14.8564	Up	8.99e-06	5.7e-05
lnc-TSTD2-5	268	0	6	0.001	29.6636	14.8564	Up	0.00915346	0.0255338
lnc-ZP4-5	448	0	10	0.001	29.5753	14.8521	Up	0.000421462	0.0017502
lnc-ANXA11-2	269	0	6	0.001	29.5533	14.851	Up	0.00915346	0.0252345
lnc-BAGE4-2	269	0	6	0.001	29.5533	14.851	Up	0.00915346	0.0250104
lnc-RARA-1	1932	0	43	0.001	29.4896	14.8479	Up	3.94e-15	1.23e-13
lnc-DLGAP4-1	1393	0	31	0.001	29.4861	14.8477	Up	4.04e-11	6.96e-10
lnc-SFSWAP-4	315	0	7	0.001	29.4439	14.8457	Up	0.00424012	0.0130417
lnc-GLRX-1	450	0	10	0.001	29.4439	14.8457	Up	0.000421462	0.00172832
lnc-AL445989.1-18	270	0	6	0.001	29.4439	14.8457	Up	0.00915346	0.0250135
lnc-PPIAL4A-3	586	0	13	0.001	29.3936	14.8432	Up	4.19e-05	0.000225733
lnc-DIP2A-1	767	0	17	0.001	29.3671	14.8419	Up	1.93e-06	1.42e-05
lnc-FAM138F-1	632	0	14	0.001	29.3507	14.8411	Up	1.94e-05	0.000113598
lnc-CDK17-7	271	0	6	0.001	29.3352	14.8403	Up	0.00915346	0.0249573
lnc-PNKP-5	226	0	5	0.001	29.3136	14.8393	Up	0.0197602	0.0482257
lnc-DNHD1-1	226	0	5	0.001	29.3136	14.8393	Up	0.0197602	0.0479133
lnc-WHSC1L1-3	407	0	9	0.001	29.2992	14.8386	Up	0.000909842	0.0034167
lnc-C10orf137-1	950	0	21	0.001	29.2889	14.8381	Up	8.88e-08	8.64e-07
lnc-CUX2-1	770	0	17	0.001	29.2527	14.8363	Up	1.93e-06	1.41e-05
lnc-AC084851.1-5	816	0	18	0.001	29.2274	14.835	Up	8.94e-07	7.07e-06
lnc-EMX2-9	816	0	18	0.001	29.2274	14.835	Up	8.94e-07	7.05e-06
lnc-GPR63-11	499	0	11	0.001	29.2078	14.8341	Up	0.000195233	0.000873299
lnc-TMEM206-1	590	0	13	0.001	29.1943	14.8334	Up	4.19e-05	0.00022633
lnc-WISP1-2	1546	0	34	0.001	29.1391	14.8307	Up	4.02e-12	8.08e-11
lnc-NCOA3-15	546	0	12	0.001	29.1203	14.8297	Up	9.04e-05	0.00044867
lnc-PDE12-1	364	0	8	0.001	29.1203	14.8297	Up	0.00196414	0.00670044
lnc-NSMCE4A-2	273	0	6	0.001	29.1203	14.8297	Up	0.00915346	0.025182
LILRA5	1365	0	30	0.001	29.1203	14.8297	Up	8.72e-11	1.43e-09
lnc-FAM57A-2	592	0	13	0.001	29.0957	14.8285	Up	4.19e-05	0.000222556
C10orf128	2050	0	45	0.001	29.0848	14.828	Up	8.46e-16	2.91e-14
lnc-GRHL2-5	548	0	12	0.001	29.014	14.8245	Up	9.04e-05	0.000446255
lnc-GATA6-1	366	0	8	0.001	28.9612	14.8218	Up	0.00196414	0.00676205
lnc-SLAMF8-2	732	0	16	0.001	28.9612	14.8218	Up	4.16e-06	2.84e-05
lnc-ZSWIM2-4	458	0	10	0.001	28.9296	14.8203	Up	0.000421462	0.00175004
ZNF192P1	1649	0	36	0.001	28.926	14.8201	Up	8.62e-13	1.91e-11
lnc-CSF3R-1	550	0	12	0.001	28.9085	14.8192	Up	9.04e-05	0.000445033
lnc-PLS1-3	275	0	6	0.001	28.9085	14.8192	Up	0.00915346	0.0249482
lnc-ATP2C2-1	596	0	13	0.001	28.9004	14.8188	Up	4.19e-05	0.000222662
lnc-AC108938.5.1-3	321	0	7	0.001	28.8935	14.8185	Up	0.00424012	0.0129627
lnc-ENOSF1-3	1605	0	35	0.001	28.8935	14.8185	Up	1.86e-12	3.91e-11
lnc-ZNF17-2	459	0	10	0.001	28.8665	14.8171	Up	0.000421462	0.00171021
lnc-POLE-1	1423	0	31	0.001	28.8645	14.817	Up	4.04e-11	7.01e-10
lnc-GATA1-2	506	0	11	0.001	28.8038	14.814	Up	0.000195233	0.000877669
lnc-C16orf95-4	276	0	6	0.001	28.8038	14.814	Up	0.00915346	0.0251281
lnc-ZNF516-12	553	0	12	0.001	28.7517	14.8114	Up	9.04e-05	0.000444936
lnc-COL21A1-6	461	0	10	0.001	28.7413	14.8108	Up	0.000421462	0.00173863
lnc-BTD-1	830	0	18	0.001	28.7344	14.8105	Up	8.94e-07	7.04e-06
lnc-MEOX1-2	323	0	7	0.001	28.7146	14.8095	Up	0.00424012	0.0130016
lnc-GPR141-1	646	0	14	0.001	28.7146	14.8095	Up	1.94e-05	0.000111878
lnc-LRFN3-4	600	0	13	0.001	28.7078	14.8092	Up	4.19e-05	0.000223774
lnc-MPV17L-1	554	0	12	0.001	28.6998	14.8088	Up	9.04e-05	0.000447632
lnc-PPFIA2-4	554	0	12	0.001	28.6998	14.8088	Up	9.04e-05	0.000440498
lnc-GPR26-3	647	0	14	0.001	28.6702	14.8073	Up	1.94e-05	0.000114059
lnc-PHF20L1-2	601	0	13	0.001	28.66	14.8068	Up	4.19e-05	0.000223375
lnc-TMEM108-1	555	0	12	0.001	28.6481	14.8062	Up	9.04e-05	0.000449017
lnc-CNTRL-3	509	0	11	0.001	28.634	14.8054	Up	0.000195233	0.000872604
lnc-SOX14-3	602	0	13	0.001	28.6124	14.8044	Up	4.19e-05	0.000227149
lnc-CCDC28A-2	417	0	9	0.001	28.5966	14.8036	Up	0.000909842	0.00342558
lnc-HS3ST3B1-4	371	0	8	0.001	28.5709	14.8023	Up	0.00196414	0.00675222
lnc-COL4A4-1	742	0	16	0.001	28.5709	14.8023	Up	4.16e-06	2.86e-05
lnc-PTPRZ1-3	743	0	16	0.001	28.5324	14.8003	Up	4.16e-06	2.86e-05
lnc-ODC1-2	697	0	15	0.001	28.5145	14.7994	Up	8.99e-06	5.71e-05
lnc-DPM2-1	744	0	16	0.001	28.4941	14.7984	Up	4.16e-06	2.83e-05
lnc-SCYL3-2	792	0	17	0.001	28.4401	14.7956	Up	1.93e-06	1.41e-05
COMMD7	1911	0	41	0.001	28.427	14.795	Up	1.84e-14	5.28e-13
TAPBPL	1818	0	39	0.001	28.4235	14.7948	Up	8.57e-14	2.21e-12
lnc-C1orf109-1	747	0	16	0.001	28.3796	14.7926	Up	4.16e-06	2.84e-05
lnc-UBLCP1-8	607	0	13	0.001	28.3767	14.7924	Up	4.19e-05	0.000226794
lnc-ERGIC3-1	981	0	21	0.001	28.3633	14.7917	Up	8.88e-08	8.65e-07
lnc-ZNF518B-2	514	0	11	0.001	28.3555	14.7913	Up	0.000195233	0.000873212
lnc-JAM2-1	1216	0	26	0.001	28.33	14.79	Up	1.89e-09	2.49e-08
lnc-FBXO8-5	1824	0	39	0.001	28.33	14.79	Up	8.57e-14	2.2e-12
lnc-PIGP-5	608	0	13	0.001	28.33	14.79	Up	4.19e-05	0.000223163
lnc-CIT-10	1357	0	29	0.001	28.3156	14.7893	Up	1.88e-10	2.94e-09
lnc-ADAM11-2	562	0	12	0.001	28.2913	14.7881	Up	9.04e-05	0.000441695
lnc-VTI1A-7	656	0	14	0.001	28.2769	14.7873	Up	1.94e-05	0.000113569
lnc-SYT1-2	516	0	11	0.001	28.2456	14.7857	Up	0.000195233	0.000885465
lnc-DEPDC4-2	235	0	5	0.001	28.1909	14.7829	Up	0.0197602	0.0491358
lnc-CCDC136-2	235	0	5	0.001	28.1909	14.7829	Up	0.0197602	0.0486645
lnc-GEMIN4-4	517	0	11	0.001	28.1909	14.7829	Up	0.000195233	0.000882082
lnc-BTG1-2	517	0	11	0.001	28.1909	14.7829	Up	0.000195233	0.000876266
lnc-LY86-7	282	0	6	0.001	28.1909	14.7829	Up	0.00915346	0.0250333
lnc-WDR7-9	611	0	13	0.001	28.1909	14.7829	Up	4.19e-05	0.000222925
lnc-SCML1-1	1554	0	33	0.001	28.1365	14.7802	Up	8.67e-12	1.66e-10
lnc-CD93-1	424	0	9	0.001	28.1244	14.7795	Up	0.000909842	0.00342931
lnc-PXMP4-5	377	0	8	0.001	28.1162	14.7791	Up	0.00196414	0.00670655
lnc-PLXNA2-5	330	0	7	0.001	28.1055	14.7786	Up	0.00424012	0.0129363
lnc-HSP90AA1-1	566	0	12	0.001	28.0913	14.7778	Up	9.04e-05	0.000448868
lnc-IQCG-14	802	0	17	0.001	28.0855	14.7775	Up	1.93e-06	1.42e-05
lnc-REV1-1	236	0	5	0.001	28.0715	14.7768	Up	0.0197602	0.0483386
lnc-SUSD1-5	236	0	5	0.001	28.0715	14.7768	Up	0.0197602	0.0481263
lnc-NCOA3-6	425	0	9	0.001	28.0583	14.7761	Up	0.000909842	0.00340503
lnc-CCDC41-2	567	0	12	0.001	28.0418	14.7753	Up	9.04e-05	0.00044778
lnc-RLBP1-5	567	0	12	0.001	28.0418	14.7753	Up	9.04e-05	0.000441887
lnc-SMARCAD1-1	331	0	7	0.001	28.0206	14.7742	Up	0.00424012	0.0131379
lnc-DEFB1-2	473	0	10	0.001	28.0121	14.7738	Up	0.000421462	0.00171361
lnc-ACBD6-3	710	0	15	0.001	27.9924	14.7727	Up	8.99e-06	5.7e-05
lnc-COX10-8	852	0	18	0.001	27.9924	14.7727	Up	8.94e-07	7.02e-06
lnc-NKX2-5-5	379	0	8	0.001	27.9678	14.7715	Up	0.00196414	0.00667459
lnc-CALML5-3	995	0	21	0.001	27.9643	14.7713	Up	8.88e-08	8.61e-07
lnc-CELF6-2	616	0	13	0.001	27.9621	14.7712	Up	4.19e-05	0.000222294
lnc-UGT8-8	237	0	5	0.001	27.953	14.7707	Up	0.0197602	0.0484467
lnc-SLC30A1-1	711	0	15	0.001	27.953	14.7707	Up	8.99e-06	5.66e-05
lnc-FSHR-5	237	0	5	0.001	27.953	14.7707	Up	0.0197602	0.0477304
lnc-HAAO-4	569	0	12	0.001	27.9432	14.7702	Up	9.04e-05	0.000449315
lnc-OR2J2-2	332	0	7	0.001	27.9362	14.7698	Up	0.00424012	0.0130919
lnc-PIPOX-3	332	0	7	0.001	27.9362	14.7698	Up	0.00424012	0.0127578
lnc-ZNF577-2	617	0	13	0.001	27.9168	14.7688	Up	4.19e-05	0.000223428
LOC101927296	902	0	19	0.001	27.9096	14.7685	Up	4.14e-07	3.52e-06
lnc-C1orf31-10	570	0	12	0.001	27.8942	14.7677	Up	9.04e-05	0.000449116
lnc-C19orf46-1	713	0	15	0.001	27.8746	14.7667	Up	8.99e-06	5.62e-05
lnc-RGMB-7	523	0	11	0.001	27.8675	14.7663	Up	0.000195233	0.000886002
lnc-ATG16L1-3	571	0	12	0.001	27.8453	14.7651	Up	9.04e-05	0.00044601
lnc-ZNF286A-1	571	0	12	0.001	27.8453	14.7651	Up	9.04e-05	0.000441263
lnc-RPL7A-2	476	0	10	0.001	27.8356	14.7646	Up	0.000421462	0.00174826
lnc-TTC24-3	476	0	10	0.001	27.8356	14.7646	Up	0.000421462	0.00171455
SYNDIG1	2523	0	53	0.001	27.8334	14.7645	Up	1.79e-18	8.83e-17
lnc-KIAA1598-1	2286	0	48	0.001	27.821	14.7639	Up	8.41e-17	3.4e-15
lnc-PARM1-2	286	0	6	0.001	27.7966	14.7626	Up	0.00915346	0.0255195
lnc-ITGAX-1	1767	0	37	0.001	27.7442	14.7599	Up	3.99e-13	9.3e-12
lnc-KBTBD4-3	430	0	9	0.001	27.732	14.7593	Up	0.000909842	0.00339852
lnc-TRAF3-1	908	0	19	0.001	27.7252	14.7589	Up	4.14e-07	3.5e-06
lnc-PTPN18-2	526	0	11	0.001	27.7086	14.758	Up	0.000195233	0.000873647
PRSS3P2	862	0	18	0.001	27.6677	14.7559	Up	8.94e-07	7.12e-06
lnc-ROS1-2	958	0	20	0.001	27.6612	14.7556	Up	1.92e-07	1.75e-06
lnc-LIPF-1	719	0	15	0.001	27.642	14.7546	Up	8.99e-06	5.69e-05
lnc-PROC-2	1007	0	21	0.001	27.631	14.754	Up	8.88e-08	8.58e-07
lnc-GTPBP1-3	1055	0	22	0.001	27.6298	14.7539	Up	4.11e-08	4.27e-07
lnc-LCNL1-1	1631	0	34	0.001	27.6205	14.7535	Up	4.02e-12	8.05e-11
lnc-S1PR2-1	288	0	6	0.001	27.6036	14.7526	Up	0.00915346	0.0250074
lnc-RP11-944C7.1.1-11	625	0	13	0.001	27.5595	14.7503	Up	4.19e-05	0.00022372
lnc-RP11-571M6.15.1-1	578	0	12	0.001	27.5081	14.7476	Up	9.04e-05	0.000448373
lnc-TMEM132B-19	289	0	6	0.001	27.5081	14.7476	Up	0.00915346	0.0253966
lnc-RIOK2-4	289	0	6	0.001	27.5081	14.7476	Up	0.00915346	0.0248217
lnc-FCHO1-1	1060	0	22	0.001	27.4995	14.7471	Up	4.11e-08	4.28e-07
lnc-AZI2-3	482	0	10	0.001	27.4891	14.7466	Up	0.000421462	0.00172548
lnc-CST6-2	241	0	5	0.001	27.4891	14.7466	Up	0.0197602	0.0477022
lnc-FAM75A4-7	482	0	10	0.001	27.4891	14.7466	Up	0.000421462	0.00172094
lnc-SHISA9-7	434	0	9	0.001	27.4764	14.7459	Up	0.000909842	0.00338361
lnc-METTL5-2	772	0	16	0.001	27.4606	14.7451	Up	4.16e-06	2.87e-05
lnc-ACOX1-1	435	0	9	0.001	27.4132	14.7426	Up	0.000909842	0.00334951
lnc-CD300A-3	2224	0	46	0.001	27.405	14.7422	Up	3.92e-16	1.42e-14
lnc-NPAS2-2	677	0	14	0.001	27.3998	14.7419	Up	1.94e-05	0.000113362
lnc-CCK-2	726	0	15	0.001	27.3755	14.7406	Up	8.99e-06	5.69e-05
lnc-RP11-262H14.4.1-10	242	0	5	0.001	27.3755	14.7406	Up	0.0197602	0.0475184
lnc-RPS12-1	581	0	12	0.001	27.3661	14.7401	Up	9.04e-05	0.00044518
lnc-ERAL1-4	436	0	9	0.001	27.3504	14.7393	Up	0.000909842	0.0033517
lnc-LRR1-5	1066	0	22	0.001	27.3447	14.739	Up	4.11e-08	4.25e-07
lnc-OR9I1-1	1890	0	39	0.001	27.3407	14.7388	Up	8.57e-14	2.2e-12
lnc-GALNTL4-2	630	0	13	0.001	27.3407	14.7388	Up	4.19e-05	0.000224013
lnc-LIMK1-1	582	0	12	0.001	27.319	14.7376	Up	9.04e-05	0.000445472
lnc-RP11-539E17.5.1-1	777	0	16	0.001	27.2839	14.7358	Up	4.16e-06	2.83e-05
lnc-AL901608.1-76	340	0	7	0.001	27.2789	14.7355	Up	0.00424012	0.0129153
lnc-AVL9-4	923	0	19	0.001	27.2746	14.7353	Up	4.14e-07	3.54e-06
lnc-KIF24-2	243	0	5	0.001	27.2628	14.7346	Up	0.0197602	0.0485182
lnc-AL590867.1-1	389	0	8	0.001	27.2488	14.7339	Up	0.00196414	0.00667308
lnc-KCNMB2-5	1605	0	33	0.001	27.2424	14.7336	Up	8.67e-12	1.66e-10
lnc-CTC-236F12.4.1-4	536	0	11	0.001	27.1916	14.7309	Up	0.000195233	0.000869749
lnc-RP4-539M6.19.1-2	244	0	5	0.001	27.1511	14.7287	Up	0.0197602	0.0487956
lnc-AL645728.1-2	244	0	5	0.001	27.1511	14.7287	Up	0.0197602	0.0475693
lnc-SPINK2-2	293	0	6	0.001	27.1326	14.7277	Up	0.00915346	0.0251496
lnc-C3orf38-5	342	0	7	0.001	27.1193	14.727	Up	0.00424012	0.0130159
lnc-ZNF705D-3	440	0	9	0.001	27.1017	14.7261	Up	0.000909842	0.00340645
lnc-APOL4-2	538	0	11	0.001	27.0905	14.7255	Up	0.000195233	0.000884037
NUDT16L1	1420	0	29	0.001	27.0593	14.7238	Up	1.88e-10	2.93e-09
lnc-SPANXN3-1	344	0	7	0.001	26.9617	14.7186	Up	0.00424012	0.0128917
lnc-RBM46-2	295	0	6	0.001	26.9486	14.7179	Up	0.00915346	0.0251635
lnc-AL901608.1-73	295	0	6	0.001	26.9486	14.7179	Up	0.00915346	0.0247262
PPIAL4G	738	0	15	0.001	26.9304	14.7169	Up	8.99e-06	5.65e-05
lnc-BUB1B-3	1870	0	38	0.001	26.9246	14.7166	Up	1.85e-13	4.57e-12
lnc-KLF6-5	1870	0	38	0.001	26.9246	14.7166	Up	1.85e-13	4.56e-12
lnc-SRPR-4	443	0	9	0.001	26.9182	14.7163	Up	0.000909842	0.00343305
lnc-TCP11L1-3	394	0	8	0.001	26.903	14.7155	Up	0.00196414	0.00663545
lnc-AJUBA-1	936	0	19	0.001	26.8958	14.7151	Up	4.14e-07	3.51e-06
lnc-AC233282.2-2	345	0	7	0.001	26.8835	14.7144	Up	0.00424012	0.013109
lnc-RPS24-2	345	0	7	0.001	26.8835	14.7144	Up	0.00424012	0.012869
lnc-CNTNAP1-2	345	0	7	0.001	26.8835	14.7144	Up	0.00424012	0.0127536
lnc-COPZ2-1	2910	0	59	0.001	26.8637	14.7134	Up	1.77e-20	1.09e-18
lnc-CPM-4	296	0	6	0.001	26.8576	14.713	Up	0.00915346	0.0254894
lnc-C5orf45-2	592	0	12	0.001	26.8576	14.713	Up	9.04e-05	0.000440069
lnc-HERC6-3	543	0	11	0.001	26.8411	14.7122	Up	0.000195233	0.000867598
lnc-HSPA4-7	395	0	8	0.001	26.8349	14.7118	Up	0.00196414	0.00675481
PRPS1L1	1087	0	22	0.001	26.8164	14.7108	Up	4.11e-08	4.25e-07
lnc-ZSCAN5B-1	544	0	11	0.001	26.7917	14.7095	Up	0.000195233	0.000883859
lnc-KIAA0226-8	544	0	11	0.001	26.7917	14.7095	Up	0.000195233	0.000877844
lnc-ZNF239-1	841	0	17	0.001	26.7831	14.709	Up	1.93e-06	1.42e-05
lnc-TXN2-1	594	0	12	0.001	26.7671	14.7082	Up	9.04e-05	0.000447188
lnc-CDKL4-5	297	0	6	0.001	26.7671	14.7082	Up	0.00915346	0.0253746
lnc-WI2-2994D6.2.1-1	891	0	18	0.001	26.7671	14.7082	Up	8.94e-07	7.09e-06
lnc-ZSWIM2-10	297	0	6	0.001	26.7671	14.7082	Up	0.00915346	0.0249801
lnc-HIATL1-13	396	0	8	0.001	26.7671	14.7082	Up	0.00196414	0.00659232
lnc-CTR9-7	1387	0	28	0.001	26.7478	14.7071	Up	4.06e-10	5.93e-09
lnc-RP11-366L20.2.1-5	545	0	11	0.001	26.7426	14.7069	Up	0.000195233	0.000886718
lnc-ZNF586-1	545	0	11	0.001	26.7426	14.7069	Up	0.000195233	0.000868199
lnc-MOSPD1-2	1140	0	23	0.001	26.7319	14.7063	Up	1.91e-08	2.1e-07
lnc-PHF10-4	694	0	14	0.001	26.7286	14.7061	Up	1.94e-05	0.000113097
lnc-PLD3-2	347	0	7	0.001	26.7286	14.7061	Up	0.00424012	0.0128543
lnc-NBPF6-2	2331	0	47	0.001	26.7155	14.7054	Up	1.82e-16	6.89e-15
lnc-D87017.1-3	248	0	5	0.001	26.7132	14.7053	Up	0.0197602	0.0488735
lnc-TP53INP1-2	794	0	16	0.001	26.6997	14.7045	Up	4.16e-06	2.85e-05
lnc-COLEC12-3	397	0	8	0.001	26.6997	14.7045	Up	0.00196414	0.0066847
lnc-PARP1-4	348	0	7	0.001	26.6518	14.7019	Up	0.00424012	0.0129654
lnc-PFKP-20	597	0	12	0.001	26.6326	14.7009	Up	9.04e-05	0.000447533
lnc-PCMTD2-2	498	0	10	0.001	26.6059	14.6995	Up	0.000421462	0.00171129
lnc-C2orf72-1	598	0	12	0.001	26.5881	14.6985	Up	9.04e-05	0.000444012
lnc-CLDN16-2	499	0	10	0.001	26.5526	14.6966	Up	0.000421462	0.00173449
lnc-EPN1-1	799	0	16	0.001	26.5326	14.6955	Up	4.16e-06	2.86e-05
lnc-EIF5AL1-1	949	0	19	0.001	26.5274	14.6952	Up	4.14e-07	3.51e-06
lnc-NKX1-1-3	700	0	14	0.001	26.4995	14.6937	Up	1.94e-05	0.000114104
lnc-TBL1XR1-12	250	0	5	0.001	26.4995	14.6937	Up	0.0197602	0.0489058
lnc-WFDC2-2	400	0	8	0.001	26.4995	14.6937	Up	0.00196414	0.00672136
lnc-VPREB1-11	250	0	5	0.001	26.4995	14.6937	Up	0.0197602	0.0484494
lnc-ZNF736-1	550	0	11	0.001	26.4995	14.6937	Up	0.000195233	0.000875741
lnc-SAFB2-2	300	0	6	0.001	26.4995	14.6937	Up	0.00915346	0.0249922
lnc-AL138831.1-3	300	0	6	0.001	26.4995	14.6937	Up	0.00915346	0.024759
LOC102724297	951	0	19	0.001	26.4716	14.6922	Up	4.14e-07	3.49e-06
lnc-SMAD4-1	901	0	18	0.001	26.4701	14.6921	Up	8.94e-07	7.09e-06
lnc-AHR-8	551	0	11	0.001	26.4514	14.6911	Up	0.000195233	0.000868801
lnc-APLP1-2	351	0	7	0.001	26.424	14.6896	Up	0.00424012	0.0127964
lnc-PKLR-1	301	0	6	0.001	26.4114	14.6889	Up	0.00915346	0.0250638
lnc-ZKSCAN1-1	803	0	16	0.001	26.4005	14.6883	Up	4.16e-06	2.83e-05
lnc-RFX1-2	502	0	10	0.001	26.3939	14.6879	Up	0.000421462	0.00172423
lnc-TBC1D3F-3	201	0	4	0.001	26.3676	14.6865	Up	0.0426578	0.0910292
lnc-ZNF133-2	1459	0	29	0.001	26.336	14.6847	Up	1.88e-10	2.94e-09
lnc-LHX2-4	302	0	6	0.001	26.324	14.6841	Up	0.00915346	0.0254469
lnc-ARHGEF6-1	655	0	13	0.001	26.2972	14.6826	Up	4.19e-05	0.000225652
lnc-C16orf73-1	252	0	5	0.001	26.2892	14.6822	Up	0.0197602	0.048957
lnc-SEPN1-2	4289	0	85	0.001	26.2585	14.6805	Up	3.62e-29	5.48e-27
lnc-NMNAT3-2	607	0	12	0.001	26.1939	14.6769	Up	9.04e-05	0.000444595
lnc-IGF1-1	405	0	8	0.001	26.1723	14.6758	Up	0.00196414	0.00673059
lnc-TAF1L-6	709	0	14	0.001	26.1631	14.6752	Up	1.94e-05	0.000113791
lnc-PSMB7-3	304	0	6	0.001	26.1508	14.6746	Up	0.00915346	0.0251804
lnc-RNF151-1	507	0	10	0.001	26.1336	14.6736	Up	0.000421462	0.00172784
lnc-AKAP13-3	558	0	11	0.001	26.1196	14.6728	Up	0.000195233	0.000871045
lnc-GABPA-1	1573	0	31	0.001	26.112	14.6724	Up	4.04e-11	7e-10
lnc-NAA35-9	1218	0	24	0.001	26.1079	14.6722	Up	8.83e-09	1.03e-07
lnc-COL4A3-4	559	0	11	0.001	26.0728	14.6703	Up	0.000195233	0.000872171
lnc-EPN3-1	559	0	11	0.001	26.0728	14.6703	Up	0.000195233	0.000870008
lnc-ZNF510-4	305	0	6	0.001	26.0651	14.6698	Up	0.00915346	0.0255544
lnc-ZNF93-1	763	0	15	0.001	26.048	14.6689	Up	8.99e-06	5.63e-05
lnc-CPEB2-15	1577	0	31	0.001	26.0458	14.6688	Up	4.04e-11	7.01e-10
lnc-CORO6-2	407	0	8	0.001	26.0437	14.6686	Up	0.00196414	0.00658592
lnc-DNMT3A-3	865	0	17	0.001	26.0399	14.6684	Up	1.93e-06	1.42e-05
lnc-CCAR1-1	611	0	12	0.001	26.0224	14.6675	Up	9.04e-05	0.000446108
lnc-RAB40AL-2	612	0	12	0.001	25.9799	14.6651	Up	9.04e-05	0.000446648
lnc-DPCD-1	306	0	6	0.001	25.9799	14.6651	Up	0.00915346	0.0251189
lnc-REG3A-4	1225	0	24	0.001	25.9587	14.6639	Up	8.83e-09	1.03e-07
lnc-HMGCLL1-3	664	0	13	0.001	25.9407	14.6629	Up	4.19e-05	0.000223853
lnc-KIF20B-4	613	0	12	0.001	25.9375	14.6628	Up	9.04e-05	0.000442176
lnc-CDK5-1	511	0	10	0.001	25.929	14.6623	Up	0.000421462	0.00171657
lnc-EFCAB2-4	307	0	6	0.001	25.8953	14.6604	Up	0.00915346	0.0249376
lnc-BUD13-1	921	0	18	0.001	25.8953	14.6604	Up	8.94e-07	7.04e-06
lnc-GSDMC-11	461	0	9	0.001	25.8672	14.6588	Up	0.000909842	0.00340901
LOC105616981	922	0	18	0.001	25.8672	14.6588	Up	8.94e-07	7.08e-06
lnc-AC217773.1-1	666	0	13	0.001	25.8628	14.6586	Up	4.19e-05	0.00022388
lnc-NPC1L1-1	308	0	6	0.001	25.8112	14.6557	Up	0.00915346	0.0248382
lnc-CDH17-1	668	0	13	0.001	25.7854	14.6543	Up	4.19e-05	0.000227122
lnc-ANXA6-4	566	0	11	0.001	25.7504	14.6523	Up	0.000195233	0.000877054
BLZF1	2316	0	45	0.001	25.7443	14.652	Up	8.46e-16	2.9e-14
lnc-GPR83-2	309	0	6	0.001	25.7276	14.651	Up	0.00915346	0.0249029
lnc-CIB4-3	567	0	11	0.001	25.705	14.6498	Up	0.000195233	0.000887706
lnc-FLNB-2	361	0	7	0.001	25.692	14.649	Up	0.00424012	0.0128292
lnc-MTHFS-4	361	0	7	0.001	25.692	14.649	Up	0.00424012	0.0128016
lnc-MTHFD1-4	672	0	13	0.001	25.6319	14.6457	Up	4.19e-05	0.000222241
lnc-BUB1B-4	517	0	10	0.001	25.6281	14.6454	Up	0.000421462	0.0017161
lnc-IDH2-2	362	0	7	0.001	25.621	14.645	Up	0.00424012	0.013188
lnc-CYSLTR2-1	207	0	4	0.001	25.6034	14.644	Up	0.0426578	0.0917658
lnc-C9orf93-2	414	0	8	0.001	25.6034	14.644	Up	0.00196414	0.00658641
lnc-PPIC-3	674	0	13	0.001	25.5559	14.6414	Up	4.19e-05	0.000223534
lnc-INO80D-4	467	0	9	0.001	25.5348	14.6402	Up	0.000909842	0.00341128
lnc-TUBGCP4-2	519	0	10	0.001	25.5294	14.6399	Up	0.000421462	0.00172501
lnc-RBM28-4	364	0	7	0.001	25.4803	14.6371	Up	0.00424012	0.0130132
lnc-AL445989.1-3	416	0	8	0.001	25.4803	14.6371	Up	0.00196414	0.00661208
lnc-MPZ-1	1093	0	21	0.001	25.4569	14.6358	Up	8.88e-08	8.56e-07
lnc-PPP1R12B-5	782	0	15	0.001	25.4151	14.6334	Up	8.99e-06	5.68e-05
lnc-ZFAND1-1	627	0	12	0.001	25.3583	14.6302	Up	9.04e-05	0.000448076
lnc-NID2-4	889	0	17	0.001	25.337	14.629	Up	1.93e-06	1.4e-05
ZNF77	2040	0	39	0.001	25.3304	14.6286	Up	8.57e-14	2.2e-12
lnc-UBR7-2	314	0	6	0.001	25.318	14.6279	Up	0.00915346	0.0254437
lnc-PITPNC1-7	314	0	6	0.001	25.318	14.6279	Up	0.00915346	0.0247948
lnc-ANKK1-1	524	0	10	0.001	25.2858	14.626	Up	0.000421462	0.00174183
lnc-PDCD11-2	524	0	10	0.001	25.2858	14.626	Up	0.000421462	0.00172281
lnc-ZCCHC17-13	1730	0	33	0.001	25.2741	14.6254	Up	8.67e-12	1.65e-10
lnc-C8orf42-4	630	0	12	0.001	25.2376	14.6233	Up	9.04e-05	0.00044862
lnc-COPG-1	210	0	4	0.001	25.2376	14.6233	Up	0.0426578	0.0894154
lnc-GRAMD4-4	3205	0	61	0.001	25.2179	14.6222	Up	3.8e-21	2.55e-19
lnc-CNGB1-3	473	0	9	0.001	25.2109	14.6218	Up	0.000909842	0.0034039
lnc-GPR56-2	368	0	7	0.001	25.2033	14.6213	Up	0.00424012	0.0129048
lnc-CLLU1.1-6	894	0	17	0.001	25.1952	14.6209	Up	1.93e-06	1.4e-05
lnc-OTUD6B-6	263	0	5	0.001	25.1896	14.6205	Up	0.0197602	0.0491549
lnc-DHX34-1	263	0	5	0.001	25.1896	14.6205	Up	0.0197602	0.048095
lnc-CERS4-4	737	0	14	0.001	25.1691	14.6194	Up	1.94e-05	0.00011298
lnc-GCNT2-3	527	0	10	0.001	25.1418	14.6178	Up	0.000421462	0.00173069
lnc-KBTBD2-1	264	0	5	0.001	25.0942	14.6151	Up	0.0197602	0.0485129
lnc-NKX1-1-5	264	0	5	0.001	25.0942	14.6151	Up	0.0197602	0.0479211
lnc-AC016251.1-22	528	0	10	0.001	25.0942	14.6151	Up	0.000421462	0.00170944
lnc-CSRNP3-6	317	0	6	0.001	25.0784	14.6142	Up	0.00915346	0.0255989
lnc-FBXL7-7	634	0	12	0.001	25.0784	14.6142	Up	9.04e-05	0.000443818
lnc-MBOAT4-7	317	0	6	0.001	25.0784	14.6142	Up	0.00915346	0.0248023
lnc-TMEM132C-5	423	0	8	0.001	25.0586	14.613	Up	0.00196414	0.00667005
lnc-RGAG1-4	2274	0	43	0.001	25.0545	14.6128	Up	3.94e-15	1.24e-13
lnc-KATNAL2-5	2117	0	40	0.001	25.0349	14.6117	Up	3.97e-14	1.07e-12
lnc-KLHL31-2	3706	0	70	0.001	25.0265	14.6112	Up	3.74e-24	3.45e-22
lnc-ATP6AP2-6	265	0	5	0.001	24.9995	14.6096	Up	0.0197602	0.0486165
lnc-C15orf41-7	689	0	13	0.001	24.9995	14.6096	Up	4.19e-05	0.0002253
lnc-ANK2-5	424	0	8	0.001	24.9995	14.6096	Up	0.00196414	0.00666099
lnc-PTCRA-1	637	0	12	0.001	24.9603	14.6073	Up	9.04e-05	0.000446746
lnc-OXT-1	425	0	8	0.001	24.9407	14.6062	Up	0.00196414	0.00659281
lnc-MCHR2-2	372	0	7	0.001	24.9323	14.6057	Up	0.00424012	0.0131461
lnc-XRCC2-5	319	0	6	0.001	24.9211	14.6051	Up	0.00915346	0.0247099
lnc-GAMT-3	213	0	4	0.001	24.8821	14.6028	Up	0.0426578	0.0915904
lnc-CHST6-1	852	0	16	0.001	24.8821	14.6028	Up	4.16e-06	2.83e-05
DPCD	799	0	15	0.001	24.8743	14.6024	Up	8.99e-06	5.64e-05
lnc-INSIG1-2	1066	0	20	0.001	24.8588	14.6015	Up	1.92e-07	1.75e-06
lnc-C4orf21-1	640	0	12	0.001	24.8433	14.6006	Up	9.04e-05	0.000442706
lnc-CA9-2	267	0	5	0.001	24.8122	14.5988	Up	0.0197602	0.0491413
lnc-SOCS4-1	534	0	10	0.001	24.8122	14.5988	Up	0.000421462	0.00174617
BIRC6-AS2	588	0	11	0.001	24.7869	14.5973	Up	0.000195233	0.000883414
lnc-SLC7A6-1	428	0	8	0.001	24.7659	14.5961	Up	0.00196414	0.00662349
lnc-DMRTA2-9	214	0	4	0.001	24.7659	14.5961	Up	0.0426578	0.0897294
lnc-C6orf146-4	482	0	9	0.001	24.7402	14.5946	Up	0.000909842	0.00338754
lnc-ALPK3-1	429	0	8	0.001	24.7081	14.5927	Up	0.00196414	0.0067818
LOC102724321	429	0	8	0.001	24.7081	14.5927	Up	0.00196414	0.00666904
lnc-NCR1-3	590	0	11	0.001	24.7029	14.5924	Up	0.000195233	0.000885287
OR14J1	966	0	18	0.001	24.6889	14.5916	Up	8.94e-07	7.11e-06
lnc-PCID2-4	1449	0	27	0.001	24.6889	14.5916	Up	8.78e-10	1.22e-08
lnc-BBS5-2	376	0	7	0.001	24.6671	14.5903	Up	0.00424012	0.0128647
lnc-MAB21L3-1	914	0	17	0.001	24.6439	14.5889	Up	1.93e-06	1.41e-05
lnc-SLC6A9-11	269	0	5	0.001	24.6278	14.588	Up	0.0197602	0.0477433
lnc-CYTH4-6	592	0	11	0.001	24.6194	14.5875	Up	0.000195233	0.000869663
lnc-AC003101.1.1-7	323	0	6	0.001	24.6125	14.5871	Up	0.00915346	0.0251143
lnc-LIN54-1	2585	0	48	0.001	24.603	14.5865	Up	8.41e-17	3.37e-15
lnc-MARCH6-5	377	0	7	0.001	24.6016	14.5865	Up	0.00424012	0.0129795
lnc-ARHGAP26-7	377	0	7	0.001	24.6016	14.5865	Up	0.00424012	0.0127604
lnc-LRRC4C-8	808	0	15	0.001	24.5973	14.5862	Up	8.99e-06	5.65e-05
lnc-RIPK1-4	485	0	9	0.001	24.5871	14.5856	Up	0.000909842	0.00337606
lnc-SLC15A3-1	864	0	16	0.001	24.5365	14.5826	Up	4.16e-06	2.85e-05
lnc-EIF6-3	540	0	10	0.001	24.5365	14.5826	Up	0.000421462	0.00170975
BTNL2	1513	0	28	0.001	24.5203	14.5817	Up	4.06e-10	5.93e-09
lnc-AC015987.1-6	811	0	15	0.001	24.5063	14.5809	Up	8.99e-06	5.66e-05
lnc-IRX5-3	325	0	6	0.001	24.4611	14.5782	Up	0.00915346	0.0250837
lnc-RP11-214N1.1.1-6	325	0	6	0.001	24.4611	14.5782	Up	0.00915346	0.024924
lnc-SMYD3-3	271	0	5	0.001	24.446	14.5773	Up	0.0197602	0.0474498
lnc-FAM27B-9	217	0	4	0.001	24.4235	14.576	Up	0.0426578	0.0912851
lnc-GC-3	978	0	18	0.001	24.386	14.5738	Up	8.94e-07	7.07e-06
lnc-MRPL47-4	707	0	13	0.001	24.363	14.5724	Up	4.19e-05	0.000225922
lnc-FAM150B-1	707	0	13	0.001	24.363	14.5724	Up	4.19e-05	0.000225543
lnc-PLA2G2E-1	1306	0	24	0.001	24.3487	14.5716	Up	8.83e-09	1.02e-07
ANKRD49	1905	0	35	0.001	24.3433	14.5712	Up	1.86e-12	3.92e-11
lnc-UBQLN2-4	654	0	12	0.001	24.3114	14.5693	Up	9.04e-05	0.000442368
lnc-C2orf65-5	763	0	14	0.001	24.3114	14.5693	Up	1.94e-05	0.000111907
lnc-RP11-342M21.2.1-2	709	0	13	0.001	24.2943	14.5683	Up	4.19e-05	0.000222189
lnc-GRAMD3-5	1091	0	20	0.001	24.2892	14.568	Up	1.92e-07	1.73e-06
lnc-AL160314.1-1	2673	0	49	0.001	24.2887	14.568	Up	3.9e-17	1.64e-15
lnc-UXS1-4	655	0	12	0.001	24.2743	14.5671	Up	9.04e-05	0.000441791
lnc-FBXO47-2	437	0	8	0.001	24.2558	14.566	Up	0.00196414	0.00676309
lnc-NCOA1-2	711	0	13	0.001	24.226	14.5643	Up	4.19e-05	0.000225787
lnc-ACMSD-4	274	0	5	0.001	24.1784	14.5614	Up	0.0197602	0.0480612
lnc-STOX2-5	822	0	15	0.001	24.1784	14.5614	Up	8.99e-06	5.63e-05
lnc-FAM75A6-4	439	0	8	0.001	24.1453	14.5595	Up	0.00196414	0.00661456
lnc-DHRS7B-6	1372	0	25	0.001	24.1431	14.5593	Up	4.09e-09	5.06e-08
NFKBIL1	1483	0	27	0.001	24.1229	14.5581	Up	8.78e-10	1.22e-08
lnc-C5orf27-1	1704	0	31	0.001	24.1046	14.557	Up	4.04e-11	6.97e-10
lnc-CCDC3-2	220	0	4	0.001	24.0904	14.5562	Up	0.0426578	0.091801
lnc-TMCO3-1	330	0	6	0.001	24.0904	14.5562	Up	0.00915346	0.0252128
lnc-DAP-9	330	0	6	0.001	24.0904	14.5562	Up	0.00915346	0.0250562
lnc-AL901608.1-21	220	0	4	0.001	24.0904	14.5562	Up	0.0426578	0.0893904
lnc-IFT20-10	1981	0	36	0.001	24.0783	14.5554	Up	8.62e-13	1.91e-11
lnc-EIF6-2	1542	0	28	0.001	24.0592	14.5543	Up	4.06e-10	5.98e-09
lnc-AKTIP-6	606	0	11	0.001	24.0507	14.5538	Up	0.000195233	0.000887346
lnc-PREX1-6	551	0	10	0.001	24.0467	14.5536	Up	0.000421462	0.00170836
ELMOD2	4409	0	80	0.001	24.0413	14.5532	Up	1.7e-27	2.18e-25
LINC01221	662	0	12	0.001	24.0176	14.5518	Up	9.04e-05	0.000448967
lnc-KLHL1-8	276	0	5	0.001	24.0031	14.5509	Up	0.0197602	0.0488546
lnc-HARS-1	884	0	16	0.001	23.9814	14.5496	Up	4.16e-06	2.86e-05
lnc-RAB1A-7	221	0	4	0.001	23.9814	14.5496	Up	0.0426578	0.0896748
lnc-TRIM29-6	553	0	10	0.001	23.9597	14.5483	Up	0.000421462	0.00171812
lnc-FAM98B-2	553	0	10	0.001	23.9597	14.5483	Up	0.000421462	0.00170897
C16orf87	1383	0	25	0.001	23.9511	14.5478	Up	4.09e-09	5.05e-08
lnc-ZCCHC6-2	443	0	8	0.001	23.9273	14.5464	Up	0.00196414	0.00674551
lnc-KIF19-1	720	0	13	0.001	23.9231	14.5461	Up	4.19e-05	0.000226466
lnc-BPI-1	277	0	5	0.001	23.9165	14.5457	Up	0.0197602	0.0487393
lnc-OR4K14-1	554	0	10	0.001	23.9165	14.5457	Up	0.000421462	0.00172847
ACSM1	2051	0	37	0.001	23.9025	14.5449	Up	3.99e-13	9.33e-12
LILRA3	1608	0	29	0.001	23.8957	14.5445	Up	1.88e-10	2.92e-09
lnc-RAB24-3	222	0	4	0.001	23.8734	14.5431	Up	0.0426578	0.0924386
lnc-ZNF737-3	3330	0	60	0.001	23.8734	14.5431	Up	8.21e-21	5.29e-19
lnc-TMEM14A-4	2445	0	44	0.001	23.8441	14.5413	Up	1.83e-15	5.97e-14
CPQ	1949	0	35	0.001	23.7938	14.5383	Up	1.86e-12	3.94e-11
ANKRD30BL	1727	0	31	0.001	23.7835	14.5377	Up	4.04e-11	7.01e-10
lnc-SSBP3-1	390	0	7	0.001	23.7816	14.5376	Up	0.00424012	0.01283
lnc-NPAS4-1	948	0	17	0.001	23.7601	14.5363	Up	1.93e-06	1.42e-05
lnc-B4GALNT3-5	502	0	9	0.001	23.7545	14.5359	Up	0.000909842	0.00342357
lnc-CALM1-3	559	0	10	0.001	23.7026	14.5328	Up	0.000421462	0.00171859
lnc-WBSCR22-5	727	0	13	0.001	23.6928	14.5322	Up	4.19e-05	0.000223987
lnc-STK35-1	839	0	15	0.001	23.6884	14.5319	Up	8.99e-06	5.62e-05
lnc-GXYLT1-4	504	0	9	0.001	23.6602	14.5302	Up	0.000909842	0.00343161
lnc-NR3C1-1	560	0	10	0.001	23.6602	14.5302	Up	0.000421462	0.00173736
lnc-EVX1-20	728	0	13	0.001	23.6602	14.5302	Up	4.19e-05	0.000225139
lnc-C20orf173-3	616	0	11	0.001	23.6602	14.5302	Up	0.000195233	0.000871824
lnc-RPS24-4	841	0	15	0.001	23.6321	14.5285	Up	8.99e-06	5.7e-05
lnc-ZC3H12B-12	393	0	7	0.001	23.6	14.5265	Up	0.00424012	0.0131588
lnc-CELA2B-2	393	0	7	0.001	23.6	14.5265	Up	0.00424012	0.0131452
lnc-C9orf85-6	2078	0	37	0.001	23.5919	14.526	Up	3.99e-13	9.34e-12
lnc-HERPUD2-3	562	0	10	0.001	23.576	14.525	Up	0.000421462	0.00174762
lnc-RTL1-14	281	0	5	0.001	23.576	14.525	Up	0.0197602	0.0485209
lnc-TEAD4-2	562	0	10	0.001	23.576	14.525	Up	0.000421462	0.00171968
lnc-C5orf49-4	675	0	12	0.001	23.5551	14.5238	Up	9.04e-05	0.000448274
lnc-CA7-6	225	0	4	0.001	23.5551	14.5238	Up	0.0426578	0.0909429
lnc-DNAH7-3	900	0	16	0.001	23.5551	14.5238	Up	4.16e-06	2.84e-05
lnc-EPS8L3-1	450	0	8	0.001	23.5551	14.5238	Up	0.00196414	0.00661753
lnc-STK17A-1	1969	0	35	0.001	23.5521	14.5236	Up	1.86e-12	3.95e-11
lnc-PPP2R5B-1	563	0	10	0.001	23.5342	14.5225	Up	0.000421462	0.00174039
lnc-OSBPL1A-3	564	0	10	0.001	23.4924	14.5199	Up	0.000421462	0.00173481
lnc-PPIAL4B-6	565	0	10	0.001	23.4509	14.5174	Up	0.000421462	0.0017247
lnc-IGSF9B-1	1130	0	20	0.001	23.4509	14.5174	Up	1.92e-07	1.74e-06
lnc-ARAF-2	565	0	10	0.001	23.4509	14.5174	Up	0.000421462	0.00171207
lnc-AC025287.1-3	848	0	15	0.001	23.437	14.5165	Up	8.99e-06	5.61e-05
lnc-DNASE1-1	566	0	10	0.001	23.4094	14.5148	Up	0.000421462	0.00172706
lnc-MYPN-1	566	0	10	0.001	23.4094	14.5148	Up	0.000421462	0.00172031
lnc-CCDC140-13	283	0	5	0.001	23.4094	14.5148	Up	0.0197602	0.0472981
lnc-IQSEC1-3	453	0	8	0.001	23.3991	14.5142	Up	0.00196414	0.00669282
lnc-SMAD3-5	680	0	12	0.001	23.3819	14.5131	Up	9.04e-05	0.000443044
lnc-KLHL20-3	340	0	6	0.001	23.3819	14.5131	Up	0.00915346	0.0249725
lnc-KIAA1267-3	1190	0	21	0.001	23.3819	14.5131	Up	8.88e-08	8.56e-07
lnc-DUSP26-2	511	0	9	0.001	23.3361	14.5103	Up	0.000909842	0.0034005
lnc-PTRH2-1	2385	0	42	0.001	23.3329	14.5101	Up	8.51e-15	2.54e-13
lnc-SLC9A5-2	796	0	14	0.001	23.3036	14.5083	Up	1.94e-05	0.000113141
lnc-ZFAND2A-2	569	0	10	0.001	23.286	14.5072	Up	0.000421462	0.00173544
lnc-CD300A-2	911	0	16	0.001	23.2707	14.5062	Up	4.16e-06	2.82e-05
PCAT7	1310	0	23	0.001	23.2629	14.5057	Up	1.91e-08	2.09e-07
lnc-DCTD-8	285	0	5	0.001	23.2452	14.5046	Up	0.0197602	0.0490354
lnc-NPY-3	399	0	7	0.001	23.2452	14.5046	Up	0.00424012	0.0129275
lnc-C1orf124-2	1770	0	31	0.001	23.2058	14.5022	Up	4.04e-11	6.96e-10
lnc-BTAF1-1	571	0	10	0.001	23.2044	14.5021	Up	0.000421462	0.00173401
lnc-FKBP8-1	2001	0	35	0.001	23.1755	14.5003	Up	1.86e-12	3.91e-11
lnc-AC073416.2-3	286	0	5	0.001	23.1639	14.4996	Up	0.0197602	0.0475413
lnc-SPATA5-5	1087	0	19	0.001	23.1596	14.4993	Up	4.14e-07	3.49e-06
lnc-MRPL9-2	515	0	9	0.001	23.1549	14.499	Up	0.000909842	0.00343248
lnc-PRAGMIN.1-11	744	0	13	0.001	23.1514	14.4988	Up	4.19e-05	0.000224575
DEFA5	458	0	8	0.001	23.1436	14.4983	Up	0.00196414	0.00665396
lnc-AP001496.1-16	229	0	4	0.001	23.1436	14.4983	Up	0.0426578	0.0899779
KCTD6	1833	0	32	0.001	23.131	14.4975	Up	1.87e-11	3.39e-10
lnc-TMEM35-1	401	0	7	0.001	23.1292	14.4974	Up	0.00424012	0.0129557
lnc-OAZ3-13	401	0	7	0.001	23.1292	14.4974	Up	0.00424012	0.0128413
RBP2	688	0	12	0.001	23.11	14.4962	Up	9.04e-05	0.000439926
FAM26D	1491	0	26	0.001	23.1048	14.4959	Up	1.89e-09	2.49e-08
lnc-FOXB1-4	803	0	14	0.001	23.1004	14.4956	Up	1.94e-05	0.000113215
TAF7L	2355	0	41	0.001	23.0675	14.4936	Up	1.84e-14	5.26e-13
lnc-NBAS-5	517	0	9	0.001	23.0653	14.4934	Up	0.000909842	0.0033608
lnc-AL353597.1-7	632	0	11	0.001	23.0612	14.4932	Up	0.000195233	0.000866313
lnc-NXT2-2	230	0	4	0.001	23.043	14.492	Up	0.0426578	0.0897756
TSSK4	1323	0	23	0.001	23.0343	14.4915	Up	1.91e-08	2.09e-07
OR6Y1	978	0	17	0.001	23.0312	14.4913	Up	1.93e-06	1.41e-05
lnc-CD44-2	518	0	9	0.001	23.0208	14.4906	Up	0.000909842	0.00341984
lnc-SNRPB2-1	3109	0	54	0.001	23.0134	14.4902	Up	8.31e-19	4.29e-17
lnc-CDH1-5	576	0	10	0.001	23.003	14.4895	Up	0.000421462	0.0017236
lnc-UBAC2-4	922	0	16	0.001	22.993	14.4889	Up	4.16e-06	2.85e-05
lnc-CTAGE1-2	634	0	11	0.001	22.9885	14.4886	Up	0.000195233	0.000874606
lnc-CENPC1-4	1441	0	25	0.001	22.9871	14.4885	Up	4.09e-09	5.1e-08
lnc-PNN-1	346	0	6	0.001	22.9764	14.4879	Up	0.00915346	0.0250287
lnc-QPCT-2	346	0	6	0.001	22.9764	14.4879	Up	0.00915346	0.0248098
lnc-TTLL4-2	693	0	12	0.001	22.9433	14.4858	Up	9.04e-05	0.000446059
lnc-GNAI1-4	462	0	8	0.001	22.9433	14.4858	Up	0.00196414	0.00668572
lnc-BIN1-8	462	0	8	0.001	22.9433	14.4858	Up	0.00196414	0.00665145
QPCTL	2311	0	40	0.001	22.9333	14.4852	Up	3.97e-14	1.07e-12
lnc-CHD9-8	867	0	15	0.001	22.9234	14.4845	Up	8.99e-06	5.67e-05
lnc-NEUROD6-5	289	0	5	0.001	22.9234	14.4845	Up	0.0197602	0.0483781
lnc-TMEM64-1	578	0	10	0.001	22.9234	14.4845	Up	0.000421462	0.0017329
lnc-RWDD2B-2	636	0	11	0.001	22.9162	14.4841	Up	0.000195233	0.000879693
FBXL12	1852	0	32	0.001	22.8937	14.4827	Up	1.87e-11	3.39e-10
lnc-ST7L-6	579	0	10	0.001	22.8838	14.482	Up	0.000421462	0.00172109
RHNO1	2085	0	36	0.001	22.8772	14.4816	Up	8.62e-13	1.91e-11
lnc-METTL21A-2	348	0	6	0.001	22.8444	14.4796	Up	0.00915346	0.0256436
lnc-RP11-1C1.5.1-5	348	0	6	0.001	22.8444	14.4796	Up	0.00915346	0.0252299
lnc-LYSMD4-3	232	0	4	0.001	22.8444	14.4796	Up	0.0426578	0.0915379
lnc-C3orf37-5	754	0	13	0.001	22.8444	14.4796	Up	4.19e-05	0.00022412
lnc-MTHFS-2	232	0	4	0.001	22.8444	14.4796	Up	0.0426578	0.0903512
lnc-EFHA2-3	871	0	15	0.001	22.8181	14.4779	Up	8.99e-06	5.66e-05
lnc-PTGR1-1	581	0	10	0.001	22.8051	14.4771	Up	0.000421462	0.0017175
lnc-FGF8-2	1104	0	19	0.001	22.803	14.4769	Up	4.14e-07	3.49e-06
lnc-ACAD10-2	756	0	13	0.001	22.7839	14.4757	Up	4.19e-05	0.000224093
lnc-TBC1D20-1	1047	0	18	0.001	22.7789	14.4754	Up	8.94e-07	7.06e-06
lnc-LONP2-9	291	0	5	0.001	22.7659	14.4746	Up	0.0197602	0.0479108
lnc-FERMT1-3	932	0	16	0.001	22.7463	14.4733	Up	4.16e-06	2.87e-05
SDC4P	467	0	8	0.001	22.6976	14.4703	Up	0.00196414	0.00672546
lnc-THBS2-4	934	0	16	0.001	22.6976	14.4703	Up	4.16e-06	2.83e-05
lnc-GGNBP1-5	292	0	5	0.001	22.6879	14.4696	Up	0.0197602	0.0491005
lnc-CCNL2-2	292	0	5	0.001	22.6879	14.4696	Up	0.0197602	0.0488466
TMEM239	701	0	12	0.001	22.6814	14.4692	Up	9.04e-05	0.000440307
lnc-CBFA2T3-2	2105	0	36	0.001	22.6599	14.4679	Up	8.62e-13	1.9e-11
lnc-TACC3-2	1346	0	23	0.001	22.6407	14.4666	Up	1.91e-08	2.11e-07
lnc-TMEM18-4	410	0	7	0.001	22.6215	14.4654	Up	0.00424012	0.0129671
TAS2R16	996	0	17	0.001	22.615	14.465	Up	1.93e-06	1.41e-05
lnc-AC110080.1-6	293	0	5	0.001	22.6105	14.4647	Up	0.0197602	0.0484785
lnc-C17orf103-3	293	0	5	0.001	22.6105	14.4647	Up	0.0197602	0.0483807
lnc-PJA2-3	528	0	9	0.001	22.5848	14.4631	Up	0.000909842	0.00339513
OR6C76	939	0	16	0.001	22.5768	14.4626	Up	4.16e-06	2.86e-05
lnc-HIATL1-16	1937	0	33	0.001	22.5731	14.4623	Up	8.67e-12	1.66e-10
lnc-KRTAP5-6-1	587	0	10	0.001	22.572	14.4622	Up	0.000421462	0.00172753
lnc-C9orf66-5	411	0	7	0.001	22.5665	14.4619	Up	0.00424012	0.0129161
lnc-AC011239.1.1-1	764	0	13	0.001	22.5454	14.4605	Up	4.19e-05	0.000222215
LOC102723604	529	0	9	0.001	22.5421	14.4603	Up	0.000909842	0.00335914
lnc-PTPRU-6	529	0	9	0.001	22.5421	14.4603	Up	0.000909842	0.00335445
lnc-CDH3-1	529	0	9	0.001	22.5421	14.4603	Up	0.000909842	0.00334622
lnc-IKBKB-3	294	0	5	0.001	22.5336	14.4598	Up	0.0197602	0.0482047
DOLPP1	2176	0	37	0.001	22.5294	14.4595	Up	3.99e-13	9.3e-12
C10orf67	2943	0	50	0.001	22.5106	14.4583	Up	1.81e-17	7.92e-16
lnc-CCDC30-1	1001	0	17	0.001	22.502	14.4578	Up	1.93e-06	1.41e-05
lnc-PABPC1-1	354	0	6	0.001	22.4572	14.4549	Up	0.00915346	0.0255037
lnc-ACP6-1	885	0	15	0.001	22.4572	14.4549	Up	8.99e-06	5.64e-05
lnc-PFKP-34	590	0	10	0.001	22.4572	14.4549	Up	0.000421462	0.00172
lnc-CTA-299D3.8.1-6	2421	0	41	0.001	22.4386	14.4537	Up	1.84e-14	5.25e-13
lnc-PSMG4-17	1064	0	18	0.001	22.415	14.4522	Up	8.94e-07	7.14e-06
ZC3H12D	4907	0	83	0.001	22.4114	14.4519	Up	1.69e-28	2.38e-26
lnc-RELL1-3	710	0	12	0.001	22.3939	14.4508	Up	9.04e-05	0.0004444
lnc-C9orf66-8	296	0	5	0.001	22.3813	14.45	Up	0.0197602	0.0487152
lnc-AC010872.2.1-10	296	0	5	0.001	22.3813	14.45	Up	0.0197602	0.0485288
lnc-DDX1-1	533	0	9	0.001	22.3729	14.4495	Up	0.000909842	0.00336938
lnc-RAD9A-2	237	0	4	0.001	22.3624	14.4488	Up	0.0426578	0.0916649
LINC00998	1127	0	19	0.001	22.3376	14.4472	Up	4.14e-07	3.53e-06
lnc-ID1-1	356	0	6	0.001	22.331	14.4468	Up	0.00915346	0.0251681
lnc-ZCCHC24-2	2018	0	34	0.001	22.3236	14.4463	Up	4.02e-12	8.07e-11
HOXC10	1959	0	33	0.001	22.3196	14.446	Up	8.67e-12	1.66e-10
lnc-RP11-1C1.5.1-8	297	0	5	0.001	22.306	14.4451	Up	0.0197602	0.0478359
lnc-RP11-408E5.4.1-9	416	0	7	0.001	22.2952	14.4444	Up	0.00424012	0.0128925
lnc-EIF4E3-3	535	0	9	0.001	22.2893	14.4441	Up	0.000909842	0.00342758
TRIM69	1903	0	32	0.001	22.2802	14.4435	Up	1.87e-11	3.39e-10
lnc-FSTL1-1	357	0	6	0.001	22.2685	14.4427	Up	0.00915346	0.024971
lnc-PTP4A3-6	238	0	4	0.001	22.2685	14.4427	Up	0.0426578	0.0894071
lnc-DYRK2-3	2679	0	45	0.001	22.256	14.4419	Up	8.46e-16	2.89e-14
lnc-RELL1-2	655	0	11	0.001	22.2515	14.4416	Up	0.000195233	0.000881904
lnc-FNDC1-6	834	0	14	0.001	22.2418	14.441	Up	1.94e-05	0.000112586
lnc-OR2B3-1	596	0	10	0.001	22.2311	14.4403	Up	0.000421462	0.00174456
lnc-C7orf33-6	298	0	5	0.001	22.2311	14.4403	Up	0.0197602	0.048505
lnc-BID-5	716	0	12	0.001	22.2063	14.4387	Up	9.04e-05	0.000444255
lnc-CDH9-9	358	0	6	0.001	22.2063	14.4387	Up	0.00915346	0.0248442
LMOD2	2149	0	36	0.001	22.1959	14.438	Up	8.62e-13	1.91e-11
lnc-NDE1-1	836	0	14	0.001	22.1886	14.4375	Up	1.94e-05	0.000112137
KRTAP4-12	1075	0	18	0.001	22.1856	14.4373	Up	8.94e-07	7.08e-06
lnc-CASK-2	478	0	8	0.001	22.1753	14.4367	Up	0.00196414	0.00677659
lnc-GAA-1	478	0	8	0.001	22.1753	14.4367	Up	0.00196414	0.00670808
lnc-GLI2-7	598	0	10	0.001	22.1567	14.4355	Up	0.000421462	0.00173211
lnc-CGB5-3	598	0	10	0.001	22.1567	14.4355	Up	0.000421462	0.00171922
lnc-KLHL20-4	1256	0	21	0.001	22.1532	14.4352	Up	8.88e-08	8.61e-07
lnc-PARVA-1	419	0	7	0.001	22.1356	14.4341	Up	0.00424012	0.0131144
lnc-SLC43A3-1	1796	0	30	0.001	22.1321	14.4339	Up	8.72e-11	1.43e-09
lnc-CLEC16A-5	479	0	8	0.001	22.129	14.4337	Up	0.00196414	0.00673265
lnc-CHMP2B-3	539	0	9	0.001	22.1239	14.4333	Up	0.000909842	0.00340248
lnc-GPR144-2	539	0	9	0.001	22.1239	14.4333	Up	0.000909842	0.00339006
lnc-DGCR2-5	1859	0	31	0.001	22.0948	14.4314	Up	4.04e-11	6.96e-10
lnc-DOPEY1-1	480	0	8	0.001	22.0829	14.4306	Up	0.00196414	0.00673008
lnc-KIDINS220-6	2342	0	39	0.001	22.064	14.4294	Up	8.57e-14	2.21e-12
lnc-SLC25A15-12	601	0	10	0.001	22.0462	14.4282	Up	0.000421462	0.00173338
lnc-DHCR7-2	421	0	7	0.001	22.0304	14.4272	Up	0.00424012	0.0131407
lnc-AP2B1-1	361	0	6	0.001	22.0217	14.4266	Up	0.00915346	0.0255242
lnc-DRG1-1	662	0	11	0.001	22.0162	14.4263	Up	0.000195233	0.000883503
lnc-RBMS3-3	1204	0	20	0.001	22.0095	14.4258	Up	1.92e-07	1.76e-06
lnc-RP13-395E19.1.1-1	301	0	5	0.001	22.0095	14.4258	Up	0.0197602	0.0481629
lnc-METTL10-1	241	0	4	0.001	21.9913	14.4246	Up	0.0426578	0.0930896
lnc-AL901608.1-31	241	0	4	0.001	21.9913	14.4246	Up	0.0426578	0.0925904
lnc-GRB10-1	482	0	8	0.001	21.9913	14.4246	Up	0.00196414	0.00672188
lnc-UBAP1-4	241	0	4	0.001	21.9913	14.4246	Up	0.0426578	0.0909731
lnc-GNB1L-1	844	0	14	0.001	21.9782	14.4238	Up	1.94e-05	0.000112238
lnc-POLRMT-3	1327	0	22	0.001	21.9664	14.423	Up	4.11e-08	4.24e-07
lnc-NUBP1-2	543	0	9	0.001	21.9609	14.4226	Up	0.000909842	0.00338529
lnc-ATXN7L3B-1	543	0	9	0.001	21.9609	14.4226	Up	0.000909842	0.00338025
lnc-EXD2-5	362	0	6	0.001	21.9609	14.4226	Up	0.00915346	0.0248547
lnc-GGTLC2-4	302	0	5	0.001	21.9366	14.4211	Up	0.0197602	0.0473385
lnc-SBDS-22	423	0	7	0.001	21.9263	14.4204	Up	0.00424012	0.0131027
lnc-CFTR-1	423	0	7	0.001	21.9263	14.4204	Up	0.00424012	0.0129425
ETNK2	2720	0	45	0.001	21.9205	14.42	Up	8.46e-16	2.91e-14
lnc-PXDN-7	786	0	13	0.001	21.9143	14.4196	Up	4.19e-05	0.000222714
lnc-FGL2-1	484	0	8	0.001	21.9004	14.4187	Up	0.00196414	0.006727
lnc-DAP-10	242	0	4	0.001	21.9004	14.4187	Up	0.0426578	0.0912112
NMB	1030	0	17	0.001	21.8685	14.4166	Up	1.93e-06	1.42e-05
lnc-GREM2-1	303	0	5	0.001	21.8643	14.4163	Up	0.0197602	0.0473764
lnc-LPHN3-1	546	0	9	0.001	21.8402	14.4147	Up	0.000909842	0.00339711
lnc-PDCD2L-4	425	0	7	0.001	21.8231	14.4136	Up	0.00424012	0.0127998
lnc-MBL2-1	243	0	4	0.001	21.8103	14.4127	Up	0.0426578	0.0924921
lnc-SYNPO-5	486	0	8	0.001	21.8103	14.4127	Up	0.00196414	0.00667661
lnc-FAM18A-6	2128	0	35	0.001	21.7923	14.4115	Up	1.86e-12	3.93e-11
lnc-PFKP-19	608	0	10	0.001	21.7923	14.4115	Up	0.000421462	0.00171594
lnc-C9orf117-2	365	0	6	0.001	21.7804	14.4107	Up	0.00915346	0.0246891
lnc-AHSA2-2	791	0	13	0.001	21.7758	14.4104	Up	4.19e-05	0.000226004
lnc-FAM157A-2	852	0	14	0.001	21.7719	14.4102	Up	1.94e-05	0.000113643
lnc-TPST1-2	426	0	7	0.001	21.7719	14.4102	Up	0.00424012	0.0128283
lnc-ZNF383-2	487	0	8	0.001	21.7655	14.4098	Up	0.00196414	0.00665195
lnc-DNAJC15-5	1035	0	17	0.001	21.7629	14.4096	Up	1.93e-06	1.4e-05
lnc-SLC5A9-10	609	0	10	0.001	21.7565	14.4092	Up	0.000421462	0.00172816
TSPAN4	1462	0	24	0.001	21.7506	14.4088	Up	8.83e-09	1.02e-07
lnc-RNFT2-2	366	0	6	0.001	21.7209	14.4068	Up	0.00915346	0.0256308
lnc-SEPT9-4	366	0	6	0.001	21.7209	14.4068	Up	0.00915346	0.0251343
lnc-DMGDH-3	244	0	4	0.001	21.7209	14.4068	Up	0.0426578	0.0911288
lnc-MB-1	244	0	4	0.001	21.7209	14.4068	Up	0.0426578	0.0908911
lnc-KAT6A-1	1770	0	29	0.001	21.7086	14.406	Up	1.88e-10	2.92e-09
lnc-TSN-10	794	0	13	0.001	21.6935	14.405	Up	4.19e-05	0.000224147
lnc-DENND4A-2	733	0	12	0.001	21.6912	14.4048	Up	9.04e-05	0.000448175
CEP95	2689	0	44	0.001	21.6805	14.4041	Up	1.83e-15	5.99e-14
lnc-RP11-247C2.2.1-5	795	0	13	0.001	21.6662	14.4032	Up	4.19e-05	0.000226493
lnc-SLC35B4-6	367	0	6	0.001	21.6617	14.4029	Up	0.00915346	0.0247188
lnc-TMCO7-2	245	0	4	0.001	21.6322	14.4009	Up	0.0426578	0.0930716
lnc-NT5E-7	368	0	6	0.001	21.6028	14.3989	Up	0.00915346	0.0252981
lnc-RP3-377D14.1.1-10	675	0	11	0.001	21.5922	14.3982	Up	0.000195233	0.00087802
lnc-NIPBL-2	307	0	5	0.001	21.5794	14.3974	Up	0.0197602	0.0482309
lnc-PTCH1-3	2825	0	46	0.001	21.5748	14.3971	Up	3.92e-16	1.42e-14
lnc-GRHPR-7	799	0	13	0.001	21.5578	14.3959	Up	4.19e-05	0.000225354
lnc-SVIL-2	369	0	6	0.001	21.5443	14.395	Up	0.00915346	0.0252097
lnc-PTK2-4	1415	0	23	0.001	21.5367	14.3945	Up	1.91e-08	2.09e-07
TRAF2	2277	0	37	0.001	21.5301	14.3941	Up	3.99e-13	9.27e-12
lnc-CDH12-3	677	0	11	0.001	21.5284	14.394	Up	0.000195233	0.000868715
lnc-AC087491.2.1-1	616	0	10	0.001	21.5093	14.3927	Up	0.000421462	0.00171299
lnc-TCF7L2-1	1418	0	23	0.001	21.4911	14.3915	Up	1.91e-08	2.1e-07
lnc-TK2-2	555	0	9	0.001	21.4861	14.3911	Up	0.000909842	0.00342615
lnc-TPO-7	555	0	9	0.001	21.4861	14.3911	Up	0.000909842	0.00340078
lnc-ERAP2-7	617	0	10	0.001	21.4745	14.3903	Up	0.000421462	0.00174601
CCRL2	1729	0	28	0.001	21.4571	14.3892	Up	4.06e-10	5.99e-09
lnc-FOXO4-4	927	0	15	0.001	21.4397	14.388	Up	8.99e-06	5.64e-05
lnc-CMTM4-4	309	0	5	0.001	21.4397	14.388	Up	0.0197602	0.0478307
lnc-TOR1AIP2-5	989	0	16	0.001	21.4354	14.3877	Up	4.16e-06	2.85e-05
lnc-IL2RA-1	371	0	6	0.001	21.4281	14.3872	Up	0.00915346	0.0255021
lnc-IL10-1	433	0	7	0.001	21.4199	14.3867	Up	0.00424012	0.0130784
lnc-UEVLD-4	433	0	7	0.001	21.4199	14.3867	Up	0.00424012	0.012799
lnc-AC019294.2-2	495	0	8	0.001	21.4137	14.3862	Up	0.00196414	0.0066096
HLA-DPB2	805	0	13	0.001	21.3971	14.3851	Up	4.19e-05	0.000225273
lnc-FAM133B-5	558	0	9	0.001	21.3705	14.3833	Up	0.000909842	0.00341384
lnc-MAP4K4-1	558	0	9	0.001	21.3705	14.3833	Up	0.000909842	0.00340163
lnc-ZNF732-1	310	0	5	0.001	21.3705	14.3833	Up	0.0197602	0.0485315
lnc-DAPK2-1	496	0	8	0.001	21.3705	14.3833	Up	0.00196414	0.00668268
OR2AP1	930	0	15	0.001	21.3705	14.3833	Up	8.99e-06	5.64e-05
lnc-THRSP-4	372	0	6	0.001	21.3705	14.3833	Up	0.00915346	0.0248878
lnc-ZRANB1-4	4780	0	77	0.001	21.3437	14.3815	Up	1.71e-26	1.98e-24
lnc-EME2-2	2235	0	36	0.001	21.3419	14.3814	Up	8.62e-13	1.9e-11
lnc-ANK2-4	435	0	7	0.001	21.3214	14.38	Up	0.00424012	0.0130775
lnc-TRAPPC12-2	435	0	7	0.001	21.3214	14.38	Up	0.00424012	0.0128603
lnc-ATP6V1C2-3	373	0	6	0.001	21.3132	14.3795	Up	0.00915346	0.0249603
lnc-ZNF143-3	311	0	5	0.001	21.3018	14.3787	Up	0.0197602	0.0478952
lnc-ADRA1D-2	871	0	14	0.001	21.2969	14.3784	Up	1.94e-05	0.000112152
lnc-ITGB7-5	560	0	9	0.001	21.2942	14.3782	Up	0.000909842	0.00335693
OR51M1	1058	0	17	0.001	21.2897	14.3779	Up	1.93e-06	1.42e-05
lnc-MARCH10-1	498	0	8	0.001	21.2847	14.3775	Up	0.00196414	0.0066751
lnc-PLA2G2F-1	2493	0	40	0.001	21.2591	14.3758	Up	3.97e-14	1.07e-12
lnc-EHD3-2	561	0	9	0.001	21.2563	14.3756	Up	0.000909842	0.00340957
lnc-TMEM173-2	812	0	13	0.001	21.2126	14.3726	Up	4.19e-05	0.000222372
lnc-DMRTA1-7	1187	0	19	0.001	21.2085	14.3724	Up	4.14e-07	3.53e-06
lnc-DLL1-6	500	0	8	0.001	21.1996	14.3717	Up	0.00196414	0.00664694
lnc-DCAF12-1	2628	0	42	0.001	21.1754	14.3701	Up	8.51e-15	2.54e-13
lnc-CCDC82-9	438	0	7	0.001	21.1754	14.3701	Up	0.00424012	0.0127724
lnc-TKTL2-2	314	0	5	0.001	21.0983	14.3648	Up	0.0197602	0.0478204
lnc-TBL1XR1-17	440	0	7	0.001	21.0791	14.3635	Up	0.00424012	0.0130569
lnc-FAM100B-2	3835	0	61	0.001	21.0752	14.3633	Up	3.8e-21	2.56e-19
lnc-WISP1-3	566	0	9	0.001	21.0685	14.3628	Up	0.000909842	0.00336689
MPV17	1007	0	16	0.001	21.0522	14.3617	Up	4.16e-06	2.85e-05
NOTO	1448	0	23	0.001	21.0459	14.3612	Up	1.91e-08	2.09e-07
WDR33	6299	0	100	0.001	21.0347	14.3605	Up	3.52e-34	7.94e-32
lnc-ETAA1-7	567	0	9	0.001	21.0313	14.3603	Up	0.000909842	0.00340021
OR5I1	945	0	15	0.001	21.0313	14.3603	Up	8.99e-06	5.67e-05
lnc-KDM4C-14	756	0	12	0.001	21.0313	14.3603	Up	9.04e-05	0.000442899
lnc-C4orf34-12	315	0	5	0.001	21.0313	14.3603	Up	0.0197602	0.0472302
lnc-CCDC8-1	2711	0	43	0.001	21.0158	14.3592	Up	3.94e-15	1.23e-13
lnc-ATXN3-3	568	0	9	0.001	20.9943	14.3577	Up	0.000909842	0.00335143
lnc-PDZK1IP1-1	947	0	15	0.001	20.9869	14.3572	Up	8.99e-06	5.63e-05
lnc-WNT2B-1	316	0	5	0.001	20.9648	14.3557	Up	0.0197602	0.0482021
lnc-C17orf102-1	316	0	5	0.001	20.9648	14.3557	Up	0.0197602	0.0475617
lnc-PRDX6-4	316	0	5	0.001	20.9648	14.3557	Up	0.0197602	0.0474701
lnc-CCDC7-6	1075	0	17	0.001	20.9531	14.3549	Up	1.93e-06	1.41e-05
lnc-LOH12CR1-3	2214	0	35	0.001	20.9458	14.3544	Up	1.86e-12	3.92e-11
lnc-BOLL-5	887	0	14	0.001	20.9128	14.3521	Up	1.94e-05	0.000112951
lnc-C10orf108-3	507	0	8	0.001	20.9069	14.3517	Up	0.00196414	0.00665546
lnc-WNT10A-3	634	0	10	0.001	20.8986	14.3511	Up	0.000421462	0.00173084
lnc-CDH20-3	1839	0	29	0.001	20.8941	14.3508	Up	1.88e-10	2.94e-09
lnc-GATSL1-7	825	0	13	0.001	20.8784	14.3497	Up	4.19e-05	0.000225327
lnc-ERI1-1	952	0	15	0.001	20.8767	14.3496	Up	8.99e-06	5.7e-05
lnc-RNF182-4	254	0	4	0.001	20.8657	14.3488	Up	0.0426578	0.0900964
lnc-WDR45L-2	318	0	5	0.001	20.8329	14.3466	Up	0.0197602	0.0491141
lnc-CACNA1E-2	1145	0	18	0.001	20.8293	14.3463	Up	8.94e-07	7.13e-06
lnc-BTN3A2-2	700	0	11	0.001	20.821	14.3458	Up	0.000195233	0.000880665
lnc-ARHGEF16-2	382	0	6	0.001	20.8111	14.3451	Up	0.00915346	0.0255068
lnc-FAM75A6-10	382	0	6	0.001	20.8111	14.3451	Up	0.00915346	0.0250318
lnc-SUCLA2-7	446	0	7	0.001	20.7956	14.344	Up	0.00424012	0.0130043
lnc-LY75-1	1402	0	22	0.001	20.7913	14.3437	Up	4.11e-08	4.23e-07
lnc-CHAF1B-3	893	0	14	0.001	20.7723	14.3424	Up	1.94e-05	0.000113009
lnc-ERI2-1	383	0	6	0.001	20.7568	14.3413	Up	0.00915346	0.0256021
lnc-AC008993.1-1	383	0	6	0.001	20.7568	14.3413	Up	0.00915346	0.0249225
lnc-PRAM1-3	511	0	8	0.001	20.7432	14.3404	Up	0.00196414	0.00660268
MLPH	3961	0	62	0.001	20.7393	14.3401	Up	1.76e-21	1.23e-19
lnc-COX4I2-1	2557	0	40	0.001	20.727	14.3392	Up	3.97e-14	1.07e-12
lnc-MYOF-3	512	0	8	0.001	20.7027	14.3375	Up	0.00196414	0.00677867
lnc-C22orf32-4	512	0	8	0.001	20.7027	14.3375	Up	0.00196414	0.00677607
lnc-GREM2-7	448	0	7	0.001	20.7027	14.3375	Up	0.00424012	0.0130399
lnc-SUMF2-5	1344	0	21	0.001	20.7027	14.3375	Up	8.88e-08	8.56e-07
lnc-NDUFV2-2	704	0	11	0.001	20.7027	14.3375	Up	0.000195233	0.000867341
lnc-TPH2-3	2050	0	32	0.001	20.6825	14.3361	Up	1.87e-11	3.36e-10
lnc-PSEN2-1	449	0	7	0.001	20.6566	14.3343	Up	0.00424012	0.0128586
lnc-VKORC1L1-3	385	0	6	0.001	20.6489	14.3338	Up	0.00915346	0.025047
lnc-C6orf99-7	1284	0	20	0.001	20.6382	14.333	Up	1.92e-07	1.74e-06
lnc-FOXQ1-3	642	0	10	0.001	20.6382	14.333	Up	0.000421462	0.00173132
lnc-METTL22-2	1028	0	16	0.001	20.6222	14.3319	Up	4.16e-06	2.87e-05
lnc-TREM1-3	514	0	8	0.001	20.6222	14.3319	Up	0.00196414	0.00667156
lnc-THBS2-5	1735	0	27	0.001	20.6192	14.3317	Up	8.78e-10	1.22e-08
lnc-DCP1B-7	964	0	15	0.001	20.6168	14.3315	Up	8.99e-06	5.68e-05
AASDH	3603	0	56	0.001	20.5935	14.3299	Up	1.78e-19	1e-17
lnc-FAIM3-1	1030	0	16	0.001	20.5821	14.3291	Up	4.16e-06	2.83e-05
lnc-CECR1-3	837	0	13	0.001	20.579	14.3289	Up	4.19e-05	0.000226357
lnc-PKN2-3	322	0	5	0.001	20.5741	14.3285	Up	0.0197602	0.0486139
lnc-CBX5-2	451	0	7	0.001	20.565	14.3279	Up	0.00424012	0.0131307
lnc-TPM4-4	580	0	9	0.001	20.5599	14.3275	Up	0.000909842	0.00339316
lnc-NPVF-5	1870	0	29	0.001	20.5477	14.3267	Up	1.88e-10	2.92e-09
lnc-SFSWAP-8	645	0	10	0.001	20.5422	14.3263	Up	0.000421462	0.00175198
lnc-MBNL3-1	387	0	6	0.001	20.5422	14.3263	Up	0.00915346	0.0255147
lnc-COL6A3-8	258	0	4	0.001	20.5422	14.3263	Up	0.0426578	0.0920302
lnc-SOBP-2	258	0	4	0.001	20.5422	14.3263	Up	0.0426578	0.0906589
lnc-GPR82-2	387	0	6	0.001	20.5422	14.3263	Up	0.00915346	0.0246921
lnc-PLA2G4A-1	1097	0	17	0.001	20.5329	14.3256	Up	1.93e-06	1.42e-05
lnc-SLC16A13-1	968	0	15	0.001	20.5316	14.3256	Up	8.99e-06	5.65e-05
lnc-STK24-1	323	0	5	0.001	20.5104	14.3241	Up	0.0197602	0.0483491
SRSF9	1163	0	18	0.001	20.5069	14.3238	Up	8.94e-07	7.09e-06
lnc-FAM161A-2	388	0	6	0.001	20.4893	14.3226	Up	0.00915346	0.0250226
lnc-SLC38A8-4	906	0	14	0.001	20.4742	14.3215	Up	1.94e-05	0.0001132
lnc-IL22RA2-1	1359	0	21	0.001	20.4742	14.3215	Up	8.88e-08	8.58e-07
lnc-PARN-11	518	0	8	0.001	20.4629	14.3207	Up	0.00196414	0.00662051
lnc-CTAGE1-3	259	0	4	0.001	20.4629	14.3207	Up	0.0426578	0.0894697
lnc-IBTK-8	518	0	8	0.001	20.4629	14.3207	Up	0.00196414	0.00659183
lnc-HERC1-3	324	0	5	0.001	20.4471	14.3196	Up	0.0197602	0.0490246
lnc-PANK3-8	648	0	10	0.001	20.4471	14.3196	Up	0.000421462	0.00170867
lnc-GALNT6-2	519	0	8	0.001	20.4235	14.3179	Up	0.00196414	0.00660762
lnc-GPRC5A-3	1363	0	21	0.001	20.4141	14.3173	Up	8.88e-08	8.6e-07
lnc-SMAD7-1	1364	0	21	0.001	20.3992	14.3162	Up	8.88e-08	8.62e-07
lnc-E2F7-4	390	0	6	0.001	20.3842	14.3152	Up	0.00915346	0.0255639
lnc-MLL5-5	260	0	4	0.001	20.3842	14.3152	Up	0.0426578	0.0927204
lnc-RREB1-2	390	0	6	0.001	20.3842	14.3152	Up	0.00915346	0.0253872
lnc-RPS24-11	520	0	8	0.001	20.3842	14.3152	Up	0.00196414	0.00670095
lnc-ZNF202-1	585	0	9	0.001	20.3842	14.3152	Up	0.000909842	0.00334841
lnc-TMEM72-3	521	0	8	0.001	20.3451	14.3124	Up	0.00196414	0.00670706
lnc-POLG-1	391	0	6	0.001	20.3321	14.3115	Up	0.00915346	0.0252005
lnc-AC003101.1.1-1	717	0	11	0.001	20.3274	14.3111	Up	0.000195233	0.000873996
lnc-LLPH-6	587	0	9	0.001	20.3148	14.3102	Up	0.000909842	0.00336273
lnc-CYS1-7	783	0	12	0.001	20.3061	14.3096	Up	9.04e-05	0.000443963
lnc-NFKBIZ-2	522	0	8	0.001	20.3061	14.3096	Up	0.00196414	0.00666602
lnc-COA5-2	588	0	9	0.001	20.2802	14.3078	Up	0.000909842	0.00343219
lnc-SHANK2-1	392	0	6	0.001	20.2802	14.3078	Up	0.00915346	0.0252624
lnc-SV2C-4	327	0	5	0.001	20.2595	14.3063	Up	0.0197602	0.0482965
lnc-AC005863.1.1-2	458	0	7	0.001	20.2507	14.3057	Up	0.00424012	0.013065
lnc-MLKL-3	458	0	7	0.001	20.2507	14.3057	Up	0.00424012	0.0128655
lnc-NR1D1-3	655	0	10	0.001	20.2286	14.3041	Up	0.000421462	0.00171439
lnc-FAM72B-3	459	0	7	0.001	20.2066	14.3025	Up	0.00424012	0.0127835
lnc-RORB-4	328	0	5	0.001	20.1978	14.3019	Up	0.0197602	0.0481446
lnc-FTH1-2	788	0	12	0.001	20.1773	14.3004	Up	9.04e-05	0.000443237
lnc-PLA2G4A-7	394	0	6	0.001	20.1773	14.3004	Up	0.00915346	0.0248517
PRKAG1	1839	0	28	0.001	20.1736	14.3002	Up	4.06e-10	5.98e-09
lnc-COMT-4	263	0	4	0.001	20.1517	14.2986	Up	0.0426578	0.0933254
lnc-RTN4IP1-1	592	0	9	0.001	20.1432	14.298	Up	0.000909842	0.00340872
TMEM138	1842	0	28	0.001	20.1408	14.2978	Up	4.06e-10	5.94e-09
lnc-EHD1-1	461	0	7	0.001	20.1189	14.2963	Up	0.00424012	0.0128882
lnc-C14orf101-6	2635	0	40	0.001	20.1135	14.2959	Up	3.97e-14	1.07e-12
lnc-TRAPPC10-3	791	0	12	0.001	20.1007	14.295	Up	9.04e-05	0.000446451
lnc-GPR137B-1	528	0	8	0.001	20.0754	14.2931	Up	0.00196414	0.00675171
lnc-FAM212A-1	330	0	5	0.001	20.0754	14.2931	Up	0.0197602	0.0485713
lnc-RAD50-1	264	0	4	0.001	20.0754	14.2931	Up	0.0426578	0.0914593
lnc-C2orf27A-4	462	0	7	0.001	20.0754	14.2931	Up	0.00424012	0.0129892
lnc-C10orf55-1	462	0	7	0.001	20.0754	14.2931	Up	0.00424012	0.0129346
lnc-NLRP10-2	1980	0	30	0.001	20.0754	14.2931	Up	8.72e-11	1.42e-09
FAM9C	1255	0	19	0.001	20.0594	14.292	Up	4.14e-07	3.51e-06
lnc-VPS45-2	991	0	15	0.001	20.0551	14.2917	Up	8.99e-06	5.61e-05
lnc-HEATR5A-1	727	0	11	0.001	20.0477	14.2912	Up	0.000195233	0.000886181
lnc-FOXJ3-1	661	0	10	0.001	20.045	14.291	Up	0.000421462	0.00171408
lnc-RPL27-2	595	0	9	0.001	20.0416	14.2907	Up	0.000909842	0.00336495
lnc-AL901608.1-25	265	0	4	0.001	19.9996	14.2877	Up	0.0426578	0.0929136
lnc-TFPI-1	729	0	11	0.001	19.9927	14.2872	Up	0.000195233	0.0008658
lnc-MRPS15-2	928	0	14	0.001	19.9888	14.2869	Up	1.94e-05	0.00011397
lnc-FZD9-1	464	0	7	0.001	19.9888	14.2869	Up	0.00424012	0.0128421
lnc-XPO7-2	2056	0	31	0.001	19.9777	14.2861	Up	4.04e-11	6.96e-10
lnc-UBE2K-5	597	0	9	0.001	19.9745	14.2859	Up	0.000909842	0.00336412
lnc-MUL1-2	332	0	5	0.001	19.9544	14.2844	Up	0.0197602	0.0490815
lnc-TUSC3-5	465	0	7	0.001	19.9458	14.2838	Up	0.00424012	0.0131579
lnc-C9orf103-3	1395	0	21	0.001	19.9458	14.2838	Up	8.88e-08	8.61e-07
OR4B1	930	0	14	0.001	19.9458	14.2838	Up	1.94e-05	0.000112008
lnc-ACP1-5	598	0	9	0.001	19.9411	14.2835	Up	0.000909842	0.00342271
lnc-AGTRAP-2	266	0	4	0.001	19.9244	14.2822	Up	0.0426578	0.0920391
lnc-LRRTM4-5	266	0	4	0.001	19.9244	14.2822	Up	0.0426578	0.0896412
lnc-ARHGAP11A-1	732	0	11	0.001	19.9108	14.2813	Up	0.000195233	0.000877317
lnc-GNB2L1-3	599	0	9	0.001	19.9078	14.281	Up	0.000909842	0.00342185
lnc-KLHL20-5	333	0	5	0.001	19.8945	14.2801	Up	0.0197602	0.0480378
lnc-CCNI-6	866	0	13	0.001	19.8899	14.2797	Up	4.19e-05	0.000226985
lnc-LAMA1-3	533	0	8	0.001	19.887	14.2795	Up	0.00196414	0.00672854
TMIGD2	1266	0	19	0.001	19.8851	14.2794	Up	4.14e-07	3.54e-06
lnc-SPP2-2	1201	0	18	0.001	19.8581	14.2774	Up	8.94e-07	7.1e-06
lnc-ENAH-1	534	0	8	0.001	19.8498	14.2768	Up	0.00196414	0.00664194
lnc-RHBDD3-2	534	0	8	0.001	19.8498	14.2768	Up	0.00196414	0.00662747
lnc-C6orf223-4	1068	0	16	0.001	19.8498	14.2768	Up	4.16e-06	2.82e-05
lnc-KDM4B-1	802	0	12	0.001	19.825	14.275	Up	9.04e-05	0.000446697
lnc-HNRNPH1-3	535	0	8	0.001	19.8127	14.2741	Up	0.00196414	0.00674088
lnc-GREB1-2	870	0	13	0.001	19.7985	14.2731	Up	4.19e-05	0.000224494
lnc-C14orf109-3	870	0	13	0.001	19.7985	14.2731	Up	4.19e-05	0.000222609
POU5F1P5	937	0	14	0.001	19.7968	14.273	Up	1.94e-05	0.00011391
lnc-LGALS13-2	469	0	7	0.001	19.7757	14.2714	Up	0.00424012	0.0131515
lnc-GNA12-4	201	0	3	0.001	19.7757	14.2714	Up	0.0920882	0.167294
lnc-CCL1-1	536	0	8	0.001	19.7757	14.2714	Up	0.00196414	0.00667409
lnc-UTP23-3	402	0	6	0.001	19.7757	14.2714	Up	0.00915346	0.0247664
lnc-HLA-B-2	1207	0	18	0.001	19.7593	14.2702	Up	8.94e-07	7.06e-06
lnc-CAND1-2	604	0	9	0.001	19.743	14.2691	Up	0.000909842	0.00334978
lnc-SLC25A36-3	537	0	8	0.001	19.7389	14.2688	Up	0.00196414	0.00677139
lnc-MMP11-1	605	0	9	0.001	19.7104	14.2667	Up	0.000909842	0.00338445
lnc-PITPNA-1	269	0	4	0.001	19.7022	14.2661	Up	0.0426578	0.0933026
LOC644762	1614	0	24	0.001	19.7022	14.2661	Up	8.83e-09	1.03e-07
lnc-CTXN1-4	269	0	4	0.001	19.7022	14.2661	Up	0.0426578	0.0916211
lnc-SPATA7-2	1076	0	16	0.001	19.7022	14.2661	Up	4.16e-06	2.84e-05
lnc-MED18-1	1480	0	22	0.001	19.6956	14.2656	Up	4.11e-08	4.28e-07
lnc-UPF3A-3	471	0	7	0.001	19.6918	14.2653	Up	0.00424012	0.0131861
RNPC3	1885	0	28	0.001	19.6813	14.2645	Up	4.06e-10	5.98e-09
lnc-KIAA1109-2	539	0	8	0.001	19.6657	14.2634	Up	0.00196414	0.00666149
lnc-LONP2-5	539	0	8	0.001	19.6657	14.2634	Up	0.00196414	0.00666049
lnc-TOM1L2-2	876	0	13	0.001	19.6629	14.2632	Up	4.19e-05	0.000224334
lnc-GUSB-2	337	0	5	0.001	19.6584	14.2629	Up	0.0197602	0.0488492
lnc-MBOAT2-3	607	0	9	0.001	19.6454	14.2619	Up	0.000909842	0.00340617
lnc-DCBLD2-1	877	0	13	0.001	19.6404	14.2615	Up	4.19e-05	0.000226766
lnc-CDRT15-4	405	0	6	0.001	19.6292	14.2607	Up	0.00915346	0.0254233
lnc-ARHGEF2-1	1350	0	20	0.001	19.6292	14.2607	Up	1.92e-07	1.75e-06
lnc-DISP2-2	2970	0	44	0.001	19.6292	14.2607	Up	1.83e-15	5.95e-14
lnc-SNAI2-1	608	0	9	0.001	19.6131	14.2595	Up	0.000909842	0.00338137
lnc-OR6C6-2	946	0	14	0.001	19.6085	14.2592	Up	1.94e-05	0.000113717
lnc-AE000662.92.1-6	338	0	5	0.001	19.6002	14.2586	Up	0.0197602	0.0482283
lnc-C9orf171-2	541	0	8	0.001	19.593	14.258	Up	0.00196414	0.00674036
lnc-TMED9-2	541	0	8	0.001	19.593	14.258	Up	0.00196414	0.00667914
lnc-COL23A1-2	271	0	4	0.001	19.5568	14.2554	Up	0.0426578	0.0921896
lnc-C1orf21-6	271	0	4	0.001	19.5568	14.2554	Up	0.0426578	0.090904
lnc-TNFSF10-3	271	0	4	0.001	19.5568	14.2554	Up	0.0426578	0.0900583
POU5F1P3	1084	0	16	0.001	19.5568	14.2554	Up	4.16e-06	2.82e-05
lnc-GAS6-4	610	0	9	0.001	19.5488	14.2548	Up	0.000909842	0.00340361
lnc-DPY19L2-7	1220	0	18	0.001	19.5488	14.2548	Up	8.94e-07	7.06e-06
lnc-PDE6D-1	407	0	6	0.001	19.5328	14.2536	Up	0.00915346	0.0252159
TH2LCRR	407	0	6	0.001	19.5328	14.2536	Up	0.00915346	0.0248743
lnc-ATG10-2	2511	0	37	0.001	19.5237	14.2529	Up	3.99e-13	9.26e-12
lnc-PRTFDC1-1	543	0	8	0.001	19.5208	14.2527	Up	0.00196414	0.00665346
lnc-TMEM17-1	747	0	11	0.001	19.511	14.252	Up	0.000195233	0.000876353
ALG10	3127	0	46	0.001	19.4911	14.2505	Up	3.92e-16	1.43e-14
lnc-SMCR8-2	748	0	11	0.001	19.4849	14.2501	Up	0.000195233	0.000883058
lnc-DNAJC14-1	272	0	4	0.001	19.4849	14.2501	Up	0.0426578	0.0920258
lnc-CDRT4-1	340	0	5	0.001	19.4849	14.2501	Up	0.0197602	0.0483623
lnc-TMC3-2	476	0	7	0.001	19.4849	14.2501	Up	0.00424012	0.0129946
lnc-URB1-2	884	0	13	0.001	19.4849	14.2501	Up	4.19e-05	0.000224387
lnc-VAV1-1	272	0	4	0.001	19.4849	14.2501	Up	0.0426578	0.0908093
GDF3	1224	0	18	0.001	19.4849	14.2501	Up	8.94e-07	7.07e-06
lnc-RP11-101E3.5.1-1	408	0	6	0.001	19.4849	14.2501	Up	0.00915346	0.0247724
PRSS1	817	0	12	0.001	19.4611	14.2483	Up	9.04e-05	0.000440355
lnc-CAMK2G-1	545	0	8	0.001	19.4492	14.2474	Up	0.00196414	0.0066756
lnc-GPT2-6	477	0	7	0.001	19.4441	14.247	Up	0.00424012	0.0131916
lnc-MRPL2-1	409	0	6	0.001	19.4373	14.2465	Up	0.00915346	0.02475
ZNF239	2388	0	35	0.001	19.4196	14.2452	Up	1.86e-12	3.92e-11
lnc-DNAJB6-5	546	0	8	0.001	19.4135	14.2448	Up	0.00196414	0.00669536
lnc-HOOK1-2	683	0	10	0.001	19.3993	14.2437	Up	0.000421462	0.00173322
lnc-ZPLD1-10	410	0	6	0.001	19.3899	14.243	Up	0.00915346	0.025281
lnc-XCL1-2	410	0	6	0.001	19.3899	14.243	Up	0.00915346	0.0249649
SCAMP3	1572	0	23	0.001	19.3857	14.2427	Up	1.91e-08	2.09e-07
lnc-ALKBH2-3	1778	0	26	0.001	19.3753	14.2419	Up	1.89e-09	2.49e-08
MC4R	1438	0	21	0.001	19.3494	14.24	Up	8.88e-08	8.64e-07
lnc-C10orf68-3	411	0	6	0.001	19.3427	14.2395	Up	0.00915346	0.0253856
lnc-AC003101.1.1-3	274	0	4	0.001	19.3427	14.2395	Up	0.0426578	0.0919155
lnc-TALDO1-1	1302	0	19	0.001	19.3353	14.2389	Up	4.14e-07	3.49e-06
lnc-TANC2-2	2057	0	30	0.001	19.3239	14.2381	Up	8.72e-11	1.43e-09
lnc-ADCYAP1-2	549	0	8	0.001	19.3074	14.2369	Up	0.00196414	0.00671063
lnc-CCNF-2	1032	0	15	0.001	19.2583	14.2332	Up	8.99e-06	5.65e-05
lnc-SYCP1-1	1377	0	20	0.001	19.2444	14.2321	Up	1.92e-07	1.73e-06
lnc-THOC2-1	482	0	7	0.001	19.2424	14.232	Up	0.00424012	0.012999
lnc-PROC-3	896	0	13	0.001	19.2239	14.2306	Up	4.19e-05	0.000227095
lnc-UBA5-2	1517	0	22	0.001	19.2152	14.23	Up	4.11e-08	4.24e-07
lnc-GK-3	621	0	9	0.001	19.2025	14.229	Up	0.000909842	0.003425
lnc-LCP2-3	621	0	9	0.001	19.2025	14.229	Up	0.000909842	0.00341043
lnc-SORCS1-10	483	0	7	0.001	19.2025	14.229	Up	0.00424012	0.0130739
lnc-C4orf52-1	483	0	7	0.001	19.2025	14.229	Up	0.00424012	0.0130551
lnc-ZNF683-4	897	0	13	0.001	19.2025	14.229	Up	4.19e-05	0.00022495
lnc-ZNF26-8	345	0	5	0.001	19.2025	14.229	Up	0.0197602	0.0478101
lnc-CGNL1-3	1726	0	25	0.001	19.1914	14.2282	Up	4.09e-09	5.09e-08
lnc-JMJD1C-3	622	0	9	0.001	19.1716	14.2267	Up	0.000909842	0.00342013
lnc-IL17RC-2	553	0	8	0.001	19.1678	14.2264	Up	0.00196414	0.00678128
lnc-RAD23B-2	969	0	14	0.001	19.1431	14.2245	Up	1.94e-05	0.000114149
MVK	2077	0	30	0.001	19.1378	14.2241	Up	8.72e-11	1.43e-09
lnc-DSC2-1	554	0	8	0.001	19.1332	14.2238	Up	0.00196414	0.00671318
lnc-IKZF1-2	762	0	11	0.001	19.1269	14.2233	Up	0.000195233	0.000881638
lnc-COL22A1-1	485	0	7	0.001	19.1233	14.223	Up	0.00424012	0.0130426
lnc-EDN2-2	485	0	7	0.001	19.1233	14.223	Up	0.00424012	0.0128076
lnc-SYF2-1	970	0	14	0.001	19.1233	14.223	Up	1.94e-05	0.000111979
lnc-FAM27E1.1-10	208	0	3	0.001	19.1102	14.2221	Up	0.0920882	0.171453
lnc-RING1-1	624	0	9	0.001	19.1102	14.2221	Up	0.000909842	0.00339175
lnc-RP11-362K2.2.1-1	555	0	8	0.001	19.0987	14.2212	Up	0.00196414	0.006745
lnc-MTRR-13	347	0	5	0.001	19.0918	14.2207	Up	0.0197602	0.0488573
lnc-GRID2IP-4	347	0	5	0.001	19.0918	14.2207	Up	0.0197602	0.0483044
IFI35	1250	0	18	0.001	19.0796	14.2197	Up	8.94e-07	7.03e-06
TGM6	2292	0	33	0.001	19.0768	14.2195	Up	8.67e-12	1.66e-10
lnc-ATP1A1-1	417	0	6	0.001	19.0644	14.2186	Up	0.00915346	0.0248653
lnc-GPR135-2	2850	0	41	0.001	19.061	14.2183	Up	1.84e-14	5.25e-13
lnc-CD97-1	765	0	11	0.001	19.0519	14.2176	Up	0.000195233	0.000877581
lnc-ZNF521-1	487	0	7	0.001	19.0448	14.2171	Up	0.00424012	0.0129839
PRR22	1392	0	20	0.001	19.037	14.2165	Up	1.92e-07	1.75e-06
lnc-GUSB-9	1393	0	20	0.001	19.0233	14.2155	Up	1.92e-07	1.74e-06
lnc-FAM71F2-7	209	0	3	0.001	19.0188	14.2151	Up	0.0920882	0.169313
lnc-CAPS-3	209	0	3	0.001	19.0188	14.2151	Up	0.0920882	0.166118
lnc-ANKMY1-1	209	0	3	0.001	19.0188	14.2151	Up	0.0920882	0.165905
lnc-VN1R1-2	1045	0	15	0.001	19.0188	14.2151	Up	8.99e-06	5.62e-05
lnc-DUSP18-2	1115	0	16	0.001	19.0131	14.2147	Up	4.16e-06	2.83e-05
lnc-SGSH-3	906	0	13	0.001	19.0118	14.2146	Up	4.19e-05	0.000223031
lnc-ATXN3L-4	558	0	8	0.001	18.996	14.2134	Up	0.00196414	0.00664995
lnc-CYP11B1-1	349	0	5	0.001	18.9824	14.2124	Up	0.0197602	0.0480196
lnc-ADA-2	768	0	11	0.001	18.9775	14.212	Up	0.000195233	0.000883592
lnc-DIAPH3-10	419	0	6	0.001	18.9734	14.2117	Up	0.00915346	0.0252966
lnc-FURIN-3	559	0	8	0.001	18.9621	14.2108	Up	0.00196414	0.0065874
CMTR1	4124	0	59	0.001	18.9557	14.2103	Up	1.77e-20	1.09e-18
lnc-RPL3-1	420	0	6	0.001	18.9282	14.2082	Up	0.00915346	0.0255306
MIXL1	2030	0	29	0.001	18.9282	14.2082	Up	1.88e-10	2.94e-09
lnc-SCG2-1	280	0	4	0.001	18.9282	14.2082	Up	0.0426578	0.0920126
lnc-AL901608.1-36	280	0	4	0.001	18.9282	14.2082	Up	0.0426578	0.0915073
lnc-ABI3-5	210	0	3	0.001	18.9282	14.2082	Up	0.0920882	0.166526
lnc-COMTD1-1	350	0	5	0.001	18.9282	14.2082	Up	0.0197602	0.0475159
lnc-OXSM-4	701	0	10	0.001	18.9012	14.2062	Up	0.000421462	0.00175053
lnc-GSTM3-1	491	0	7	0.001	18.8896	14.2053	Up	0.00424012	0.0131525
lnc-RGN-2	421	0	6	0.001	18.8832	14.2048	Up	0.00915346	0.0249634
lnc-LRRC37B-1	1895	0	27	0.001	18.8783	14.2044	Up	8.78e-10	1.21e-08
lnc-AC021066.1-1	562	0	8	0.001	18.8608	14.2031	Up	0.00196414	0.00673111
lnc-ARRDC3-10	843	0	12	0.001	18.8608	14.2031	Up	9.04e-05	0.000443479
lnc-CRYAA-15	1897	0	27	0.001	18.8583	14.2029	Up	8.78e-10	1.22e-08
lnc-UBE2N-4	492	0	7	0.001	18.8513	14.2024	Up	0.00424012	0.012953
MRPL27	703	0	10	0.001	18.8474	14.2021	Up	0.000421462	0.00172203
lnc-PRRC2C-4	422	0	6	0.001	18.8385	14.2014	Up	0.00915346	0.0251389
lnc-RDH8-3	916	0	13	0.001	18.8042	14.1988	Up	4.19e-05	0.000226575
lnc-MUC20-9	564	0	8	0.001	18.794	14.198	Up	0.00196414	0.00664044
EDF1	846	0	12	0.001	18.794	14.198	Up	9.04e-05	0.00044045
lnc-LRRN3-2	2471	0	35	0.001	18.7673	14.1959	Up	1.86e-12	3.91e-11
lnc-TSEN2-2	565	0	8	0.001	18.7607	14.1954	Up	0.00196414	0.00660861
lnc-RNF187-1	565	0	8	0.001	18.7607	14.1954	Up	0.00196414	0.00659035
lnc-LRRC61-2	989	0	14	0.001	18.7559	14.1951	Up	1.94e-05	0.000112383
lnc-FHL2-2	424	0	6	0.001	18.7496	14.1946	Up	0.00915346	0.0256069
lnc-PTTG1-6	2332	0	33	0.001	18.7496	14.1946	Up	8.67e-12	1.66e-10
lnc-RECQL5-2	566	0	8	0.001	18.7275	14.1929	Up	0.00196414	0.00678232
lnc-C14orf126-6	566	0	8	0.001	18.7275	14.1929	Up	0.00196414	0.00668217
lnc-FRK-2	283	0	4	0.001	18.7275	14.1929	Up	0.0426578	0.0907448
lnc-ALG10B-1	566	0	8	0.001	18.7275	14.1929	Up	0.00196414	0.00658937
RAB42	1133	0	16	0.001	18.711	14.1916	Up	4.16e-06	2.86e-05
lnc-SLC34A2-2	1558	0	22	0.001	18.7095	14.1915	Up	4.11e-08	4.26e-07
lnc-TSPAN15-1	1275	0	18	0.001	18.7055	14.1912	Up	8.94e-07	7.06e-06
lnc-IL5RA-5	425	0	6	0.001	18.7055	14.1912	Up	0.00915346	0.0247843
lnc-AHCY-4	496	0	7	0.001	18.6992	14.1907	Up	0.00424012	0.0129284
lnc-STOX2-2	496	0	7	0.001	18.6992	14.1907	Up	0.00424012	0.0128007
lnc-CIB4-1	567	0	8	0.001	18.6945	14.1903	Up	0.00196414	0.00671472
lnc-NCL-1	1843	0	26	0.001	18.692	14.1901	Up	1.89e-09	2.5e-08
lnc-GSG1L-7	2481	0	35	0.001	18.6917	14.1901	Up	1.86e-12	3.92e-11
lnc-OCA2-8	780	0	11	0.001	18.6855	14.1896	Up	0.000195233	0.000869577
lnc-GDPD4-2	568	0	8	0.001	18.6616	14.1878	Up	0.00196414	0.00670146
lnc-RABL2B-1	284	0	4	0.001	18.6616	14.1878	Up	0.0426578	0.0904963
lnc-BSX-2	1491	0	21	0.001	18.6616	14.1878	Up	8.88e-08	8.57e-07
lnc-SLC24A5-8	568	0	8	0.001	18.6616	14.1878	Up	0.00196414	0.00659676
lnc-GLRX5-3	356	0	5	0.001	18.6092	14.1837	Up	0.0197602	0.0478514
lnc-CTD-2117L12.1.1-1	641	0	9	0.001	18.6034	14.1833	Up	0.000909842	0.00335473
lnc-CTD-2054N24.2.1-3	1781	0	25	0.001	18.5987	14.1829	Up	4.09e-09	5.05e-08
lnc-MGAT5B-2	1140	0	16	0.001	18.5961	14.1827	Up	4.16e-06	2.87e-05
lnc-ZNF580-1	285	0	4	0.001	18.5961	14.1827	Up	0.0426578	0.0929722
lnc-PPIE-9	285	0	4	0.001	18.5961	14.1827	Up	0.0426578	0.0924609
lnc-ZNF827-3	285	0	4	0.001	18.5961	14.1827	Up	0.0426578	0.0920744
lnc-C14orf101-1	285	0	4	0.001	18.5961	14.1827	Up	0.0426578	0.0898008
lnc-DAAM1-8	570	0	8	0.001	18.5961	14.1827	Up	0.00196414	0.00661357
lnc-ZNF517-2	855	0	12	0.001	18.5961	14.1827	Up	9.04e-05	0.000440116
lnc-AC099552.4.1-5	1925	0	27	0.001	18.584	14.1818	Up	8.78e-10	1.22e-08
lnc-NPHS1-1	2282	0	32	0.001	18.5798	14.1814	Up	1.87e-11	3.37e-10
lnc-SOX30-1	428	0	6	0.001	18.5744	14.181	Up	0.00915346	0.0253652
lnc-FGFR1-1	856	0	12	0.001	18.5744	14.181	Up	9.04e-05	0.000446844
lnc-CCT8-4	214	0	3	0.001	18.5744	14.181	Up	0.0920882	0.165494
lnc-PHF14-12	214	0	3	0.001	18.5744	14.181	Up	0.0920882	0.165434
lnc-SCAND3-3	214	0	3	0.001	18.5744	14.181	Up	0.0920882	0.163331
HIST1H2AA	500	0	7	0.001	18.5496	14.1791	Up	0.00424012	0.0130632
lnc-PQLC2-5	286	0	4	0.001	18.5311	14.1777	Up	0.0426578	0.0898345
lnc-AC106017.3.1-3	1931	0	27	0.001	18.5263	14.1773	Up	8.78e-10	1.23e-08
OR5AC2	930	0	13	0.001	18.5211	14.1769	Up	4.19e-05	0.000225706
lnc-NLRP3-7	1074	0	15	0.001	18.5052	14.1756	Up	8.99e-06	5.61e-05
lnc-ZNF329-1	2220	0	31	0.001	18.5019	14.1754	Up	4.04e-11	6.98e-10
lnc-ENC1-6	788	0	11	0.001	18.4958	14.1749	Up	0.000195233	0.000885644
lnc-C6orf48-1	215	0	3	0.001	18.488	14.1743	Up	0.0920882	0.164867
lnc-CLDN25-4	287	0	4	0.001	18.4665	14.1726	Up	0.0426578	0.0933845
lnc-ASPH-6	287	0	4	0.001	18.4665	14.1726	Up	0.0426578	0.0930354
OR4D1	933	0	13	0.001	18.4616	14.1722	Up	4.19e-05	0.000223561
lnc-PSD4-5	646	0	9	0.001	18.4594	14.1721	Up	0.000909842	0.00335583
lnc-UBA5-1	359	0	5	0.001	18.4537	14.1716	Up	0.0197602	0.0482912
lnc-SUCLA2-1	431	0	6	0.001	18.4451	14.171	Up	0.00915346	0.0248683
AIRE	2299	0	32	0.001	18.4424	14.1707	Up	1.87e-11	3.36e-10
CHIC2	1150	0	16	0.001	18.4344	14.1701	Up	4.16e-06	2.85e-05
lnc-AIM2-2	1942	0	27	0.001	18.4214	14.1691	Up	8.78e-10	1.22e-08
lnc-ZNF320-1	720	0	10	0.001	18.4024	14.1676	Up	0.000421462	0.00175134
lnc-CLIP4-2	360	0	5	0.001	18.4024	14.1676	Up	0.0197602	0.0475006
C9orf47	4896	0	68	0.001	18.4024	14.1676	Up	1.74e-23	1.5e-21
lnc-RP11-1277H1.1.1-11	360	0	5	0.001	18.4024	14.1676	Up	0.0197602	0.0471825
lnc-RGPD3-4	216	0	3	0.001	18.4024	14.1676	Up	0.0920882	0.162631
lnc-RALYL-5	1516	0	21	0.001	18.3539	14.1638	Up	8.88e-08	8.65e-07
lnc-CRCT1-1	361	0	5	0.001	18.3514	14.1636	Up	0.0197602	0.047787
lnc-COL4A2-8	650	0	9	0.001	18.3458	14.1632	Up	0.000909842	0.00335721
lnc-FAM101B-2	434	0	6	0.001	18.3176	14.1609	Up	0.00915346	0.025529
lnc-RNF40-3	434	0	6	0.001	18.3176	14.1609	Up	0.00915346	0.0247903
lnc-CALM1-1	2026	0	28	0.001	18.3116	14.1605	Up	4.06e-10	5.96e-09
CLEC9A	1737	0	24	0.001	18.3071	14.1601	Up	8.83e-09	1.03e-07
lnc-MED27-2	362	0	5	0.001	18.3007	14.1596	Up	0.0197602	0.0473713
lnc-PRR20E-3	869	0	12	0.001	18.2965	14.1593	Up	9.04e-05	0.000445717
lnc-STX16-2	507	0	7	0.001	18.2935	14.159	Up	0.00424012	0.0127784
lnc-PML-2	725	0	10	0.001	18.2755	14.1576	Up	0.000421462	0.00175231
lnc-SLC23A1-3	435	0	6	0.001	18.2755	14.1576	Up	0.00915346	0.0250668
lnc-USF2-2	1016	0	14	0.001	18.2575	14.1562	Up	1.94e-05	0.000111936
lnc-ERCC6L-1	363	0	5	0.001	18.2503	14.1556	Up	0.0197602	0.0486485
lnc-AL391421.1-8	2689	0	37	0.001	18.2313	14.1541	Up	3.99e-13	9.35e-12
lnc-GAP43-10	291	0	4	0.001	18.2127	14.1527	Up	0.0426578	0.0903555
lnc-IL23R-1	728	0	10	0.001	18.2002	14.1517	Up	0.000421462	0.00171237
lnc-ZNF23-5	874	0	12	0.001	18.1919	14.151	Up	9.04e-05	0.000448027
lnc-ITM2C-1	1020	0	14	0.001	18.1859	14.1505	Up	1.94e-05	0.000112094
lnc-YES1-6	292	0	4	0.001	18.1503	14.1477	Up	0.0426578	0.091867
UBA3	2119	0	29	0.001	18.1332	14.1463	Up	1.88e-10	2.95e-09
lnc-SMAD7-2	877	0	12	0.001	18.1296	14.1461	Up	9.04e-05	0.00043964
lnc-DLX2-3	512	0	7	0.001	18.1149	14.1449	Up	0.00424012	0.0131634
lnc-ALKBH1-1	366	0	5	0.001	18.1007	14.1438	Up	0.0197602	0.0485394
lnc-GGA2-3	293	0	4	0.001	18.0884	14.1428	Up	0.0426578	0.091503
lnc-DOCK5-2	806	0	11	0.001	18.0828	14.1423	Up	0.000195233	0.000866912
lnc-SOX9-3	1833	0	25	0.001	18.0711	14.1414	Up	4.09e-09	5.05e-08
lnc-AC004223.1-2	440	0	6	0.001	18.0678	14.1411	Up	0.00915346	0.025099
lnc-GMNC-2	367	0	5	0.001	18.0514	14.1398	Up	0.0197602	0.0487768
lnc-IL12RB1-2	367	0	5	0.001	18.0514	14.1398	Up	0.0197602	0.0478153
lnc-SH3BGRL2-7	367	0	5	0.001	18.0514	14.1398	Up	0.0197602	0.0474017
lnc-AC015804.1-5	734	0	10	0.001	18.0514	14.1398	Up	0.000421462	0.00171315
lnc-TRIML2-2	661	0	9	0.001	18.0405	14.139	Up	0.000909842	0.00335638
lnc-ACSM4-1	441	0	6	0.001	18.0269	14.1379	Up	0.00915346	0.0255687
lnc-TNFRSF21-3	294	0	4	0.001	18.0269	14.1379	Up	0.0426578	0.0925636
lnc-DISP1-3	515	0	7	0.001	18.0094	14.1365	Up	0.00424012	0.0128257
NME1	1031	0	14	0.001	17.9919	14.1351	Up	1.94e-05	0.000112732
lnc-DDX51-5	442	0	6	0.001	17.9861	14.1346	Up	0.00915346	0.0251696
SYCE3	442	0	6	0.001	17.9861	14.1346	Up	0.00915346	0.0251235
lnc-SUMF2-14	738	0	10	0.001	17.9536	14.132	Up	0.000421462	0.0017452
lnc-ZCCHC9-3	369	0	5	0.001	17.9536	14.132	Up	0.0197602	0.0487527
lnc-XIAP-4	443	0	6	0.001	17.9455	14.1313	Up	0.00915346	0.0253684
lnc-RP11-380D23.1.1-4	739	0	10	0.001	17.9293	14.13	Up	0.000421462	0.00173433
SCGB3A2	518	0	7	0.001	17.905	14.1281	Up	0.00424012	0.0131072
lnc-PTGR2-3	370	0	5	0.001	17.905	14.1281	Up	0.0197602	0.0483913
lnc-CA6-6	222	0	3	0.001	17.905	14.1281	Up	0.0920882	0.167497
lnc-NDUFS6-2	370	0	5	0.001	17.905	14.1281	Up	0.0197602	0.0477356
C11orf86	1185	0	16	0.001	17.8899	14.1269	Up	4.16e-06	2.82e-05
OR52N4	1037	0	14	0.001	17.8878	14.1267	Up	1.94e-05	0.000113127
lnc-CDH5-15	963	0	13	0.001	17.8865	14.1266	Up	4.19e-05	0.000226712
lnc-FANCM-5	667	0	9	0.001	17.8782	14.1259	Up	0.000909842	0.00340304
lnc-AL078585.1-11	1112	0	15	0.001	17.8728	14.1255	Up	8.99e-06	5.64e-05
lnc-FGF12-3	1631	0	22	0.001	17.8721	14.1254	Up	4.11e-08	4.27e-07
lnc-KIAA1755-14	297	0	4	0.001	17.8448	14.1232	Up	0.0426578	0.0909644
lnc-REV3L-3	297	0	4	0.001	17.8448	14.1232	Up	0.0426578	0.0902661
lnc-GNG12-2	297	0	4	0.001	17.8448	14.1232	Up	0.0426578	0.0902193
lnc-TTC3-3	297	0	4	0.001	17.8448	14.1232	Up	0.0426578	0.0891575
lnc-AL138831.1-2	520	0	7	0.001	17.8362	14.1225	Up	0.00424012	0.0129848
[truncated: 42,930 more rows]
